# Supplementary material for: Achieving tissue-level softness on stretchable electronics through a generalizable soft interlayer design
Source: Nat Commun. 2023 Jul 26;14:4488. doi: 10.1038/s41467-023-40191-3 (PMC10372055; doi:10.1038/s41467-023-40191-3)
Supplement: Supplementary file 7 — Source Data [file 41467_2023_40191_MOESM7_ESM.xlsx]

## Sheet: Figure 1d
	Young's modulus (kPa)		Pure hydrogel	Strain (%)	Stress (kPa)		Ultrasoft device	Strain (%)	Stress (kPa)
PDMS	1850			0	0.00676			0	0.86808
SEBS	2870			0	0.0314			0	0.53075
Eco-Flex	46			0	-0.06821			0	1.08909
Ultrasoft device	5.2			0	-0.06281			0	0.81069
Hydrogel	2.58			0.0017	0.10861			0	1.21686
				0.01127	-0.31174			0.00934	1.34337
				0.02396	-0.42332			0.02029	1.3648
				0.03871	-0.76567			0.0354	1.01455
				0.04766	-0.63366			0.0527	0.76482
				0.05675	-0.57829			0.06179	0.8808
				0.06578	-0.55046			0.07238	0.82522
				0.07515	-0.64508			0.08346	0.70301
				0.08465	-0.67625			0.09408	0.63424
				0.09508	-0.3042			0.10429	0.73286
				0.10582	-0.12029			0.11495	0.72096
				0.11668	-0.27327			0.12693	0.6344
				0.12799	-0.25997			0.13948	0.8502
				0.1397	-0.12905			0.15169	1.0554
				0.15129	-0.02361			0.16416	1.10132
				0.16393	-0.05461			0.17785	1.03439
				0.17671	-0.21057			0.19279	1.02696
				0.19022	-0.19535			0.20748	1.16158
				0.20249	0.10533			0.22259	1.24999
				0.21647	0.1244			0.23742	1.17165
				0.2312	-0.009			0.25239	1.15471
				0.24664	0.11082			0.2678	1.29543
				0.26127	0.08419			0.2831	1.20835
				0.27661	0.09777			0.29864	1.06685
				0.29329	-0.14248			0.31566	1.0177
				0.31008	-0.29953			0.33473	0.94551
				0.32687	-0.41913			0.35393	0.82346
				0.34437	-0.40025			0.37398	0.61412
				0.36159	-0.48903			0.39437	0.60449
				0.37865	-0.32152			0.415	0.61342
				0.3959	-0.32184			0.43529	0.64999
				0.41269	-0.53172			0.45556	0.58821
				0.42811	-0.43062			0.47634	0.50071
				0.4438	-0.6197			0.49802	0.77761
				0.46236	-0.69364			0.51898	0.87691
				0.4826	-0.63492			0.54024	1.07245
				0.5025	-0.36909			0.56153	1.29475
				0.52129	-0.03744			0.58269	1.49357
				0.53877	-0.07607			0.60335	1.58123
				0.55879	-0.38783			0.6245	1.66144
				0.58201	-0.29374			0.6461	1.75553
				0.60594	0.01836			0.66854	1.76587
				0.62948	-0.02746			0.69081	1.70402
				0.65375	0.13327			0.71342	1.6141
				0.67828	0.20204			0.73694	1.72174
				0.70263	0.30763			0.76164	1.61689
				0.72683	0.4407			0.78737	1.47141
				0.75155	0.33018			0.81298	1.33632
				0.77709	0.38548			0.83963	1.28901
				0.80111	0.42074			0.86685	1.21811
				0.82433	0.3077			0.89529	0.90275
				0.84925	0.1078			0.9236	0.80107
				0.87519	0.10481			0.9505	0.91625
				0.90256	0.12176			0.9763	1.06258
				0.93049	0.21741			1.00259	0.94888
				0.95994	0.16345			1.03025	0.78909
				0.9898	0.08658			1.05947	0.80352
				1.01953	-0.0223			1.08948	0.97656
				1.05093	-0.12001			1.12053	0.99178
				1.0839	0.02873			1.15269	0.96252
				1.11645	0.18043			1.18358	1.06473
				1.14771	0.24078			1.2145	1.15172
				1.17819	0.24068			1.24664	1.21941
				1.20832	0.2779			1.27854	1.1764
				1.23786	0.49772			1.31047	1.07205
				1.26731	0.54917			1.34242	1.18795
				1.29459	0.38726			1.37349	1.22911
				1.32105	0.44845			1.40298	1.17705
				1.34573	0.57736			1.43233	1.13101
				1.36961	0.71156			1.45986	1.12088
				1.39427	0.57496			1.48755	1.21472
				1.41945	0.63255			1.51404	1.27857
				1.44521	0.7411			1.54044	1.25674
				1.47127	0.75527			1.56801	1.02527
				1.49888	0.47627			1.59512	1.10897
				1.5264	0.22654			1.62195	1.31925
				1.55456	0.26417			1.64938	1.45618
				1.58247	0.18618			1.67719	1.34107
				1.60942	0.07145			1.70477	1.2594
				1.63557	-0.24069			1.73222	1.39238
				1.66194	-0.20466			1.76057	1.60368
				1.68906	-0.03508			1.78937	1.50929
				1.71692	0.04167			1.8172	1.51075
				1.74499	0.0105			1.84369	1.73092
				1.77393	-0.06507			1.87078	1.97133
				1.80374	0.04506			1.89902	1.93787
				1.83444	0.18607			1.92811	1.722
				1.8648	0.24012			1.95779	1.89107
				1.8954	0.22168			1.98845	2.07686
				1.92706	0.26756			2.01952	2.02225
				1.95844	0.34007			2.05076	1.69312
				1.98935	0.23613			2.08212	1.59399
				2.02	0.12892			2.11444	1.59433
				2.0501	-0.02311			2.14695	1.69941
				2.0793	0.163			2.17865	1.62205
				2.10756	0.20779			2.20961	1.26264
				2.1337	0.07369			2.24024	1.2408
				2.15917	-0.07815			2.27056	1.24069
				2.18445	0.02073			2.3003	1.3642
				2.21051	0.18302			2.32833	1.27096
				2.23549	0.29381			2.35506	1.37049
				2.2597	0.20756			2.38218	1.58929
				2.2845	0.08707			2.41018	1.82316
				2.31074	0.18154			2.43787	1.70524
				2.33739	0.12371			2.46461	1.45137
				2.36431	-0.00564			2.4906	1.70499
				2.39203	-0.00344			2.51711	1.97249
				2.41996	0.19461			2.54493	2.03763
				2.44759	0.32803			2.57192	1.75464
				2.47435	0.38285			2.59987	1.82923
				2.50065	0.3438			2.62873	2.02374
				2.52777	0.52168			2.65686	2.22006
				2.55531	0.62532			2.6831	1.98942
				2.58411	0.85041			2.70911	1.64618
				2.61413	0.7585			2.73642	1.85852
				2.64374	0.81673			2.76441	1.99646
				2.67369	0.63441			2.79366	1.93362
				2.70327	0.57724			2.823	1.76968
				2.73366	0.47408			2.85259	1.88525
				2.76545	0.35601			2.88349	2.06835
				2.7975	0.15251			2.91489	2.03059
				2.8293	0.00478			2.94702	1.74651
				2.8599	-0.03663			2.98046	1.73701
				2.88879	-0.39274			3.01345	2.31645
				2.91739	-0.57093			3.04543	2.51908
				2.94454	-0.54407			3.0764	2.3989
				2.97073	-0.2644			3.10636	2.26339
				2.9967	-0.20138			3.13534	2.34844
				3.02208	-0.23426			3.16421	2.61236
				3.04779	-0.24758			3.19237	2.61327
				3.07374	0.09928			3.21958	2.48201
				3.09975	0.36811			3.24639	2.54425
				3.12564	0.46619			3.2734	2.8695
				3.15203	0.62266			3.30123	2.88188
				3.17816	0.93582			3.3283	2.70212
				3.20531	1.22555			3.35574	2.56472
				3.23349	1.22055			3.38432	2.70048
				3.26054	1.26786			3.41261	2.84278
				3.28611	1.2612			3.44037	2.62151
				3.31233	1.27384			3.46875	2.39271
				3.339	1.0074			3.4969	2.43959
				3.36655	0.76326			3.52622	2.64858
				3.39438	0.74243			3.55425	2.49141
				3.42228	0.78217			3.58067	2.12706
				3.45021	0.73688			3.60686	1.91719
				3.47997	0.49576			3.63427	2.17533
				3.51069	0.45306			3.66288	2.30989
				3.54144	0.24403			3.69234	2.21573
				3.5726	0.23058			3.72354	2.15601
				3.60455	0.24292			3.75505	2.35823
				3.63601	0.46429			3.78565	2.60028
				3.66639	0.54371			3.81688	2.54878
				3.69604	0.65138			3.84957	2.35277
				3.72565	0.83909			3.8819	2.34916
				3.75394	0.95975			3.91349	2.63857
				3.78219	0.84874			3.94453	2.86027
				3.80851	0.6811			3.97498	2.59715
				3.83436	0.85218			4.00534	2.60531
				3.86044	0.97516			4.03344	2.91499
				3.88719	1.16006			4.06003	2.94311
				3.91339	1.00462			4.08677	2.69505
				3.93882	1.15657			4.11379	2.48877
				3.96445	1.17359			4.14014	2.65018
				3.99064	0.90184			4.16691	3.04161
				4.01704	0.65531			4.19396	3.11567
				4.04437	0.66601			4.22145	2.73657
				4.07279	0.87476			4.24968	2.55686
				4.09908	0.81187			4.27788	2.51946
				4.12306	0.73625			4.30688	2.38214
				4.1475	0.52091			4.33668	2.31747
				4.17309	0.58408			4.36661	2.28778
				4.20025	0.49775			4.39537	2.50434
				4.22765	0.45796			4.42328	2.70022
				4.25676	0.54833			4.44909	2.73925
				4.28619	0.6305			4.47559	2.54428
				4.31627	0.84147			4.50359	2.52951
				4.34675	0.84817			4.53229	3.00206
				4.37699	0.87659			4.56166	3.27445
				4.40798	0.71144			4.59244	3.1803
				4.43953	0.63679			4.62314	2.99898
				4.47072	0.52932			4.65431	3.18705
				4.50117	0.50052			4.68713	3.24706
				4.53123	0.3482			4.72092	3.07214
				4.56088	0.48356			4.75514	2.68245
				4.58914	0.57248			4.788	2.63246
				4.61704	0.58751			4.81947	2.84424
				4.64467	0.56535			4.85018	2.70689
				4.67064	0.52242			4.8796	2.3886
				4.69616	0.84923			4.90787	2.37759
				4.72128	1.06053			4.93448	2.60335
				4.74697	1.05194			4.9611	2.61441
				4.77359	0.96569			4.98748	2.52002
				4.79995	1.01881			5.01328	2.45441
				4.82718	0.9681			5.03983	2.59417
				4.85529	0.85497			5.06651	2.87993
				4.88312	0.7908			5.09355	2.94564
				4.91098	0.80317			5.12173	2.87169
				4.93759	0.96149			5.14941	2.86909
				4.9629	0.96948			5.17704	3.02795
				4.98806	0.99845			5.20654	3.23777
				5.01372	1.12201			5.23675	3.324
				5.04008	1.26449			5.26581	3.29615
				5.06772	1.33709			5.29264	3.40008
				5.09654	1.41068			5.31897	3.57912
				5.12609	1.58007			5.34628	3.58028
				5.15607	1.60519			5.37448	3.41849
				5.18548	1.64981			5.40374	3.3415
				5.21514	1.61484			5.43372	3.5745
				5.24631	1.445			5.46488	3.68016
				5.27845	1.18984			5.49717	3.52119
				5.30977	1.02628			5.53	3.27137
				5.34089	0.91262			5.56365	3.3288
				5.3696	0.9398			5.5974	3.58076
				5.39944	0.84511			5.62992	3.43849
				5.4272	0.78821			5.66161	3.08984
				5.45302	0.87103			5.69293	2.95756
				5.47934	0.70734			5.72336	3.16264
				5.50606	0.585			5.75235	3.20196
				5.53185	0.55764			5.78046	3.05735
				5.55672	0.63648			5.80805	2.98003
				5.58289	0.66112			5.83489	3.21735
				5.60948	0.72777			5.86102	3.3585
				5.63629	0.91375			5.88611	3.23844
				5.66404	1.0443			5.91147	3.31838
				5.69181	1.20675			5.93709	3.48856
				5.71867	1.15441			5.96306	3.78405
				5.747	1.16076			5.98983	3.90018
				5.77541	1.25933			6.01767	3.96075
				5.80182	1.29409			6.04618	3.95844
				5.82681	1.23653			6.07485	4.1253
				5.85191	1.29173			6.10441	4.0237
				5.87837	1.40993			6.13313	3.86121
				5.90618	1.46524			6.16165	3.65865
				5.93654	1.40015			6.18901	3.55793
				5.96695	1.23567			6.21699	3.77629
				5.99656	1.14564			6.24625	3.87195
				6.02658	1.16965			6.27534	3.80097
				6.05761	1.11046			6.30513	3.49527
				6.08932	1.16315			6.33543	3.48573
				6.12165	1.28456			6.36668	3.49805
				6.15295	1.35825			6.39814	3.54138
				6.18316	1.26921			6.43063	3.49894
				6.21238	1.12367			6.46422	3.66989
				6.24089	1.21381			6.4969	3.93823
				6.26848	1.24486			6.52925	4.11667
				6.29479	1.24445			6.56095	3.90014
				6.3204	1.42114			6.5912	3.83703
				6.34635	1.59296			6.62005	4.09064
				6.37254	1.60303			6.64816	4.30632
				6.39797	1.61572			6.67609	4.29879
				6.42333	1.71644			6.70259	4.11711
				6.44892	1.7964			6.72882	4.24151
				6.47521	1.65453			6.7547	4.43784
				6.50227	1.57862			6.7807	4.3156
				6.52937	1.63085			6.80744	3.86217
				6.55767	1.72903			6.83425	3.71602
				6.58684	1.61349			6.86195	3.66842
				6.61371	1.51073			6.88995	3.79542
				6.63984	1.51193			6.9183	3.64954
				6.66519	1.66512			6.94717	3.43544
				6.69131	1.58903			6.97505	3.53434
				6.71816	1.50596			7.00231	3.70871
				6.74636	1.65058			7.03039	3.60167
				6.77584	1.62816			7.05788	3.48286
				6.80581	1.55244			7.08585	3.58609
				6.83541	1.38567			7.11442	3.98147
				6.86628	1.43151			7.14364	4.34539
				6.89833	1.45245			7.17354	4.15033
				6.93096	1.53999			7.20435	4.05214
				6.96336	1.44761			7.23535	4.20591
				6.99462	1.36388			7.26616	4.59033
				7.02489	1.33712			7.29779	4.42004
				7.05403	1.19206			7.33076	4.0991
				7.08287	1.31824			7.364	4.26741
				7.11061	1.2814			7.39598	4.49054
				7.13709	1.3152			7.42752	4.38075
				7.16239	1.23763			7.45853	3.8728
				7.18777	1.37965			7.4877	3.67827
				7.21451	1.41342			7.51653	3.939
				7.24045	1.4629			7.54453	4.1501
				7.26601	1.4873			7.5714	3.7513
				7.29229	1.53369			7.59756	3.5592
				7.31984	1.71975			7.62387	4.00809
				7.34687	1.53491			7.65009	4.15375
				7.37373	1.21058			7.6774	4.07681
				7.40144	1.27743			7.705	3.83704
				7.42845	1.39153			7.73178	3.94446
				7.45534	1.25076			7.75898	4.31948
				7.48248	0.99443			7.78676	4.23744
				7.50809	0.84006			7.81459	3.86054
				7.53396	0.87698			7.84159	3.87249
				7.56046	1.00879			7.86783	4.18312
				7.58913	0.80781			7.89434	4.26754
				7.61878	0.71234			7.9215	4.23785
				7.64845	1.15057			7.94924	4.24356
				7.67779	1.32188			7.97824	4.50186
				7.707	1.31633			8.00779	4.99154
				7.7374	1.27149			8.03713	5.11651
				7.76971	1.34773			8.0671	4.96661
				7.80266	1.51191			8.09931	4.99351
				7.83472	1.48717			8.13185	5.22482
				7.86549	1.2014			8.16447	5.23731
				7.89465	1.24103			8.19716	4.90462
				7.92253	1.38839			8.22968	4.57236
				7.95039	1.3951			8.2614	4.59228
				7.97682	1.31518			8.29284	4.71803
				8.00197	1.16499			8.32348	4.45474
				8.02784	1.00624			8.35297	3.98216
				8.05349	1.03906			8.38095	3.93717
				8.0787	0.95055			8.40795	4.36316
				8.10468	0.91951			8.43476	4.38368
				8.13076	0.99331			8.46135	4.16982
				8.15699	1.12314			8.48812	4.13073
				8.18446	1.30382			8.51522	4.47905
				8.21249	1.33565			8.54325	4.67766
				8.24089	1.22835			8.57121	4.47267
				8.26875	1.31353			8.59876	4.34015
				8.29597	1.6176			8.62591	4.50489
				8.32179	1.69309			8.65463	4.84681
				8.34774	1.76389			8.68346	4.72791
				8.37419	1.79227			8.71065	4.4626
				8.40115	2.00359			8.73728	4.4266
				8.42898	2.11228			8.76394	4.72633
				8.45722	2.04628			8.79125	4.89427
				8.48544	1.77761			8.81925	4.61005
				8.51416	1.61986			8.84831	4.4587
				8.54376	1.63668			8.87779	4.64741
				8.57375	1.52397			8.9073	4.81286
				8.60563	1.42738			8.93851	4.59299
				8.63776	1.3424			8.96919	4.27471
				8.66941	1.42832			9.00056	4.36785
				8.70088	1.43882			9.03346	4.69484
				8.73112	1.35754			9.06659	4.67131
				8.76019	1.20389			9.09813	4.41782
				8.78838	1.30214			9.1299	4.39201
				8.81527	1.44669			9.15956	4.6746
				8.84179	1.39868			9.19041	4.61929
				8.86767	1.44623			9.21898	4.68318
				8.89286	1.46798			9.24591	4.65401
				8.91787	1.56142			9.27353	4.8247
				8.94391	1.67291			9.30125	5.1238
				8.96959	1.56536			9.32782	5.20654
				8.9957	1.50411			9.35458	5.00003
				9.02183	1.45			9.38186	4.75239
				9.0484	1.61007			9.40982	4.98218
				9.07612	1.82078			9.43732	5.20778
				9.1045	1.83778			9.4655	5.37098
				9.13241	1.73778			9.49378	5.14376
				9.15824	1.8948			9.52215	5.3202
				9.18322	2.01987			9.55093	5.59488
				9.2099	1.88472			9.5798	5.50742
				9.23746	1.94686			9.60779	5.21099
				9.26497	2.01282			9.63367	5.20455
				9.29415	2.26345			9.65939	5.51081
				9.32386	2.20224			9.68683	5.4355
				9.35263	1.87672			9.71596	5.22144
				9.38178	1.81309			9.74699	4.95166
				9.41203	1.94363			9.77855	5.20876
				9.44386	1.92381			9.80974	5.37001
				9.47577	1.86351			9.84108	5.19622
				9.50647	1.75903			9.87373	4.95073
				9.53646	1.53828			9.90639	4.90322
				9.56614	1.52607			9.93936	5.182
				9.59569	1.53502			9.97153	5.28602
				9.6235	1.56665			10.0028	5.32182
				9.65054	1.6308			10.0331	5.18111
				9.67663	1.78322			10.063	5.40601
				9.70217	2.03012			10.0912	5.50732
				9.72811	2.1054			10.1183	5.50572
				9.75445	2.00539			10.1449	5.37672
				9.78005	2.04618			10.1715	5.44333
				9.80641	2.38365			10.199	5.7752
				9.83281	2.43566			10.2256	5.78674
				9.85897	2.08594			10.2517	5.48945
				9.88633	1.94875			10.2789	5.2204
				9.91485	2.13894			10.3067	5.36015
				9.94239	2.46583			10.3354	5.44189
				9.96901	2.38108			10.3643	5.38436
				9.99475	2.10221			10.3931	4.94916
				10.0208	2.00231			10.4218	5.1399
				10.0478	2.24036			10.4488	5.35981
				10.0752	2.11911			10.4755	5.2336
				10.1042	1.86427			10.5022	4.99411
				10.1345	2.16514			10.5291	4.87061
				10.1645	2.48789			10.5569	5.0826
				10.1946	2.65523			10.5861	5.28321
				10.2247	2.39857			10.617	5.33279
				10.2549	2.12905			10.6481	5.15156
				10.2853	2.28851			10.6792	5.4761
				10.316	2.54327			10.711	5.50723
				10.346	2.38435			10.7436	5.59717
				10.3758	2.22163			10.7766	5.43236
				10.4047	2.37432			10.8101	5.34118
				10.4332	2.44956			10.8425	5.53352
				10.4601	2.5286			10.8739	5.78147
				10.4861	2.32329			10.9046	5.57531
				10.5127	2.25247			10.9343	5.14088
				10.5395	2.3808			10.963	5.19438
				10.5649	2.65792			10.9897	5.29793
				10.5898	2.6806			11.0168	5.41086
				10.6145	2.50373			11.0441	4.99542
				10.6407	2.4838			11.0705	4.86143
				10.6675	2.68873			11.0968	5.07834
				10.6951	2.78309			11.1239	5.34947
				10.7232	2.45971			11.1523	5.12055
				10.7515	2.23886			11.1807	4.94338
				10.7789	2.27185			11.2085	5.1003
				10.8056	2.32466			11.2366	5.25478
				10.8322	2.10986			11.2649	5.16642
				10.8596	1.65665			11.2945	4.95277
				10.8883	1.78663			11.3225	5.16876
				10.917	2.16078			11.3491	5.64073
				10.9456	2.22224			11.3753	5.8207
				10.9755	1.99201			11.402	5.47067
				11.0057	1.91818			11.4309	5.23328
				11.0351	2.18956			11.4605	5.4207
				11.0648	2.28437			11.4905	5.72783
				11.0961	2.16748			11.5208	5.50863
				11.1275	2.01622			11.5517	5.34533
				11.159	2.32667			11.5825	5.32907
				11.1896	2.54907			11.6139	5.56314
				11.2193	2.44184			11.6472	5.48339
				11.2479	2.20944			11.6811	5.15188
				11.2761	2.14522			11.7134	5.04769
				11.3026	2.35106			11.7448	5.19633
				11.3284	2.3096			11.7752	5.30087
				11.3546	2.07077			11.8047	5.18085
				11.3803	1.96476			11.8331	5.23747
				11.4057	2.00667			11.8606	5.40944
				11.4316	2.10404			11.8871	5.73639
				11.4576	2.10156			11.9129	5.47918
				11.4836	1.8976			11.9391	5.23545
				11.5103	1.69431			11.9653	5.20022
				11.5375	1.85749			11.9921	5.4525
				11.5647	2.04277			12.0204	5.64264
				11.5939	2.12159			12.0481	5.56031
				11.6213	2.05395			12.0756	5.33855
				11.6479	2.30979			12.1045	5.47781
				11.6738	2.5721			12.1344	5.66112
				11.7011	2.63029			12.1633	5.50065
				11.7284	2.38523			12.1912	5.47241
				11.7553	2.49092			12.2186	5.43245
				11.7836	2.87766			12.2458	5.6857
				11.8133	2.88263			12.2728	5.78661
				11.8436	2.68955			12.3007	5.65024
				11.8744	2.50967			12.3292	5.58608
				11.906	2.59628			12.359	5.70685
				11.9383	2.5823			12.3893	5.59231
				11.9707	2.47733			12.42	5.3577
				12.0026	2.09598			12.4504	5.19806
				12.0325	2.02932			12.4811	5.32919
				12.0605	1.99893			12.5132	5.55811
				12.0884	2.09223			12.5451	5.5148
				12.1152	2.08973			12.5774	5.34768
				12.1385	1.97203			12.6098	5.26036
				12.1592	2.1543			12.642	5.32242
				12.1807	2.47834			12.6729	5.4846
				12.2038	2.49468			12.702	5.63806
				12.2277	2.32302			12.7292	5.58148
				12.2535	2.28198			12.756	5.67362
				12.2855	2.29388			12.7828	5.70395
				12.3241	2.5894			12.8101	5.70467
				12.3587	2.52982			12.837	5.73807
				12.3891	2.28236			12.8632	5.79077
				12.4171	2.38587			12.8903	5.874
				12.4436	2.57405			12.9177	5.90956
				12.4698	2.58686			12.9441	5.83794
				12.4956	2.28997			12.9718	5.67513
				12.5207	2.11164			13.0005	5.69234
				12.5464	2.44517			13.03	5.74683
				12.5724	2.70016			13.0581	5.63509
				12.5992	2.40897			13.1679	5.75564
				12.6274	2.08614			13.2574	5.69195
				12.6572	2.24025			13.3494	5.96156
				12.6871	2.43755			13.4462	6.35902
				12.7169	2.28809			13.5378	6.00498
				12.7471	1.72684			13.6474	6.07974
				12.7789	1.65089			13.7562	5.8612
				12.8112	1.95087			13.868	5.50833
				12.8432	1.96112			13.9803	5.51346
				12.8739	1.82664			14.0969	5.9262
				12.9038	1.80726			14.189	5.9192
				12.9324	2.00573			14.2847	5.71023
				12.9601	2.24053			14.3757	5.68208
				12.9869	2.07919			14.4883	5.7266
				13.0128	1.80418			14.5947	5.90543
				13.0382	2.10712			14.7085	5.78144
				13.0626	2.32574			14.7957	6.00667
				13.0872	2.34713			14.9042	6.10704
				13.1126	2.35184			14.9927	6.72572
				13.1385	2.26465			15.1017	6.49809
				13.1647	2.31869			15.2026	7.07995
				13.191	2.46584			15.2993	6.52184
				13.2177	2.23534			15.4023	6.73244
				13.2458	1.92262			15.5052	6.66127
				13.2742	1.77895			15.6143	6.82865
				13.3018	1.89053			15.721	6.90736
				13.3281	1.90893			15.837	6.50879
				13.3533	1.6811			15.934	6.05043
				13.3792	1.45174			16.0341	6.00208
				13.4062	1.6526			16.1249	6.37966
				13.4334	1.81174			16.234	6.92901
				13.4586	1.70428			16.3385	7.05608
				13.4823	1.56563			16.448	6.62999
				13.5059	1.78261			16.5513	6.54172
				13.5304	2.26104			16.6482	7.07034
				13.5559	2.69332			16.7427	7.0875
				13.5836	2.67275			16.8781	6.73687
				13.6147	2.51751			16.9882	6.69874
				13.7273	2.35065			17.0882	6.75894
				13.813	2.25234			17.1875	6.72635
				13.9148	1.94662			17.2949	6.90382
				14.0097	2.30161			17.4055	7.16746
				14.1156	2.39748			17.514	7.03822
				14.2176	2.5279			17.6053	7.02885
				14.3278	2.77187			17.7	7.11318
				14.4172	2.52701			17.7986	6.9153
				14.5119	1.79709			17.8905	6.51577
				14.603	2.02286			17.9926	6.55411
				14.7101	2.03244			18.082	6.84132
				14.8127	2.30709			18.1928	7.40166
				14.9147	2.54818			18.3024	7.51033
				15.0029	2.86153			18.3981	6.93269
				15.0895	2.93614			18.5133	6.73306
				15.2036	3.18734			18.6069	6.91725
				15.3018	2.56993			18.7	7.33038
				15.3883	2.57076			18.8123	7.67296
				15.4989	2.36257			18.9167	8.04669
				15.5977	2.92824			19.0262	7.80484
				15.7049	3.36642			19.138	7.47145
				15.8106	3.56575			19.2479	7.83005
				15.9156	3.03446			19.3394	7.69879
				16.013	2.33474			19.4348	7.61282
				16.1044	2.45696			19.5272	7.41977
				16.1966	2.85194			19.6199	7.74092
				16.2821	2.74172			19.7304	8.06129
				16.3868	3.10474			19.8391	7.79912
				16.4918	2.68902			19.9522	7.5279
				16.6011	2.52474			20.0587	7.84285
				16.7054	2.70232			20.1483	8.00437
				16.8177	3.0454			20.2425	8.19763
				16.9098	2.59301			20.3414	7.69676
				17.0063	2.67191			20.4342	7.44748
				17.0937	2.87894			20.5448	7.67798
				17.2011	2.67519			20.6537	7.51319
				17.3065	2.50981			20.7656	7.37338
				17.4148	2.35057			20.8769	7.64931
				17.5218	2.30621			20.9896	7.55202
				17.6308	2.70761			21.0848	7.34416
				17.7172	2.82064			21.1822	7.43459
				17.8113	2.98677			21.2769	7.16849
				17.9032	2.5549			21.3909	7.49978
				17.9882	2.32026			21.4971	7.79083
				18.0929	2.67933			21.6101	8.02947
				18.1971	2.95435			21.7227	8.24046
				18.3086	3.06366			21.8313	8.46791
				18.4138	2.73161			21.9216	8.14023
				18.5251	2.49439			22.0164	7.80387
				18.6167	2.27039			22.1134	7.80096
				18.7108	2.27942			22.2039	7.97819
				18.8005	2.43778			22.3126	8.39388
				18.9061	2.66307			22.4217	8.38343
				19.0083	2.83761			22.536	8.11154
				19.1178	2.54278			22.6455	7.91911
				19.2238	2.38233			22.7599	7.69659
				19.335	2.80077			22.8519	8.17052
				19.4227	2.59284			22.9497	8.15941
				19.5173	2.65044			23.0438	8.10327
				19.6075	2.65578			23.1552	8.0581
				19.7156	3.10918			23.2625	7.74929
				19.8183	3.07452			23.3726	8.23957
				19.926	2.85027			23.4857	8.45483
				20.0353	3.16997			23.5974	8.91183
				20.1424	3.38798			23.688	8.71271
				20.233	3.57726			23.7848	8.48041
				20.3251	3.44186			23.8804	8.66203
				20.4157	3.00755			23.9679	8.44807
				20.4998	2.74402			24.0741	8.389
				20.604	2.66543			24.183	8.35411
				20.7086	2.88019			24.2967	8.6339
				20.8192	2.95915			24.407	9.01633
				20.9257	3.2398			24.4958	9.14816
				21.0138	3.53097			24.5888	9.11529
				21.1037	3.47139			24.6852	8.57196
				21.199	2.79084			24.7769	8.60762
				21.2884	2.78554			24.8891	8.82221
				21.3932	3.05349			24.9951	9.06113
				21.4972	3.33532			25.1057	9.04649
				21.6052	3.24075			25.1937	9.20389
				21.7133	3.46739			25.2986	8.96379
				21.8236	3.26366			25.3976	8.84915
				21.915	2.71217			25.4958	8.6173
				22.0123	2.47053			25.5926	8.57153
				22.1032	2.68454			25.6795	8.79547
				22.2103	3.35748			25.7862	9.22908
				22.3108	3.67704			25.8952	9.27339
				22.4176	3.35751			26.0085	9.1377
				22.5025	3.19346			26.1182	8.74826
				22.6065	3.09432			26.2359	8.91195
				22.6925	3.14385			26.3346	8.68287
				22.7841	2.95275			26.4349	8.78775
				22.8809	3.04645			26.5248	8.84498
				22.9709	3.13619			26.6317	8.94556
				23.0751	3.28251			26.7349	8.96728
				23.1765	3.16117			26.8472	8.77648
				23.286	3.21008			26.936	8.79894
				23.3926	3.34666			27.0477	9.09758
				23.5027	3.59459			27.1372	9.65116
				23.591	3.50096			27.2361	9.5695
				23.6862	3.30656			27.3347	8.96503
				23.7791	3.15203			27.4232	8.70306
				23.8636	3.08398			27.5281	8.61904
				23.965	3.44579			27.6338	8.93388
				24.0685	3.62221			27.7478	9.30799
				24.1751	3.72778			27.8588	9.70024
				24.2819	3.82344			27.946	9.52814
				24.3683	3.7936			28.0371	9.42635
				24.4571	3.45559			28.1355	9.42669
				24.5526	3.10558			28.232	9.32867
				24.6433	2.93698			28.3451	9.51744
				24.7502	3.5413			28.4505	9.42571
				24.8539	3.77494			28.5588	9.56109
				24.9627	3.6215			28.6672	9.81546
				25.0665	3.20372			28.7806	9.74571
				25.1766	3.70715			28.8727	9.59802
				25.2665	3.62136			28.9689	9.59552
				25.3584	3.61172			29.0649	9.70381
				25.4492	3.73269			29.1549	9.95439
				25.5333	3.74466			29.2637	9.77106
				25.6368	4.07204			29.3712	9.84576
				25.7447	3.98933			29.4841	9.50797
				25.8536	4.14364			29.5913	9.68777
				25.9579	3.79192			29.68	9.86798
				26.0471	4.10471			29.7729	9.87017
				26.1379	3.76289			29.868	9.82958
				26.2331	3.52462			29.9618	9.41328
				26.3212	3.65887			30.0767	9.43974
				26.4274	3.74299			30.1843	9.53551
				26.5303	4.33186			30.295	9.56523
				26.6398	4.06877			30.407	10.0875
				26.7453	4.23701			30.519	10.4265
				26.8592	3.98125			30.6118	10.5737
				26.9491	4.17588			30.7091	9.977
				27.0439	3.73784			30.8047	9.82209
				27.1342	3.45318			30.8924	9.51607
				27.2403	3.38901			30.9996	9.57011
				27.3446	3.66819			31.109	9.70852
				27.4557	3.78082			31.1962	9.66044
				27.5622	4.02793			31.3036	9.60734
				27.6719	3.91046			31.3912	9.71217
				27.7602	3.57717			31.4843	9.54409
				27.8525	3.79455			31.582	9.3354
				27.9448	3.69869			31.6767	9.26488
				28.0544	4.05666			31.7898	9.4951
				28.1581	4.25166			31.8972	9.98705
				28.266	4.28081			32.0113	9.64937
				28.3733	3.77858			32.1242	9.43617
				28.4796	3.52061			32.2333	9.16446
				28.5675	3.67443			32.3238	9.48571
				28.6569	3.72394			32.419	9.60984
				28.7504	4.10185			32.5159	9.60983
				28.8384	4.15296			32.6065	9.66587
				28.9453	3.98199			32.713	9.86483
				29.0475	3.62405			32.8223	9.99009
				29.1564	3.50749			32.9358	9.93145
				29.2612	3.67014			33.0449	9.89757
				29.3746	4.12161			33.1608	10.2529
				29.463	4.23734			33.2525	10.0057
				29.5572	4.04434			33.3504	9.72071
				29.6471	3.68188			33.4439	9.17881
				29.7561	3.91034			33.5558	8.93281
				29.8596	4.24803			33.6625	8.93183
				29.9666	4.25695			33.7729	9.31796
				30.0744	4.32027			33.885	10.0942
				30.1832	4.65295			33.9976	10.4963
				30.2725	4.19761			34.0885	10.3176
				30.3659	4.26178			34.1853	10.0234
				30.4566	4.26101			34.2799	9.94192
				30.5661	4.31853			34.3686	9.96051
				30.67	4.34481			34.4763	10.312
				30.7759	4.48124			34.5843	10.2066
				30.8863	4.59998			34.6981	10.3567
				30.9948	4.39551			34.8075	10.1333
				31.0828	4.11591			34.8974	10.3099
				31.1778	3.79025			34.9905	9.9555
				31.272	4.14802			35.0869	9.81257
				31.3564	4.44018			35.1786	10.3039
				31.4588	4.65129			35.2892	10.7332
				31.5634	4.63892			35.3955	10.9864
				31.6742	4.10838			35.5077	10.8659
				31.7801	3.87007			35.6196	10.6396
				31.8648	4.15039			35.7372	10.5216
				31.9577	4.41215			35.8298	10.4079
				32.0532	4.00628			35.9301	10.6561
				32.1435	3.69349			36.0235	10.4301
				32.2505	3.75589			36.135	10.3473
				32.3514	4.00149			36.2405	10.6573
				32.451	4.22407			36.3528	9.95164
				32.5402	4.38079			36.4658	10.1836
				32.6487	4.7499			36.5764	10.872
				32.7331	4.73934			36.6701	11.1107
				32.8258	4.61174			36.7701	10.734
				32.9233	3.9253			36.8656	10.1633
				33.0117	3.76663			36.9797	10.4498
				33.1145	3.95406			37.0863	10.8018
				33.2174	4.27167			37.1937	11.0946
				33.327	4.48719			37.3054	11.3726
				33.4334	4.47255			37.4165	11.3088
				33.5434	4.36783			37.5078	10.8839
				33.6325	4.03724			37.6061	10.8282
				33.7269	4.30416			37.7058	10.3625
				33.8261	4.6933			37.7961	10.2528
				33.9115	4.53807			37.902	10.6842
				34.0161	4.42534			38.0088	11.482
				34.1173	4.0573			38.1217	11.4761
				34.2213	4.62913			38.2312	10.8989
				34.3258	4.45094			38.3454	10.9321
				34.4115	4.47325			38.4368	11.1043
				34.5006	4.43664			38.5375	11.0468
				34.5933	4.50195			38.6344	11.3806
				34.6855	4.46361			38.7464	11.2367
				34.7904	4.41348			38.8499	11.1927
				34.8921	4.51759			38.9596	10.921
				35.0012	4.15667			39.0691	11.0558
				35.104	4.00986			39.1829	11.3043
				35.196	5.00439			39.2737	11.1816
				35.2874	4.92917			39.3684	11.2123
				35.4094	4.88887			39.4637	11.2907
				35.5033	4.3574			39.5551	10.9636
				35.6052	4.35833			39.6636	11.0813
				35.7081	4.45495			39.772	11.0324
				35.8143	4.34691			39.8858	10.8451
				35.9188	4.63542			39.9923	11.2982
				36.0296	4.7142			40.0807	11.3395
				36.1208	4.53425			40.1723	11.5365
				36.2137	4.14843			40.2698	11.5634
				36.3022	3.94093			40.3622	11.0267
				36.4092	3.76063			40.4759	10.74
				36.5096	4.11514			40.5849	10.6595
				36.6171	4.18796			40.6977	11.117
				36.7053	4.54095			40.8064	11.2986
				36.8112	4.67349			40.9221	11.4088
				36.8999	4.34465			41.0143	11.0885
				36.9983	4.16115			41.1108	10.581
				37.089	4.15942			41.2045	11.363
				37.1775	4.66984			41.3172	11.6256
				37.2786	5.00208			41.4273	12.1305
				37.3869	4.95085			41.5372	11.78
				37.473	4.44677			41.6477	11.6188
				37.5784	4.06248			41.7616	11.0428
				37.6836	4.36477			41.8554	11.2473
				37.7702	4.89905			41.9555	11.7016
				37.8633	5.12257			42.0515	11.8426
				37.9584	4.87505			42.1634	11.9187
				38.0433	4.63853			42.2701	11.7334
				38.1454	4.28374			42.3828	11.5128
				38.251	4.23923			42.4702	11.1997
				38.3608	4.24208			42.576	11.6776
				38.4664	4.49801			42.6638	12.1324
				38.579	5.10996			42.7557	12.0904
				38.6672	4.60428			42.8553	11.7973
				38.7613	4.43617			42.9507	11.3106
				38.8523	4.19579			43.0615	11.405
				38.9582	4.54986			43.1668	11.4798
				39.0615	4.6901			43.2786	11.612
				39.1679	4.70281			43.3918	12.0783
				39.2766	4.73532			43.5028	12.4078
				39.3879	4.89125			43.5916	12.11
				39.4753	4.7243			43.6873	11.8244
				39.5667	4.43828			43.7853	11.9102
				39.6587	4.33479			43.8751	11.6368
				39.7434	4.32432			43.9832	11.8835
				39.8473	5.03245			44.0898	12.1631
				39.9507	5.31982			44.2034	12.147
				40.0611	5.56932			44.3143	11.8572
				40.1669	4.8302			44.4308	11.8864
				40.253	4.73678			44.5228	12.0388
				40.3442	4.23645			44.6183	12.0766
				40.4367	4.31686			44.7107	12.3745
				40.523	4.51807			44.8224	12.5173
				40.632	4.79336			44.9293	12.2802
				40.7368	4.99526			45.0413	12.455
				40.8454	4.80276			45.1534	12.0566
				40.9518	4.57373			45.2678	12.6333
				41.0629	4.77351			45.3607	12.2722
				41.1558	4.83676			45.4557	12.566
				41.2515	4.71209			45.5474	12.5811
				41.3397	5.13269			45.6607	12.4117
				41.4464	4.99737			45.7691	12.4327
				41.55	5.05139			45.8802	12.332
				41.6556	4.47973			45.9934	12.26
				41.7418	4.75808			46.1069	12.4879
				41.8464	5.34911			46.2008	12.5028
				41.9352	5.68221			46.3002	12.2991
				42.0298	5.25065			46.3946	12.0579
				42.1237	4.71554			46.5067	11.7795
				42.2095	4.92855			46.6131	11.8475
				42.3129	5.24809			46.7229	12.5165
				42.4159	5.37794			46.8325	12.757
				42.5285	5.37108			46.9483	12.4083
				42.6343	5.3486			47.0423	11.8057
				42.7454	5.0754			47.1408	11.7286
				42.8354	5.04154			47.2371	11.7056
				42.9322	5.16747			47.3257	11.6966
				43.0234	4.88594			47.4311	11.805
				43.1286	5.31287			47.5379	12.0082
				43.2291	5.34037			47.6258	12.1423
				43.3368	5.26829			47.737	12.2495
				43.4457	4.70701			47.8482	12.2471
				43.5532	5.06375			47.9387	12.0362
				43.6411	5.20711			48.0405	11.8974
				43.7347	5.12722			48.1376	12.1403
				43.8299	5.23061			48.2497	12.5756
				43.9162	4.79692			48.3524	12.4136
				44.0194	4.81459			48.4655	11.9552
				44.1209	4.65196			48.5763	11.9514
				44.2298	5.05055			48.6881	12.3148
				44.3352	5.63658			48.7778	12.4575
				44.4203	5.86419			48.87	12.3118
				44.5094	5.5397			48.9707	12.0125
				44.6028	5.23536			49.0642	11.8498
				44.6951	5.35211			49.1706	12.301
				44.8035	5.38515			49.2759	12.5361
				44.9058	5.31624			49.3888	12.5299
				45.0133	5.1667			49.4972	12.521
				45.1188	5.35934			49.5848	12.3179
				45.2293	5.56317			49.6762	12.5945
				45.3186	5.64474			49.7714	12.5114
				45.4093	5.27761			49.8675	12.0394
				45.4994	4.86181			49.9569	12.2275
				45.5835	4.86316			50.0645	12.2827
				45.6903	5.15435			50.1714	12.9394
				45.7975	5.5227			50.2847	13.0489
				45.9059	5.45459			50.3926	12.7793
				46.0075	5.04229			50.4812	12.3712
				46.0978	5.04775			50.574	12.1022
				46.1907	4.90028			50.6713	12.4399
				46.285	5.16164			50.7633	12.3608
				46.3727	5.44839			50.8759	12.7382
				46.4786	5.5736			50.9837	12.7301
				46.586	5.78937			51.096	12.4342
				46.695	5.25335			51.2056	12.7841
				46.7985	5.19616			51.3211	13.0059
				46.9108	5.41955			51.4157	13.0628
				47.0001	5.45642			51.5142	12.6532
				47.095	5.60821			51.6071	12.9921
				47.1855	5.51786			51.7191	12.7917
				47.2938	5.32263			51.8286	12.7788
				47.3975	5.17872			51.9431	12.7443
				47.5066	4.74395			52.0508	12.7747
				47.6124	5.34107			52.1622	12.8928
				47.721	5.42607			52.2556	13.0943
				47.8102	5.63403			52.3525	13.3734
				47.9026	5.57675			52.4492	13.0966
				47.9959	5.18804			52.5364	12.7992
				48.0811	5.08081			52.6442	12.4273
				48.1846	4.94436			52.755	12.6387
				48.2903	5.52198			52.8673	12.9992
				48.4024	5.67222			52.9756	13.3182
				48.5062	5.71774			53.0928	13.2919
				48.6177	5.63547			53.1891	12.6932
				48.7084	5.41457			53.288	12.815
				48.8031	5.35322			53.379	13.0762
				48.8915	5.20581			53.4868	13.2761
				48.9975	5.79166			53.5944	13.3755
				49.1006	5.87066			53.7097	13.2605
				49.2079	5.50135			53.8209	13.3261
				49.3163	5.04678			53.9343	13.0797
				49.4262	5.32271			54.0249	12.968
				49.5144	5.2646			54.1223	12.7294
				49.6059	5.52199			54.2171	12.9115
				49.697	5.4871			54.3284	13.3874
				49.8044	5.50693			54.435	13.4068
				49.9069	5.60155			54.5474	13.1855
				49.9922	5.16536			54.6588	12.7257
				50.077	5.47656			54.7699	13.2755
				50.1803	5.26108			54.8598	13.2695
				50.2652	5.9032			54.9556	13.6226
				50.3564	5.79614			55.05	13.3029
				50.4477	5.10863			55.1406	12.7686
				50.5368	5.58077			55.2478	12.7282
				50.6444	5.35974			55.3576	12.7134
				50.7474	5.89765			55.4719	12.9017
				50.8556	5.93476			55.5815	13.1419
				50.9396	6.29796			55.6693	13.4686
				51.0462	6.2007			55.7634	13.3562
				51.1365	6.33882			55.8598	13.3061
				51.2291	6.04651			55.9503	13.4718
				51.3222	5.51486			56.0618	13.1715
				51.4084	5.59549			56.1688	13.3795
				51.5103	5.61301			56.2807	13.4696
				51.6152	6.24758			56.3931	14.3314
				51.7247	6.12095			56.5081	13.9155
				51.8307	6.20669			56.6038	13.6089
				51.915	6.19793			56.7025	13.2817
				52.0077	6.28407			56.7963	13.0125
				52.1044	6.01133			56.9067	13.2733
				52.1961	5.77363			57.0133	13.5345
				52.3037	6.20055			57.124	13.8318
				52.4037	6.27901			57.2383	13.6084
				52.512	6.20707			57.3491	13.708
				52.6213	5.89019			57.4422	13.5573
				52.7272	5.95911			57.5409	13.8936
				52.8141	5.95484			57.6377	13.6773
				52.9095	5.89336			57.7261	13.2737
				53.0041	5.97139			57.8313	13.4195
				53.0913	6.02516			57.9386	13.6375
				53.1935	5.5336			58.0526	13.6986
				53.2973	5.56425			58.1644	13.6034
				53.4071	5.41104			58.2788	13.8621
				53.5112	5.90188			58.3769	13.9861
				53.5951	6.16848			58.4747	14.0555
				53.6838	6.13025			58.566	13.5979
				53.7782	6.22049			58.678	13.053
				53.872	5.48451			58.784	13.2242
				53.9565	5.36336			58.8968	13.6746
				54.0573	5.68103			59.0046	14.1141
				54.156	6.11517			59.1184	14.1485
				54.2429	6.28223			59.2106	14.1879
				54.3485	6.29404			59.3082	13.6158
				54.4609	6.22269			59.4061	13.33
				54.5513	6.1748			59.5188	13.7572
				54.644	5.87975			59.6238	14.1125
				54.7348	5.66899			59.7335	13.9716
				54.8417	6.12558			59.842	13.7916
				54.9449	6.39496			59.938	14.5496
				55.053	6.70906			60.0468	14.3726
				55.1574	6.05277			60.1399	14.3122
				55.2687	6.43356			60.2556	14.0029
				55.3583	5.6431			60.3652	13.491
				55.4637	5.82989			60.4675	13.7653
				55.5692	5.88857			60.575	13.8888
				55.6874	6.31507			60.6852	13.7846
				55.7721	6.2746			60.7945	13.1395
				55.87	5.89795			60.8828	13.0322
				55.9728	6.15318			60.9768	13.186
				56.0824	5.72215			61.0735	13.472
				56.1758	6.48481			61.1633	13.7806
				56.2695	6.29864			61.2715	14.285
				56.3591	6.03492			61.3802	14.3623
				56.4668	6.0181			61.4759	14.4207
				56.5731	6.00191			61.592	13.85
				56.6781	5.63967			61.6844	13.7492
				56.7839	5.93851			61.7988	13.7977
				56.8974	6.31233			61.8946	13.6269
				56.997	6.00519			61.9856	13.7396
				57.11	5.27657			62.0957	13.8119
				57.2149	5.13476			62.2024	13.8615
				57.3179	5.7639			62.3132	13.6923
				57.4149	5.99183			62.4234	13.811
				57.5237	6.51015			62.5337	14.1277
				57.632	6.06418			62.625	13.7928
				57.7333	6.13798			62.7233	13.63
				57.8213	6.06968			62.8287	13.3421
				57.9119	6.05184			62.918	13.6475
				58.0072	5.79703			63.0099	13.7495
				58.0954	5.6006			63.1124	13.981
				58.1996	6.37179			63.2233	13.9966
				58.2937	6.51689			63.328	13.9929
				58.4065	6.41437			63.4386	14.0708
				58.4919	5.77033			63.5282	14.0985
				58.5809	5.95059			63.6259	13.9908
				58.6932	6.33894			63.7217	14.0811
				58.7832	6.36414			63.8356	14.1383
				58.8761	6.07006			63.9398	14.2023
				58.9615	6.13056			64.0518	13.9888
				59.0639	6.26632			64.1405	14.2465
				59.1685	6.0819			64.2496	14.2743
				59.2788	6.17483			64.3604	14.7911
				59.3835	6.37198			64.4478	14.3924
				59.4964	6.52697			64.5568	14.0922
				59.5858	6.39593			64.6543	13.9751
				59.6789	6.13488			64.7596	13.5805
				59.7679	5.87747			64.8656	13.6635
				59.8739	5.82534			64.9776	13.4994
				59.978	6.13421			65.0874	14.2625
				60.0863	6.2773			65.2036	14.501
				60.1927	6.49388			65.2947	14.5012
				60.3056	6.40474			65.3907	13.9342
				60.3952	5.97825			65.4827	13.8225
				60.4869	5.70802			65.5959	13.9466
				60.5758	5.60737			65.7035	14.5121
				60.683	6.1399			65.8136	14.565
				60.7885	6.35783			65.9259	14.6386
				60.8973	6.62271			66.0418	14.2088
				61.0057	6.55995			66.1332	14.2754
				61.1159	6.57479			66.2266	13.9207
				61.2072	6.50671			66.3199	13.5265
				61.3022	5.93135			66.4342	13.7216
				61.3914	6.48072			66.5429	14.3171
				61.4958	6.08729			66.6533	14.6036
				61.6003	6.35107			66.7684	14.3072
				61.709	5.91847			66.8793	13.9802
				61.7931	5.85887			66.9738	13.8442
				61.9003	5.67664			67.0718	13.7714
				61.9883	6.01757			67.1651	14.0999
				62.0816	6.31193			67.2522	14.3848
				62.1765	6.20751			67.3593	14.6435
				62.2639	5.96552			67.4688	14.3781
				62.3666	5.63869			67.5821	14.3962
				62.4682	6.08666			67.6929	14.4901
				62.5796	6.1694			67.7809	14.5031
				62.685	6.39036			67.8765	14.484
				62.7948	6.63594			67.9763	14.7432
				62.8867	6.89955			68.0689	14.5729
				62.9836	6.50445			68.1788	14.4393
				63.0766	5.76375			68.282	14.5891
				63.1833	6.20132			68.3967	14.7727
				63.2823	6.47754			68.5095	14.9497
				63.3892	6.64708			68.6184	15.2474
				63.4978	6.42647			68.7114	15.0292
				63.6058	6.74882			68.8112	14.8911
				63.6925	6.69768			68.9074	14.3675
				63.7844	6.76194			68.9955	14.5107
				63.8807	6.69678			69.0986	14.7204
				63.9687	6.43038			69.2109	15.0327
				64.0695	6.86185			69.3254	15.3441
				64.1725	7.10281			69.4329	15.2197
				64.2817	6.93133			69.5503	15.1921
				64.3865	6.40289			69.642	14.7614
				64.4991	6.22545			69.7422	14.7777
				64.5908	6.51648			69.8359	14.644
				64.6847	6.84166			69.9441	15.0136
				64.7751	6.77915			70.048	15.2853
				64.8819	6.55515			70.1599	14.9809
				64.9855	6.47097			70.2699	14.6983
				65.0938	6.5554			70.3846	14.6858
				65.198	6.79013			70.477	14.8194
				65.3091	6.85261			70.5747	15.1051
				65.3982	6.55294			70.6697	15.191
				65.4921	6.35324			70.757	14.9721
				65.5809	6.34366			70.8639	15.0332
				65.6653	6.74699			70.9737	14.9912
				65.7696	6.9711			71.085	15.4055
				65.877	6.7951			71.194	15.3071
				65.9855	7.20971			71.2856	15.4385
				66.0888	7.33802			71.3789	15.1044
				66.1786	7.27478			71.4752	14.8257
				66.2723	6.86789			71.5657	14.8058
				66.3659	6.47776			71.677	14.7647
				66.4521	6.44195			71.7855	15.0295
				66.5572	6.56309			71.8998	15.0395
				66.6633	7.00118			72.0045	15.2055
				66.7732	7.41252			72.0929	15.3094
				66.8767	7.27273			72.186	14.7368
				66.9614	6.91569			72.2843	14.7098
				67.0508	6.83568			72.3783	14.7101
				67.1479	6.74139			72.4653	14.7086
				67.2397	6.37523			72.5742	14.9448
				67.3483	6.91551			72.6838	15.1032
				67.4497	7.09171			72.7713	15.2838
				67.5597	6.92718			72.877	15.1786
				67.6677	7.09067			72.9647	15.2007
				67.7726	7.22654			73.059	14.9149
				67.8609	6.96153			73.1592	15.175
				67.9519	6.73174			73.2532	15.2897
				68.0472	7.07724			73.3642	15.4496
				68.1335	7.07121			73.4715	15.439
				68.2397	7.13675			73.5856	15.1582
				68.3416	7.02368			73.6963	15.0618
				68.4265	6.78919			73.8065	15.2214
				68.5321	6.86265			73.898	15.5971
				68.6401	7.53872			73.9931	15.1343
				68.7275	7.55775			74.0901	15.1572
				68.8211	7.34771			74.1789	15.2652
				68.9146	6.93289			74.2866	15.3414
				68.9992	6.13636			74.3959	15.4513
				69.103	6.08577			74.4829	15.2957
				69.207	6.7102			74.5924	15.6436
				69.3182	7.11784			74.7043	15.8724
				69.4223	6.81995			74.7949	15.6363
				69.5073	7.28765			74.893	15.2917
				69.5962	6.64253			74.9891	15.1617
				69.6905	6.40481			75.0761	15.1362
				69.7793	6.89064			75.1825	15.2187
				69.886	7.11121			75.2918	15.2851
				69.9911	7.31635			75.4065	15.5308
				70.0992	6.9858			75.5146	15.5701
				70.2062	7.30884			75.6022	15.4476
				70.3142	7.31675			75.6967	15.2245
				70.4044	6.91558			75.7928	14.9302
				70.4971	6.73972			75.8835	15.1686
				70.5868	6.51178			75.9954	15.3917
				70.6955	6.74758			76.1028	15.8508
				70.8007	7.33635			76.2155	15.3908
				70.908	6.6724			76.3256	15.1434
				71.0177	6.77241			76.4408	15.067
				71.1253	6.77576			76.5337	15.606
				71.2164	7.24831			76.6276	15.584
				71.3114	6.66374			76.7211	15.6726
				71.4048	6.77486			76.8331	15.6004
				71.5145	6.71069			76.942	15.9742
				71.6168	6.7574			77.0539	15.6054
				71.722	6.81854			77.1673	15.6343
				71.8323	6.49134			77.2793	16.0227
				71.9403	6.86182			77.3724	15.9654
				72.028	7.20991			77.4724	16.1856
				72.1213	6.92547			77.5683	16.0223
				72.2175	6.08606			77.6793	15.8246
				72.3044	5.71835			77.7861	15.4381
				72.4071	6.1298			77.8966	15.3377
				72.5093	7.00472			77.9841	15.4714
				72.6174	7.0461			78.0946	16.1744
				72.725	7.1746			78.1832	16.8115
				72.8363	6.57648			78.2794	16.646
				72.9267	6.34083			78.3791	15.7645
				73.0245	6.03143			78.4713	15.7184
				73.1165	6.14928			78.58	15.7812
				73.222	6.79911			78.6846	16.2684
				73.3221	6.60556			78.7953	16.3848
				73.4296	7.05215			78.9077	16.3667
				73.5379	6.79855			79.0198	16.4151
				73.645	6.47574			79.1128	16.0014
				73.7324	6.47405			79.2124	16.0437
				73.8261	7.10459			79.3112	15.851
				73.9229	6.24433			79.3991	15.734
				74.0082	6.37469			79.502	16.1813
				74.1095	6.76641			79.6107	15.9524
				74.2121	6.70641			79.7236	16.1636
				74.3204	6.5891			79.8336	15.8687
				74.4266	7.10627			79.9495	16.397
				74.54	7.01399			80.0453	16.1891
				74.6322	6.57087			80.1444	16.1289
				74.7262	7.0039			80.2365	16.4529
				74.8164	6.65182			80.3449	16.2729
				74.9224	6.5183			80.4497	16.5349
				75.0254	6.68523			80.5602	16.4971
				75.1348	7.03411			80.6704	16.5377
				75.2371	6.99204			80.7858	16.3582
				75.3495	6.46368			80.8773	16.3471
				75.4408	6.08743			80.9781	16.326
				75.5334	5.80407			81.0721	16.4547
				75.6226	6.09853			81.1853	16.402
				75.7292	6.3458			81.2916	16.5171
				75.8177	6.99126			81.4027	15.8504
				75.9229	6.71613			81.5117	16.4068
				76.0352	7.1932			81.625	16.6552
				76.1417	6.57437			81.7182	16.7082
				76.228	6.9168			81.8137	16.2287
				76.3208	6.38192			81.9062	15.8292
				76.411	6.30981			81.995	16.1129
				76.5205	7.25459			82.1033	16.4455
				76.6242	7.45053			82.2151	16.7467
				76.73	7.69941			82.3268	16.0304
				76.8396	6.70007			82.4339	16.0214
				76.9429	6.52772			82.5246	16.2475
				77.0313	6.50175			82.6216	16.085
				77.121	7.01559			82.7204	15.8572
				77.2275	7.37388			82.8114	15.9852
				77.322	7.22451			82.9208	16.6995
				77.4151	6.96528			83.0284	16.851
				77.5023	7.09421			83.139	16.4971
				77.6083	6.83528			83.2507	15.8923
				77.7128	7.22418			83.3658	16.4422
				77.8182	7.54517			83.4594	16.2465
				77.9051	7.58134			83.5595	16.4353
				77.9959	7.61912			83.653	16.385
				78.0892	6.98561			83.7648	16.5095
				78.175	7.07421			83.8716	16.3022
				78.277	6.93017			83.9861	16.1742
				78.3808	7.13037			84.0995	16.4213
				78.4649	7.17371			84.2092	16.7314
				78.5679	7.72994			84.2992	17.1617
				78.6702	7.57463			84.3953	16.5235
				78.7629	7.50256			84.4926	16.1644
				78.8671	6.98891			84.5811	15.804
				78.9636	6.85033			84.6864	16.2366
				79.0687	7.49828			84.7938	16.6733
				79.1694	7.83876			84.8822	16.7
				79.2746	7.68297			84.9936	16.5122
				79.3837	7.24468			85.1013	16.2996
				79.4914	6.98734			85.2174	16.564
				79.5794	7.21136			85.3237	16.5341
				79.668	7.43919			85.4282	16.6706
				79.7593	7.60955			85.5352	16.9534
				79.8471	7.06149			85.6389	17.1838
				79.9523	7.76413			85.7493	17.0903
				80.0557	7.59822			85.8611	16.6401
				80.1655	7.56354			85.9762	16.7433
				80.2699	7.12601			86.0658	16.6362
				80.3579	7.41238			86.1616	17.0655
				80.447	7.07477			86.2559	17.1677
				80.5388	7.14111			86.3688	16.717
				80.6274	7.34155			86.4766	16.4051
				80.7348	7.13012			86.5857	15.8758
				80.8415	7.06526			86.6735	16.5271
				80.9484	7.11561			86.7828	16.6291
				81.0566	7.46872			86.8734	17.1157
				81.1682	7.48309			86.9669	16.6978
				81.2594	7.49632			87.062	16.4485
				81.3542	7.26564			87.1514	16.5854
				81.445	7.06408			87.2631	16.8192
				81.5533	7.01865			87.3695	16.5486
				81.6556	7.35991			87.4836	16.2867
				81.7618	7.44431			87.5953	16.7568
				81.8464	7.50195			87.7129	16.8818
				81.9516	7.76651			87.8101	16.5503
				82.038	7.74723			87.9069	16.0982
				82.1309	7.55109			87.9984	15.8208
				82.228	7.54622			88.1068	16.3482
				82.316	7.37243			88.2141	16.8799
				82.4211	7.8043			88.3264	16.8592
				82.5212	7.94413			88.4371	16.6133
				82.6314	7.56566			88.5528	16.9871
				82.7383	7.05406			88.6483	16.5613
				82.8486	7.19897			88.7469	16.5938
				82.9376	7.41774			88.8421	16.7858
				83.0326	7.71311			88.9529	17.1507
				83.1273	7.66863			89.0579	17.3347
				83.2371	7.45923			89.1681	16.9208
				83.3364	7.10864			89.28	16.6932
				83.4418	7.02383			89.3895	16.1826
				83.5502	7.06981			89.4843	16.1837
				83.6583	7.83787			89.5811	16.5192
				83.7437	7.7163			89.6802	16.6576
				83.8354	7.49731			89.7686	16.6683
				83.9327	7.69841			89.8763	16.5087
				84.0214	7.47037			89.984	16.4517
				84.1248	7.37191			90.0972	16.7361
				84.2261	7.32227			90.2072	16.7321
				84.3346	7.72386			90.3217	17.063
				84.4386	7.88537			90.4146	16.7755
				84.5468	7.84694			90.5134	16.5296
				84.6342	7.68816			90.6094	16.5389
				84.7306	7.01241			90.7183	16.2819
				84.823	7.08854			90.8229	16.6423
				84.9097	7.32209			90.933	16.9034
				85.0126	7.58509			91.0421	16.9693
				85.1192	7.15511			91.1569	16.9958
				85.2241	6.94429			91.2452	16.7107
				85.3317	7.01198			91.339	16.8639
				85.4207	7.72012			91.4382	16.9112
				85.5134	7.7198			91.5291	17.0564
				85.6069	7.55285			91.6363	17.4235
				85.6926	7.86934			91.7465	17.1413
				85.7964	7.99114			91.8345	17.1315
				85.9018	7.88211			91.9397	16.9296
				86.0091	7.76583			92.0566	17.1316
				86.112	8.23744			92.1504	16.9166
				86.2004	7.97478			92.2473	16.6512
				86.2946	8.01992			92.3384	17.1113
				86.3896	7.75056			92.45	17.2251
				86.4783	7.68987			92.559	16.9837
				86.5858	7.89511			92.6707	16.53
				86.6898	7.54213			92.7769	16.6194
				86.7981	7.63194			92.8642	16.9817
				86.9032	7.89526			92.9604	17.1804
				87.012	8.06332			93.0588	16.9132
				87.103	7.77014			93.1522	16.9853
				87.1971	7.60842			93.2642	16.9329
				87.2899	7.08897			93.3759	16.904
				87.3745	6.74703			93.4869	16.3933
				87.4778	6.90782			93.5984	16.3936
				87.5841	7.2902			93.7082	16.9992
				87.6937	7.60321			93.8004	17.2407
				87.7978	7.81137			93.8958	17.5157
				87.8828	8.08876			93.9926	16.8418
				87.9735	7.54459			94.0824	16.3802
				88.0678	7.55205			94.1908	16.5643
				88.1573	7.38685			94.302	16.7822
				88.266	7.13207			94.4154	17.3608
				88.3691	7.57965			94.523	17.3123
				88.4769	7.65637			94.6383	17.2328
				88.5825	7.06007			94.733	16.5007
				88.6908	7.07678			94.8298	16.555
				88.7796	6.96244			94.9229	16.6954
				88.8726	7.29078			95.0348	17.0716
				88.965	7.43848			95.1423	17.4588
				89.0503	7.40644			95.2555	17.2338
				89.1551	7.30687			95.3634	17.197
				89.2605	7.03543			95.4756	17.1752
				89.3711	7.36427			95.5667	17.1552
				89.4733	7.55927			95.6633	17.0902
				89.5593	7.50957			95.7599	17.3013
				89.6469	7.33054			95.8476	17.3796
				89.7419	7.18769			95.956	17.3906
				89.8324	6.82996			96.0651	17.1051
				89.9396	7.08661			96.1799	17.2572
				90.0426	7.08265			96.287	16.9381
				90.1517	7.56414			96.3745	17.461
				90.2596	7.80299			96.4667	17.412
				90.3678	8.16647			96.5643	17.0136
				90.4568	7.98588			96.6569	16.9001
				90.5495	7.41279			96.7692	16.7245
				90.6409	7.32571			96.8761	17.0112
				90.7508	7.4563			96.9884	17.0046
				90.8531	7.65465			97.1013	17.3375
				90.9598	7.84054			97.2132	17.2519
				91.0447	7.99327			97.305	17.2423
				91.1512	8.2679			97.4013	17.4135
				91.2392	7.92512			97.4948	16.8574
				91.33	7.15343			97.5823	16.9332
				91.4257	7.08859			97.688	17.5942
				91.5132	7.39			97.7982	18.0335
				91.6178	8.42496			97.8857	17.7862
				91.719	8.48374			97.995	17.6425
				91.8272	7.71119			98.0822	17.585
				91.9366	7.33625			98.1784	17.6889
				92.0487	7.25281			98.2768	17.4999
				92.1407	7.66972			98.3708	16.9841
				92.2346	7.85773			98.4817	17.2854
				92.3262	7.35849			98.5863	17.378
				92.4346	7.33228			98.6948	17.3816
				92.5352	7.18919			98.7832	17.2299
				92.643	7.71313			98.895	17.0219
				92.7508	7.58533			98.9859	17.3309
				92.8602	8.09142			99.081	17.3128
				92.9475	7.8291			99.1796	17.3649
				93.0434	7.79045			99.2709	17.022
				93.1382	7.87249			99.3783	16.8787
				93.2244	7.11066			99.4855	17.0696
				93.3278	7.11995			99.5983	17.5171
				93.4291	7.59654			99.709	17.8129
				93.5363	7.87051			99.8249	17.9979
				93.6426	8.09395			99.9185	17.4995
				93.7268	8.0388			100.017	17.0189
				93.8165	7.32437			100.112	16.7108
				93.9112	7.29263			100.2	16.3149
				94.0035	7.39446			100.303	16.6263
				94.1126	7.94885			100.41	16.942
				94.2157	8.11			100.524	17.2397
				94.3184	7.8564			100.634	17.3049
				94.4251	7.3747			100.723	17.5555
				94.5342	7.35273			100.817	17.1494
				94.6229	7.63305			100.916	16.9678
				94.7153	7.60269			101.009	17.1946
				94.8067	7.35019			101.119	17.4091
				94.8957	7.69778			101.224	17.5758
				94.9996	7.61128			101.334	17.6702
				95.1045	7.59502			101.443	17.4928
				95.2134	7.75855			101.558	17.119
				95.3166	7.64044			101.65	17.497
				95.4013	7.81342			101.745	17.4683
				95.4911	7.41278			101.84	17.5456
				95.5846	7.45427			101.934	17.6031
				95.6735	7.73596			102.039	17.3081
				95.7832	7.71567			102.148	17.3211
				95.8871	7.67631			102.259	17.0818
				95.9959	7.55134			102.368	17.193
				96.1024	7.77341			102.459	17.2421
				96.2113	7.8045			102.553	17.8589
				96.3011	7.88302			102.649	17.4212
				96.3952	7.76633			102.74	17.1394
				96.488	7.3366			102.849	17.0402
				96.5973	7.50571			102.958	17.1643
				96.7019	7.67553			103.071	17.3107
				96.8097	7.95997			103.169	17.9643
				96.9192	8.12979			103.288	18.3777
				97.024	8.00985			103.398	17.8419
				97.113	7.76792			103.497	17.2649
				97.2066	7.02151			103.586	17.2582
				97.2994	7.24763			103.693	17.4639
				97.3839	7.7921			103.804	17.8381
				97.4853	8.09655			103.916	18.0423
				97.5975	7.95306			104.025	17.8292
				97.7089	7.6636			104.139	17.9355
				97.8138	7.78092			104.231	17.6989
				97.9265	7.6292			104.33	17.8116
				98.0139	7.90567			104.426	17.3624
				98.109	7.85326			104.538	17.4769
				98.1983	7.80161			104.63	17.9872
				98.3061	8.00295			104.743	18.0292
				98.407	7.84734			104.848	18.1381
				98.5161	7.81759			104.937	17.4957
				98.6246	8.3312			105.047	17.4118
				98.7342	8.01954			105.138	17.7754
				98.8435	8.26663			105.233	18.0187
				98.9573	7.62814			105.326	17.8722
				99.0673	7.65774			105.435	17.9724
				99.1541	7.83588			105.541	18.0299
				99.2521	8.16757			105.654	17.9266
				99.3568	8.12385			105.768	18.283
				99.4644	8.06638			105.879	18.6181
				99.5718	8.00774			105.97	18.859
				99.6588	7.94322			106.058	18.5375
				99.7517	7.78142			106.169	18.6198
				99.8417	7.3144			106.267	17.9241
				99.9265	7.47299			106.37	17.5224
				100.032	8.19975			106.475	17.6742
				100.135	8.41456			106.585	18.5578
				100.244	8.44238			106.692	18.6511
				100.35	7.95223			106.809	18.5864
				100.439	7.11297			106.9	18.5884
				100.53	7.11031			106.995	18.1052
				100.623	7.42951			107.087	18.155
				100.708	7.25585			107.197	18.3199
				100.817	7.67119			107.305	18.6266
				100.92	7.80828			107.418	18.5529
				101.03	7.97944			107.528	18.5928
				101.137	7.98178			107.616	18.1922
				101.249	8.31829			107.708	18.1286
				101.34	8.04867			107.804	17.9981
				101.434	7.75914			107.895	18.1362
				101.524	7.79261			108.008	18.1451
				101.631	7.42973			108.117	18.5933
				101.735	7.48665			108.228	18.7153
				101.841	7.43087			108.316	18.326
				101.925	7.86654			108.423	18.2052
				102.03	7.95553			108.516	17.7923
				102.119	8.16113			108.612	17.8842
				102.213	7.36574			108.708	17.6337
				102.308	7.55628			108.799	17.5124
				102.395	7.49596			108.905	17.6656
				102.498	7.59183			109.016	17.8692
				102.601	7.87192			109.126	17.9925
				102.712	7.90218			109.239	18.4786
				102.818	7.79648			109.355	18.7786
				102.929	7.63831			109.453	18.5946
				103.019	7.62852			109.552	18.1468
				103.115	6.98615			109.643	18.0142
				103.207	6.8731			109.753	18
				103.314	7.68636			109.858	18.1971
				103.415	8.0757			109.971	18.5932
				103.521	8.01846			110.084	18.6416
				103.628	7.36778			110.196	18.7424
				103.738	7.50877			110.287	18.3352
				103.826	7.56019			110.386	17.9095
				103.918	7.97866			110.483	18.0519
				104.012	8.05091			110.593	18.285
				104.099	7.34615			110.699	18.7728
				104.203	7.13987			110.813	18.7146
				104.307	7.38001			110.924	18.6004
				104.413	7.61768			111.035	18.2689
				104.52	7.90549			111.123	18.6598
				104.633	7.98974			111.217	18.2803
				104.724	7.85691			111.318	18.2336
				104.818	7.63481			111.413	18.6891
				104.909	7.57288			111.517	19.0487
				105.014	7.44627			111.622	19.3607
				105.117	7.32292			111.737	18.8547
				105.225	7.72856			111.845	18.829
				105.329	8.11233			111.96	18.6009
				105.442	8.31544			112.052	19.0312
				105.532	7.87208			112.151	18.9229
				105.623	7.50654			112.246	18.6417
				105.712	7.47546			112.359	18.6455
				105.823	7.6573			112.464	18.6802
				105.926	7.83243			112.576	18.5909
				106.035	7.72247			112.684	19.1541
				106.141	7.91396			112.798	19.3913
				106.252	8.07896			112.89	18.7391
				106.343	7.95237			112.985	18.1758
				106.438	7.71822			113.079	18.4368
				106.528	7.89675			113.166	18.2958
				106.636	7.85882			113.276	18.1967
				106.742	8.07625			113.385	18.4617
				106.849	8.01667			113.5	18.7115
				106.958	8.09987			113.608	19.3562
				107.064	7.79226			113.697	19.3943
				107.154	7.81409			113.796	18.7925
				107.248	7.92138			113.894	18.6347
				107.34	7.89026			113.984	18.8354
				107.425	7.8682			114.094	19.351
				107.527	7.96596			114.203	19.4998
				107.636	7.70274			114.315	19.3142
				107.747	7.66956			114.426	18.8742
				107.85	7.99229			114.54	18.9159
				107.963	8.24381			114.634	19.2637
				108.053	7.8634			114.732	19.5902
				108.151	7.55528			114.825	19.2685
				108.24	7.68753			114.937	19.3158
				108.345	7.60958			115.042	18.8475
				108.448	7.72341			115.156	18.8817
				108.558	7.59119			115.245	19.1455
				108.663	7.70523			115.354	19.6438
				108.775	7.86129			115.471	19.8144
				108.861	7.94397			115.569	19.1966
				108.952	7.45349			115.668	19.4204
				109.044	7.58784			115.756	19.0613
				109.128	7.77526			115.862	19.2328
				109.233	8.10293			115.97	19.2468
				109.338	8.23332			116.058	19.1781
				109.45	7.66708			116.166	19.5298
				109.556	7.23985			116.279	19.5046
				109.642	7.22645			116.371	19.2362
				109.73	8.10073			116.466	18.702
				109.824	8.19259			116.559	18.7674
				109.911	7.75761			116.647	18.7283
				110.018	7.9825			116.756	19.0496
				110.122	7.93368			116.864	19.0348
				110.231	8.17808			116.952	19.047
				110.338	8.20493			117.063	18.6602
				110.448	8.84799			117.18	19.0127
				110.539	8.23719			117.272	19.4756
				110.632	8.09541			117.368	19.428
				110.72	7.98151			117.459	19.5681
				110.828	7.56871			117.568	19.4179
				110.931	7.39466			117.677	19.6354
				111.04	7.50084			117.791	19.463
				111.125	8.08395			117.901	19.3589
				111.23	8.28841			118.016	19.3899
				111.319	8.50042			118.108	19.4355
				111.413	7.71886			118.204	19.4821
				111.507	7.52046			118.296	19.08
				111.594	7.50105			118.407	18.8996
				111.697	7.62714			118.514	18.6135
				111.799	8.12084			118.628	18.6286
				111.909	8.06066			118.716	19.0775
				112.016	8.2068			118.824	19.7866
				112.128	7.96745			118.916	19.9237
				112.222	8.09742			119.014	19.711
				112.318	7.69108			119.111	19.2014
				112.408	7.38948			119.2	18.7794
				112.513	7.8901			119.308	18.9562
				112.615	7.85721			119.414	18.9762
				112.721	8.11894			119.528	19.5737
				112.83	7.68734			119.639	19.5346
				112.939	7.94568			119.755	19.955
				113.029	7.72792			119.854	19.2356
				113.124	7.7102			119.953	19.0472
				113.217	7.7206			120.045	18.9538
				113.302	7.48785			120.152	19.2381
				113.404	7.87499			120.258	19.7747
				113.507	7.60172			120.369	19.874
				113.616	7.67642			120.482	19.9574
				113.722	7.92631			120.595	19.6573
				113.836	8.29322			120.688	19.2828
				113.928	7.6987			120.787	19.3098
				114.025	7.70834			120.883	19.7575
				114.113	7.3366			120.97	19.7282
				114.215	7.55738			121.075	20.0946
				114.319	7.74058			121.184	19.8142
				114.427	8.09236			121.297	19.4403
				114.532	8.36055			121.406	19.3681
				114.644	8.25522			121.493	19.6996
				114.733	8.274			121.587	19.5777
				114.827	7.74766			121.688	19.009
				114.919	7.82352			121.782	19.3292
				115.028	8.17111			121.891	19.4129
				115.131	8.29111			121.997	19.4627
				115.239	8.15844			122.107	19.712
				115.343	8.20426			122.217	19.9079
				115.452	8.31967			122.331	19.9435
				115.542	8.22034			122.424	19.9641
				115.635	8.23433			122.52	19.7191
				115.725	8.2151			122.615	19.3382
				115.809	8.24546			122.705	19.1853
				115.915	8.4579			122.812	19.5548
				116.021	8.20531			122.92	19.8728
				116.129	7.9094			123.032	19.8131
				116.233	7.94132			123.14	20.0055
				116.323	7.98335			123.23	19.931
				116.416	7.86898			123.323	19.8265
				116.512	8.07519			123.42	19.5954
				116.598	7.68161			123.509	19.5617
				116.704	7.37979			123.62	19.8894
				116.808	7.39977			123.731	19.8588
				116.917	7.74263			123.844	19.9525
				117.023	8.01939			123.955	19.9713
				117.135	8.37114			124.07	19.7791
				117.225	8.34536			124.167	19.4136
				117.32	7.82555			124.265	19.3206
				117.409	7.7021			124.356	19.7847
				117.518	7.56031			124.467	20.1518
				117.621	7.92191			124.576	20.0627
				117.733	8.12751			124.688	19.5759
				117.839	8.35945			124.799	19.6786
				117.947	8.46647			124.912	19.7133
				118.034	8.09996			125.004	19.5929
				118.127	7.92213			125.1	19.572
				118.221	7.68377			125.196	19.2409
				118.306	7.83617			125.283	19.3016
				118.41	7.99079			125.391	19.4558
				118.516	8.21999			125.502	19.3489
				118.624	7.93001			125.617	19.6471
				118.729	7.38232			125.725	19.6324
				118.842	7.50724			125.812	19.6952
				118.933	7.60449			125.902	19.9418
				119.028	7.71934			126.003	20.0692
				119.117	7.61828			126.098	19.8747
				119.222	7.5967			126.209	19.5998
				119.326	7.70246			126.316	19.9307
				119.434	7.5885			126.43	19.9846
				119.54	7.79158			126.538	20.3419
				119.652	8.35569			126.65	20.0069
				119.74	8.17979			126.742	19.749
				119.833	8.14765			126.839	19.5843
				119.923	8.00744			126.934	19.9368
				120.031	7.72425			127.023	20.062
				120.135	7.88225			127.13	20.0434
				120.243	7.89347			127.238	20.1402
				120.352	8.50673			127.352	19.8272
				120.461	8.54095			127.461	19.6585
				120.55	8.34496			127.549	19.8518
				120.64	7.62281			127.641	20.02
				120.731	7.50615			127.737	20.3531
				120.816	7.59523			127.83	20.0619
				120.919	7.47963			127.941	19.9267
				121.025	7.57103			128.049	19.8245
				121.137	7.72435			128.16	19.4166
				121.243	7.61029			128.248	19.6704
				121.331	7.99761			128.358	19.477
				121.42	7.79568			128.448	20.1501
				121.516	7.36376			128.541	19.9086
				121.606	7.59536			128.637	19.7866
				121.71	7.89998			128.727	19.8914
				121.814	8.35923			128.835	19.631
				121.921	7.84739			128.943	19.9161
				122.029	7.40249			129.057	19.9777
				122.14	7.90663			129.167	20.2333
				122.232	8.06015			129.256	20.3121
				122.328	8.33827			129.351	19.9115
				122.418	7.5638			129.45	19.7904
				122.527	7.39301			129.544	19.8671
				122.627	7.5118			129.655	20.1012
				122.734	7.80346			129.761	20.7995
				122.844	8.31975			129.872	20.5437
				122.952	8.30405			129.985	20.2683
				123.04	8.03573			130.097	20.2297
				123.132	7.67922			130.191	20.2637
				123.229	7.80671			130.288	20.3665
				123.316	7.34194			130.384	19.9999
				123.419	7.54191			130.473	19.9863
				123.521	7.73908			130.58	20.1356
				123.629	7.91477			130.686	20.1228
				123.736	7.8923			130.801	19.8745
				123.849	8.02409			130.91	20.0056
				123.937	7.77644			131.028	20.5184
				124.033	7.2004			131.123	20.5268
				124.124	7.51913			131.223	20.5762
				124.232	7.83882			131.315	20.5991
				124.332	8.252			131.424	20.4091
				124.439	7.82641			131.53	20.3283
				124.544	7.75449			131.641	20.5248
				124.655	7.52786			131.752	20.534
				124.743	7.8218			131.865	20.8378
				124.838	8.0065			131.956	20.6141
				124.931	8.05624			132.057	20.6055
				125.039	8.07779			132.152	20.2456
				125.142	7.90626			132.264	20.5106
				125.251	8.33677			132.371	21.0188
				125.357	8.24417			132.48	20.917
				125.463	8.1386			132.59	20.589
				125.553	7.81671			132.702	20.6225
				125.644	7.83194			132.793	20.7341
				125.737	8.37329			132.89	20.6196
				125.823	8.11458			132.986	20.9164
				125.927	7.70298			133.076	21.006
				126.032	7.51708			133.184	21.0269
				126.143	7.97891			133.292	20.9662
				126.245	8.16035			133.406	20.6215
				126.334	8.48774			133.513	20.7911
				126.423	7.58735			133.631	20.6591
				126.519	7.51789			133.725	21.2498
				126.609	7.27474			133.822	21.0368
				126.716	7.37463			133.913	21.0226
				126.821	7.80021			134.024	20.8669
				126.928	7.69915			134.13	21.031
				127.035	7.5827			134.244	21.0645
				127.145	7.80664			134.353	20.9013
				127.235	8.10472			134.47	20.9937
				127.329	7.86634			134.564	20.7564
				127.421	7.5792			134.663	20.9741
				127.505	7.77542			134.755	20.7544
				127.608	8.18985			134.866	20.6517
				127.716	7.97587			134.975	20.1622
				127.825	8.12333			135.087	20.0005
				127.93	8.00092			135.197	20.1623
				128.016	8.13864			135.31	20.7398
				128.104	7.93222			135.403	21.0418
				128.199	7.92833			135.503	20.5306
				128.292	8.24142			135.598	20.1606
				128.398	8.05062			135.71	20.1255
				128.5	8.12121			135.818	20.9539
				128.609	7.98447			135.933	21.0577
				128.718	8.37448			136.044	21.2002
				128.825	8.25148			136.153	21.0467
				128.913	8.36843			136.243	20.7149
				129.004	8.13897			136.337	20.734
				129.097	7.72902			136.437	20.8687
				129.183	7.3206			136.527	20.5217
				129.286	7.38352			136.634	20.9775
				129.391	8.18225			136.743	21.106
				129.501	8.29236			136.857	21.0117
				129.608	8.46369			136.967	20.5706
				129.692	8.10688			137.082	20.7984
				129.782	7.89606			137.173	21.1949
				129.874	7.81548			137.271	21.0706
				129.962	7.622			137.365	21.3645
				130.071	8.18895			137.476	20.734
				130.176	8.13344			137.583	20.5867
				130.283	8.21551			137.693	20.6757
				130.39	8.21417			137.806	20.8597
				130.498	8.28695			137.92	21.3842
				130.589	7.82611			138.012	21.0367
				130.683	7.91095			138.108	21.2841
				130.773	8.00181			138.2	21.1204
				130.882	8.42591			138.288	20.6189
				130.985	8.41374			138.397	20.9442
				131.093	7.96822			138.506	20.8451
				131.177	8.16388			138.619	20.8302
				131.283	8.11241			138.727	20.8223
				131.371	8.39854			138.816	20.9953
				131.461	8.17615			138.911	21.132
				131.557	8.31764			139.008	21.1065
				131.646	8.55087			139.099	20.7789
				131.749	8.5614			139.208	20.9495
				131.847	8.58319			139.316	21.509
				131.958	8.324			139.43	21.4956
				132.042	8.22534			139.542	21.4632
				132.151	8.32858			139.656	21.0901
				132.242	8.63738			139.75	20.9522
				132.335	8.56692			139.851	20.7591
				132.429	8.02762			139.944	20.9792
				132.519	7.94546			140.054	21.3056
				132.62	7.58831			140.16	21.32
				132.721	8.44109			140.271	21.0194
				132.831	8.75574			140.36	21.0136
				132.936	8.95716			140.47	20.9698
				133.02	8.78057			140.561	21.253
				133.112	8.48687			140.656	21.1416
				133.208	8.28334			140.755	21.0612
				133.299	8.02415			140.846	21.1352
				133.406	8.54782			140.954	21.1805
				133.508	9.08062			141.059	21.1423
				133.614	8.90629			141.172	21.3195
				133.723	8.87517			141.282	21.2501
				133.831	8.44077			141.397	21.5765
				133.918	8.43925			141.491	21.2409
				134.011	8.5315			141.593	21.1944
				134.106	8.62242			141.687	20.7754
				134.192	8.52203			141.797	20.5907
				134.293	8.41027			141.901	21.3878
				134.397	8.38824			142.013	21.6198
				134.507	8.16192			142.125	21.4912
				134.61	8.3247			142.237	21.6299
				134.724	8.76958			142.328	21.6987
				134.815	8.66934			142.426	21.2908
				134.91	8.44953			142.523	21.3591
				134.999	8.71438			142.612	21.6619
				135.106	8.37301			142.718	21.8491
				135.208	8.48586			142.825	21.6973
				135.318	8.62295			142.938	21.3762
				135.421	9.19741			143.045	21.2746
				135.534	8.78184			143.132	21.4927
				135.624	8.22074			143.225	21.9133
				135.716	8.07671			143.323	21.6153
				135.807	7.68327			143.418	21.6702
				135.915	8.36864			143.53	21.5717
				136.019	8.46791			143.637	21.2798
				136.128	8.71663			143.749	21.0059
				136.233	9.00053			143.858	21.0814
				136.343	9.11209			143.971	21.2547
				136.434	8.91486			144.065	21.2954
				136.53	8.88599			144.159	21.4961
				136.621	8.89677			144.254	21.3738
				136.73	8.84767			144.341	21.1296
				136.834	8.66831			144.45	20.9379
				136.942	8.59426			144.561	20.825
				137.05	8.54797			144.673	21.2043
				137.157	8.4321			144.781	21.6433
				137.247	8.70746			144.871	21.7922
				137.34	8.31442			144.967	21.2214
				137.434	8.45183			145.066	21.4012
				137.519	8.10815			145.157	20.9797
				137.623	7.95485			145.267	21.0659
				137.729	8.3247			145.377	21.3494
				137.838	8.0592			145.49	21.4768
				137.944	8.5843			145.599	21.6579
				138.058	8.79261			145.714	21.6059
				138.148	8.8419			145.808	21.3285
				138.241	8.58506			145.906	21.2898
				138.33	8.24639			146	21.4169
				138.437	8.23821			146.111	21.9196
				138.54	8.54847			146.219	21.9042
				138.649	8.45484			146.327	22.087
				138.755	8.76435			146.43	22.4543
				138.864	8.73604			146.519	21.7051
				138.952	8.63322			146.625	21.5875
				139.046	8.12682			146.719	21.7871
				139.139	8.15271			146.813	21.891
				139.223	8.8539			146.902	21.9306
				139.326	9.10728			147.009	21.8548
				139.431	9.11566			147.116	21.8617
				139.542	8.79834			147.23	21.8495
				139.646	8.49482			147.339	22.037
				139.732	8.87731			147.452	22.6793
				139.82	8.71252			147.543	22.2585
				139.915	8.73951			147.641	22.1353
				140.004	8.81337			147.736	21.7509
				140.113	8.48369			147.823	21.5208
				140.215	8.50539			147.929	21.6112
				140.323	8.67303			148.038	21.8542
				140.431	8.80363			148.125	22.2882
				140.543	8.76836			148.235	22.3569
				140.631	8.90611			148.351	22.7893
				140.723	9.03365			148.442	22.1971
				140.811	8.64864			148.54	22.0711
				140.92	8.43843			148.632	21.9582
				141.024	8.31485			148.743	22.2741
				141.132	8.29168			148.851	22.3522
				141.241	8.62527			148.963	22.4822
				141.35	8.97587			149.075	21.8568
				141.442	8.87321			149.19	21.6528
				141.536	8.33902			149.282	21.5572
				141.628	8.33425			149.378	21.9362
				141.738	8.71264			149.469	21.8806
				141.841	8.89703			149.582	21.8299
				141.948	8.70187			149.689	21.9874
				142.056	8.7706			149.801	21.6908
				142.162	8.99125			149.915	21.7963
				142.252	9.02906			150.028	21.8591
				142.347	8.55486			150.123	22.1878
				142.441	8.10121			150.221	22.0812
				142.526	8.48903			150.315	22.4022
				142.629	9.00884			150.428	22.2421
				142.733	9.07677			150.535	21.9931
				142.844	8.81949			150.646	21.7641
				142.948	8.61841			150.759	21.6457
				143.032	8.52986			150.87	22.326
				143.122	9.24348			150.962	22.4062
				143.217	9.20756			151.059	22.451
				143.312	8.87668			151.157	21.6697
				143.396	8.79785			151.246	21.5469
				143.496	8.89471			151.351	21.7405
				143.6	9.13735			151.46	22.2941
				143.71	8.97019			151.575	22.3879
				143.815	9.14081			151.684	22.5167
				143.927	9.32419			151.798	22.1462
				144.018	9.1051			151.893	21.7188
				144.117	9.00196			151.996	22.1436
				144.208	8.64945			152.09	22.0287
				144.31	8.73353			152.198	22.4691
				144.411	8.87266			152.303	22.5405
				144.519	9.24596			152.414	22.0511
				144.624	9.84393			152.526	21.8451
				144.735	9.93573			152.638	21.9497
				144.825	9.4639			152.728	22.3287
				144.919	8.76986			152.826	22.0878
				145.011	8.83004			152.925	21.9783
				145.119	9.39939			153.013	22.5689
				145.221	10.0156			153.118	22.6021
				145.33	10.2004			153.224	22.3634
				145.435	9.59974			153.337	22.2475
				145.545	9.39991			153.447	22.2767
				145.635	9.16216			153.564	22.3967
				145.727	9.56583			153.657	22.2774
				145.817	9.58411			153.756	22.3371
				145.902	9.31771			153.849	21.7673
				146.007	9.11687			153.958	21.9788
				146.113	9.04864			154.065	22.0608
				146.221	9.3223			154.177	22.4337
				146.325	8.91916			154.285	22.5584
				146.414	9.12574			154.374	22.8292
				146.508	8.87896			154.465	22.2046
				146.602	8.81197			154.561	21.9111
				146.688	9.13572			154.654	22.0045
				146.795	9.23252			154.742	22.0493
				146.9	8.85092			154.851	22.4862
				147.01	8.52636			154.961	22.3661
				147.115	8.97266			155.073	22.6122
				147.226	9.51981			155.182	21.85
				147.316	9.13863			155.274	21.8498
				147.413	8.51566			155.37	21.4467
				147.502	8.22936			155.467	21.3461
				147.61	8.33146			155.556	22.2324
				147.712	8.82			155.666	22.5655
				147.823	9.09512			155.777	22.9802
				147.931	9.20574			155.889	22.396
				148.038	9.13464			155.999	22.5676
				148.126	9.14785			156.113	22.4592
				148.219	8.97117			156.208	22.335
				148.313	8.82926			156.308	22.7371
				148.398	8.70205			156.4	22.3181
				148.501	9.25479			156.511	22.5641
				148.605	9.07985			156.619	22.2216
				148.69	9.23209			156.732	21.9785
				148.796	8.81002			156.845	22.3008
				148.907	8.96939			156.956	22.6381
				148.995	8.88087			157.046	22.5974
				149.087	8.76186			157.143	22.3598
				149.179	9.17122			157.24	21.7574
				149.263	8.7587			157.327	21.821
				149.364	8.65676			157.433	21.8409
				149.469	8.31075			157.542	21.8873
				149.554	8.49558			157.629	22.0868
				149.659	8.93183			157.743	22.1719
				149.771	9.38746			157.855	22.605
				149.861	9.27573			157.945	22.0935
				149.955	9.00677			158.042	22.0389
				150.043	8.78351			158.138	22.1387
				150.15	8.65191			158.25	22.3438
				150.255	8.6863			158.356	22.7616
				150.362	8.87548			158.465	22.6211
				150.469	9.28943			158.554	22.3831
				150.582	9.11733			158.663	21.9243
				150.672	9.20115			158.752	22.2392
				150.764	8.52111			158.845	22.044
				150.853	8.19656			158.939	21.9529
				150.961	8.60131			159.032	22.5981
				151.065	9.00285			159.142	22.9938
				151.173	9.40321			159.251	22.4174
				151.281	8.98362			159.364	22.1009
				151.393	8.6138			159.475	21.8778
				151.484	8.21569			159.592	22.2834
				151.578	8.76409			159.685	22.6819
				151.668	9.06262			159.78	22.489
				151.776	9.19322			159.87	22.3684
				151.878	9.32663			159.982	21.7977
				151.984	8.71564			160.09	21.9565
				152.094	8.57851			160.203	21.6405
				152.203	8.60082			160.315	22.4234
				152.292	8.94564			160.429	23.0764
				152.387	8.40463			160.524	23.1729
				152.482	8.6582			160.622	22.5018
				152.567	8.99076			160.715	22.2906
				152.67	9.15152			160.828	22.2863
				152.774	8.84879			160.933	22.8326
				152.884	8.58234			161.044	23.3797
				152.989	8.73406			161.131	23.0051
				153.101	9.18816			161.24	22.6901
				153.193	9.67016			161.33	22.5808
				153.289	9.02154			161.427	22.7088
				153.379	8.50249			161.527	22.353
				153.485	8.49092			161.618	22.6301
				153.585	9.05072			161.727	22.822
				153.694	9.67002			161.833	23.058
				153.8	9.53203			161.948	22.9553
				153.91	9.21766			162.057	22.6411
				153.998	8.7895			162.17	22.7399
				154.093	8.88333			162.263	22.5911
				154.188	8.92515			162.363	22.9089
				154.273	8.75966			162.458	22.8828
				154.373	9.26564			162.57	23.2761
				154.476	9.6325			162.676	22.7691
				154.583	9.38364			162.787	22.6158
				154.69	9.65993			162.896	22.7272
				154.775	9.20452			163.009	23.2568
				154.865	9.03405			163.098	23.4331
				154.96	9.19747			163.193	23.0419
				155.053	8.88172			163.294	22.9961
				155.159	9.00173			163.386	22.6265
				155.262	8.99967			163.493	22.7521
				155.37	8.5928			163.598	22.4704
				155.474	8.69528			163.71	22.9215
				155.586	9.06321			163.819	22.5976
				155.674	9.37126			163.936	22.6907
				155.766	9.16037			164.029	22.6876
				155.856	8.96824			164.126	22.2752
				155.94	9.16191			164.22	21.8828
				156.047	8.97898			164.331	22.0034
				156.153	9.19656			164.437	22.4876
				156.262	9.31168			164.551	22.5124
				156.365	9.58247			164.657	22.6542
				156.455	9.748			164.773	22.7757
				156.549	9.10431			164.867	22.7871
				156.643	8.84504			164.962	22.4723
				156.73	8.93432			165.055	22.7221
				156.835	9.091			165.168	22.8376
				156.94	9.29711			165.278	23.2588
				157.049	9.37976			165.391	22.8663
				157.153	9.25579			165.5	22.7894
				157.267	9.53318			165.614	22.3828
				157.359	8.98806			165.708	22.6701
				157.454	8.93512			165.805	22.9736
				157.543	8.64759			165.9	22.8056
				157.65	9.01348			166.013	22.5796
				157.752	9.37011			166.122	22.5529
				157.864	9.14566			166.232	22.669
				157.971	9.1815			166.345	22.8219
				158.079	9.18252			166.454	22.5535
				158.168	9.3429			166.547	22.5827
				158.261	9.31583			166.644	22.4316
				158.355	9.28392			166.741	22.7575
				158.44	9.15104			166.83	22.5472
				158.541	8.82099			166.938	22.5022
				158.646	8.78411			167.048	22.6258
				158.73	8.82554			167.164	23.1424
				158.835	9.32538			167.271	23.1662
				158.945	9.44057			167.386	22.9995
				159.034	9.35661			167.48	22.7918
				159.128	9.2346			167.579	22.744
				159.218	8.99993			167.673	22.9303
				159.327	8.78716			167.782	23.5407
				159.43	9.12657			167.888	23.5663
				159.537	9.4454			168.002	23.2358
				159.622	9.37207			168.112	22.8771
				159.728	9.1796			168.226	23.0119
				159.813	9.17323			168.317	22.8658
				159.904	8.98928			168.412	22.9614
				159.996	8.56828			168.507	23.2299
				160.085	8.44158			168.621	23.1018
				160.191	9.12677			168.73	23.0507
				160.295	9.49479			168.839	22.7058
				160.404	9.53461			168.927	22.7315
				160.511	9.13386			169.035	22.7723
				160.623	9.25746			169.123	22.8722
				160.712	9.17174			169.216	22.8957
				160.804	9.55011			169.312	22.944
				160.891	9.70445			169.405	22.6343
				160.998	9.72076			169.517	22.5642
				161.103	9.50201			169.625	22.7599
				161.213	9.36341			169.738	23.0586
				161.321	9.26221			169.849	23.1893
				161.432	9.20427			169.962	23.1912
[truncated: 1,406 more rows]

## Sheet: Figure 2b
Ei/Ef	Normalized Stress
0.000515464	0.98969
0.01	0.85
0.05155	0.7268
0.13299	0.50608
0.51546	0.37629
0.65	0.35
1	0.323
5.15464	0.2799
51.5464	0.26701

## Sheet: Figure 2c
Ti/Tf	Normalized Stress
0.1	0.93763
0.5	0.74309
1	0.6701
2	0.60825
5	0.5167
10	0.46423
30	0.41
50	0.39639
100	0.39536

## Sheet: Figure 2d
Normalized delamination area	Normalized Stress
1.2875	0.70211
1.4875	0.73907
2.01667	0.75088
3.2	0.77773
8.23	0.79023
16	1.36438
28.5	2.06423
35.05	3.24526
41.3125	8.92835

## Sheet: Figure 2h
		Interlayer thickness
Strain (%)	w/o	200 nm	500 nm	1 μm	2 μm
0	1	1	1	1	1
25	1.13636	1.0999	1.13649	1.03407	1.10018
50	0.3409	0.31231	0.32619	0.57989	0.82927
75	0.06095	0.12225	0.26044	0.4643	0.53812
100	0.02489	0.03319	0.11342	0.3295	0.38807

## Sheet: Figure 3b
VGS	ID	IG	ISQURT
10	9.67015e-09	3.54967e-08	0.09834
9	6.58383e-09	4.81186e-08	0.08114
8	4.43694e-09	4.81186e-08	0.06661
7	3.02836e-09	3.54967e-08	0.05503
6	2.22157e-09	4.55942e-08	0.04713
5	6.71531e-09	4.30698e-08	0.08195
4	2.20345e-08	4.05454e-08	0.14844
3	5.67423e-08	3.29723e-08	0.23821
2	1.21717e-07	5.31674e-08	0.34888
1	2.29999e-07	4.30698e-08	0.47958
0	3.75774e-07	4.05454e-08	0.613
-1	5.27332e-07	3.54967e-08	0.72618
-2	7.26172e-07	3.54967e-08	0.85216
-3	9.37374e-07	5.31674e-08	0.96818
-4	1.15331e-06	3.04479e-08	1.07392
-5	1.3755e-06	3.04479e-08	1.17282
-6	1.6016e-06	4.05454e-08	1.26554
-7	1.83269e-06	4.30698e-08	1.35377
-8	2.06696e-06	2.79235e-08	1.43769
-9	2.31055e-06	2.79235e-08	1.52005
-10	2.55733e-06	3.04479e-08	1.59917
-11	2.80759e-06	3.29723e-08	1.67559
-12	3.06804e-06	2.79235e-08	1.75158
-13	3.33274e-06	2.28747e-08	1.82558
-14	3.60205e-06	2.53991e-08	1.89791
-15	3.87857e-06	3.54967e-08	1.96941
-16	4.15943e-06	2.28747e-08	2.03947
-17	4.4471e-06	2.79235e-08	2.10881
-18	4.7412e-06	3.04479e-08	2.17743
-19	4.97523e-06	2.03503e-08	2.23052
-20	5.2823e-06	1.27772e-08	2.29833
-21	5.59358e-06	1.53016e-08	2.36508
-22	5.91164e-06	1.53016e-08	2.43139
-23	6.23227e-06	7.7284e-09	2.49645
-24	6.56018e-06	1.55239e-10	2.56128
-25	6.89335e-06	2.67962e-09	2.62552
-26	7.23089e-06	9.94231e-09	2.68903
-27	7.57474e-06	2.67962e-09	2.75222
-28	7.92297e-06	1.24667e-08	2.81478
-29	8.27378e-06	1.49911e-08	2.87642
-30	8.62953e-06	1.49911e-08	2.93761
-31	8.99174e-06	2.7613e-08	2.99862
-32	9.35829e-06	3.26618e-08	3.05913
-33	9.72684e-06	3.26618e-08	3.11879
-34	1.00964e-05	3.77106e-08	3.17749
-35	1.04735e-05	4.0235e-08	3.23627
-36	1.08526e-05	4.78081e-08	3.29433
-37	1.12349e-05	5.53813e-08	3.35186
-38	1.1629e-05	5.79057e-08	3.41013
-39	1.20192e-05	6.29545e-08	3.46687
-40	1.24164e-05	6.54788e-08	3.52369
-40	1.24032e-05	5.28569e-08	3.52182
-39	1.19757e-05	4.27593e-08	3.46059
-38	1.15533e-05	4.52837e-08	3.39901
-37	1.11339e-05	4.27593e-08	3.33675
-36	1.07168e-05	2.50886e-08	3.27365
-35	1.0299e-05	3.01374e-08	3.2092
-34	9.88556e-06	2.50886e-08	3.14413
-33	9.47879e-06	2.00399e-08	3.07876
-32	9.07473e-06	1.24667e-08	3.01243
-31	8.67652e-06	9.94231e-09	2.94559
-30	8.28163e-06	7.41792e-09	2.87778
-29	7.89436e-06	9.94231e-09	2.80969
-28	7.51352e-06	1.02528e-08	2.74108
-27	7.1406e-06	1.02528e-08	2.67219
-26	6.77036e-06	1.02528e-08	2.60199
-25	6.40991e-06	5.20401e-09	2.53178
-24	6.05644e-06	1.55239e-10	2.46098
-23	5.71061e-06	2.28747e-08	2.38969
-22	5.37064e-06	2.53991e-08	2.31746
-21	5.03793e-06	1.53016e-08	2.24453
-20	4.71379e-06	2.28747e-08	2.17113
-19	4.39827e-06	2.03503e-08	2.0972
-18	4.09081e-06	2.53991e-08	2.02257
-17	3.75092e-06	3.54967e-08	1.93673
-16	3.45954e-06	4.55942e-08	1.85998
-15	3.17647e-06	3.54967e-08	1.78227
-14	2.90428e-06	4.30698e-08	1.70419
-13	2.63998e-06	3.54967e-08	1.6248
-12	2.38603e-06	3.8021e-08	1.54468
-11	2.13982e-06	4.55942e-08	1.46281
-10	1.90475e-06	3.29723e-08	1.38013
-9	1.67969e-06	4.55942e-08	1.29603
-8	1.4644e-06	4.05454e-08	1.21012
-7	1.25919e-06	4.05454e-08	1.12214
-6	1.06493e-06	4.30698e-08	1.03195
-5	8.82247e-07	3.54967e-08	0.93928
-4	7.10669e-07	3.29723e-08	0.84301
-3	5.51291e-07	2.79235e-08	0.74249
-2	4.06841e-07	4.05454e-08	0.63784
-1	2.79642e-07	3.29723e-08	0.52881
0	1.74184e-07	4.05454e-08	0.41735
1	9.36819e-08	4.55942e-08	0.30608
2	4.26169e-08	5.82161e-08	0.20644
3	1.58538e-08	4.55942e-08	0.12591
4	5.54696e-09	4.55942e-08	0.07448
5	4.3096e-09	5.31674e-08	0.06565
6	4.73836e-09	4.81186e-08	0.06884
7	5.44588e-09	4.81186e-08	0.0738
8	6.23439e-09	3.35284e-08	0.07896
9	7.22445e-09	3.3074e-08	0.085
10	8.23128e-09	3.31245e-08	0.09073

## Sheet: Figure 3c
Parallel strain (%)	Mobility (cm2/Vs)	Error bar
0	0.724	0.07797
25	0.81	0.099
50	0.732	0.08136
75	0.602	0.05933
100	0.442	0.05404
Release	0.094	0.0114
Perpendicular strain (%)	Mobility (cm2/Vs)	Error bar
0	1.066	0.16072
25	0.724	0.03578
50	0.494	0.02702
75	0.3	0.01732
100	0.19	0.01581
Rlease	0.362	0.03493

## Sheet: Figure 3d
Perpendicular stretched cycles (released)	Mobility (cm2/Vs)	Error bar
1	0.094	0.0114
10	0.094	0.00548
100	0.056	0.00548
1000	0.067	0.02082
Perpendicular stretched cycles (100% strain)	Mobility (cm2/Vs)	Error bar
1	0.442	0.05404
10	0.288	0.03347
100	0.192	0.00837
1000	0.18	0.01732
Parallel stretched cycles (released)	Mobility (cm2/Vs)	Error bar
1	0.362	0.03493
10	0.226	0.02302
100	0.164	0.01817
1000	0.116	0.01517
Parallel stretched cycles (100% strain)	Mobility (cm2/Vs)	Error bar
1	0.19	0.01581
10	0.148	0.01304
100	0.108	0.01095
1000	0.032	0.00447

## Sheet: Figure 3g
	Young's modulus (kPa)		Ultrasoft active matrix	Strain (%)	Stress (kPa)	Pure hydrogel	Strain (%)	Stress (kPa)	Ultrasoft active matrix with nonpatterned soft interlayer	Strain (%)	Stress (kPa)
Ultrasoft active matrix	5.2			0	0.86808		0	0.00676		0	0.12294
Pure hydrogel	2.58			0	0.53075		0	0.0314		0	0.28699
Ultrasoft active matrix with nonpatterned soft interlayer	14.4			0	1.08909		0	-0.06821		0	0.79995
				0	0.81069		0	-0.06281		0.000116954	0.59352
				0	1.21686		0.0017	0.10861		0.0018	0.11626
				0.00934	1.34337		0.01127	-0.31174		0.00707	0.33121
				0.02029	1.3648		0.02396	-0.42332		0.01114	0.96484
				0.0354	1.01455		0.03871	-0.76567		0.01689	0.66188
				0.0527	0.76482		0.04766	-0.63366		0.02424	1.02094
				0.06179	0.8808		0.05675	-0.57829		0.02843	0.85609
				0.07238	0.82522		0.06578	-0.55046		0.03298	0.77241
				0.08346	0.70301		0.07515	-0.64508		0.03798	0.85741
				0.09408	0.63424		0.08465	-0.67625		0.04309	1.06615
				0.10429	0.73286		0.09508	-0.3042		0.04855	1.12893
				0.11495	0.72096		0.10582	-0.12029		0.05385	0.91245
				0.12693	0.6344		0.11668	-0.27327		0.05894	0.82321
				0.13948	0.8502		0.12799	-0.25997		0.06427	0.81113
				0.15169	1.0554		0.1397	-0.12905		0.07003	0.97744
				0.16416	1.10132		0.15129	-0.02361		0.07617	0.86168
				0.17785	1.03439		0.16393	-0.05461		0.08273	0.70929
				0.19279	1.02696		0.17671	-0.21057		0.08967	0.67518
				0.20748	1.16158		0.19022	-0.19535		0.09634	0.8295
				0.22259	1.24999		0.20249	0.10533		0.10313	0.91259
				0.23742	1.17165		0.21647	0.1244		0.11043	0.69367
				0.25239	1.15471		0.2312	-0.009		0.11801	0.41557
				0.2678	1.29543		0.24664	0.11082		0.12551	0.36574
				0.2831	1.20835		0.26127	0.08419		0.13353	0.56965
				0.29864	1.06685		0.27661	0.09777		0.14216	0.28631
				0.31566	1.0177		0.29329	-0.14248		0.15055	0.16359
				0.33473	0.94551		0.31008	-0.29953		0.1593	0.35028
				0.35393	0.82346		0.32687	-0.41913		0.16799	0.62582
				0.37398	0.61412		0.34437	-0.40025		0.17712	0.61179
				0.39437	0.60449		0.36159	-0.48903		0.1864	0.32291
				0.415	0.61342		0.37865	-0.32152		0.196	0.37158
				0.43529	0.64999		0.3959	-0.32184		0.20632	0.75977
				0.45556	0.58821		0.41269	-0.53172		0.21625	1.00474
				0.47634	0.50071		0.42811	-0.43062		0.22595	0.89662
				0.49802	0.77761		0.4438	-0.6197		0.23605	0.93852
				0.51898	0.87691		0.46236	-0.69364		0.24617	1.10544
				0.54024	1.07245		0.4826	-0.63492		0.25643	1.26177
				0.56153	1.29475		0.5025	-0.36909		0.26639	1.26182
				0.58269	1.49357		0.52129	-0.03744		0.27659	1.20657
				0.60335	1.58123		0.53877	-0.07607		0.28716	1.11701
				0.6245	1.66144		0.55879	-0.38783		0.29791	1.04801
				0.6461	1.75553		0.58201	-0.29374		0.30863	0.97047
				0.66854	1.76587		0.60594	0.01836		0.31962	0.8437
				0.69081	1.70402		0.62948	-0.02746		0.33105	0.79226
				0.71342	1.6141		0.65375	0.13327		0.34239	0.8824
				0.73694	1.72174		0.67828	0.20204		0.35372	0.91795
				0.76164	1.61689		0.70263	0.30763		0.36517	0.94354
				0.78737	1.47141		0.72683	0.4407		0.37653	0.91242
				0.81298	1.33632		0.75155	0.33018		0.38812	0.68136
				0.83963	1.28901		0.77709	0.38548		0.40051	0.95159
				0.86685	1.21811		0.80111	0.42074		0.41284	1.11182
				0.89529	0.90275		0.82433	0.3077		0.42543	1.19996
				0.9236	0.80107		0.84925	0.1078		0.43861	1.16033
				0.9505	0.91625		0.87519	0.10481		0.4518	1.30374
				0.9763	1.06258		0.90256	0.12176		0.46439	1.70734
				1.00259	0.94888		0.93049	0.21741		0.47612	1.85478
				1.03025	0.78909		0.95994	0.16345		0.48761	1.53113
				1.05947	0.80352		0.9898	0.08658		0.49964	1.3322
				1.08948	0.97656		1.01953	-0.0223		0.51229	1.73418
				1.12053	0.99178		1.05093	-0.12001		0.52552	1.8991
				1.15269	0.96252		1.0839	0.02873		0.53963	1.793
				1.18358	1.06473		1.11645	0.18043		0.55405	1.55556
				1.2145	1.15172		1.14771	0.24078		0.56853	1.62412
				1.24664	1.21941		1.17819	0.24068		0.58317	1.65297
				1.27854	1.1764		1.20832	0.2779		0.59793	1.28016
				1.31047	1.07205		1.23786	0.49772		0.61329	0.89996
				1.34242	1.18795		1.26731	0.54917		0.62847	1.03318
				1.37349	1.22911		1.29459	0.38726		0.64337	1.24448
				1.40298	1.17705		1.32105	0.44845		0.65764	1.14019
				1.43233	1.13101		1.34573	0.57736		0.67158	0.87136
				1.45986	1.12088		1.36961	0.71156		0.68477	0.8618
				1.48755	1.21472		1.39427	0.57496		0.69752	1.02477
				1.51404	1.27857		1.41945	0.63255		0.7101	1.2011
				1.54044	1.25674		1.44521	0.7411		0.72311	1.20192
				1.56801	1.02527		1.47127	0.75527		0.73605	1.2661
				1.59512	1.10897		1.49888	0.47627		0.74861	1.56667
				1.62195	1.31925		1.5264	0.22654		0.76094	1.81177
				1.64938	1.45618		1.55456	0.26417		0.77377	1.95538
				1.67719	1.34107		1.58247	0.18618		0.78682	1.94975
				1.70477	1.2594		1.60942	0.07145		0.79967	2.04281
				1.73222	1.39238		1.63557	-0.24069		0.81263	2.01394
				1.76057	1.60368		1.66194	-0.20466		0.82599	2.13275
				1.78937	1.50929		1.68906	-0.03508		0.83989	2.22708
				1.8172	1.51075		1.71692	0.04167		0.85331	2.20149
				1.84369	1.73092		1.74499	0.0105		0.8669	2.26913
				1.87078	1.97133		1.77393	-0.06507		0.87929	2.28308
				1.89902	1.93787		1.80374	0.04506		0.8911	2.21853
				1.92811	1.722		1.83444	0.18607		0.90306	1.96742
				1.95779	1.89107		1.8648	0.24012		0.91531	1.80289
				1.98845	2.07686		1.8954	0.22168		0.92814	1.83029
				2.01952	2.02225		1.92706	0.26756		0.94194	2.08376
				2.05076	1.69312		1.95844	0.34007		0.95576	1.86929
				2.08212	1.59399		1.98935	0.23613		0.97	1.59499
				2.11444	1.59433		2.02	0.12892		0.9847	1.53125
				2.14695	1.69941		2.0501	-0.02311		0.99983	1.58421
				2.17865	1.62205		2.0793	0.163		1.01519	1.52705
				2.20961	1.26264		2.10756	0.20779		1.03039	1.37467
				2.24024	1.2408		2.1337	0.07369		1.04529	1.42846
				2.27056	1.24069		2.15917	-0.07815		1.0599	1.70118
				2.3003	1.3642		2.18445	0.02073		1.07446	1.81884
				2.32833	1.27096		2.21051	0.18302		1.08834	1.83981
				2.35506	1.37049		2.23549	0.29381		1.10115	1.98766
				2.38218	1.58929		2.2597	0.20756		1.11326	2.09762
				2.41018	1.82316		2.2845	0.08707		1.12504	2.21373
				2.43787	1.70524		2.31074	0.18154		1.13672	2.18283
				2.46461	1.45137		2.33739	0.12371		1.14876	2.30389
				2.4906	1.70499		2.36431	-0.00564		1.16124	2.52236
				2.51711	1.97249		2.39203	-0.00344		1.17399	2.72717
				2.54493	2.03763		2.41996	0.19461		1.18691	2.76822
				2.57192	1.75464		2.44759	0.32803		1.20048	2.77521
				2.59987	1.82923		2.47435	0.38285		1.21373	2.42071
				2.62873	2.02374		2.50065	0.3438		1.22688	2.257
				2.65686	2.22006		2.52777	0.52168		1.24024	2.28312
				2.6831	1.98942		2.55531	0.62532		1.25394	2.34725
				2.70911	1.64618		2.58411	0.85041		1.26796	2.23628
				2.73642	1.85852		2.61413	0.7585		1.28077	2.16687
				2.76441	1.99646		2.64374	0.81673		1.29315	2.27376
				2.79366	1.93362		2.67369	0.63441		1.30607	2.41341
				2.823	1.76968		2.70327	0.57724		1.31899	2.34222
				2.85259	1.88525		2.73366	0.47408		1.33209	2.1973
				2.88349	2.06835		2.76545	0.35601		1.34591	2.54308
				2.91489	2.03059		2.7975	0.15251		1.35973	2.79963
				2.94702	1.74651		2.8293	0.00478		1.37408	2.7926
				2.98046	1.73701		2.8599	-0.03663		1.38881	2.55705
				3.01345	2.31645		2.88879	-0.39274		1.40374	2.73805
				3.04543	2.51908		2.91739	-0.57093		1.41915	2.92764
				3.0764	2.3989		2.94454	-0.54407		1.43443	2.89451
				3.10636	2.26339		2.97073	-0.2644		1.44956	2.58007
				3.13534	2.34844		2.9967	-0.20138		1.46433	2.52909
				3.16421	2.61236		3.02208	-0.23426		1.47857	2.72683
				3.19237	2.61327		3.04779	-0.24758		1.49238	2.71745
				3.21958	2.48201		3.07374	0.09928		1.50552	2.70525
				3.24639	2.54425		3.09975	0.36811		1.51819	2.53495
				3.2734	2.8695		3.12564	0.46619		1.53022	2.68842
				3.30123	2.88188		3.15203	0.62266		1.54205	2.71529
				3.3283	2.70212		3.17816	0.93582		1.55393	2.73536
				3.35574	2.56472		3.20531	1.22555		1.56552	2.70214
				3.38432	2.70048		3.23349	1.22055		1.57771	2.77618
				3.41261	2.84278		3.26054	1.26786		1.59029	2.85483
				3.44037	2.62151		3.28611	1.2612		1.60306	2.86962
				3.46875	2.39271		3.31233	1.27384		1.61617	2.88686
				3.4969	2.43959		3.339	1.0074		1.62953	2.75914
				3.52622	2.64858		3.36655	0.76326		1.64306	2.90903
				3.55425	2.49141		3.39438	0.74243		1.65688	3.06731
				3.58067	2.12706		3.42228	0.78217		1.6703	3.20067
				3.60686	1.91719		3.45021	0.73688		1.68289	3.04284
				3.63427	2.17533		3.47997	0.49576		1.69569	2.94311
				3.66288	2.30989		3.51069	0.45306		1.70873	3.14561
				3.69234	2.21573		3.54144	0.24403		1.72176	3.41398
				3.72354	2.15601		3.5726	0.23058		1.73527	3.31247
				3.75505	2.35823		3.60455	0.24292		1.74965	3.13782
				3.78565	2.60028		3.63601	0.46429		1.76428	3.19649
				3.81688	2.54878		3.66639	0.54371		1.77867	3.52181
				3.84957	2.35277		3.69604	0.65138		1.79342	3.50786
				3.8819	2.34916		3.72565	0.83909		1.80852	3.17111
				3.91349	2.63857		3.75394	0.95975		1.82377	3.13386
				3.94453	2.86027		3.78219	0.84874		1.83882	3.41485
				3.97498	2.59715		3.80851	0.6811		1.85353	3.37473
				4.00534	2.60531		3.83436	0.85218		1.86807	3.0596
				4.03344	2.91499		3.86044	0.97516		1.88235	3.07326
				4.06003	2.94311		3.88719	1.16006		1.89612	3.3217
				4.08677	2.69505		3.91339	1.00462		1.90907	3.45319
				4.11379	2.48877		3.93882	1.15657		1.92171	3.04188
				4.14014	2.65018		3.96445	1.17359		1.93407	2.90205
				4.16691	3.04161		3.99064	0.90184		1.94617	3.14036
				4.19396	3.11567		4.01704	0.65531		1.95823	3.36619
				4.22145	2.73657		4.04437	0.66601		1.97035	3.09093
				4.24968	2.55686		4.07279	0.87476		1.98218	3.06233
				4.27788	2.51946		4.09908	0.81187		1.99417	3.2084
				4.30688	2.38214		4.12306	0.73625		2.00648	3.31778
				4.33668	2.31747		4.1475	0.52091		2.01939	3.35842
				4.36661	2.28778		4.17309	0.58408		2.03226	3.36604
				4.39537	2.50434		4.20025	0.49775		2.04606	3.69002
				4.42328	2.70022		4.22765	0.45796		2.05985	3.82422
				4.44909	2.73925		4.25676	0.54833		2.07308	3.79813
				4.47559	2.54428		4.28619	0.6305		2.08558	3.80426
				4.50359	2.52951		4.31627	0.84147		2.09786	3.9522
				4.53229	3.00206		4.34675	0.84817		2.11062	4.0816
				4.56166	3.27445		4.37699	0.87659		2.12374	4.17494
				4.59244	3.1803		4.40798	0.71144		2.1374	4.41844
				4.62314	2.99898		4.43953	0.63679		2.15165	4.27
				4.65431	3.18705		4.47072	0.52932		2.16582	4.19451
				4.68713	3.24706		4.50117	0.50052		2.18036	3.95358
				4.72092	3.07214		4.53123	0.3482		2.19466	3.93196
				4.75514	2.68245		4.56088	0.48356		2.20942	3.8413
				4.788	2.63246		4.58914	0.57248		2.22469	3.51216
				4.81947	2.84424		4.61704	0.58751		2.24004	3.42787
				4.85018	2.70689		4.64467	0.56535		2.25517	3.42147
				4.8796	2.3886		4.67064	0.52242		2.26984	3.39674
				4.90787	2.37759		4.69616	0.84923		2.284	3.1811
				4.93448	2.60335		4.72128	1.06053		2.2975	3.16049
				4.9611	2.61441		4.74697	1.05194		2.31087	3.34149
				4.98748	2.52002		4.77359	0.96569		2.32386	3.57509
				5.01328	2.45441		4.79995	1.01881		2.33616	3.40838
				5.03983	2.59417		4.82718	0.9681		2.34849	3.52965
				5.06651	2.87993		4.85529	0.85497		2.36074	3.92966
				5.09355	2.94564		4.88312	0.7908		2.37287	4.14689
				5.12173	2.87169		4.91098	0.80317		2.38539	4.18949
				5.14941	2.86909		4.93759	0.96149		2.39789	4.11729
				5.17704	3.02795		4.9629	0.96948		2.41049	4.11938
				5.20654	3.23777		4.98806	0.99845		2.42304	4.26493
				5.23675	3.324		5.01372	1.12201		2.43615	4.13697
				5.26581	3.29615		5.04008	1.26449		2.44911	4.02771
				5.29264	3.40008		5.06772	1.33709		2.46224	4.25189
				5.31897	3.57912		5.09654	1.41068		2.47515	4.23832
				5.34628	3.58028		5.12609	1.58007		2.48761	4.02218
				5.37448	3.41849		5.15607	1.60519		2.50037	3.88308
				5.40374	3.3415		5.18548	1.64981		2.51344	3.74892
				5.43372	3.5745		5.21514	1.61484		2.52673	3.75478
				5.46488	3.68016		5.24631	1.445		2.54061	3.91413
				5.49717	3.52119		5.27845	1.18984		2.55453	3.93244
				5.53	3.27137		5.30977	1.02628		2.56879	3.96126
				5.56365	3.3288		5.34089	0.91262		2.58276	3.93706
				5.5974	3.58076		5.3696	0.9398		2.59683	4.06661
				5.62992	3.43849		5.39944	0.84511		2.61154	4.21899
				5.66161	3.08984		5.4272	0.78821		2.62699	4.21004
				5.69293	2.95756		5.45302	0.87103		2.64256	4.06962
				5.72336	3.16264		5.47934	0.70734		2.65778	4.06999
				5.75235	3.20196		5.50606	0.585		2.67265	4.25987
				5.78046	3.05735		5.53185	0.55764		2.68715	4.2355
				5.80805	2.98003		5.55672	0.63648		2.70112	4.18551
				5.83489	3.21735		5.58289	0.66112		2.71397	4.24571
				5.86102	3.3585		5.60948	0.72777		2.72627	4.54978
				5.88611	3.23844		5.63629	0.91375		2.73853	4.46755
				5.91147	3.31838		5.66404	1.0443		2.75101	4.24157
				5.93709	3.48856		5.69181	1.20675		2.76309	4.21968
				5.96306	3.78405		5.71867	1.15441		2.77517	4.46984
				5.98983	3.90018		5.747	1.16076		2.78771	4.59115
				6.01767	3.96075		5.77541	1.25933		2.80021	4.51138
				6.04618	3.95844		5.80182	1.29409		2.81249	4.38803
				6.07485	4.1253		5.82681	1.23653		2.82507	4.51786
				6.10441	4.0237		5.85191	1.29173		2.83813	4.56701
				6.13313	3.86121		5.87837	1.40993		2.85126	4.41721
				6.16165	3.65865		5.90618	1.46524		2.8643	4.34264
				6.18901	3.55793		5.93654	1.40015		2.8765	4.29927
				6.21699	3.77629		5.96695	1.23567		2.88863	4.45822
				6.24625	3.87195		5.99656	1.14564		2.90132	4.33122
				6.27534	3.80097		6.02658	1.16965		2.91444	4.24016
				6.30513	3.49527		6.05761	1.11046		2.92739	4.10952
				6.33543	3.48573		6.08932	1.16315		2.94104	4.19982
				6.36668	3.49805		6.12165	1.28456		2.95526	4.25922
				6.39814	3.54138		6.15295	1.35825		2.96976	4.31706
				6.43063	3.49894		6.18316	1.26921		2.98426	4.20221
				6.46422	3.66989		6.21238	1.12367		2.9984	4.12676
				6.4969	3.93823		6.24089	1.21381		3.01286	4.27259
				6.52925	4.11667		6.26848	1.24486		3.02795	4.32739
				6.56095	3.90014		6.29479	1.24445		3.04311	4.29332
				6.5912	3.83703		6.3204	1.42114		3.05809	4.2139
				6.62005	4.09064		6.34635	1.59296		3.07281	4.41808
				6.64816	4.30632		6.37254	1.60303		3.0871	4.51684
				6.67609	4.29879		6.39797	1.61572		3.10081	4.48288
				6.70259	4.11711		6.42333	1.71644		3.11417	4.29408
				6.72882	4.24151		6.44892	1.7964		3.12721	4.51914
				6.7547	4.43784		6.47521	1.65453		3.14004	4.91038
				6.7807	4.3156		6.50227	1.57862		3.15245	4.96419
				6.80744	3.86217		6.52937	1.63085		3.16424	4.64929
				6.83425	3.71602		6.55767	1.72903		3.17617	4.49749
				6.86195	3.66842		6.58684	1.61349		3.18858	4.77196
				6.88995	3.79542		6.61371	1.51073		3.20108	4.81851
				6.9183	3.64954		6.63984	1.51193		3.21409	4.6635
				6.94717	3.43544		6.66519	1.66512		3.22741	4.66387
				6.97505	3.53434		6.69131	1.58903		3.24042	4.94749
				7.00231	3.70871		6.71816	1.50596		3.25352	4.99733
				7.03039	3.60167		6.74636	1.65058		3.26661	4.78469
				7.05788	3.48286		6.77584	1.62816		3.27898	4.77999
				7.08585	3.58609		6.80581	1.55244		3.29089	5.04505
				7.11442	3.98147		6.83541	1.38567		3.3032	5.39909
				7.14364	4.34539		6.86628	1.43151		3.31563	5.39898
				7.17354	4.15033		6.89833	1.45245		3.3287	5.32312
				7.20435	4.05214		6.93096	1.53999		3.34254	5.54319
				7.23535	4.20591		6.96336	1.44761		3.35699	5.60254
				7.26616	4.59033		6.99462	1.36388		3.37101	5.54764
				7.29779	4.42004		7.02489	1.33712		3.38516	5.47308
				7.33076	4.0991		7.05403	1.19206		3.39993	5.43046
				7.364	4.26741		7.08287	1.31824		3.41516	5.31131
				7.39598	4.49054		7.11061	1.2814		3.43042	5.30796
				7.42752	4.38075		7.13709	1.3152		3.44535	5.45388
				7.45853	3.8728		7.16239	1.23763		3.46028	5.40552
				7.4877	3.67827		7.18777	1.37965		3.47416	5.34666
				7.51653	3.939		7.21451	1.41342		3.48834	5.28404
				7.54453	4.1501		7.24045	1.4629		3.50145	5.34655
				7.5714	3.7513		7.26601	1.4873		3.51423	5.44242
				7.59756	3.5592		7.29229	1.53369		3.52668	5.32247
				7.62387	4.00809		7.31984	1.71975		3.5393	5.16272
				7.65009	4.15375		7.34687	1.53491		3.55224	5.64564
				7.6774	4.07681		7.37373	1.21058		3.56507	5.92943
				7.705	3.83704		7.40144	1.27743		3.57767	5.57647
				7.73178	3.94446		7.42845	1.39153		3.59058	5.32275
				7.75898	4.31948		7.45534	1.25076		3.60325	5.4928
				7.78676	4.23744		7.48248	0.99443		3.61603	5.58445
				7.81459	3.86054		7.50809	0.84006		3.6291	5.44202
				7.84159	3.87249		7.53396	0.87698		3.64247	5.20403
				7.86783	4.18312		7.56046	1.00879		3.65582	5.36975
				7.89434	4.26754		7.58913	0.80781		3.66861	6.01383
				7.9215	4.23785		7.61878	0.71234		3.68103	5.92337
				7.94924	4.24356		7.64845	1.15057		3.69304	5.68879
				7.97824	4.50186		7.67779	1.32188		3.70505	5.7777
				8.00779	4.99154		7.707	1.31633		3.71768	6.04794
				8.03713	5.11651		7.7374	1.27149		3.73125	5.89003
				8.0671	4.96661		7.76971	1.34773		3.74551	5.67558
				8.09931	4.99351		7.80266	1.51191		3.76034	5.82604
				8.13185	5.22482		7.83472	1.48717		3.7753	6.21145
				8.16447	5.23731		7.86549	1.2014		3.79033	6.2901
				8.19716	4.90462		7.89465	1.24103		3.80548	5.87605
				8.22968	4.57236		7.92253	1.38839		3.82071	5.56327
				8.2614	4.59228		7.95039	1.3951		3.83583	5.49265
				8.29284	4.71803		7.97682	1.31518		3.85054	5.45184
				8.32348	4.45474		8.00197	1.16499		3.86496	5.34515
				8.35297	3.98216		8.02784	1.00624		3.87939	5.41495
				8.38095	3.93717		8.05349	1.03906		3.8933	5.53766
				8.40795	4.36316		8.0787	0.95055		3.90622	5.60586
				8.43476	4.38368		8.10468	0.91951		3.91869	5.41185
				8.46135	4.16982		8.13076	0.99331		3.93106	5.43119
				8.48812	4.13073		8.15699	1.12314		3.94319	5.52924
				8.51522	4.47905		8.18446	1.30382		3.95525	5.71766
				8.54325	4.67766		8.21249	1.33565		3.96763	5.77117
				8.57121	4.47267		8.24089	1.22835		3.98009	5.85716
				8.59876	4.34015		8.26875	1.31353		3.99298	6.02222
				8.62591	4.50489		8.29597	1.6176		4.00636	6.02773
				8.65463	4.84681		8.32179	1.69309		4.01973	6.2533
				8.68346	4.72791		8.34774	1.76389		4.03285	6.28893
				8.71065	4.4626		8.37419	1.79227		4.04591	6.35586
				8.73728	4.4266		8.40115	2.00359		4.05903	6.31066
				8.76394	4.72633		8.42898	2.11228		4.07156	6.32963
				8.79125	4.89427		8.45722	2.04628		4.08423	6.38085
				8.81925	4.61005		8.48544	1.77761		4.09649	6.39795
				8.84831	4.4587		8.51416	1.61986		4.10929	6.39818
				8.87779	4.64741		8.54376	1.63668		4.12265	6.31924
				8.9073	4.81286		8.57375	1.52397		4.13631	6.4659
				8.93851	4.59299		8.60563	1.42738		4.15036	6.27591
				8.96919	4.27471		8.63776	1.3424		4.16486	6.04676
				9.00056	4.36785		8.66941	1.42832		4.17923	5.89959
				9.03346	4.69484		8.70088	1.43882		4.19348	5.99133
				9.06659	4.67131		8.73112	1.35754		4.20847	5.9098
				9.09813	4.41782		8.76019	1.20389		4.22394	5.67731
				9.1299	4.39201		8.78838	1.30214		4.23912	5.73629
				9.15956	4.6746		8.81527	1.44669		4.25419	5.87998
				9.19041	4.61929		8.84179	1.39868		4.26868	6.04746
				9.21898	4.68318		8.86767	1.44623		4.28284	6.05714
				9.24591	4.65401		8.89286	1.46798		4.29629	6.10504
				9.27353	4.8247		8.91787	1.56142		4.3091	6.24907
				9.30125	5.1238		8.94391	1.67291		4.32184	6.38275
				9.32782	5.20654		8.96959	1.56536		4.3345	6.38414
				9.35458	5.00003		8.9957	1.50411		4.34633	6.41369
				9.38186	4.75239		9.02183	1.45		4.35835	6.5885
				9.40982	4.98218		9.0484	1.61007		4.37088	6.6133
				9.43732	5.20778		9.07612	1.82078		4.38316	6.59197
				9.4655	5.37098		9.1045	1.83778		4.3961	6.5204
				9.49378	5.14376		9.13241	1.73778		4.40988	6.4033
				9.52215	5.3202		9.15824	1.8948		4.42339	6.53951
				9.55093	5.59488		9.18322	2.01987		4.43661	6.49489
				9.5798	5.50742		9.2099	1.88472		4.4501	6.49356
				9.60779	5.21099		9.23746	1.94686		4.46352	6.23423
				9.63367	5.20455		9.26497	2.01282		4.47644	6.32341
				9.65939	5.51081		9.29415	2.26345		4.48883	6.48216
				9.68683	5.4355		9.32386	2.20224		4.50091	6.58397
				9.71596	5.22144		9.35263	1.87672		4.51298	6.51732
				9.74699	4.95166		9.38178	1.81309		4.52564	6.5833
				9.77855	5.20876		9.41203	1.94363		4.539	6.80785
				9.80974	5.37001		9.44386	1.92381		4.55255	6.71536
				9.84108	5.19622		9.47577	1.86351		4.56686	6.50171
				9.87373	4.95073		9.50647	1.75903		4.58087	6.362
				9.90639	4.90322		9.53646	1.53828		4.59513	6.65813
				9.93936	5.182		9.56614	1.52607		4.61021	6.72838
				9.97153	5.28602		9.59569	1.53502		4.62596	6.59463
				10.0028	5.32182		9.6235	1.56665		4.64154	6.55928
				10.0331	5.18111		9.65054	1.6308		4.65701	6.77388
				10.063	5.40601		9.67663	1.78322		4.67194	6.82691
				10.0912	5.50732		9.70217	2.03012		4.68601	6.54096
				10.1183	5.50572		9.72811	2.1054		4.69978	6.43465
				10.1449	5.37672		9.75445	2.00539		4.7129	6.71257
				10.1715	5.44333		9.78005	2.04618		4.72548	6.89745
				10.199	5.7752		9.80641	2.38365		4.73786	6.91696
				10.2256	5.78674		9.83281	2.43566		4.74988	6.95309
				10.2517	5.48945		9.85897	2.08594		4.76199	7.24344
				10.2789	5.2204		9.88633	1.94875		4.77456	7.24726
				10.3067	5.36015		9.91485	2.13894		4.78709	7.07213
				10.3354	5.44189		9.94239	2.46583		4.7996	6.83299
				10.3643	5.38436		9.96901	2.38108		4.81239	6.89262
				10.3931	4.94916		9.99475	2.10221		4.82571	6.95518
				10.4218	5.1399		10.0208	2.00231		4.83904	6.96726
				10.4488	5.35981		10.0478	2.24036		4.85213	6.99071
				10.4755	5.2336		10.0752	2.11911		4.86547	7.0033
				10.5022	4.99411		10.1042	1.86427		4.8781	7.04003
				10.5291	4.87061		10.1345	2.16514		4.89034	6.83309
				10.5569	5.0826		10.1645	2.48789		4.90287	6.88041
				10.5861	5.28321		10.1946	2.65523		4.91524	6.88934
				10.617	5.33279		10.2247	2.39857		4.92786	6.98853
				10.6481	5.15156		10.2549	2.12905		4.94133	7.13662
				10.6792	5.4761		10.2853	2.28851		4.95532	7.34032
				10.711	5.50723		10.316	2.54327		4.9693	7.47112
				10.7436	5.59717		10.346	2.38435		4.98358	7.40898
				10.7766	5.43236		10.3758	2.22163		4.99792	7.47694
				10.8101	5.34118		10.4047	2.37432		5.01234	7.43908
				10.8425	5.53352		10.4332	2.44956		5.0274	7.38075
				10.8739	5.78147		10.4601	2.5286		5.04237	7.12633
				10.9046	5.57531		10.4861	2.32329		5.05748	7.16505
				10.9343	5.14088		10.5127	2.25247		5.07245	7.35802
				10.963	5.19438		10.5395	2.3808		5.08695	7.43715
				10.9897	5.29793		10.5649	2.65792		5.10124	7.27267
				11.0168	5.41086		10.5898	2.6806		5.11427	7.19059
				11.0441	4.99542		10.6145	2.50373		5.12699	7.34136
				11.0705	4.86143		10.6407	2.4838		5.1394	7.46785
				11.0968	5.07834		10.6675	2.68873		5.15182	7.50149
				11.1239	5.34947		10.6951	2.78309		5.16396	7.50351
				11.1523	5.12055		10.7232	2.45971		5.17639	7.72588
				11.1807	4.94338		10.7515	2.23886		5.18866	7.91046
				11.2085	5.1003		10.7789	2.27185		5.2009	7.92438
				11.2366	5.25478		10.8056	2.32466		5.21331	7.87675
				11.2649	5.16642		10.8322	2.10986		5.22594	7.94175
				11.2945	4.95277		10.8596	1.65665		5.23937	7.98608
				11.3225	5.16876		10.8883	1.78663		5.25289	7.94002
				11.3491	5.64073		10.917	2.16078		5.26651	7.77329
				11.3753	5.8207		10.9456	2.22224		5.27964	7.69719
				11.402	5.47067		10.9755	1.99201		5.29195	7.88804
				11.4309	5.23328		11.0057	1.91818		5.30415	7.9309
				11.4605	5.4207		11.0351	2.18956		5.31687	7.95918
				11.4905	5.72783		11.0648	2.28437		5.3299	7.97288
				11.5208	5.50863		11.0961	2.16748		5.34298	7.88529
				11.5517	5.34533		11.1275	2.01622		5.35682	7.97312
				11.5825	5.32907		11.159	2.32667		5.37106	7.99651
				11.6139	5.56314		11.1896	2.54907		5.38547	7.84535
				11.6472	5.48339		11.2193	2.44184		5.40017	7.6349
				11.6811	5.15188		11.2479	2.20944		5.41469	7.70933
				11.7134	5.04769		11.2761	2.14522		5.42946	7.63685
				11.7448	5.19633		11.3026	2.35106		5.44416	7.61097
				11.7752	5.30087		11.3284	2.3096		5.4584	7.47498
				11.8047	5.18085		11.3546	2.07077		5.47258	7.47439
				11.8331	5.23747		11.3803	1.96476		5.48694	7.73002
				11.8606	5.40944		11.4057	2.00667		5.50107	7.7962
				11.8871	5.73639		11.4316	2.10404		5.51462	7.63163
				11.9129	5.47918		11.4576	2.10156		5.52716	7.67746
				11.9391	5.23545		11.4836	1.8976		5.53987	7.90678
				11.9653	5.20022		11.5103	1.69431		5.5526	8.03663
				11.9921	5.4525		11.5375	1.85749		5.565	8.13245
				12.0204	5.64264		11.5647	2.04277		5.57716	8.24952
				12.0481	5.56031		11.5939	2.12159		5.58946	8.46621
				12.0756	5.33855		11.6213	2.05395		5.602	8.58359
				12.1045	5.47781		11.6479	2.30979		5.6146	8.44128
				12.1344	5.66112		11.6738	2.5721		5.62761	8.29106
				12.1633	5.50065		11.7011	2.63029		5.64053	8.27237
				12.1912	5.47241		11.7284	2.38523		5.6541	8.40384
				12.2186	5.43245		11.7553	2.49092		5.66812	8.46214
				12.2458	5.6857		11.7836	2.87766		5.68128	8.39925
				12.2728	5.78661		11.8133	2.88263		5.69423	8.41436
				12.3007	5.65024		11.8436	2.68955		5.70678	8.48978
				12.3292	5.58608		11.8744	2.50967		5.7194	8.45445
				12.359	5.70685		11.906	2.59628		5.73234	8.30218
				12.3893	5.59231		11.9383	2.5823		5.74581	8.1928
				12.42	5.3577		11.9707	2.47733		5.75991	8.0514
				12.4504	5.19806		12.0026	2.09598		5.77399	8.06991
				12.4811	5.32919		12.0325	2.02932		5.7882	8.07504
				12.5132	5.55811		12.0605	1.99893		5.80218	8.0896
				12.5451	5.5148		12.0884	2.09223		5.81639	8.04712
				12.5774	5.34768		12.1152	2.08973		5.83131	7.92107
				12.6098	5.26036		12.1385	1.97203		5.84635	7.91228
				12.642	5.32242		12.1592	2.1543		5.86109	7.92958
				12.6729	5.4846		12.1807	2.47834		5.87521	7.89354
				12.702	5.63806		12.2038	2.49468		5.88923	7.99745
				12.7292	5.58148		12.2277	2.32302		5.90267	8.27212
				12.756	5.67362		12.2535	2.28198		5.91555	8.6465
				12.7828	5.70395		12.2855	2.29388		5.92842	8.79902
				12.8101	5.70467		12.3241	2.5894		5.94077	8.70209
				12.837	5.73807		12.3587	2.52982		5.95328	8.77602
				12.8632	5.79077		12.3891	2.28236		5.96571	8.94249
				12.8903	5.874		12.4171	2.38587		5.97798	8.95123
				12.9177	5.90956		12.4436	2.57405		5.99067	8.75686
				12.9441	5.83794		12.4698	2.58686		6.00325	8.82418
				12.9718	5.67513		12.4956	2.28997		6.01608	8.83804
				13.0005	5.69234		12.5207	2.11164		6.02874	8.91488
				13.03	5.74683		12.5464	2.44517		6.04172	8.7963
				13.0581	5.63509		12.5724	2.70016		6.05531	8.62662
				13.1679	5.75564		12.5992	2.40897		6.06864	8.82544
				13.2574	5.69195		12.6274	2.08614		6.08179	8.8772
				13.3494	5.96156		12.6572	2.24025		6.09487	8.95082
				13.4462	6.35902		12.6871	2.43755		6.1076	8.81542
				13.5378	6.00498		12.7169	2.28809		6.12055	8.96447
				13.6474	6.07974		12.7471	1.72684		6.13392	9.0266
				13.7562	5.8612		12.7789	1.65089		6.14759	9.22881
				13.868	5.50833		12.8112	1.95087		6.16174	9.28775
				13.9803	5.51346		12.8432	1.96112		6.17646	9.31089
				14.0969	5.9262		12.8739	1.82664		6.19142	9.32702
				14.189	5.9192		12.9038	1.80726		6.2064	9.41827
				14.2847	5.71023		12.9324	2.00573		6.22163	9.42484
				14.3757	5.68208		12.9601	2.24053		6.23706	9.21626
				14.4883	5.7266		12.9869	2.07919		6.25224	9.17973
				14.5947	5.90543		13.0128	1.80418		6.26678	9.22708
				14.7085	5.78144		13.0382	2.10712		6.28082	9.47217
				14.7957	6.00667		13.0626	2.32574		6.29454	9.38583
				14.9042	6.10704		13.0872	2.34713		6.30791	9.09544
				14.9927	6.72572		13.1126	2.35184		6.32062	9.06389
				15.1017	6.49809		13.1385	2.26465		6.33275	9.3385
				15.2026	7.07995		13.1647	2.31869		6.3451	9.2321
				15.2993	6.52184		13.191	2.46584		6.35738	8.90519
				15.4023	6.73244		13.2177	2.23534		6.36956	8.95855
				15.5052	6.66127		13.2458	1.92262		6.3822	9.28535
				15.6143	6.82865		13.2742	1.77895		6.39462	9.47366
				15.721	6.90736		13.3018	1.89053		6.40736	9.27151
				15.837	6.50879		13.3281	1.90893		6.42051	9.0638
				15.934	6.05043		13.3533	1.6811		6.43331	9.3305
				16.0341	6.00208		13.3792	1.45174		6.44615	9.44296
				16.1249	6.37966		13.4062	1.6526		6.4595	9.22755
				16.234	6.92901		13.4334	1.81174		6.47312	9.02997
				16.3385	7.05608		13.4586	1.70428		6.48594	9.24085
				16.448	6.62999		13.4823	1.56563		6.49817	9.43422
				16.5513	6.54172		13.5059	1.78261		6.51063	9.37449
				16.6482	7.07034		13.5304	2.26104		6.52338	9.32279
				16.7427	7.0875		13.5559	2.69332		6.53657	9.32722
				16.8781	6.73687		13.5836	2.67275		6.55035	9.65069
				16.9882	6.69874		13.6147	2.51751		6.56448	9.70138
				17.0882	6.75894		13.7273	2.35065		6.57911	9.66814
				17.1875	6.72635		13.813	2.25234		6.59449	9.70716
				17.2949	6.90382		13.9148	1.94662		6.60986	9.77679
				17.4055	7.16746		14.0097	2.30161		6.62527	9.97295
				17.514	7.03822		14.1156	2.39748		6.64097	10.0628
				17.6053	7.02885		14.2176	2.5279		6.65643	10.0121
				17.7	7.11318		14.3278	2.77187		6.67099	9.83551
				17.7986	6.9153		14.4172	2.52701		6.68473	9.90291
				17.8905	6.51577		14.5119	1.79709		6.69845	9.88107
				17.9926	6.55411		14.603	2.02286		6.71192	9.68783
				18.082	6.84132		14.7101	2.03244		6.72443	9.5305
				18.1928	7.40166		14.8127	2.30709		6.73681	9.63531
				18.3024	7.51033		14.9147	2.54818		6.74904	9.77952
				18.3981	6.93269		15.0029	2.86153		6.76082	9.75074
				18.5133	6.73306		15.0895	2.93614		6.77278	9.54628
				18.6069	6.91725		15.2036	3.18734		6.78514	9.47401
				18.7	7.33038		15.3018	2.56993		6.79787	9.69876
				18.8123	7.67296		15.3883	2.57076		6.8104	9.79137
				18.9167	8.04669		15.4989	2.36257		6.82328	9.58973
				19.0262	7.80484		15.5977	2.92824		6.83661	9.53655
				19.138	7.47145		15.7049	3.36642		6.85001	9.82922
				19.2479	7.83005		15.8106	3.56575		6.86337	10.0624
				19.3394	7.69879		15.9156	3.03446		6.87648	10.1129
				19.4348	7.61282		16.013	2.33474		6.88906	10.1433
				19.5272	7.41977		16.1044	2.45696		6.90157	10.3224
				19.6199	7.74092		16.1966	2.85194		6.91422	10.5368
				19.7304	8.06129		16.2821	2.74172		6.92674	10.3885
				19.8391	7.79912		16.3868	3.10474		6.93989	10.2894
				19.9522	7.5279		16.4918	2.68902		6.95359	10.4401
				20.0587	7.84285		16.6011	2.52474		6.96777	10.6125
				20.1483	8.00437		16.7054	2.70232		6.98216	10.5498
				20.2425	8.19763		16.8177	3.0454		6.99662	10.1937
				20.3414	7.69676		16.9098	2.59301		7.01175	10.2475
				20.4342	7.44748		17.0063	2.67191		7.02737	10.1436
				20.5448	7.67798		17.0937	2.87894		7.04322	10.0244
				20.6537	7.51319		17.2011	2.67519		7.0588	9.8524
				20.7656	7.37338		17.3065	2.50981		7.07376	9.8391
				20.8769	7.64931		17.4148	2.35057		7.08829	9.71576
				20.9896	7.55202		17.5218	2.30621		7.10196	9.66148
				21.0848	7.34416		17.6308	2.70761		7.11525	9.70165
				21.1822	7.43459		17.7172	2.82064		7.12772	9.70954
				21.2769	7.16849		17.8113	2.98677		7.13993	9.87058
				21.3909	7.49978		17.9032	2.5549		7.15216	9.93352
				21.4971	7.79083		17.9882	2.32026		7.16447	10.0475
				21.6101	8.02947		18.0929	2.67933		7.17672	10.1017
				21.7227	8.24046		18.1971	2.95435		7.1888	10.0986
				21.8313	8.46791		18.3086	3.06366		7.20116	10.1795
				21.9216	8.14023		18.4138	2.73161		7.21392	10.4182
				22.0164	7.80387		18.5251	2.49439		7.22672	10.6144
				22.1134	7.80096		18.6167	2.27039		7.23963	10.7364
				22.2039	7.97819		18.7108	2.27942		7.25326	10.7907
				22.3126	8.39388		18.8005	2.43778		7.26614	10.963
				22.4217	8.38343		18.9061	2.66307		7.27859	10.9507
				22.536	8.11154		19.0083	2.83761		7.29105	10.7363
				22.6455	7.91911		19.1178	2.54278		7.30376	10.4934
				22.7599	7.69659		19.2238	2.38233		7.31635	10.5167
				22.8519	8.17052		19.335	2.80077		7.32905	10.6599
				22.9497	8.15941		19.4227	2.59284		7.34226	10.6746
				23.0438	8.10327		19.5173	2.65044		7.3561	10.5238
				23.1552	8.0581		19.6075	2.65578		7.37021	10.5306
				23.2625	7.74929		19.7156	3.10918		7.38417	10.5314
				23.3726	8.23957		19.8183	3.07452		7.3981	10.3935
				23.4857	8.45483		19.926	2.85027		7.41219	10.2301
				23.5974	8.91183		20.0353	3.16997		7.42728	10.2817
				23.688	8.71271		20.1424	3.38798		7.44327	10.4826
				23.7848	8.48041		20.233	3.57726		7.459	10.6652
				23.8804	8.66203		20.3251	3.44186		7.47421	10.6604
				23.9679	8.44807		20.4157	3.00755		7.48886	10.7013
				24.0741	8.389		20.4998	2.74402		7.50319	10.8675
				24.183	8.35411		20.604	2.66543		7.51661	10.8786
				24.2967	8.6339		20.7086	2.88019		7.52938	10.8941
				24.407	9.01633		20.8192	2.95915		7.54195	10.8747
				24.4958	9.14816		20.9257	3.2398		7.55408	10.9491
				24.5888	9.11529		21.0138	3.53097		7.56598	11.1666
				24.6852	8.57196		21.1037	3.47139		7.57802	11.431
				24.7769	8.60762		21.199	2.79084		7.59028	11.5631
				24.8891	8.82221		21.2884	2.78554		7.60278	11.518
				24.9951	9.06113		21.3932	3.05349		7.61521	11.4357
				25.1057	9.04649		21.4972	3.33532		7.62786	11.3364
				25.1937	9.20389		21.6052	3.24075		7.64072	11.2525
				25.2986	8.96379		21.7133	3.46739		7.6538	11.0236
				25.3976	8.84915		21.8236	3.26366		7.667	10.9223
				25.4958	8.6173		21.915	2.71217		7.68003	10.9605
				25.5926	8.57153		22.0123	2.47053		7.69242	10.9852
				25.6795	8.79547		22.1032	2.68454		7.705	10.781
				25.7862	9.22908		22.2103	3.35748		7.71753	10.5699
				25.8952	9.27339		22.3108	3.67704		7.73037	10.6332
				26.0085	9.1377		22.4176	3.35751		7.74353	10.795
				26.1182	8.74826		22.5025	3.19346		7.75737	10.8523
				26.2359	8.91195		22.6065	3.09432		7.77146	10.7466
				26.3346	8.68287		22.6925	3.14385		7.78591	10.9566
				26.4349	8.78775		22.7841	2.95275		7.80053	11.221
				26.5248	8.84498		22.8809	3.04645		7.81495	11.3483
				26.6317	8.94556		22.9709	3.13619		7.8299	11.3167
				26.7349	8.96728		23.0751	3.28251		7.8449	11.3916
				26.8472	8.77648		23.1765	3.16117		7.85987	11.5351
				26.936	8.79894		23.286	3.21008		7.87479	11.4753
				27.0477	9.09758		23.3926	3.34666		7.88938	11.4101
				27.1372	9.65116		23.5027	3.59459		7.90355	11.3336
				27.2361	9.5695		23.591	3.50096		7.91728	11.5237
				27.3347	8.96503		23.6862	3.30656		7.92983	11.6282
				27.4232	8.70306		23.7791	3.15203		7.94208	11.4388
				27.5281	8.61904		23.8636	3.08398		7.95441	11.2831
				27.6338	8.93388		23.965	3.44579		7.96646	11.2138
				27.7478	9.30799		24.0685	3.62221		7.9787	11.2263
				27.8588	9.70024		24.1751	3.72778		7.99127	11.1946
				27.946	9.52814		24.2819	3.82344		8.00385	11.0978
				28.0371	9.42635		24.3683	3.7936		8.01687	10.9611
				28.1355	9.42669		24.4571	3.45559		8.03011	10.9308
				28.232	9.32867		24.5526	3.10558		8.04305	10.9265
				28.3451	9.51744		24.6433	2.93698		8.05604	10.9241
				28.4505	9.42571		24.7502	3.5413		8.06955	10.943
				28.5588	9.56109		24.8539	3.77494		8.08292	11.1307
				28.6672	9.81546		24.9627	3.6215		8.09548	11.452
				28.7806	9.74571		25.0665	3.20372		8.1076	11.7034
				28.8727	9.59802		25.1766	3.70715		8.11988	11.6067
				28.9689	9.59552		25.2665	3.62136		8.13256	11.6683
				29.0649	9.70381		25.3584	3.61172		8.14557	11.9698
				29.1549	9.95439		25.4492	3.73269		8.1595	12.2189
				29.2637	9.77106		25.5333	3.74466		8.1737	12.2222
				29.3712	9.84576		25.6368	4.07204		8.18767	12.1243
				29.4841	9.50797		25.7447	3.98933		8.20201	12.267
				29.5913	9.68777		25.8536	4.14364		8.21678	12.4354
				29.68	9.86798		25.9579	3.79192		8.2316	12.2148
				29.7729	9.87017		26.0471	4.10471		8.24644	11.8833
				29.868	9.82958		26.1379	3.76289		8.26132	11.9527
				29.9618	9.41328		26.2331	3.52462		8.27559	12.1445
				30.0767	9.43974		26.3212	3.65887		8.28966	12.0548
				30.1843	9.53551		26.4274	3.74299		8.30414	11.9582
				30.295	9.56523		26.5303	4.33186		8.31761	12.0749
				30.407	10.0875		26.6398	4.06877		8.33092	12.1182
				30.519	10.4265		26.7453	4.23701		8.34367	12.1385
				30.6118	10.5737		26.8592	3.98125		8.35595	11.8269
				30.7091	9.977		26.9491	4.17588		8.36786	11.6889
				30.8047	9.82209		27.0439	3.73784		8.38026	11.7568
				30.8924	9.51607		27.1342	3.45318		8.3927	11.7864
				30.9996	9.57011		27.2403	3.38901		8.40538	11.705
				31.109	9.70852		27.3446	3.66819		8.41843	11.6406
				31.1962	9.66044		27.4557	3.78082		8.43118	11.6598
				31.3036	9.60734		27.5622	4.02793		8.44443	11.7482
				31.3912	9.71217		27.6719	3.91046		8.45815	11.819
				31.4843	9.54409		27.7602	3.57717		8.47149	11.7631
				31.582	9.3354		27.8525	3.79455		8.48398	11.7666
				31.6767	9.26488		27.9448	3.69869		8.49622	11.8816
				31.7898	9.4951		28.0544	4.05666		8.50837	12.0614
				31.8972	9.98705		28.1581	4.25166		8.52068	12.311
				32.0113	9.64937		28.266	4.28081		8.53347	12.3961
				32.1242	9.43617		28.3733	3.77858		8.54738	12.4882
				32.2333	9.16446		28.4796	3.52061		8.5618	12.7099
				32.3238	9.48571		28.5675	3.67443		8.57603	12.6408
				32.419	9.60984		28.6569	3.72394		8.59058	12.518
				32.5159	9.60983		28.7504	4.10185		8.60555	12.3529
				32.6065	9.66587		28.8384	4.15296		8.62057	12.4777
				32.713	9.86483		28.9453	3.98199		8.63569	12.6138
				32.8223	9.99009		29.0475	3.62405		8.65078	12.6044
				32.9358	9.93145		29.1564	3.50749		8.66565	12.3437
				33.0449	9.89757		29.2612	3.67014		8.68034	12.2622
				33.1608	10.2529		29.3746	4.12161		8.69463	12.3645
				33.2525	10.0057		29.463	4.23734		8.70823	12.1683
				33.3504	9.72071		29.5572	4.04434		8.72111	11.9589
				33.4439	9.17881		29.6471	3.68188		8.73374	11.9947
				33.5558	8.93281		29.7561	3.91034		8.74602	12.3496
				33.6625	8.93183		29.8596	4.24803		8.75856	12.5264
				33.7729	9.31796		29.9666	4.25695		8.77136	12.531
				33.885	10.0942		30.0744	4.32027		8.78391	12.5253
				33.9976	10.4963		30.1832	4.65295		8.79618	12.7337
				34.0885	10.3176		30.2725	4.19761		8.80885	12.8214
				34.1853	10.0234		30.3659	4.26178		8.82195	12.6518
				34.2799	9.94192		30.4566	4.26101		8.83485	12.7038
				34.3686	9.96051		30.5661	4.31853		8.84784	12.8971
				34.4763	10.312		30.67	4.34481		8.86144	13.0696
				34.5843	10.2066		30.7759	4.48124		8.8749	12.994
				34.6981	10.3567		30.8863	4.59998		8.88753	12.8668
				34.8075	10.1333		30.9948	4.39551		8.89993	12.8654
				34.8974	10.3099		31.0828	4.11591		8.91233	12.7169
				34.9905	9.9555		31.1778	3.79025		8.92474	12.7517
				35.0869	9.81257		31.272	4.14802		8.9378	12.9026
				35.1786	10.3039		31.3564	4.44018		8.95164	12.9733
				35.2892	10.7332		31.4588	4.65129		8.96601	12.8821
				35.3955	10.9864		31.5634	4.63892		8.98009	12.8393
				35.5077	10.8659		31.6742	4.10838		8.99431	12.9204
				35.6196	10.6396		31.7801	3.87007		9.00911	12.8013
				35.7372	10.5216		31.8648	4.15039		9.02437	12.7993
				35.8298	10.4079		31.9577	4.41215		9.03981	12.8301
				35.9301	10.6561		32.0532	4.00628		9.05513	13.1567
				36.0235	10.4301		32.1435	3.69349		9.06981	13.0619
				36.135	10.3473		32.2505	3.75589		9.08408	12.8635
				36.2405	10.6573		32.3514	4.00149		9.09833	12.8238
				36.3528	9.95164		32.451	4.22407		9.11189	12.9508
				36.4658	10.1836		32.5402	4.38079		9.12503	13.1321
				36.5764	10.872		32.6487	4.7499		9.13731	12.9085
				36.6701	11.1107		32.7331	4.73934		9.14979	12.9277
				36.7701	10.734		32.8258	4.61174		9.16188	13.0414
				36.8656	10.1633		32.9233	3.9253		9.17389	13.1937
				36.9797	10.4498		33.0117	3.76663		9.18643	13.0186
				37.0863	10.8018		33.1145	3.95406		9.19926	12.9608
				37.1937	11.0946		33.2174	4.27167		9.21216	12.9743
				37.3054	11.3726		33.327	4.48719		9.2251	13.0601
				37.4165	11.3088		33.4334	4.47255		9.23873	13.0424
				37.5078	10.8839		33.5434	4.36783		9.25232	13.004
				37.6061	10.8282		33.6325	4.03724		9.26535	13.2081
				37.7058	10.3625		33.7269	4.30416		9.27872	13.3068
				37.7961	10.2528		33.8261	4.6933		9.29187	13.3406
				37.902	10.6842		33.9115	4.53807		9.30411	13.2016
				38.0088	11.482		34.0161	4.42534		9.31587	13.1072
				38.1217	11.4761		34.1173	4.0573		9.32799	13.0344
				38.2312	10.8989		34.2213	4.62913		9.34086	13.0081
				38.3454	10.9321		34.3258	4.45094		9.35445	13.2307
				38.4368	11.1043		34.4115	4.47325		9.36881	13.1858
				38.5375	11.0468		34.5006	4.43664		9.38257	13.0674
				38.6344	11.3806		34.5933	4.50195		9.39634	12.9625
				38.7464	11.2367		34.6855	4.46361		9.41086	13.1473
				38.8499	11.1927		34.7904	4.41348		9.42644	12.9333
				38.9596	10.921		34.8921	4.51759		9.44211	12.7681
				39.0691	11.0558		35.0012	4.15667		9.45754	12.6154
				39.1829	11.3043		35.104	4.00986		9.47277	12.8925
				39.2737	11.1816		35.196	5.00439		9.4877	13.1133
				39.3684	11.2123		35.2874	4.92917		9.50201	12.8497
				39.4637	11.2907		35.4094	4.88887		9.5155	12.7838
				39.5551	10.9636		35.5033	4.3574		9.52842	12.8574
				39.6636	11.0813		35.6052	4.35833		9.54112	12.996
				39.772	11.0324		35.7081	4.45495		9.55355	12.5754
				39.8858	10.8451		35.8143	4.34691		9.56558	12.3771
				39.9923	11.2982		35.9188	4.63542		9.57756	12.37
				40.0807	11.3395		36.0296	4.7142		9.58992	12.8197
				40.1723	11.5365		36.1208	4.53425		9.60235	12.7402
				40.2698	11.5634		36.2137	4.14843		9.61513	12.5084
				40.3622	11.0267		36.3022	3.94093		9.62818	12.526
				40.4759	10.74		36.4092	3.76063		9.64121	12.8148
				40.5849	10.6595		36.5096	4.11514		9.65436	12.8502
				40.6977	11.117		36.6171	4.18796		9.66759	12.7651
				40.8064	11.2986		36.7053	4.54095		9.6805	12.8429
				40.9221	11.4088		36.8112	4.67349		9.69334	13.2255
				41.0143	11.0885		36.8999	4.34465		9.70614	13.6644
				41.1108	10.581		36.9983	4.16115		9.71882	13.6083
				41.2045	11.363		37.089	4.15942		9.73202	13.4554
				41.3172	11.6256		37.1775	4.66984		9.74501	13.4357
				41.4273	12.1305		37.2786	5.00208		9.75814	13.7288
				41.5372	11.78		37.3869	4.95085		9.77195	13.7089
				41.6477	11.6188		37.473	4.44677		9.78589	13.5833
				41.7616	11.0428		37.5784	4.06248		9.79967	13.423
				41.8554	11.2473		37.6836	4.36477		9.81356	13.5702
				41.9555	11.7016		37.7702	4.89905		9.82816	13.6351
				42.0515	11.8426		37.8633	5.12257		9.84361	13.4675
				42.1634	11.9187		37.9584	4.87505		9.85876	13.3238
				42.2701	11.7334		38.0433	4.63853		9.87349	13.3471
				42.3828	11.5128		38.1454	4.28374		9.88827	13.6209
				42.4702	11.1997		38.251	4.23923		9.90261	13.3503
				42.576	11.6776		38.3608	4.24208		9.9162	13.0448
				42.6638	12.1324		38.4664	4.49801		9.92953	13.1197
				42.7557	12.0904		38.579	5.10996		9.94216	13.4545
				42.8553	11.7973		38.6672	4.60428		9.95448	13.6652
				42.9507	11.3106		38.7613	4.43617		9.9671	13.5591
				43.0615	11.405		38.8523	4.19579		9.9794	13.3853
				43.1668	11.4798		38.9582	4.54986		9.99146	13.5427
				43.2786	11.612		39.0615	4.6901		10.004	13.8402
				43.3918	12.0783		39.1679	4.70281		10.0165	13.6756
				43.5028	12.4078		39.2766	4.73532		10.029	13.7172
				43.5916	12.11		39.3879	4.89125		10.0417	13.9642
				43.6873	11.8244		39.4753	4.7243		10.0545	14.226
				43.7853	11.9102		39.5667	4.43828		10.0681	14.2149
				43.8751	11.6368		39.6587	4.33479		10.0818	14.0157
				43.9832	11.8835		39.7434	4.32432		10.0952	14.1056
				44.0898	12.1631		39.8473	5.03245		10.1077	14.4574
				44.2034	12.147		39.9507	5.31982		10.12	14.5298
				44.3143	11.8572		40.0611	5.56932		10.1326	14.2843
				44.4308	11.8864		40.1669	4.8302		10.1458	14.2385
				44.5228	12.0388		40.253	4.73678		10.1598	14.3992
				44.6183	12.0766		40.3442	4.23645		10.1737	14.4644
				44.7107	12.3745		40.4367	4.31686		10.1876	14.2786
				44.8224	12.5173		40.523	4.51807		10.2021	14.2033
				44.9293	12.2802		40.632	4.79336		10.2164	14.1984
				45.0413	12.455		40.7368	4.99526		10.231	14.3702
				45.1534	12.0566		40.8454	4.80276		10.2462	14.1708
				45.2678	12.6333		40.9518	4.57373		10.261	14.0306
				45.3607	12.2722		41.0629	4.77351		10.2755	13.9647
				45.4557	12.566		41.1558	4.83676		10.2896	13.9833
				45.5474	12.5811		41.2515	4.71209		10.3034	14.05
				45.6607	12.4117		41.3397	5.13269		10.3172	14.1111
				45.7691	12.4327		41.4464	4.99737		10.3305	14.0588
				45.8802	12.332		41.55	5.05139		10.3434	14.0353
				45.9934	12.26		41.6556	4.47973		10.356	14.303
				46.1069	12.4879		41.7418	4.75808		10.3683	14.172
				46.2008	12.5028		41.8464	5.34911		10.3809	14.1077
				46.3002	12.2991		41.9352	5.68221		10.3933	14.0493
				46.3946	12.0579		42.0298	5.25065		10.4057	14.3319
				46.5067	11.7795		42.1237	4.71554		10.4185	14.5221
				46.6131	11.8475		42.2095	4.92855		10.4311	14.3131
				46.7229	12.5165		42.3129	5.24809		10.4439	14.1846
				46.8325	12.757		42.4159	5.37794		10.4572	14.4592
				46.9483	12.4083		42.5285	5.37108		10.4706	14.682
				47.0423	11.8057		42.6343	5.3486		10.4838	14.5982
				47.1408	11.7286		42.7454	5.0754		10.4965	14.4564
				47.2371	11.7056		42.8354	5.04154		10.5089	14.6977
				47.3257	11.6966		42.9322	5.16747		10.5212	14.9055
				47.4311	11.805		43.0234	4.88594		10.5338	14.7204
				47.5379	12.0082		43.1286	5.31287		10.5471	14.5194
				47.6258	12.1423		43.2291	5.34037		10.5606	14.5088
				47.737	12.2495		43.3368	5.26829		10.5745	14.7248
				47.8482	12.2471		43.4457	4.70701		10.5886	14.6322
				47.9387	12.0362		43.5532	5.06375		10.6032	14.4671
				48.0405	11.8974		43.6411	5.20711		10.6181	14.3528
				48.1376	12.1403		43.7347	5.12722		10.6332	14.6142
				48.2497	12.5756		43.8299	5.23061		10.6483	14.5143
				48.3524	12.4136		43.9162	4.79692		10.663	14.5146
				48.4655	11.9552		44.0194	4.81459		10.6776	14.4897
				48.5763	11.9514		44.1209	4.65196		10.6919	14.4697
				48.6881	12.3148		44.2298	5.05055		10.7058	14.7909
				48.7778	12.4575		44.3352	5.63658		10.7187	14.8295
				48.87	12.3118		44.4203	5.86419		10.7315	14.7988
				48.9707	12.0125		44.5094	5.5397		10.7443	14.8016
				49.0642	11.8498		44.6028	5.23536		10.7565	14.8503
				49.1706	12.301		44.6951	5.35211		10.7689	14.8824
				49.2759	12.5361		44.8035	5.38515		10.7812	14.9233
				49.3888	12.5299		44.9058	5.31624		10.7939	14.8423
				49.4972	12.521		45.0133	5.1667		10.8066	15.0097
				49.5848	12.3179		45.1188	5.35934		10.8194	15.2782
				49.6762	12.5945		45.2293	5.56317		10.8323	15.0775
				49.7714	12.5114		45.3186	5.64474		10.8453	14.7391
				49.8675	12.0394		45.4093	5.27761		10.8585	14.5625
				49.9569	12.2275		45.4994	4.86181		10.8722	14.5137
				50.0645	12.2827		45.5835	4.86316		10.8859	14.6561
				50.1714	12.9394		45.6903	5.15435		10.8991	14.4949
				50.2847	13.0489		45.7975	5.5227		10.9114	14.3844
				50.3926	12.7793		45.9059	5.45459		10.9237	14.5503
				50.4812	12.3712		46.0075	5.04229		10.9365	14.8162
				50.574	12.1022		46.0978	5.04775		10.9498	14.8322
				50.6713	12.4399		46.1907	4.90028		10.9638	14.8078
				50.7633	12.3608		46.285	5.16164		10.9778	14.8585
				50.8759	12.7382		46.3727	5.44839		10.9922	15.1267
				50.9837	12.7301		46.4786	5.5736		11.0071	15.2607
				51.096	12.4342		46.586	5.78937		11.022	15.1564
				51.2056	12.7841		46.695	5.25335		11.0374	15.2008
				51.3211	13.0059		46.7985	5.19616		11.0527	15.2835
				51.4157	13.0628		46.9108	5.41955		11.0679	15.1896
				51.5142	12.6532		47.0001	5.45642		11.0826	14.9136
				51.6071	12.9921		47.095	5.60821		11.0969	14.8057
				51.7191	12.7917		47.1855	5.51786		11.1108	14.9621
				51.8286	12.7788		47.2938	5.32263		11.1237	15.2124
				51.9431	12.7443		47.3975	5.17872		11.1362	15.2775
				52.0508	12.7747		47.5066	4.74395		11.1484	15.363
				52.1622	12.8928		47.6124	5.34107		11.1607	15.4438
				52.2556	13.0943		47.721	5.42607		11.173	15.5919
				52.3525	13.3734		47.8102	5.63403		11.1852	15.621
				52.4492	13.0966		47.9026	5.57675		11.1975	15.7372
				52.5364	12.7992		47.9959	5.18804		11.2098	15.6729
				52.6442	12.4273		48.0811	5.08081		11.2224	15.6224
				52.755	12.6387		48.1846	4.94436		11.2353	15.5357
				52.8673	12.9992		48.2903	5.52198		11.2485	15.5724
				52.9756	13.3182		48.4024	5.67222		11.2619	15.5251
				53.0928	13.2919		48.5062	5.71774		11.2757	15.2932
				53.1891	12.6932		48.6177	5.63547		11.2893	15.2591
				53.288	12.815		48.7084	5.41457		11.3019	15.3402
				53.379	13.0762		48.8031	5.35322		11.3141	15.3342
				53.4868	13.2761		48.8915	5.20581		11.3267	15.2093
				53.5944	13.3755		48.9975	5.79166		11.3397	15.3823
				53.7097	13.2605		49.1006	5.87066		11.3534	15.7761
				53.8209	13.3261		49.2079	5.50135		11.3675	16.068
				53.9343	13.0797		49.3163	5.04678		11.3819	15.9014
				54.0249	12.968		49.4262	5.32271		11.3965	15.7073
				54.1223	12.7294		49.5144	5.2646		11.411	15.9038
				54.2171	12.9115		49.6059	5.52199		11.4261	15.8501
				54.3284	13.3874		49.697	5.4871		11.4413	15.576
				54.435	13.4068		49.8044	5.50693		11.4568	15.4107
				54.5474	13.1855		49.9069	5.60155		11.4719	15.4847
				54.6588	12.7257		49.9922	5.16536		11.4866	15.5765
				54.7699	13.2755		50.077	5.47656		11.5005	15.4442
				54.8598	13.2695		50.1803	5.26108		11.5141	15.1618
				54.9556	13.6226		50.2652	5.9032		11.5273	15.1473
				55.05	13.3029		50.3564	5.79614		11.54	15.233
				55.1406	12.7686		50.4477	5.10863		11.5524	15.2912
				55.2478	12.7282		50.5368	5.58077		11.5645	15.2939
				55.3576	12.7134		50.6444	5.35974		11.5767	15.3797
				55.4719	12.9017		50.7474	5.89765		11.5889	15.5276
				55.5815	13.1419		50.8556	5.93476		11.6011	15.5706
				55.6693	13.4686		50.9396	6.29796		11.6137	15.6632
				55.7634	13.3562		51.0462	6.2007		11.6265	15.5689
				55.8598	13.3061		51.1365	6.33882		11.6392	15.494
				55.9503	13.4718		51.2291	6.04651		11.6525	15.5585
				56.0618	13.1715		51.3222	5.51486		11.6661	15.8638
				56.1688	13.3795		51.4084	5.59549		11.6795	15.8748
				56.2807	13.4696		51.5103	5.61301		11.6929	15.8591
				56.3931	14.3314		51.6152	6.24758		11.7056	15.8872
				56.5081	13.9155		51.7247	6.12095		11.7177	16.0289
				56.6038	13.6089		51.8307	6.20669		11.7299	16.0429
				56.7025	13.2817		51.915	6.19793		11.7427	15.8497
				56.7963	13.0125		52.0077	6.28407		11.7561	15.8555
				56.9067	13.2733		52.1044	6.01133		11.7698	16.1809
				57.0133	13.5345		52.1961	5.77363		11.7837	16.3227
				57.124	13.8318		52.3037	6.20055		11.7981	16.068
				57.2383	13.6084		52.4037	6.27901		11.813	15.9216
				57.3491	13.708		52.512	6.20707		11.8281	15.9442
				57.4422	13.5573		52.6213	5.89019		11.8437	16.0004
				57.5409	13.8936		52.7272	5.95911		11.8591	15.9986
				57.6377	13.6773		52.8141	5.95484		11.8741	15.8513
				57.7261	13.2737		52.9095	5.89336		11.8888	16.0734
				57.8313	13.4195		53.0041	5.97139		11.9032	16.2417
				57.9386	13.6375		53.0913	6.02516		11.917	16.242
				58.0526	13.6986		53.1935	5.5336		11.9305	16.0889
				58.1644	13.6034		53.2973	5.56425		11.943	16.0672
				58.2788	13.8621		53.4071	5.41104		11.955	16.0297
				58.3769	13.9861		53.5112	5.90188		11.9672	16.2175
				58.4747	14.0555		53.5951	6.16848		11.9795	16.3534
				58.566	13.5979		53.6838	6.13025		11.9914	16.3994
				58.678	13.053		53.7782	6.22049		12.0039	16.5512
				58.784	13.2242		53.872	5.48451		12.0166	16.4838
				58.8968	13.6746		53.9565	5.36336		12.0292	16.4717
				59.0046	14.1141		54.0573	5.68103		12.0421	16.2251
				59.1184	14.1485		54.156	6.11517		12.0554	16.1313
				59.2106	14.1879		54.2429	6.28223		12.0688	16.123
				59.3082	13.6158		54.3485	6.29404		12.082	16.4832
				59.4061	13.33		54.4609	6.22269		12.0948	16.3842
				59.5188	13.7572		54.5513	6.1748		12.1073	16.078
				59.6238	14.1125		54.644	5.87975		12.1197	15.9601
				59.7335	13.9716		54.7348	5.66899		12.1326	16.1981
				59.842	13.7916		54.8417	6.12558		12.1457	16.2038
				59.938	14.5496		54.9449	6.39496		12.1591	15.9778
				60.0468	14.3726		55.053	6.70906		12.1724	15.9478
				60.1399	14.3122		55.1574	6.05277		12.1861	16.2161
				60.2556	14.0029		55.2687	6.43356		12.2004	16.3972
				60.3652	13.491		55.3583	5.6431		12.2147	16.3173
				60.4675	13.7653		55.4637	5.82989		12.2297	16.3828
				60.575	13.8888		55.5692	5.88857		12.2451	16.4619
				60.6852	13.7846		55.6874	6.31507		12.2607	16.509
				60.7945	13.1395		55.7721	6.2746		12.2759	16.2618
				60.8828	13.0322		55.87	5.89795		12.2905	16.0983
				60.9768	13.186		55.9728	6.15318		12.305	16.1214
				61.0735	13.472		56.0824	5.72215		12.3191	16.4387
				61.1633	13.7806		56.1758	6.48481		12.3323	16.4801
				61.2715	14.285		56.2695	6.29864		12.3448	16.5113
				61.3802	14.3623		56.3591	6.03492		12.3573	16.5301
				61.4759	14.4207		56.4668	6.0181		12.3696	16.6039
				61.592	13.85		56.5731	6.00191		12.3817	16.8445
				61.6844	13.7492		56.6781	5.63967		12.3938	16.7757
				61.7988	13.7977		56.7839	5.93851		12.4058	16.7712
				61.8946	13.6269		56.8974	6.31233		12.4183	16.7025
				61.9856	13.7396		56.997	6.00519		12.4307	16.8263
				62.0957	13.8119		57.11	5.27657		12.4437	16.8403
				62.2024	13.8615		57.2149	5.13476		12.4569	16.8243
				62.3132	13.6923		57.3179	5.7639		12.47	16.6556
				62.4234	13.811		57.4149	5.99183		12.4828	16.5432
				62.5337	14.1277		57.5237	6.51015		12.4952	16.512
				62.625	13.7928		57.632	6.06418		12.5074	16.2936
				62.7233	13.63		57.7333	6.13798		12.52	16.201
				62.8287	13.3421		57.8213	6.06968		12.5325	16.2489
				62.918	13.6475		57.9119	6.05184		12.5454	16.5098
				63.0099	13.7495		58.0072	5.79703		12.5592	16.6059
				63.1124	13.981		58.0954	5.6006		12.5732	16.4762
				63.2233	13.9966		58.1996	6.37179		12.5872	16.2699
				63.328	13.9929		58.2937	6.51689		12.6015	16.3987
				63.4386	14.0708		58.4065	6.41437		12.6162	16.5072
				63.5282	14.0985		58.4919	5.77033		12.6306	16.3835
				63.6259	13.9908		58.5809	5.95059		12.6458	16.471
				63.7217	14.0811		58.6932	6.33894		12.6608	16.5663
				63.8356	14.1383		58.7832	6.36414		12.6759	16.5704
				63.9398	14.2023		58.8761	6.07006		12.6908	16.7021
				64.0518	13.9888		58.9615	6.13056		12.7054	16.6431
				64.1405	14.2465		59.0639	6.26632		12.7196	16.6462
				64.2496	14.2743		59.1685	6.0819		12.733	16.808
				64.3604	14.7911		59.2788	6.17483		12.7454	16.8955
				64.4478	14.3924		59.3835	6.37198		12.758	16.8058
				64.5568	14.0922		59.4964	6.52697		12.7707	16.9317
				64.6543	13.9751		59.5858	6.39593		12.7829	16.8922
				64.7596	13.5805		59.6789	6.13488		12.7947	16.9666
				64.8656	13.6635		59.7679	5.87747		12.8068	16.9448
				64.9776	13.4994		59.8739	5.82534		12.8194	16.6462
				65.0874	14.2625		59.978	6.13421		12.8324	16.4774
				65.2036	14.501		60.0863	6.2773		12.8457	16.446
				65.2947	14.5012		60.1927	6.49388		12.8586	16.5592
				65.3907	13.9342		60.3056	6.40474		12.8717	16.5623
				65.4827	13.8225		60.3952	5.97825		12.8851	16.5753
				65.5959	13.9466		60.4869	5.70802		12.898	16.4413
				65.7035	14.5121		60.5758	5.60737		12.9103	16.6197
				65.8136	14.565		60.683	6.1399		12.9226	16.8551
				65.9259	14.6386		60.7885	6.35783		12.9352	16.9772
				66.0418	14.2088		60.8973	6.62271		12.948	17.2172
				66.1332	14.2754		61.0057	6.55995		12.9616	17.4454
				66.2266	13.9207		61.1159	6.57479		12.9758	17.6452
				66.3199	13.5265		61.2072	6.50671		12.9902	17.5181
				66.4342	13.7216		61.3022	5.93135		13.0044	17.3434
				66.5429	14.3171		61.3914	6.48072		13.0189	17.2985
				66.6533	14.6036		61.4958	6.08729		13.0334	17.5971
				66.7684	14.3072		61.6003	6.35107		13.0485	17.4698
				66.8793	13.9802		61.709	5.91847		13.0633	17.22
				66.9738	13.8442		61.7931	5.85887		13.0779	17.2063
				67.0718	13.7714		61.9003	5.67664		13.0917	17.2217
				67.1651	14.0999		61.9883	6.01757		13.106	17.0041
				67.2522	14.3848		62.0816	6.31193		13.12	16.7237
				67.3593	14.6435		62.1765	6.20751		13.1333	16.7705
				67.4688	14.3781		62.2639	5.96552		13.1463	16.7812
				67.5821	14.3962		62.3666	5.63869		13.1589	16.9096
				67.6929	14.4901		62.4682	6.08666		13.1712	16.891
				67.7809	14.5031		62.5796	6.1694		13.1836	17.1357
				67.8765	14.484		62.685	6.39036		13.1962	17.2032
				67.9763	14.7432		62.7948	6.63594		13.2088	17.0507
				68.0689	14.5729		62.8867	6.89955		13.2214	16.8783
				68.1788	14.4393		62.9836	6.50445		13.2345	17.1665
				68.282	14.5891		63.0766	5.76375		13.2475	17.395
				68.3967	14.7727		63.1833	6.20132		13.2604	17.3012
				68.5095	14.9497		63.2823	6.47754		13.2735	17.4609
				68.6184	15.2474		63.3892	6.64708		13.2867	17.6277
				68.7114	15.0292		63.4978	6.42647		13.2994	17.7186
				68.8112	14.8911		63.6058	6.74882		13.3116	17.6428
				68.9074	14.3675		63.6925	6.69768		13.3237	17.7226
				68.9955	14.5107		63.7844	6.76194		13.3363	17.9907
				69.0986	14.7204		63.8807	6.69678		13.3497	18.1327
				69.2109	15.0327		63.9687	6.43038		13.3638	17.9379
				69.3254	15.3441		64.0695	6.86185		13.3782	17.9059
				69.4329	15.2197		64.1725	7.10281		13.3928	18.0855
				69.5503	15.1921		64.2817	6.93133		13.4078	18.2056
				69.642	14.7614		64.3865	6.40289		13.4228	18.1267
				69.7422	14.7777		64.4991	6.22545		13.438	17.9554
				69.8359	14.644		64.5908	6.51648		13.4534	17.7638
				69.9441	15.0136		64.6847	6.84166		13.4684	17.6047
				70.048	15.2853		64.7751	6.77915		13.4828	17.4315
				70.1599	14.9809		64.8819	6.55515		13.497	17.4008
				70.2699	14.6983		64.9855	6.47097		13.511	17.5175
				70.3846	14.6858		65.0938	6.5554		13.5241	17.6595
				70.477	14.8194		65.198	6.79013		13.5372	17.6493
				70.5747	15.1051		65.3091	6.85261		13.5497	17.6808
				70.6697	15.191		65.3982	6.55294		13.5622	17.6531
				70.757	14.9721		65.4921	6.35324		13.5744	17.663
				70.8639	15.0332		65.5809	6.34366		13.5865	17.8135
				70.9737	14.9912		65.6653	6.74699		13.5993	17.915
				71.085	15.4055		65.7696	6.9711		13.6123	18.0046
				71.194	15.3071		65.877	6.7951		13.625	18.103
				71.2856	15.4385		65.9855	7.20971		13.638	18.2115
				71.3789	15.1044		66.0888	7.33802		13.6516	18.2814
				71.4752	14.8257		66.1786	7.27478		13.6651	18.4784
				71.5657	14.8058		66.2723	6.86789		13.6784	18.2729
				71.677	14.7647		66.3659	6.47776		13.6913	18.1785
				71.7855	15.0295		66.4521	6.44195		13.7036	18.2435
				71.8998	15.0395		66.5572	6.56309		13.7157	18.3111
				72.0045	15.2055		66.6633	7.00118		13.728	18.4137
				72.0929	15.3094		66.7732	7.41252		13.7408	18.3124
				72.186	14.7368		66.8767	7.27273		13.7541	18.3851
				72.2843	14.7098		66.9614	6.91569		13.7682	18.4436
				72.3783	14.7101		67.0508	6.83568		13.7827	18.2434
				72.4653	14.7086		67.1479	6.74139		13.7971	17.8649
				72.5742	14.9448		67.2397	6.37523		13.8115	17.8037
				72.6838	15.1032		67.3483	6.91551		13.8265	17.8729
				72.7713	15.2838		67.4497	7.09171		13.8418	17.6776
				72.877	15.1786		67.5597	6.92718		13.8573	17.6281
				72.9647	15.2007		67.6677	7.09067		13.8724	17.6369
				73.059	14.9149		67.7726	7.22654		13.8868	17.9353
				73.1592	15.175		67.8609	6.96153		13.9009	18.0222
				73.2532	15.2897		67.9519	6.73174		13.9146	17.9291
				73.3642	15.4496		68.0472	7.07724		13.928	17.8855
				73.4715	15.439		68.1335	7.07121		13.9408	18.109
				73.5856	15.1582		68.2397	7.13675		13.953	18.462
				73.6963	15.0618		68.3416	7.02368		13.9651	18.5363
				73.8065	15.2214		68.4265	6.78919		13.9775	18.6564
				73.898	15.5971		68.5321	6.86265		13.99	18.7105
				73.9931	15.1343		68.6401	7.53872		14.0023	18.7387
				74.0901	15.1572		68.7275	7.55775		14.0151	18.6155
				74.1789	15.2652		68.8211	7.34771		14.0283	18.4745
				74.2866	15.3414		68.9146	6.93289		14.0413	18.4774
				74.3959	15.4513		68.9992	6.13636		14.0545	18.629
				74.4829	15.2957		69.103	6.08577		14.0677	18.6365
				74.5924	15.6436		69.207	6.7102		14.0811	18.4443
				74.7043	15.8724		69.3182	7.11784		14.0944	18.3618
				74.7949	15.6363		69.4223	6.81995		14.1076	18.4728
				74.893	15.2917		69.5073	7.28765		14.1207	18.6967
				74.9891	15.1617		69.5962	6.64253		14.1329	18.6276
				75.0761	15.1362		69.6905	6.40481		14.1453	18.6032
				75.1825	15.2187		69.7793	6.89064		14.1583	18.54
				75.2918	15.2851		69.886	7.11121		14.1716	18.5089
				75.4065	15.5308		69.9911	7.31635		14.1858	18.5614
				75.5146	15.5701		70.0992	6.9858		14.2	18.5384
				75.6022	15.4476		70.2062	7.30884		14.2142	18.4691
				75.6967	15.2245		70.3142	7.31675		14.2288	18.5155
				75.7928	14.9302		70.4044	6.91558		14.244	18.4712
				75.8835	15.1686		70.4971	6.73972		14.2594	18.3189
				75.9954	15.3917		70.5868	6.51178		14.2745	18.333
				76.1028	15.8508		70.6955	6.74758		14.2891	18.4222
				76.2155	15.3908		70.8007	7.33635		14.3036	18.4888
				76.3256	15.1434		70.908	6.6724		14.3176	18.4517
				76.4408	15.067		71.0177	6.77241		14.3309	18.3797
				76.5337	15.606		71.1253	6.77576		14.3435	18.3858
				76.6276	15.584		71.2164	7.24831		14.3556	18.4974
				76.7211	15.6726		71.3114	6.66374		14.3678	18.6438
				76.8331	15.6004		71.4048	6.77486		14.3798	18.8344
				76.942	15.9742		71.5145	6.71069		14.3921	18.8502
				77.0539	15.6054		71.6168	6.7574		14.405	18.8296
				77.1673	15.6343		71.722	6.81854		14.4177	18.759
				77.2793	16.0227		71.8323	6.49134		14.4303	18.7098
				77.3724	15.9654		71.9403	6.86182		14.4433	18.7362
				77.4724	16.1856		72.028	7.20991		14.4567	18.7151
				77.5683	16.0223		72.1213	6.92547		14.47	18.7573
				77.6793	15.8246		72.2175	6.08606		14.4834	18.8752
				77.7861	15.4381		72.3044	5.71835		14.4966	18.8555
				77.8966	15.3377		72.4071	6.1298		14.5091	18.7928
				77.9841	15.4714		72.5093	7.00472		14.5212	18.6893
				78.0946	16.1744		72.6174	7.0461		14.5336	18.7094
				78.1832	16.8115		72.725	7.1746		14.5466	18.6883
				78.2794	16.646		72.8363	6.57648		14.5598	18.6938
				78.3791	15.7645		72.9267	6.34083		14.5731	18.8743
				78.4713	15.7184		73.0245	6.03143		14.5874	19.0274
				78.58	15.7812		73.1165	6.14928		14.6017	19.1234
				78.6846	16.2684		73.222	6.79911		14.6156	19.0404
				78.7953	16.3848		73.3221	6.60556		14.6301	18.9295
				78.9077	16.3667		73.4296	7.05215		14.6451	18.8326
				79.0198	16.4151		73.5379	6.79855		14.6603	18.8693
				79.1128	16.0014		73.645	6.47574		14.6748	18.9013
				79.2124	16.0437		73.7324	6.47405		14.6892	18.9773
				79.3112	15.851		73.8261	7.10459		14.7041	18.9608
				79.3991	15.734		73.9229	6.24433		14.7188	18.8441
				79.502	16.1813		74.0082	6.37469		14.7326	18.6725
				79.6107	15.9524		74.1095	6.76641		14.7456	18.4105
				79.7236	16.1636		74.2121	6.70641		14.7584	18.3916
				79.8336	15.8687		74.3204	6.5891		14.7707	18.4557
				79.9495	16.397		74.4266	7.10627		14.7827	18.2765
				80.0453	16.1891		74.54	7.01399		14.7949	18.3507
				80.1444	16.1289		74.6322	6.57087		14.8073	18.5878
				80.2365	16.4529		74.7262	7.0039		14.8198	18.6885
				80.3449	16.2729		74.8164	6.65182		14.8324	18.8029
				80.4497	16.5349		74.9224	6.5183		14.845	18.6744
				80.5602	16.4971		75.0254	6.68523		14.8578	18.8136
				80.6704	16.5377		75.1348	7.03411		14.8714	19.0233
				80.7858	16.3582		75.2371	6.99204		14.8851	18.9918
				80.8773	16.3471		75.3495	6.46368		14.8988	19.0593
				80.9781	16.326		75.4408	6.08743		14.9117	19.3645
				81.0721	16.4547		75.5334	5.80407		14.9238	19.6341
				81.1853	16.402		75.6226	6.09853		14.9359	19.496
				81.2916	16.5171		75.7292	6.3458		14.9485	19.2622
				81.4027	15.8504		75.8177	6.99126		14.9614	19.2904
				81.5117	16.4068		75.9229	6.71613		14.9747	19.4928
				81.625	16.6552		76.0352	7.1932		14.9889	19.5016
				81.7182	16.7082		76.1417	6.57437		15.0032	19.5023
				81.8137	16.2287		76.228	6.9168		15.0172	19.5373
				81.9062	15.8292		76.3208	6.38192		15.0315	19.4541
				81.995	16.1129		76.411	6.30981		15.0464	19.3828
				82.1033	16.4455		76.5205	7.25459		15.0617	19.2155
				82.2151	16.7467		76.6242	7.45053		15.0766	19.1093
				82.3268	16.0304		76.73	7.69941		15.091	19.1839
				82.4339	16.0214		76.8396	6.70007		15.1053	19.1775
				82.5246	16.2475		76.9429	6.52772		15.1195	19.2164
				82.6216	16.085		77.0313	6.50175		15.1333	19.2443
				82.7204	15.8572		77.121	7.01559		15.1467	19.3178
				82.8114	15.9852		77.2275	7.37388		15.1597	19.3734
				82.9208	16.6995		77.322	7.22451		15.1723	19.5651
				83.0284	16.851		77.4151	6.96528		15.1844	19.6358
				83.139	16.4971		77.5023	7.09421		15.1965	19.42
				83.2507	15.8923		77.6083	6.83528		15.2089	19.5839
				83.3658	16.4422		77.7128	7.22418		15.2213	19.8393
				83.4594	16.2465		77.8182	7.54517		15.2341	19.9486
				83.5595	16.4353		77.9051	7.58134		15.247	19.8505
				83.653	16.385		77.9959	7.61912		15.2598	19.6468
				83.7648	16.5095		78.0892	6.98561		15.273	19.6779
				83.8716	16.3022		78.175	7.07421		15.2866	19.5954
				83.9861	16.1742		78.277	6.93017		15.3001	19.4296
				84.0995	16.4213		78.3808	7.13037		15.3131	19.2828
				84.2092	16.7314		78.4649	7.17371		15.3254	19.481
				84.2992	17.1617		78.5679	7.72994		15.3381	19.6476
				84.3953	16.5235		78.6702	7.57463		15.3509	19.5314
				84.4926	16.1644		78.7629	7.50256		15.3645	19.4334
				84.5811	15.804		78.8671	6.98891		15.3784	19.3776
				84.6864	16.2366		78.9636	6.85033		15.3921	19.4796
				84.7938	16.6733		79.0687	7.49828		15.4061	19.442
				84.8822	16.7		79.1694	7.83876		15.4203	19.5262
				84.9936	16.5122		79.2746	7.68297		15.4346	19.5525
				85.1013	16.2996		79.3837	7.24468		15.4494	19.6247
				85.2174	16.564		79.4914	6.98734		15.4643	19.7774
				85.3237	16.5341		79.5794	7.21136		15.4789	19.7139
				85.4282	16.6706		79.668	7.43919		15.4933	19.6688
				85.5352	16.9534		79.7593	7.60955		15.5072	19.6004
				85.6389	17.1838		79.8471	7.06149		15.521	19.8323
				85.7493	17.0903		79.9523	7.76413		15.5346	20.045
				85.8611	16.6401		80.0557	7.59822		15.5475	20.0444
				85.9762	16.7433		80.1655	7.56354		15.5602	20.0348
				86.0658	16.6362		80.2699	7.12601		15.5724	20.2259
				86.1616	17.0655		80.3579	7.41238		15.5846	20.4296
				86.2559	17.1677		80.447	7.07477		15.597	20.3378
				86.3688	16.717		80.5388	7.14111		15.6096	20.2837
				86.4766	16.4051		80.6274	7.34155		15.6222	20.3654
				86.5857	15.8758		80.7348	7.13012		15.6353	20.7503
				86.6735	16.5271		80.8415	7.06526		15.6481	20.6325
				86.7828	16.6291		80.9484	7.11561		15.6605	20.2809
				86.8734	17.1157		81.0566	7.46872		15.6734	20.3786
				86.9669	16.6978		81.1682	7.48309		15.6864	20.5702
				87.062	16.4485		81.2594	7.49632		15.7	20.4824
				87.1514	16.5854		81.3542	7.26564		15.7136	20.2944
				87.2631	16.8192		81.445	7.06408		15.7262	20.2541
				87.3695	16.5486		81.5533	7.01865		15.7389	20.2194
				87.4836	16.2867		81.6556	7.35991		15.7522	20.2523
				87.5953	16.7568		81.7618	7.44431		15.7658	20.0297
				87.7129	16.8818		81.8464	7.50195		15.7804	20.0235
				87.8101	16.5503		81.9516	7.76651		15.7951	20.2967
				87.9069	16.0982		82.038	7.74723		15.8096	20.2848
				87.9984	15.8208		82.1309	7.55109		15.8245	20.1813
				88.1068	16.3482		82.228	7.54622		15.8395	20.1257
				88.2141	16.8799		82.316	7.37243		15.8549	20.3282
				88.3264	16.8592		82.4211	7.8043		15.8697	20.4689
				88.4371	16.6133		82.5212	7.94413		15.8843	20.4911
				88.5528	16.9871		82.6314	7.56566		15.8987	20.5505
				88.6483	16.5613		82.7383	7.05406		15.9126	20.4152
				88.7469	16.5938		82.8486	7.19897		15.9259	20.3366
				88.8421	16.7858		82.9376	7.41774		15.9391	20.4128
				88.9529	17.1507		83.0326	7.71311		15.9518	20.4557
				89.0579	17.3347		83.1273	7.66863		15.9648	20.473
				89.1681	16.9208		83.2371	7.45923		15.9773	20.6228
				89.28	16.6932		83.3364	7.10864		15.9893	20.4892
				89.3895	16.1826		83.4418	7.02383		16.0012	20.4023
				89.4843	16.1837		83.5502	7.06981		16.0133	20.4304
				89.5811	16.5192		83.6583	7.83787		16.0254	20.2103
				89.6802	16.6576		83.7437	7.7163		16.0382	20.4117
				89.7686	16.6683		83.8354	7.49731		16.0513	20.5437
				89.8763	16.5087		83.9327	7.69841		16.0646	20.4531
				89.984	16.4517		84.0214	7.47037		16.0784	20.4757
				90.0972	16.7361		84.1248	7.37191		16.092	20.5748
				90.2072	16.7321		84.2261	7.32227		16.1054	20.6251
				90.3217	17.063		84.3346	7.72386		16.1181	20.5931
				90.4146	16.7755		84.4386	7.88537		16.1302	20.5322
				90.5134	16.5296		84.5468	7.84694		16.1429	20.5248
				90.6094	16.5389		84.6342	7.68816		16.1562	20.8124
				90.7183	16.2819		84.7306	7.01241		16.1696	20.9698
				90.8229	16.6423		84.823	7.08854		16.1837	21.049
				90.933	16.9034		84.9097	7.32209		16.1982	20.9903
				91.0421	16.9693		85.0126	7.58509		16.2129	20.7223
				91.1569	16.9958		85.1192	7.15511		16.228	20.5983
				91.2452	16.7107		85.2241	6.94429		16.2432	20.3892
				91.339	16.8639		85.3317	7.01198		16.2587	20.3824
				91.4382	16.9112		85.4207	7.72012		16.2738	20.4129
				91.5291	17.0564		85.5134	7.7198		16.2884	20.4282
				91.6363	17.4235		85.6069	7.55285		16.3026	20.2366
				91.7465	17.1413		85.6926	7.86934		16.3165	20.1203
				91.8345	17.1315		85.7964	7.99114		16.3298	20.2
				91.9397	16.9296		85.9018	7.88211		16.3423	20.4166
				92.0566	17.1316		86.0091	7.76583		16.3546	20.527
				92.1504	16.9166		86.112	8.23744		16.3669	20.3618
				92.2473	16.6512		86.2004	7.97478		16.3793	20.4897
				92.3384	17.1113		86.2946	8.01992		16.3917	20.628
				92.45	17.2251		86.3896	7.75056		16.4038	20.7401
				92.559	16.9837		86.4783	7.68987		16.4164	20.6929
				92.6707	16.53		86.5858	7.89511		16.4293	20.7218
				92.7769	16.6194		86.6898	7.54213		16.4822	20.7635
				92.8642	16.9817		86.7981	7.63194		16.533	20.8936
				92.9604	17.1804		86.9032	7.89526		16.5854	21.308
				93.0588	16.9132		87.012	8.06332		16.6293	21.1181
				93.1522	16.9853		87.103	7.77014		16.6768	21.1177
				93.2642	16.9329		87.1971	7.60842		16.7208	20.7078
				93.3759	16.904		87.2899	7.08897		16.7712	21.2055
				93.4869	16.3933		87.3745	6.74703		16.8192	21.6257
				93.5984	16.3936		87.4778	6.90782		16.8709	21.5338
				93.7082	16.9992		87.5841	7.2902		16.9228	21.4155
				93.8004	17.2407		87.6937	7.60321		16.9751	21.0828
				93.8958	17.5157		87.7978	7.81137		17.0158	20.9552
				93.9926	16.8418		87.8828	8.08876		17.0609	21.0786
				94.0824	16.3802		87.9735	7.54459		17.107	21.4362
				94.1908	16.5643		88.0678	7.55205		17.1489	21.5664
				94.302	16.7822		88.1573	7.38685		17.1977	21.611
				94.4154	17.3608		88.266	7.13207		17.2464	21.1554
				94.523	17.3123		88.3691	7.57965		17.2987	21.0684
				94.6383	17.2328		88.4769	7.65637		17.3485	21.3012
				94.733	16.5007		88.5825	7.06007		17.3889	21.6091
				94.8298	16.555		88.6908	7.07678		17.4313	21.9902
				94.9229	16.6954		88.7796	6.96244		17.4771	22.1748
				95.0348	17.0716		88.8726	7.29078		17.5216	21.9312
				95.1423	17.4588		88.965	7.43848		17.574	21.9668
				95.2555	17.2338		89.0503	7.40644		17.6227	22.0064
				95.3634	17.197		89.1551	7.30687		17.6742	22.135
				95.4756	17.1752		89.2605	7.03543		17.7258	22.4206
				95.5667	17.1552		89.3711	7.36427		17.7778	22.6707
				95.6633	17.0902		89.4733	7.55927		17.8206	22.7329
				95.7599	17.3013		89.5593	7.50957		17.8648	22.2788
				95.8476	17.3796		89.6469	7.33054		17.908	22.1614
				95.956	17.3906		89.7419	7.18769		17.9489	22.27
				96.0651	17.1051		89.8324	6.82996		17.9995	22.2894
				96.1799	17.2572		89.9396	7.08661		18.0503	22.3804
				96.287	16.9381		90.0426	7.08265		18.1022	22.6309
				96.3745	17.461		90.1517	7.56414		18.1521	22.9082
				96.4667	17.412		90.2596	7.80299		18.1949	22.9206
				96.5643	17.0136		90.3678	8.16647		18.239	22.4742
				96.6569	16.9001		90.4568	7.98588		18.2843	22.3472
				96.7692	16.7245		90.5495	7.41279		18.3261	22.449
				96.8761	17.0112		90.6409	7.32571		18.3773	22.8708
				96.9884	17.0046		90.7508	7.4563		18.4276	22.9657
				97.1013	17.3375		90.8531	7.65465		18.4808	22.8778
				97.2132	17.2519		90.9598	7.84054		18.5311	22.7772
				97.305	17.2423		91.0447	7.99327		18.5839	22.4599
				97.4013	17.4135		91.1512	8.2679		18.627	22.2394
				97.4948	16.8574		91.2392	7.92512		18.6734	22.1074
				97.5823	16.9332		91.33	7.15343		18.7166	22.2526
				97.688	17.5942		91.4257	7.08859		18.768	22.7802
				97.7982	18.0335		91.5132	7.39		18.8173	23.0179
				97.8857	17.7862		91.6178	8.42496		18.8706	22.68
				97.995	17.6425		91.719	8.48374		18.9232	22.5313
				98.0822	17.585		91.8272	7.71119		18.9734	22.9688
				98.1784	17.6889		91.9366	7.33625		19.0152	23.2803
				98.2768	17.4999		92.0487	7.25281		19.0603	23.3518
				98.3708	16.9841		92.1407	7.66972		19.1054	23.3812
				98.4817	17.2854		92.2346	7.85773		19.1466	23.2109
				98.5863	17.378		92.3262	7.35849		19.1956	23.0897
				98.6948	17.3816		92.4346	7.33228		19.2458	23.1867
				98.7832	17.2299		92.5352	7.18919		19.2862	22.9562
				98.895	17.0219		92.643	7.71313		19.3386	23.3555
				98.9859	17.3309		92.7508	7.58533		19.3904	23.8151
				99.081	17.3128		92.8602	8.09142		19.432	23.7894
				99.1796	17.3649		92.9475	7.8291		19.4764	23.5854
				99.2709	17.022		93.0434	7.79045		19.5208	23.3895
				99.3783	16.8787		93.1382	7.87249		19.5612	23.1166
				99.4855	17.0696		93.2244	7.11066		19.61	23.5065
				99.5983	17.5171		93.3278	7.11995		19.6611	24.1157
				99.709	17.8129		93.4291	7.59654		19.7119	24.5297
				99.8249	17.9979		93.5363	7.87051		19.7644	24.1696
				99.9185	17.4995		93.6426	8.09395		19.8056	24.177
				100.017	17.0189		93.7268	8.0388		19.8476	23.7879
				100.112	16.7108		93.8165	7.32437		19.8923	24.0493
				100.2	16.3149		93.9112	7.29263		19.9355	24.2091
				100.303	16.6263		94.0035	7.39446		19.9873	24.1115
				100.41	16.942		94.1126	7.94885		20.0368	24.3384
				100.524	17.2397		94.2157	8.11		20.0889	24.2616
				100.634	17.3049		94.3184	7.8564		20.1405	24.7141
				100.723	17.5555		94.4251	7.3747		20.1935	24.5465
				100.817	17.1494		94.5342	7.35273		20.2368	24.2603
				100.916	16.9678		94.6229	7.63305		20.281	24.0818
				101.009	17.1946		94.7153	7.60269		20.3235	24.1452
				101.119	17.4091		94.8067	7.35019		20.376	24.9521
				101.224	17.5758		94.8957	7.69778		20.4252	24.8808
				101.334	17.6702		94.9996	7.61128		20.4771	24.6432
				101.443	17.4928		95.1045	7.59502		20.5177	24.4928
				101.558	17.119		95.2134	7.75855		20.5683	24.5701
				101.65	17.497		95.3166	7.64044		20.61	24.7706
				101.745	17.4683		95.4013	7.81342		20.6552	25.0119
				101.84	17.5456		95.4911	7.41278		20.7004	24.8791
				101.934	17.6031		95.5846	7.45427		20.7419	24.7017
				102.039	17.3081		95.6735	7.73596		20.7911	24.856
				102.148	17.3211		95.7832	7.71567		20.8411	24.7045
				102.259	17.0818		95.8871	7.67631		20.8931	24.8083
				102.368	17.193		95.9959	7.55134		20.9451	24.5595
				102.459	17.2421		96.1024	7.77341		20.9992	24.9372
				102.553	17.8589		96.2113	7.8045		21.0434	24.6987
				102.649	17.4212		96.3011	7.88302		21.0903	24.374
				102.74	17.1394		96.3952	7.76633		21.1329	23.9568
				102.849	17.0402		96.488	7.3366		21.1833	24.327
				102.958	17.1643		96.5973	7.50571		21.232	25.0415
				103.071	17.3107		96.7019	7.67553		21.2848	25.1438
				103.169	17.9643		96.8097	7.95997		21.3366	25.3799
				103.288	18.3777		96.9192	8.12979		21.3886	25.1657
				103.398	17.8419		97.024	8.00985		21.4312	24.8396
				103.497	17.2649		97.113	7.76792		21.4773	24.8777
				103.586	17.2582		97.2066	7.02151		21.522	24.9141
				103.693	17.4639		97.2994	7.24763		21.5742	25.1687
				103.804	17.8381		97.3839	7.7921		21.6228	25.4524
				103.916	18.0423		97.4853	8.09655		21.6741	25.7214
				104.025	17.8292		97.5975	7.95306		21.7252	25.7414
				104.139	17.9355		97.7089	7.6636		21.7766	25.4351
				104.231	17.6989		97.8138	7.78092		21.8177	25.302
				104.33	17.8116		97.9265	7.6292		21.8615	25.3644
				104.426	17.3624		98.0139	7.90567		21.908	25.7241
				104.538	17.4769		98.109	7.85326		21.9507	25.6601
				104.63	17.9872		98.1983	7.80161		22.0008	25.4116
				104.743	18.0292		98.3061	8.00295		22.0489	25.425
				104.848	18.1381		98.407	7.84734		22.1014	25.343
				104.937	17.4957		98.5161	7.81759		22.1513	25.5675
				105.047	17.4118		98.6246	8.3312		22.2051	25.812
				105.138	17.7754		98.7342	8.01954		22.2474	25.8842
				105.233	18.0187		98.8435	8.26663		22.2934	25.6532
				105.326	17.8722		98.9573	7.62814		22.338	25.4632
				105.435	17.9724		99.0673	7.65774		22.3895	25.6476
				105.541	18.0299		99.1541	7.83588		22.4388	25.8472
				105.654	17.9266		99.2521	8.16757		22.4909	25.6613
				105.768	18.283		99.3568	8.12385		22.5413	26.2492
				105.879	18.6181		99.4644	8.06638		22.5936	26.6161
				105.97	18.859		99.5718	8.00774		22.636	26.2284
				106.058	18.5375		99.6588	7.94322		22.6805	25.9076
				106.169	18.6198		99.7517	7.78142		22.7236	25.5445
				106.267	17.9241		99.8417	7.3144		22.7641	25.0857
				106.37	17.5224		99.9265	7.47299		22.8152	25.2999
				106.475	17.6742		100.032	8.19975		22.8661	26.0234
				106.585	18.5578		100.135	8.41456		22.9185	26.5103
				106.692	18.6511		100.244	8.44238		22.9683	26.548
				106.809	18.5864		100.35	7.95223		23.0118	26.6705
				106.9	18.5884		100.439	7.11297		23.0558	26.0361
				106.995	18.1052		100.53	7.11031		23.101	26.1611
				107.087	18.155		100.623	7.42951		23.1428	26.6134
				107.197	18.3199		100.708	7.25585		23.193	26.526
				107.305	18.6266		100.817	7.67119		23.2434	26.77
				107.418	18.5529		100.92	7.80828		23.296	26.7299
				107.528	18.5928		101.03	7.97944		23.3461	26.4391
				107.616	18.1922		101.137	7.98178		23.4	26.424
				107.708	18.1286		101.249	8.31829		23.4441	26.3011
				107.804	17.9981		101.34	8.04867		23.4899	26.9024
				107.895	18.1362		101.434	7.75914		23.5326	26.5146
				108.008	18.1451		101.524	7.79261		23.5844	26.8404
				108.117	18.5933		101.631	7.42973		23.634	26.874
				108.228	18.7153		101.735	7.48665		23.6867	26.8658
				108.316	18.326		101.841	7.43087		23.7384	26.8015
				108.423	18.2052		101.925	7.86654		23.7899	27.0101
				108.516	17.7923		102.03	7.95553		23.8319	27.2582
				108.612	17.8842		102.119	8.16113		23.8771	26.9813
				108.708	17.6337		102.213	7.36574		23.9228	27.1458
				108.799	17.5124		102.308	7.55628		23.9752	26.834
				108.905	17.6656		102.395	7.49596		24.0243	27.0962
				109.016	17.8692		102.498	7.59183		24.0749	26.9348
				109.126	17.9925		102.601	7.87192		24.1153	26.9181
				109.239	18.4786		102.712	7.90218		24.1657	27.0165
				109.355	18.7786		102.818	7.79648		24.2061	27.4685
				109.453	18.5946		102.929	7.63831		24.2484	27.5758
				109.552	18.1468		103.019	7.62852		24.2929	27.308
				109.643	18.0142		103.115	6.98615		24.3367	27.3296
				109.753	18		103.207	6.8731		24.3886	26.9309
				109.858	18.1971		103.314	7.68636		24.4383	27.5342
				109.971	18.5932		103.415	8.0757		24.4898	27.7505
				110.084	18.6416		103.521	8.01846		24.53	27.8925
				110.196	18.7424		103.628	7.36778		24.5802	27.7594
				110.287	18.3352		103.738	7.50877		24.6216	27.4678
				110.386	17.9095		103.826	7.56019		24.6648	27.5261
				110.483	18.0519		103.918	7.97866		24.7095	27.431
				110.593	18.285		104.012	8.05091		24.7516	27.3489
				110.699	18.7728		104.099	7.34615		24.8029	27.8946
				110.813	18.7146		104.203	7.13987		24.8532	27.8215
				110.924	18.6004		104.307	7.38001		24.9054	27.9486
				111.035	18.2689		104.413	7.61768		24.9568	27.6812
				111.123	18.6598		104.52	7.90549		25.0098	27.4372
				111.217	18.2803		104.633	7.98974		25.0519	27.4006
				111.318	18.2336		104.724	7.85691		25.0968	27.4255
				111.413	18.6891		104.818	7.63481		25.1392	27.7773
				111.517	19.0487		104.909	7.57288		25.1903	27.8355
				111.622	19.3607		105.014	7.44627		25.2407	27.7235
				111.737	18.8547		105.117	7.32292		25.2936	27.4282
				111.845	18.829		105.225	7.72856		25.3454	27.1903
				111.96	18.6009		105.329	8.11233		25.3983	27.6292
				112.052	19.0312		105.442	8.31544		25.4418	28.168
				112.151	18.9229		105.532	7.87208		25.4872	27.9773
				112.246	18.6417		105.623	7.50654		25.5298	28.0585
				112.359	18.6455		105.712	7.47546		25.5818	27.7972
				112.464	18.6802		105.823	7.6573		25.6315	28.177
				112.576	18.5909		105.926	7.83243		25.6846	27.9481
				112.684	19.1541		106.035	7.72247		25.7358	28.3834
				112.798	19.3913		106.141	7.91396		25.7875	28.3762
				112.89	18.7391		106.252	8.07896		25.8304	28.266
				112.985	18.1758		106.343	7.95237		25.8767	28.2227
				113.079	18.4368		106.438	7.71822		25.9218	27.9328
				113.166	18.2958		106.528	7.89675		25.9622	27.6049
				113.276	18.1967		106.636	7.85882		26.0109	28.0061
				113.385	18.4617		106.742	8.07625		26.0605	28.0747
				113.5	18.7115		106.849	8.01667		26.1011	28.5948
				113.608	19.3562		106.958	8.09987		26.1524	28.6914
				113.697	19.3943		107.064	7.79226		26.2044	28.5632
				113.796	18.7925		107.154	7.81409		26.2464	28.0755
				113.894	18.6347		107.248	7.92138		26.2931	27.7838
				113.984	18.8354		107.34	7.89026		26.3372	28.1352
				114.094	19.351		107.425	7.8682		26.3898	28.6448
				114.203	19.4998		107.527	7.96596		26.4376	28.8011
				114.315	19.3142		107.636	7.70274		26.4886	28.4876
				114.426	18.8742		107.747	7.66956		26.5289	28.165
				114.54	18.9159		107.85	7.99229		26.5797	27.9816
				114.634	19.2637		107.963	8.24381		26.6206	28.2558
				114.732	19.5902		108.053	7.8634		26.6634	27.9134
				114.825	19.2685		108.151	7.55528		26.7091	28.1957
				114.937	19.3158		108.24	7.68753		26.7531	28.5078
				115.042	18.8475		108.345	7.60958		26.8044	28.8061
				115.156	18.8817		108.448	7.72341		26.852	28.901
				115.245	19.1455		108.558	7.59119		26.9032	28.873
				115.354	19.6438		108.663	7.70523		26.955	28.6015
				115.471	19.8144		108.775	7.86129		27.0081	28.5469
				115.569	19.1966		108.861	7.94397		27.0502	28.9906
				115.668	19.4204		108.952	7.45349		27.0952	29.0645
				115.756	19.0613		109.044	7.58784		27.1393	28.6287
				115.862	19.2328		109.128	7.77526		27.1805	28.5429
				115.97	19.2468		109.233	8.10293		27.2289	28.4715
				116.058	19.1781		109.338	8.23332		27.2795	28.644
				116.166	19.5298		109.45	7.66708		27.3313	28.8973
				116.279	19.5046		109.556	7.23985		27.3827	29.0671
				116.371	19.2362		109.642	7.22645		27.4247	29.2568
				116.466	18.702		109.73	8.10073		27.4682	28.9586
				116.559	18.7674		109.824	8.19259		27.512	28.6786
				116.647	18.7283		109.911	7.75761		27.5541	28.6012
				116.756	19.0496		110.018	7.9825		27.6061	28.4789
				116.864	19.0348		110.122	7.93368		27.6565	29.0239
				116.952	19.047		110.231	8.17808		27.7083	28.9469
				117.063	18.6602		110.338	8.20493		27.7581	29.6149
				117.18	19.0127		110.448	8.84799		27.8127	29.0655
				117.272	19.4756		110.539	8.23719		27.8571	29.3694
				117.368	19.428		110.632	8.09541		27.9021	29.7925
				117.459	19.5681		110.72	7.98151		27.9439	28.8174
				117.568	19.4179		110.828	7.56871		27.9956	29.7805
				117.677	19.6354		110.931	7.39466		28.0463	30.2264
				117.791	19.463		111.04	7.50084		28.0981	30.309
				117.901	19.3589		111.125	8.08395		28.15	29.6659
				118.016	19.3899		111.23	8.28841		28.2018	29.9701
				118.108	19.4355		111.319	8.50042		28.2454	30.0222
				118.204	19.4821		111.413	7.71886		28.2913	29.9336
				118.296	19.08		111.507	7.52046		28.335	29.6421
				118.407	18.8996		111.594	7.50105		28.3871	29.4883
				118.514	18.6135		111.697	7.62714		28.4363	29.7896
				118.628	18.6286		111.799	8.12084		28.4891	29.8367
				118.716	19.0775		111.909	8.06066		28.5416	29.7151
				118.824	19.7866		112.016	8.2068		28.5921	30.0946
				118.916	19.9237		112.128	7.96745		28.6342	30.3699
				119.014	19.711		112.222	8.09742		28.6776	30.1183
				119.111	19.2014		112.318	7.69108		28.7228	30.2233
				119.2	18.7794		112.408	7.38948		28.7648	30.2505
				119.308	18.9562		112.513	7.8901		28.8146	30.1685
				119.414	18.9762		112.615	7.85721		28.8643	30.1914
				119.528	19.5737		112.721	8.11894		28.9173	30.5241
				119.639	19.5346		112.83	7.68734		28.9688	30.7396
				119.755	19.955		112.939	7.94568		29.0214	30.7194
				119.854	19.2356		113.029	7.72792		29.0635	30.8074
				119.953	19.0472		113.124	7.7102		29.1075	30.2735
				120.045	18.9538		113.217	7.7206		29.1526	30.4087
				120.152	19.2381		113.302	7.48785		29.193	30.5119
				120.258	19.7747		113.404	7.87499		29.2415	30.9307
				120.369	19.874		113.507	7.60172		29.2914	31.6749
				120.482	19.9574		113.616	7.67642		29.332	31.3246
				120.595	19.6573		113.722	7.92631		29.3827	30.9286
				120.688	19.2828		113.836	8.29322		29.4231	30.9147
				120.787	19.3098		113.928	7.6987		29.4652	31.086
				120.883	19.7575		114.025	7.70834		29.51	30.4453
				120.97	19.7282		114.113	7.3366		29.5531	30.1111
				121.075	20.0946		114.215	7.55738		29.6057	31.0343
				121.184	19.8142		114.319	7.74058		29.655	31.445
				121.297	19.4403		114.427	8.09236		29.7068	31.4971
				121.406	19.3681		114.532	8.36055		29.7591	30.9404
				121.493	19.6996		114.644	8.25522		29.8119	30.9064
				121.587	19.5777		114.733	8.274		29.8546	30.7159
				121.688	19.009		114.827	7.74766		29.8978	30.9691
				121.782	19.3292		114.919	7.82352		29.941	31.3079
				121.891	19.4129		115.028	8.17111		29.9941	31.4058
				121.997	19.4627		115.131	8.29111		30.0441	31.4745
				122.107	19.712		115.239	8.15844		30.0957	31.2116
				122.217	19.9079		115.343	8.20426		30.149	31.0621
				122.331	19.9435		115.452	8.31967		30.2007	31.1069
				122.424	19.9641		115.542	8.22034		30.2431	31.7912
				122.52	19.7191		115.635	8.23433		30.2864	31.8468
				122.615	19.3382		115.725	8.2151		30.3328	31.5933
				122.705	19.1853		115.809	8.24546		30.3744	31.6183
				122.812	19.5548		115.915	8.4579		30.4235	31.4968
				122.92	19.8728		116.021	8.20531		30.4733	31.4439
				123.032	19.8131		116.129	7.9094		30.5264	31.6421
				123.14	20.0055		116.233	7.94132		30.5769	31.6639
				123.23	19.931		116.323	7.98335		30.6175	31.5089
				123.323	19.8265		116.416	7.86898		30.6616	31.6268
				123.42	19.5954		116.512	8.07519		30.7078	31.4046
				123.509	19.5617		116.598	7.68161		30.751	31.1635
				123.62	19.8894		116.704	7.37979		30.8025	31.3069
				123.731	19.8588		116.808	7.39977		30.8502	31.3554
				123.844	19.9525		116.917	7.74263		30.9022	31.2553
				123.955	19.9713		117.023	8.01939		30.9547	32.3
				124.07	19.7791		117.135	8.37114		31.0059	33.1256
				124.167	19.4136		117.225	8.34536		31.0482	32.0876
				124.265	19.3206		117.32	7.82555		31.0941	31.866
				124.356	19.7847		117.409	7.7021		31.1407	32.2703
				124.467	20.1518		117.518	7.56031		31.1812	32.0396
				124.576	20.0627		117.621	7.92191		31.2299	32.5974
				124.688	19.5759		117.733	8.12751		31.2793	31.9893
				124.799	19.6786		117.839	8.35945		31.3318	31.9123
				124.912	19.7133		117.947	8.46647		31.3828	31.6564
				125.004	19.5929		118.034	8.09996		31.4365	32.3661
				125.1	19.572		118.127	7.92213		31.4797	32.4329
				125.196	19.2409		118.221	7.68377		31.5258	32.0894
				125.283	19.3016		118.306	7.83617		31.569	32.222
				125.391	19.4558		118.41	7.99079		31.6194	32.2948
				125.502	19.3489		118.516	8.21999		31.6678	32.6596
				125.617	19.6471		118.624	7.93001		31.7201	32.3593
				125.725	19.6324		118.729	7.38232		31.7702	32.603
				125.812	19.6952		118.842	7.50724		31.8231	32.1338
				125.902	19.9418		118.933	7.60449		31.8662	32.4116
				126.003	20.0692		119.028	7.71934		31.9118	32.1937
				126.098	19.8747		119.117	7.61828		31.9563	32.2073
				126.209	19.5998		119.222	7.5967		32.0091	32.0687
				126.316	19.9307		119.326	7.70246		32.0575	31.968
				126.43	19.9846		119.434	7.5885		32.1093	32.0171
				126.538	20.3419		119.54	7.79158		32.1603	32.2096
				126.65	20.0069		119.652	8.35569		32.2117	32.2475
				126.742	19.749		119.74	8.17979		32.2545	32.5361
				126.839	19.5843		119.833	8.14765		32.2989	32.0488
				126.934	19.9368		119.923	8.00744		32.342	31.9882
				127.023	20.062		120.031	7.72425		32.3831	32.3321
				127.13	20.0434		120.135	7.88225		32.4336	32.4652
				127.238	20.1402		120.243	7.89347		32.4848	33.1146
				127.352	19.8272		120.352	8.50673		32.5371	32.9554
				127.461	19.6585		120.461	8.54095		32.5869	32.8963
				127.549	19.8518		120.55	8.34496		32.6286	32.3233
				127.641	20.02		120.64	7.62281		32.6726	32.171
				127.737	20.3531		120.731	7.50615		32.718	32.6228
				127.83	20.0619		120.816	7.59523		32.7608	32.5827
				127.941	19.9267		120.919	7.47963		32.8116	33.2759
				128.049	19.8245		121.025	7.57103		32.8618	33.3327
				128.16	19.4166		121.137	7.72435		32.9143	33.386
				128.248	19.6704		121.243	7.61029		32.9653	33.1155
				128.358	19.477		121.331	7.99761		33.0179	33.2574
				128.448	20.1501		121.42	7.79568		33.0611	32.9064
				128.541	19.9086		121.516	7.36376		33.1075	32.9103
				128.637	19.7866		121.606	7.59536		33.1513	33.181
				128.727	19.8914		121.71	7.89998		33.2029	33.4231
				128.835	19.631		121.814	8.35923		33.2523	33.4446
				128.943	19.9161		121.921	7.84739		33.3056	33.1994
				129.057	19.9777		122.029	7.40249		33.3564	32.9437
				129.167	20.2333		122.14	7.90663		33.4075	32.8975
				129.256	20.3121		122.232	8.06015		33.4499	33.1388
				129.351	19.9115		122.328	8.33827		33.4939	33.1107
				129.45	19.7904		122.418	7.5638		33.5398	33.2835
				129.544	19.8671		122.527	7.39301		33.5814	33.2309
				129.655	20.1012		122.627	7.5118		33.6311	33.0641
				129.761	20.7995		122.734	7.80346		33.6806	33.2929
				129.872	20.5437		122.844	8.31975		33.734	33.1488
				129.985	20.2683		122.952	8.30405		33.7843	33.5943
				130.097	20.2297		123.04	8.03573		33.8375	33.8685
				130.191	20.2637		123.132	7.67922		33.8803	33.4431
				130.288	20.3665		123.229	7.80671		33.9258	33.3107
				130.384	19.9999		123.316	7.34194		33.9689	32.9824
				130.473	19.9863		123.419	7.54191		34.0208	33.1233
				130.58	20.1356		123.521	7.73908		34.0694	33.1955
				130.686	20.1228		123.629	7.91477		34.1212	33.2584
				130.801	19.8745		123.736	7.8923		34.1615	33.3501
				130.91	20.0056		123.849	8.02409		34.2118	33.5938
				131.028	20.5184		123.937	7.77644		34.2531	33.676
				131.123	20.5268		124.033	7.2004		34.2972	33.2607
				131.223	20.5762		124.124	7.51913		34.3416	33.4672
				131.315	20.5991		124.232	7.83882		34.3828	33.9251
				131.424	20.4091		124.332	8.252		34.4336	33.8283
				131.53	20.3283		124.439	7.82641		34.4835	33.7112
				131.641	20.5248		124.544	7.75449		34.5366	33.3638
				131.752	20.534		124.655	7.52786		34.5874	33.1343
				131.865	20.8378		124.743	7.8218		34.6281	33.5207
				131.956	20.6141		124.838	8.0065		34.6707	33.5856
				132.057	20.6055		124.931	8.05624		34.7146	33.4105
				132.152	20.2456		125.039	8.07779		34.7578	33.6639
				132.264	20.5106		125.142	7.90626		34.809	33.6767
				132.371	21.0188		125.251	8.33677		34.8597	33.7887
				132.48	20.917		125.357	8.24417		34.9119	33.3654
				132.59	20.589		125.463	8.1386		34.964	33.3554
				132.702	20.6225		125.553	7.81671		35.0164	33.431
				132.793	20.7341		125.644	7.83194		35.0604	33.6594
				132.89	20.6196		125.737	8.37329		35.1061	33.8881
				132.986	20.9164		125.823	8.11458		35.1496	33.7313
				133.076	21.006		125.927	7.70298		35.2017	33.7393
				133.184	21.0269		126.032	7.51708		35.2507	33.7215
				133.292	20.9662		126.143	7.97891		35.3018	33.5892
				133.406	20.6215		126.245	8.16035		35.3548	33.9206
				133.513	20.7911		126.334	8.48774		35.4058	34.0534
				133.631	20.6591		126.423	7.58735		35.4481	34.2399
				133.725	21.2498		126.519	7.51789		35.4936	33.9391
				133.822	21.0368		126.609	7.27474		35.5388	33.759
				133.913	21.0226		126.716	7.37463		35.5801	34.2053
				134.024	20.8669		126.821	7.80021		35.6273	34.5303
				134.13	21.031		126.928	7.69915		35.6795	34.6106
				134.244	21.0645		127.035	7.5827		35.7329	34.4573
				134.353	20.9013		127.145	7.80664		35.7832	34.5283
				134.47	20.9937		127.235	8.10472		35.8359	34.6806
				134.564	20.7564		127.329	7.86634		35.8799	34.4395
				134.663	20.9741		127.421	7.5792		35.9265	34.3641
				134.755	20.7544		127.505	7.77542		35.9705	34.274
				134.866	20.6517		127.608	8.18985		36.0211	34.4942
				134.975	20.1622		127.716	7.97587		36.0692	34.4985
				135.087	20.0005		127.825	8.12333		36.1208	33.6127
				135.197	20.1623		127.93	8.00092		36.173	33.5932
				135.31	20.7398		128.016	8.13864		36.2257	33.8939
				135.403	21.0418		128.104	7.93222		36.2675	34.7591
				135.503	20.5306		128.199	7.92833		36.3119	34.5681
				135.598	20.1606		128.292	8.24142		36.3567	34.4494
				135.71	20.1255		128.398	8.05062		36.3991	34.6004
				135.818	20.9539		128.5	8.12121		36.4472	34.3264
				135.933	21.0577		128.609	7.98447		36.4966	34.3801
				136.044	21.2002		128.718	8.37448		36.5482	34.472
				136.153	21.0467		128.825	8.25148		36.5988	34.6048
				136.243	20.7149		128.913	8.36843		36.6392	35.1531
				136.337	20.734		129.004	8.13897		36.6826	35.0891
				136.437	20.8687		129.097	7.72902		36.7277	34.809
				136.527	20.5217		129.183	7.3206		36.7714	34.7507
				136.634	20.9775		129.286	7.38352		36.8242	34.6179
				136.743	21.106		129.391	8.18225		36.8731	34.8185
				136.857	21.0117		129.501	8.29236		36.9246	34.9097
				136.967	20.5706		129.608	8.46369		36.9755	35.498
				137.082	20.7984		129.692	8.10688		37.028	35.4698
				137.173	21.1949		129.782	7.89606		37.0712	34.9757
				137.271	21.0706		129.874	7.81548		37.1156	34.8253
				137.365	21.3645		129.962	7.622		37.1582	34.887
				137.476	20.734		130.071	8.18895		37.2115	34.8173
				137.583	20.5867		130.176	8.13344		37.2618	35.0485
				137.693	20.6757		130.283	8.21551		37.3132	35.0423
				137.806	20.8597		130.39	8.21417		37.3649	35.2858
				137.92	21.3842		130.498	8.28695		37.416	34.9764
				138.012	21.0367		130.589	7.82611		37.4599	35.2844
				138.108	21.2841		130.683	7.91095		37.5049	35.1381
				138.2	21.1204		130.773	8.00181		37.5487	34.6816
				138.288	20.6189		130.882	8.42591		37.5894	35.0494
				138.397	20.9442		130.985	8.41374		37.64	35.1972
				138.506	20.8451		131.093	7.96822		37.6913	35.9041
				138.619	20.8302		131.177	8.16388		37.7433	35.53
				138.727	20.8223		131.283	8.11241		37.7927	35.6456
				138.816	20.9953		131.371	8.39854		37.8343	35.4408
				138.911	21.132		131.461	8.17615		37.878	35.5222
				139.008	21.1065		131.557	8.31764		37.9239	35.5553
				139.099	20.7789		131.646	8.55087		37.9667	35.0315
				139.208	20.9495		131.749	8.5614		38.0188	34.9735
				139.316	21.509		131.847	8.58319		38.0683	34.8475
				139.43	21.4956		131.958	8.324		38.1203	34.9539
				139.542	21.4632		132.042	8.22534		38.1729	35.2966
				139.656	21.0901		132.151	8.32858		38.224	35.795
				139.75	20.9522		132.242	8.63738		38.2662	35.6125
				139.851	20.7591		132.335	8.56692		38.3105	35.4218
				139.944	20.9792		132.429	8.02762		38.3555	35.733
				140.054	21.3056		132.519	7.94546		38.3966	35.2558
				140.16	21.32		132.62	7.58831		38.4459	35.3725
				140.271	21.0194		132.721	8.44109		38.4957	35.6074
				140.36	21.0136		132.831	8.75574		38.536	36.1377
				140.47	20.9698		132.936	8.95716		38.588	36.0196
				140.561	21.253		133.02	8.78057		38.6398	36.0704
				140.656	21.1416		133.112	8.48687		38.6819	35.7844
				140.755	21.0612		133.208	8.28334		38.7267	35.3341
				140.846	21.1352		133.299	8.02415		38.771	35.7822
				140.954	21.1805		133.406	8.54782		38.8113	35.5092
				141.059	21.1423		133.508	9.08062		38.8605	35.8932
				141.172	21.3195		133.614	8.90629		38.9108	35.9636
				141.282	21.2501		133.723	8.87517		38.9511	36.1853
				141.397	21.5765		133.831	8.44077		39.0015	35.8697
				141.491	21.2409		133.918	8.43925		39.0559	35.6771
				141.593	21.1944		134.011	8.5315		39.0988	35.3632
				141.687	20.7754		134.106	8.62242		39.1431	35.3236
				141.797	20.5907		134.192	8.52203		39.1856	35.7303
				141.901	21.3878		134.293	8.41027		39.2367	36.225
				142.013	21.6198		134.397	8.38824		39.2868	36.4659
				142.125	21.4912		134.507	8.16192		39.3387	36.1798
				142.237	21.6299		134.61	8.3247		39.3902	36.1017
				142.328	21.6987		134.724	8.76958		39.4438	36.2059
				142.426	21.2908		134.815	8.66934		39.4866	36.4599
				142.523	21.3591		134.91	8.44953		39.5304	36.6275
				142.612	21.6619		134.999	8.71438		39.5723	36.3778
				142.718	21.8491		135.106	8.37301		39.6249	36.1481
				142.825	21.6973		135.208	8.48586		39.6757	35.8153
				142.938	21.3762		135.318	8.62295		39.7271	36.0069
				143.045	21.2746		135.421	9.19741		39.7794	36.2728
				143.132	21.4927		135.534	8.78184		39.8302	36.6144
				143.225	21.9133		135.624	8.22074		39.8752	36.9792
				143.323	21.6153		135.716	8.07671		39.9211	36.593
				143.418	21.6702		135.807	7.68327		39.9649	36.2656
				143.53	21.5717		135.915	8.36864		40.0058	36.1653
				143.637	21.2798		136.019	8.46791		40.0543	36.0787
				143.749	21.0059		136.128	8.71663		40.1042	36.4103
				143.858	21.0814		136.233	9.00053		40.1572	36.6666
				143.971	21.2547		136.343	9.11209		40.2072	37.1034
				144.065	21.2954		136.434	8.91486		40.2484	37.146
				144.159	21.4961		136.53	8.88599		40.2947	37.02
				144.254	21.3738		136.621	8.89677		40.3415	36.7276
				144.341	21.1296		136.73	8.84767		40.3838	36.5762
				144.45	20.9379		136.834	8.66831		40.4333	36.9994
				144.561	20.825		136.942	8.59426		40.4828	37.0898
				144.673	21.2043		137.05	8.54797		40.535	37.2288
				144.781	21.6433		137.157	8.4321		40.5864	37.3722
				144.871	21.7922		137.247	8.70746		40.638	37.4573
				144.967	21.2214		137.34	8.31442		40.6814	37.0367
				145.066	21.4012		137.434	8.45183		40.7277	36.7667
				145.157	20.9797		137.519	8.10815		40.7718	37.0972
				145.267	21.0659		137.623	7.95485		40.8121	37.327
				145.377	21.3494		137.729	8.3247		40.8609	37.3602
				145.49	21.4768		137.838	8.0592		40.9112	37.2871
				145.599	21.6579		137.944	8.5843		40.9628	37.0791
				145.714	21.6059		138.058	8.79261		41.0134	37.3915
				145.808	21.3285		138.148	8.8419		41.0546	37.784
				145.906	21.2898		138.241	8.58506		41.0975	37.4863
				146	21.4169		138.33	8.24639		41.144	37.408
				146.111	21.9196		138.437	8.23821		41.1872	37.754
				146.219	21.9042		138.54	8.54847		41.2383	37.366
				146.327	22.087		138.649	8.45484		41.2876	37.407
				146.43	22.4543		138.755	8.76435		41.3386	37.4194
				146.519	21.7051		138.864	8.73604		41.3877	37.4364
				146.625	21.5875		138.952	8.63322		41.4401	37.1789
				146.719	21.7871		139.046	8.12682		41.484	37.3092
				146.813	21.891		139.139	8.15271		41.5294	37.3003
				146.902	21.9306		139.223	8.8539		41.5736	36.8049
				147.009	21.8548		139.326	9.10728		41.6145	37.3884
				147.116	21.8617		139.431	9.11566		41.6632	37.4556
				147.23	21.8495		139.542	8.79834		41.7146	37.4493
				147.339	22.037		139.646	8.49482		41.7673	37.7438
				147.452	22.6793		139.732	8.87731		41.8166	37.8381
				147.543	22.2585		139.82	8.71252		41.8572	37.9913
				147.641	22.1353		139.915	8.73951		41.9007	37.8846
				147.736	21.7509		140.004	8.81337		41.946	37.8127
				147.823	21.5208		140.113	8.48369		41.9889	37.3817
				147.929	21.6112		140.215	8.50539		42.0398	37.6794
				148.038	21.8542		140.323	8.67303		42.0901	38.1959
				148.125	22.2882		140.431	8.80363		42.1429	37.9459
				148.235	22.3569		140.543	8.76836		42.1933	37.9372
				148.351	22.7893		140.631	8.90611		42.2474	37.969
				148.442	22.1971		140.723	9.03365		42.2901	37.951
				148.54	22.0711		140.811	8.64864		42.3352	37.907
				148.632	21.9582		140.92	8.43843		42.3792	38.2325
				148.743	22.2741		141.024	8.31485		42.4318	38.3184
				148.851	22.3522		141.132	8.29168		42.4807	38.612
				148.963	22.4822		141.241	8.62527		42.5326	38.2655
				149.075	21.8568		141.35	8.97587		42.5843	37.9817
				149.19	21.6528		141.442	8.87321		42.6359	37.5224
				149.282	21.5572		141.536	8.33902		42.6792	37.7128
				149.378	21.9362		141.628	8.33425		42.7253	38.0959
				149.469	21.8806		141.738	8.71264		42.7694	37.9295
				149.582	21.8299		141.841	8.89703		42.8098	38.1838
				149.689	21.9874		141.948	8.70187		42.8588	37.9535
				149.801	21.6908		142.056	8.7706		42.9094	37.7431
				149.915	21.7963		142.162	8.99125		42.9618	37.6626
				150.028	21.8591		142.252	9.02906		43.0126	38.2858
				150.123	22.1878		142.347	8.55486		43.0537	38.5711
				150.221	22.0812		142.441	8.10121		43.0963	38.3757
				150.315	22.4022		142.526	8.48903		43.1416	38.1295
				150.428	22.2421		142.629	9.00884		43.1844	37.8422
				150.535	21.9931		142.733	9.07677		43.237	37.808
				150.646	21.7641		142.844	8.81949		43.2867	38.0269
				150.759	21.6457		142.948	8.61841		43.3389	38.2595
				150.87	22.326		143.032	8.52986		43.3908	38.6542
				150.962	22.4062		143.122	9.24348		43.4431	38.9461
				151.059	22.451		143.217	9.20756		43.4852	39.2139
				151.157	21.6697		143.312	8.87668		43.5284	38.6472
				151.246	21.5469		143.396	8.79785		43.5726	38.4065
				151.351	21.7405		143.496	8.89471		43.6254	38.1709
				151.46	22.2941		143.6	9.13735		43.677	38.9834
				151.575	22.3879		143.71	8.97019		43.7273	38.8829
				151.684	22.5167		143.815	9.14081		43.779	38.9929
				151.798	22.1462		143.927	9.32419		43.8267	38.5153
				151.893	21.7188		144.018	9.1051		43.8717	38.4711
				151.996	22.1436		144.117	9.00196		43.9178	38.4169
				152.09	22.0287		144.208	8.64945		43.9613	38.7278
				152.198	22.4691		144.31	8.73353		44.0028	38.782
				152.303	22.5405		144.411	8.87266		44.0534	38.7935
				152.414	22.0511		144.519	9.24596		44.1024	38.6181
				152.526	21.8451		144.624	9.84393		44.1549	38.3769
				152.638	21.9497		144.735	9.93573		44.2061	38.6137
				152.728	22.3287		144.825	9.4639		44.2604	38.9708
				152.826	22.0878		144.919	8.76986		44.3036	38.843
				152.925	21.9783		145.011	8.83004		44.3473	38.8353
				153.013	22.5689		145.119	9.39939		44.389	39.1031
				153.118	22.6021		145.221	10.0156		44.4407	39.1056
				153.224	22.3634		145.33	10.2004		44.4911	39.0977
				153.337	22.2475		145.435	9.59974		44.5433	38.8144
				153.447	22.2767		145.545	9.39991		44.5959	38.8911
				153.564	22.3967		145.635	9.16216		44.6492	38.9238
				153.657	22.2774		145.727	9.56583		44.6921	39.4303
				153.756	22.3371		145.817	9.58411		44.7378	39.668
				153.849	21.7673		145.902	9.31771		44.7809	39.0407
				153.958	21.9788		146.007	9.11687		44.8319	38.9527
				154.065	22.0608		146.113	9.04864		44.8818	39.0153
				154.177	22.4337		146.221	9.3223		44.9331	39.4181
				154.285	22.5584		146.325	8.91916		44.9734	39.6116
				154.374	22.8292		146.414	9.12574		45.0246	39.5482
				154.465	22.2046		146.508	8.87896		45.0664	39.0301
				154.561	21.9111		146.602	8.81197		45.1111	38.9524
				154.654	22.0045		146.688	9.13572		45.1564	39.1361
				154.742	22.0493		146.795	9.23252		45.199	39.1105
				154.851	22.4862		146.9	8.85092		45.2489	39.4792
				154.961	22.3661		147.01	8.52636		45.2972	39.5061
				155.073	22.6122		147.115	8.97266		45.3505	39.513
				155.182	21.85		147.226	9.51981		45.4019	39.3393
				155.274	21.8498		147.316	9.13863		45.4539	39.3005
				155.37	21.4467		147.413	8.51566		45.4973	38.9397
				155.467	21.3461		147.502	8.22936		45.5443	38.955
				155.556	22.2324		147.61	8.33146		45.5891	39.4079
				155.666	22.5655		147.712	8.82		45.6404	39.7712
				155.777	22.9802		147.823	9.09512		45.6886	39.8077
				155.889	22.396		147.931	9.20574		45.7391	39.257
				155.999	22.5676		148.038	9.13464		45.7919	39.1882
				156.113	22.4592		148.126	9.14785		45.8432	39.4636
				156.208	22.335		148.219	8.97117		45.8855	39.9635
				156.308	22.7371		148.313	8.82926		45.9293	40.0256
				156.4	22.3181		148.398	8.70205		45.9747	39.9734
				156.511	22.5641		148.501	9.25479		46.0164	39.2648
				156.619	22.2216		148.605	9.07985		46.066	39.4811
				156.732	21.9785		148.69	9.23209		46.1154	39.6602
				156.845	22.3008		148.796	8.81002		46.1667	39.6764
				156.956	22.6381		148.907	8.96939		46.2172	39.772
				157.046	22.5974		148.995	8.88087		46.2712	40.222
				157.143	22.3598		149.087	8.76186		46.3163	40.1011
				157.24	21.7574		149.179	9.17122		46.3611	39.8899
				157.327	21.821		149.263	8.7587		46.4038	39.6195
				157.433	21.8409		149.364	8.65676		46.4556	39.33
				157.542	21.8873		149.469	8.31075		46.5042	39.8059
				157.629	22.0868		149.554	8.49558		46.5561	39.9399
				157.743	22.1719		149.659	8.93183		46.6065	40.0858
				157.855	22.605		149.771	9.38746		46.6587	39.7613
				157.945	22.0935		149.861	9.27573		46.7025	39.3466
				158.042	22.0389		149.955	9.00677		46.748	39.2636
				158.138	22.1387		150.043	8.78351		46.7904	39.0004
				158.25	22.3438		150.15	8.65191		46.8425	39.4534
				158.356	22.7616		150.255	8.6863		46.8927	40.0274
				158.465	22.6211		150.362	8.87548		46.9456	40.1084
				158.554	22.3831		150.469	9.28943		46.9965	39.8749
				158.663	21.9243		150.582	9.11733		47.0485	40.1487
				158.752	22.2392		150.672	9.20115		47.0921	40.0478
				158.845	22.044		150.764	8.52111		47.1381	39.9613
				158.939	21.9529		150.853	8.19656		47.1812	40.0314
				159.032	22.5981		150.961	8.60131		47.2335	40.4066
				159.142	22.9938		151.065	9.00285		47.2842	40.3951
				159.251	22.4174		151.173	9.40321		47.3361	40.1528
				159.364	22.1009		151.281	8.98362		47.3877	39.9849
				159.475	21.8778		151.393	8.6138		47.4387	40.0118
				159.592	22.2834		151.484	8.21569		47.4814	39.9834
				159.685	22.6819		151.578	8.76409		47.5264	40.3522
				159.78	22.489		151.668	9.06262		47.5708	40.1359
				159.87	22.3684		151.776	9.19322		47.612	39.7861
				159.982	21.7977		151.878	9.32663		47.6613	39.7665
				160.09	21.9565		151.984	8.71564		47.7126	40.038
				160.203	21.6405		152.094	8.57851		47.753	40.4157
				160.315	22.4234		152.203	8.60082		47.8037	40.9096
				160.429	23.0764		152.292	8.94564		47.8551	40.6026
				160.524	23.1729		152.387	8.40463		47.8976	40.3402
				160.622	22.5018		152.482	8.6582		47.9431	40.5137
				160.715	22.2906		152.567	8.99076		47.9875	40.4231
				160.828	22.2863		152.67	9.15152		48.0279	40.2158
				160.933	22.8326		152.774	8.84879		48.0766	40.5148
				161.044	23.3797		152.884	8.58234		48.1276	40.8368
				161.131	23.0051		152.989	8.73406		48.1686	41.0945
				161.24	22.6901		153.101	9.18816		48.2194	40.8076
				161.33	22.5808		153.193	9.67016		48.2729	40.689
				161.427	22.7088		153.289	9.02154		48.3145	40.365
				161.527	22.353		153.379	8.50249		48.3587	40.7922
				161.618	22.6301		153.485	8.49092		48.4026	40.8632
				161.727	22.822		153.585	9.05072		48.4545	41.0225
				161.833	23.058		153.694	9.67002		48.5041	41.1841
				161.948	22.9553		153.8	9.53203		48.5551	40.823
				162.057	22.6411		153.91	9.21766		48.5954	40.6669
				162.17	22.7399		153.998	8.7895		48.6459	40.9356
				162.263	22.5911		154.093	8.88333		48.6876	41.0721
				162.363	22.9089		154.188	8.92515		48.731	40.974
				162.458	22.8828		154.273	8.75966		48.7759	41.2072
				162.57	23.2761		154.373	9.26564		48.818	41.0917
				162.676	22.7691		154.476	9.6325		48.8685	40.888
				162.787	22.6158		154.583	9.38364		48.9182	40.3099
				162.896	22.7272		154.69	9.65993		48.9707	40.5549
				163.009	23.2568		154.775	9.20452		49.0199	40.8084
				163.098	23.4331		154.865	9.03405		49.0605	41.1883
				163.193	23.0419		154.96	9.19747		49.1041	40.9104
				163.294	22.9961		155.053	8.88172		49.149	40.7157
				163.386	22.6265		155.159	9.00173		49.1911	40.836
				163.493	22.7521		155.262	8.99967		49.2324	40.5894
				163.598	22.4704		155.37	8.5928		49.2821	40.5812
				163.71	22.9215		155.474	8.69528		49.3327	40.7181
				163.819	22.5976		155.586	9.06321		49.386	40.9164
				163.936	22.6907		155.674	9.37126		49.4366	41.1729
				164.029	22.6876		155.766	9.16037		49.4793	41.3326
				164.126	22.2752		155.856	8.96824		49.5234	41.2667
				164.22	21.8828		155.94	9.16191		49.5682	40.4155
				164.331	22.0034		156.047	8.97898		49.61	40.571
				164.437	22.4876		156.153	9.19656		49.6598	40.9326
				164.551	22.5124		156.262	9.31168		49.7093	41.7951
				164.657	22.6542		156.365	9.58247		49.7619	42.0085
				164.773	22.7757		156.455	9.748		49.8134	42.0146
				164.867	22.7871		156.549	9.10431		49.8671	41.748
				164.962	22.4723		156.643	8.84504		49.9126	41.1474
				165.055	22.7221		156.73	8.93432		49.9591	41.0705
				165.168	22.8376		156.835	9.091		50.002	40.9216
				165.278	23.2588		156.94	9.29711		50.0511	41.5183
				165.391	22.8663		157.049	9.37976		50.1006	41.3501
				165.5	22.7894		157.153	9.25579		50.1534	41.5476
				165.614	22.3828		157.267	9.53318		50.2056	41.089
				165.708	22.6701		157.359	8.98806		50.2572	41.2032
				165.805	22.9736		157.454	8.93512		50.2996	41.3139
				165.9	22.8056		157.543	8.64759		50.3452	41.4549
				166.013	22.5796		157.65	9.01348		50.39	41.4226
				166.122	22.5529		157.752	9.37011		50.4304	41.3203
				166.232	22.669		157.864	9.14566		50.4795	41.4903
				166.345	22.8219		157.971	9.1815		50.5292	41.4477
				166.454	22.5535		158.079	9.18252		50.582	41.3398
				166.547	22.5827		158.168	9.3429		50.6318	41.6884
				166.644	22.4316		158.261	9.31583		50.6726	42.0078
				166.741	22.7575		158.355	9.28392		50.7149	42.2656
				166.83	22.5472		158.44	9.15104		50.7611	41.6414
				166.938	22.5022		158.541	8.82099		50.8068	41.262
				167.048	22.6258		158.646	8.78411		50.8582	41.1065
				167.164	23.1424		158.73	8.82554		50.9066	41.5408
				167.271	23.1662		158.835	9.32538		50.9577	41.3866
				167.386	22.9995		158.945	9.44057		51.0076	41.4525
				167.48	22.7918		159.034	9.35661		51.0592	41.8752
				167.579	22.744		159.128	9.2346		51.102	41.6759
				167.673	22.9303		159.218	8.99993		51.1468	41.5099
				167.782	23.5407		159.327	8.78716		51.1913	41.3912
				167.888	23.5663		159.43	9.12657		51.2321	41.3944
				168.002	23.2358		159.537	9.4454		51.2809	41.5843
				168.112	22.8771		159.622	9.37207		51.3332	41.8527
				168.226	23.0119		159.728	9.1796		51.3847	42.1884
				168.317	22.8658		159.813	9.17323		51.4353	42.2705
				168.412	22.9614		159.904	8.98928		51.4769	41.9592
				168.507	23.2299		159.996	8.56828		51.5197	41.5528
				168.621	23.1018		160.085	8.44158		51.5643	41.3434
				168.73	23.0507		160.191	9.12677		51.607	41.4326
				168.839	22.7058		160.295	9.49479		51.6585	41.7356
				168.927	22.7315		160.404	9.53461		51.7084	42.0381
				169.035	22.7723		160.511	9.13386		51.7615	41.8452
				169.123	22.8722		160.623	9.25746		51.8122	41.7886
				169.216	22.8957		160.712	9.17174		51.865	41.8857
				169.312	22.944		160.804	9.55011		51.9076	41.7915
				169.405	22.6343		160.891	9.70445		51.9532	41.9307
				169.517	22.5642		160.998	9.72076		51.997	41.7912
				169.625	22.7599		161.103	9.50201		52.049	42.1932
				169.738	23.0586		161.213	9.36341		52.0987	42.2269
				169.849	23.1893		161.321	9.26221		52.1512	41.6867
				169.962	23.1912		161.432	9.20427		52.2032	41.6331
[truncated: 5,247 more rows]

## Sheet: Figure 4b
Ultrasoft hydrogel "device"	Unstrained		Stretched		Compressed			Convetional elastomer "device"	Unstrained		Stretched		Compressed
	Displacement (mm)	Peelling force (N)	Displacement (mm)	Peelling force (N)	Displacement (mm)	Peelling force (N)			Displacement (mm)	Peelling force (N)	Displacement (mm)	Peelling force (N)	Displacement (mm)	Peelling force (N)
	0	0.00346	0	0.00176	0	0.00236			0	-0.000340836	0	-0.00332	0	0.00166
	0	0.0023	0	0.00249	0	0.00279			0	-0.00161	7.47283e-06	-0.00239	0	0.000623372
	0	0.00184	0	0.00138	0	0.00222			0	-0.00198	1.99275e-05	-0.00217	0	0.000907826
	0	0.00163	0	0.00309	0	0.00206			0	-0.000717059	5.39704e-05	-0.00174	0	0.00137
	0.00136	0.00198	0.00144	0.0034	0.00144	0.00274			0.00137	-0.000460426	0.00137	-0.00203	0.00117	0.000487302
	0.00265	0.0023	0.00295	0.00383	0.00279	0.0026			0.00275	-0.000115216	0.00258	-0.00157	0.00251	0.000500064
	0.00367	0.00248	0.00407	0.00429	0.0048	0.0026			0.0039	6.71537e-05	0.00359	-0.00115	0.00389	0.000168215
	0.00496	0.00266	0.00544	0.0042	0.00599	0.00246			0.0052	0.00083756	0.0048	-0.00128	0.00574	0.000285536
	0.00644	0.0027	0.00708	0.00417	0.00742	0.00245			0.00668	0.000958395	0.00631	-0.00138	0.00796	9.1925e-05
	0.00818	0.00293	0.00903	0.0045	0.00911	0.00207			0.00846	0.000756955	0.00801	-0.00127	0.01035	0.000194544
	0.01023	0.00313	0.01121	0.00489	0.01099	0.00232			0.01074	0.000359143	0.00989	-0.000656552	0.01289	4.12274e-05
	0.01264	0.00312	0.01351	0.00469	0.01305	0.00294			0.01337	0.000359136	0.012	-0.00109	0.01545	0.000681002
	0.01529	0.00273	0.01581	0.00428	0.01526	0.00289			0.01615	0.000282579	0.01423	-0.00125	0.01784	0.000567465
	0.01809	0.00275	0.01824	0.00417	0.01758	0.00268			0.01897	-0.000138512	0.01665	-0.00117	0.02025	5.02685e-05
	0.02105	0.0022	0.02072	0.00457	0.02012	0.00283			0.02183	-0.000425623	0.01929	-0.00112	0.02273	5.71188e-05
	0.02413	0.00157	0.02328	0.00419	0.02291	0.00327			0.02468	-0.000348129	0.02219	-0.00138	0.02527	0.000892463
	0.02734	0.00147	0.02596	0.00375	0.02596	0.00295			0.02758	-0.000430883	0.02524	-0.0022	0.02788	0.00107
	0.03046	0.00177	0.02872	0.00323	0.02919	0.00246			0.03049	-0.000399541	0.02837	-0.00257	0.03066	0.000256561
	0.03358	0.00185	0.0316	0.0034	0.03243	0.00265			0.03343	-0.000414118	0.03164	-0.00287	0.03359	0.00018215
	0.03673	0.00188	0.03459	0.00384	0.03569	0.00319			0.03634	-0.000486421	0.03494	-0.00296	0.0366	0.000277102
	0.03973	0.00199	0.03764	0.00375	0.03907	0.00305			0.03938	-0.000506577	0.03825	-0.00364	0.03981	0.000746933
	0.04267	0.00218	0.04082	0.00338	0.04266	0.0026			0.04248	-0.000643485	0.04162	-0.00355	0.04318	0.000704074
	0.04573	0.00278	0.04414	0.00307	0.04632	0.0027			0.04576	-0.000757767	0.04492	-0.0035	0.04667	0.000510779
	0.04889	0.00284	0.04757	0.003	0.04998	0.00299			0.04921	-0.000523365	0.04807	-0.0032	0.05026	0.00106
	0.05226	0.00311	0.05113	0.00314	0.05379	0.00327			0.05286	-0.000413073	0.05133	-0.00283	0.05403	0.00152
	0.05594	0.00344	0.05475	0.00319	0.05772	0.00272			0.05658	-0.00016562	0.05466	-0.0031	0.05784	0.000991613
	0.05985	0.00396	0.05842	0.00315	0.06184	0.00296			0.06047	6.66637e-05	0.05808	-0.00276	0.06162	0.000350431
	0.06393	0.00394	0.06229	0.00345	0.06607	0.00365			0.06461	-0.000206642	0.06166	-0.00221	0.06549	0.00029586
	0.06813	0.00326	0.06631	0.00353	0.07028	0.00378			0.06889	-0.000694507	0.06542	-0.00187	0.06944	0.000563224
	0.07257	0.00319	0.07053	0.00335	0.0745	0.0036			0.07332	-0.000548475	0.06938	-0.00191	0.0736	0.000836602
	0.07712	0.00329	0.07505	0.00307	0.07871	0.00361			0.07773	0.000170473	0.07357	-0.00218	0.07803	0.000780998
	0.08162	0.00322	0.07984	0.00261	0.08296	0.00346			0.082	0.000464135	0.07805	-0.00188	0.0828	0.000688518
	0.08621	0.00291	0.08483	0.00247	0.08739	0.00358			0.08629	0.000762151	0.0828	-0.00153	0.08778	0.000752064
	0.09086	0.00308	0.09009	0.0025	0.0919	0.00355			0.09064	0.00134	0.0874	-0.00157	0.093	0.000885334
	0.09567	0.003	0.09558	0.00212	0.09649	0.00317			0.09533	0.00172	0.09203	-0.00218	0.09869	0.000639943
	0.10074	0.00297	0.10122	0.002	0.10123	0.00324			0.10044	0.00179	0.09697	-0.00174	0.10463	0.000332332
	0.10609	0.00249	0.1069	0.00225	0.10603	0.00327			0.10589	0.00121	0.10211	-0.00129	0.11054	9.82974e-05
	0.11174	0.00217	0.11243	0.00303	0.11092	0.00312			0.11152	0.000921364	0.10747	-0.00125	0.11634	0.000111051
	0.11786	0.00217	0.1177	0.00355	0.11594	0.00302			0.11757	0.00118	0.11306	-0.00161	0.12181	0.000303412
	0.12414	0.00214	0.12285	0.00327	0.12122	0.00269			0.12385	0.001	0.1188	-0.0018	0.12709	0.00031208
	0.13047	0.00224	0.12802	0.00297	0.12683	0.00236			0.13008	0.00043755	0.1248	-0.00134	0.13225	0.00068498
	0.13672	0.00245	0.13334	0.00356	0.13278	0.00297			0.13608	-9.06349e-06	0.13112	-0.00145	0.13749	0.000458065
	0.14262	0.00257	0.13886	0.00376	0.13907	0.00306			0.14173	0.000286875	0.13755	-0.00199	0.14291	4.0476e-05
	0.1482	0.00243	0.14456	0.00364	0.14555	0.00292			0.14722	0.000514526	0.14393	-0.00244	0.1485	0.000100166
	0.15375	0.00264	0.1504	0.00352	0.15232	0.00289			0.15279	0.000179399	0.15006	-0.00236	0.15436	0.000652961
	0.15938	0.00273	0.15619	0.00384	0.15909	0.00335			0.15858	-0.000521156	0.15597	-0.00244	0.16039	0.000764261
	0.1652	0.00285	0.16197	0.00386	0.16564	0.0033			0.16464	-0.000194048	0.16179	-0.00255	0.16651	0.00092074
	0.1714	0.00302	0.16782	0.0034	0.17214	0.00321			0.17096	0.000402928	0.1676	-0.00252	0.17274	0.000687126
	0.1779	0.00372	0.17407	0.00239	0.17857	0.00304			0.17758	0.000408529	0.17363	-0.00192	0.17913	0.00099876
	0.18446	0.00417	0.18079	0.00239	0.18504	0.00344			0.18405	0.000702457	0.17996	-0.00133	0.18577	0.000336766
	0.19115	0.00417	0.18794	0.00298	0.19167	0.00444			0.19053	0.000773435	0.18636	-0.000984941	0.19283	0.000455093
	0.19807	0.00433	0.19559	0.00283	0.19837	0.00459			0.19744	0.00139	0.19291	-0.000865574	0.20041	0.000914829
	0.20539	0.00417	0.20358	0.00299	0.20522	0.00486			0.20472	0.000965904	0.19974	-0.000691635	0.20848	0.000585968
	0.21313	0.00409	0.21157	0.0031	0.21189	0.00525			0.21234	0.000211895	0.20701	-0.000221321	0.21671	0.000175151
	0.22118	0.00363	0.21912	0.00324	0.2185	0.00532			0.22053	-7.62171e-05	0.21462	-8.92591e-06	0.22456	0.000460713
	0.22946	0.00343	0.22627	0.00319	0.2255	0.0048			0.22899	0.000396795	0.2226	-0.000129619	0.23187	0.000439001
	0.23774	0.00331	0.23338	0.00341	0.23301	0.00445			0.23734	0.000783238	0.23094	-0.000338492	0.239	0.000599968
	0.24567	0.00324	0.24067	0.00325	0.24112	0.00425			0.2452	0.000290793	0.23939	-0.000654149	0.24614	0.000600519
	0.25323	0.00294	0.24816	0.00367	0.24976	0.00437			0.2526	2.26993e-05	0.24765	-0.000567335	0.25356	0.000557608
	0.26068	0.00275	0.2558	0.00417	0.2586	0.00432			0.25996	-0.000218586	0.25555	-0.000576503	0.26121	0.000111225
	0.26825	0.0025	0.26334	0.00425	0.26719	0.00392			0.26745	0.000503016	0.26323	-0.00119	0.26884	0.0002659
	0.27597	0.00233	0.27098	0.00384	0.27537	0.00316			0.2754	0.000979436	0.27094	-0.00144	0.27649	0.00066044
	0.28392	0.00277	0.279	0.00281	0.28336	0.00282			0.28349	0.00103	0.27865	-0.000972142	0.28444	0.000439361
	0.29208	0.00269	0.28742	0.00294	0.29134	0.00295			0.29147	0.000261887	0.28629	-0.000497654	0.29274	0.000294979
	0.30048	0.00248	0.29631	0.00335	0.29925	0.00317			0.29964	0.000277977	0.29395	-0.000926124	0.30165	0.000223621
	0.30921	0.00186	0.30551	0.00335	0.30734	0.00362			0.30816	0.000151703	0.30184	-0.00162	0.31088	0.000332834
	0.31819	0.00171	0.31452	0.00261	0.31518	0.00398			0.31704	-0.000296132	0.31013	-0.00137	0.32003	0.000388159
	0.32743	0.00187	0.32271	0.00285	0.3229	0.00418			0.32641	-0.00058166	0.31878	-0.00108	0.32867	0.000308467
	0.33648	0.00205	0.33057	0.00333	0.33102	0.00415			0.33564	-1.03964e-05	0.32792	-0.00102	0.3368	0.000430536
	0.3451	0.00162	0.33849	0.0035	0.33954	0.00375			0.34435	0.000548678	0.33714	-0.0016	0.34467	0.000908613
	0.35319	0.00219	0.34661	0.00301	0.34841	0.00339			0.35253	0.000235978	0.346	-0.00183	0.35257	0.00114
	0.36102	0.00267	0.35474	0.00341	0.3575	0.00336			0.3604	-0.000660573	0.35433	-0.00153	0.36045	0.000572486
	0.36881	0.00323	0.36265	0.00416	0.36638	0.00331			0.36827	-0.000644651	0.36236	-0.00147	0.36811	5.90471e-05
	0.3766	0.00389	0.37062	0.00394	0.3747	0.00302			0.37621	0.001	0.37026	-0.00212	0.37587	0.000291635
	0.38432	0.00424	0.37895	0.00326	0.38257	0.00276			0.38409	0.00199	0.37819	-0.00153	0.3841	0.000745096
	0.39212	0.00442	0.3877	0.00287	0.39048	0.00285			0.39196	0.00196	0.38592	-0.00031917	0.39257	0.000920921
	0.40018	0.00416	0.39682	0.00331	0.39841	0.0032			0.40018	0.00147	0.39348	2.04995e-05	0.40148	0.000938588
	0.40863	0.00359	0.40609	0.00358	0.4064	0.00372			0.40883	0.00177	0.40121	-0.000191178	0.41064	0.00067272
	0.41756	0.00316	0.41511	0.00332	0.4143	0.00379			0.41778	0.00196	0.40941	-0.000757575	0.41955	0.0015
	0.42679	0.00329	0.42359	0.00255	0.42221	0.00367			0.42702	0.00145	0.41816	-0.000808851	0.42794	0.00152
	0.43589	0.00317	0.43156	0.00263	0.4305	0.00343			0.43608	0.00101	0.42729	-0.000188644	0.43594	0.000645664
	0.44445	0.0028	0.43945	0.00276	0.43921	0.00415			0.4447	0.0014	0.43645	-0.000182061	0.44395	2.29341e-05
	0.4525	0.00197	0.44736	0.00307	0.44842	0.00462			0.4528	0.00209	0.44528	-0.000949888	0.45201	0.000274
	0.46037	0.00143	0.45531	0.00336	0.4579	0.00461			0.46068	0.00198	0.45352	-0.00118	0.45987	0.000277489
	0.46819	0.00172	0.46321	0.0039	0.46701	0.00493			0.46851	0.00154	0.46149	-0.00104	0.46753	0.000324712
	0.47606	0.00275	0.4712	0.00393	0.47537	0.00453			0.47637	0.00186	0.46947	-0.000525542	0.4753	0.000874295
	0.48373	0.00326	0.47957	0.00364	0.48333	0.00404			0.48411	0.00251	0.47757	-0.00036523	0.4837	0.000723143
	0.49141	0.00331	0.48824	0.00342	0.49129	0.00326			0.49187	0.00274	0.4855	-0.000278281	0.49252	0.000105057
	0.49932	0.00316	0.49743	0.00354	0.49914	0.00326			0.4999	0.00179	0.49314	-9.64925e-05	0.50171	0.000614794
	0.5077	0.00322	0.50676	0.00369	0.50719	0.00365			0.50834	0.00136	0.50089	1.23205e-07	0.51102	0.00122
	0.51655	0.00333	0.51577	0.00379	0.51504	0.00403			0.5172	0.00161	0.50907	6.28748e-05	0.51998	0.00112
	0.5257	0.0031	0.52409	0.00366	0.52299	0.00343			0.52651	0.00212	0.51765	-0.000436049	0.52829	0.000150596
	0.53484	0.00324	0.53212	0.00365	0.53124	0.00267			0.53583	0.00182	0.52666	-0.000729811	0.53637	4.0732e-05
	0.54349	0.00318	0.54022	0.00375	0.53997	0.00258			0.54461	0.000819216	0.53591	-0.00049288	0.54453	0.000717163
	0.55164	0.00307	0.54829	0.00394	0.54927	0.00223			0.55269	0.000337834	0.54467	-0.000726036	0.55272	0.00108
	0.55958	0.00261	0.55626	0.00465	0.55871	0.00232			0.56053	0.000672375	0.55289	-0.00173	0.56073	0.000964757
	0.56754	0.0025	0.56403	0.00493	0.56776	0.00234			0.56839	0.0012	0.56095	-0.00266	0.5685	0.000184972
	0.57556	0.0032	0.57193	0.00458	0.57612	0.00236			0.57625	0.00139	0.56891	-0.00248	0.57628	0.000261645
	0.58345	0.0041	0.58019	0.00389	0.58405	0.00229			0.5839	0.00225	0.57686	-0.00158	0.58445	0.000204249
	0.59121	0.00429	0.58898	0.00356	0.5919	0.00295			0.59155	0.00297	0.58472	-0.000600864	0.59315	8.81787e-05
	0.59916	0.00383	0.59813	0.00378	0.59984	0.0034			0.59944	0.00318	0.59252	-0.000811627	0.60255	0.000840333
	0.60764	0.00352	0.60719	0.00402	0.60773	0.00432			0.60789	0.00267	0.6005	-0.000919882	0.61195	0.00119
	0.61644	0.00362	0.61605	0.00386	0.61559	0.00487			0.61686	0.0022	0.60898	-0.000595038	0.62086	0.00143
	0.6255	0.00431	0.62448	0.0035	0.62351	0.00464			0.62618	0.00278	0.61783	-0.000306389	0.62902	0.00199
	0.63443	0.00428	0.63247	0.00341	0.63173	0.00456			0.63526	0.00373	0.62709	-0.000358256	0.63688	0.00236
	0.64278	0.00375	0.64048	0.00333	0.64044	0.00433			0.64376	0.00393	0.63641	-0.000523082	0.64491	0.00245
	0.65093	0.00349	0.64845	0.00357	0.64967	0.00411			0.65175	0.00316	0.64523	6.89999e-05	0.65302	0.00137
	0.65903	0.00359	0.65632	0.00407	0.65915	0.00415			0.65964	0.00312	0.65339	-7.77281e-05	0.66112	6.04671e-05
	0.66716	0.00315	0.66407	0.00481	0.66824	0.00436			0.66758	0.00376	0.6614	-7.90762e-05	0.66898	0.000415288
	0.67524	0.00307	0.67197	0.00528	0.67672	0.0036			0.67567	0.00487	0.66947	-0.000442507	0.67685	0.000109904
	0.6831	0.00322	0.68026	0.0051	0.68462	0.003			0.68348	0.00491	0.67753	-0.00019309	0.68499	0.000334299
	0.69095	0.00379	0.68895	0.00496	0.69231	0.00271			0.69114	0.00427	0.68554	0.000881294	0.69357	0.000177929
	0.69914	0.00365	0.69797	0.00528	0.70013	0.00262			0.6991	0.00406	0.69336	0.00142	0.70276	4.09047e-05
	0.70765	0.00253	0.70706	0.0058	0.70801	0.00304			0.70752	0.00417	0.70137	0.000725015	0.71206	0.000117354
	0.71671	0.00212	0.71584	0.00563	0.71577	0.00328			0.71637	0.00393	0.70973	1.9286e-05	0.72107	0.000103478
	0.72605	0.00252	0.72413	0.00533	0.72359	0.00362			0.72559	0.00347	0.71859	-0.000155868	0.72938	5.58093e-05
	0.7351	0.00307	0.7321	0.00524	0.73164	0.00357			0.73473	0.00335	0.72797	0.000106283	0.73726	0.000412176
	0.74356	0.00288	0.73993	0.00493	0.74007	0.00349			0.74309	0.00336	0.73733	0.000610809	0.74511	0.0001016
	0.75154	0.00251	0.7479	0.00507	0.749	0.00308			0.75102	0.00286	0.74612	-0.000264814	0.75319	0.000297759
	0.75944	0.00244	0.75576	0.0052	0.75838	0.00323			0.75892	0.0019	0.75422	-0.000708373	0.76133	0.00028252
	0.76737	0.00251	0.76332	0.00545	0.76766	0.00357			0.76691	0.00162	0.76203	-0.00060382	0.76925	0.000785136
	0.77538	0.00314	0.7711	0.00528	0.77614	0.00323			0.77497	0.0026	0.77001	-0.000317583	0.77715	0.000676664
	0.78338	0.00362	0.77922	0.00485	0.78406	0.00338			0.7829	0.00365	0.77815	-0.00021521	0.78525	0.000127312
	0.79135	0.0041	0.78755	0.00423	0.79184	0.00371			0.79083	0.00399	0.78608	6.82044e-05	0.79361	0.000768172
	0.79964	0.00432	0.79661	0.00442	0.79958	0.00421			0.799	0.00361	0.79377	0.000691892	0.80257	0.000882694
	0.80818	0.00412	0.8059	0.00484	0.80742	0.00463			0.80755	0.00308	0.80167	0.00152	0.81185	0.000578581
	0.81728	0.00368	0.81498	0.0045	0.81521	0.00538			0.81651	0.00384	0.80998	0.00127	0.82085	0.00101
	0.82665	0.00333	0.82346	0.00415	0.82311	0.0056			0.8258	0.00412	0.81877	0.00086209	0.82928	0.00155
	0.83577	0.00328	0.83145	0.0043	0.83126	0.00545			0.83491	0.00408	0.82802	0.00118	0.83724	0.00178
	0.84429	0.00328	0.83937	0.00459	0.83968	0.005			0.84347	0.00397	0.8373	0.00209	0.84498	0.00188
	0.85239	0.00334	0.84745	0.0049	0.84854	0.00464			0.85151	0.00419	0.84614	0.00238	0.85292	0.00149
	0.86037	0.00287	0.85545	0.00564	0.85778	0.00493			0.85943	0.00497	0.85427	0.00151	0.86097	0.000844987
	0.86837	0.00238	0.86265	0.0054	0.86691	0.00467			0.86734	0.00544	0.8621	0.00119	0.86881	0.000478118
	0.87623	0.00265	0.87012	0.0051	0.87549	0.00458			0.87534	0.00553	0.86999	0.00146	0.87672	0.000334169
	0.88397	0.00318	0.87856	0.00464	0.88345	0.00425			0.88329	0.0057	0.8781	0.00223	0.88487	0.000531221
	0.89187	0.0036	0.88758	0.00409	0.89116	0.00384			0.89129	0.00643	0.88612	0.00225	0.89336	0.000174879
	0.90019	0.00307	0.89697	0.00436	0.89904	0.00389			0.89961	0.00591	0.8939	0.00209	0.90234	0.000386088
	0.90893	0.00258	0.90636	0.00482	0.90681	0.00399			0.90825	0.00522	0.90187	0.002	0.91136	0.000125407
	0.918	0.00276	0.91518	0.00472	0.91444	0.0046			0.91738	0.00467	0.91006	0.00182	0.92012	6.55973e-05
	0.92711	0.00235	0.9232	0.00428	0.92232	0.0047			0.92671	0.00485	0.91866	0.00156	0.92847	0.000120732
	0.936	0.00212	0.93102	0.00428	0.93051	0.0046			0.93574	0.00519	0.92775	0.00114	0.93646	8.55828e-06
	0.94444	0.00151	0.93893	0.00432	0.93897	0.00429			0.94426	0.00439	0.937	0.000963834	0.94427	0.000110372
	0.95257	0.00193	0.94695	0.00473	0.94781	0.00455			0.95235	0.0036	0.94582	0.00129	0.95219	0.000378444
	0.96053	0.00236	0.95499	0.00558	0.95717	0.00453			0.9603	0.0033	0.9539	0.00145	0.96016	0.00039493
	0.96843	0.0024	0.96286	0.00557	0.96638	0.00445			0.96831	0.00414	0.96167	0.00102	0.968	0.000168162
	0.97638	0.00212	0.97088	0.00546	0.97491	0.00432			0.97625	0.00452	0.96942	0.00059245	0.97608	0.000505092
	0.98414	0.00285	0.97933	0.00523	0.98298	0.00434			0.98404	0.00506	0.97736	0.00105	0.98448	0.00081752
	0.99193	0.0032	0.98813	0.0054	0.99093	0.00495			0.99199	0.00505	0.98534	0.00162	0.99308	0.000973859
	1.00007	0.00336	0.99741	0.00488	0.99888	0.00474			1.00025	0.00523	0.99308	0.0025	1.0021	0.0008265
	1.00855	0.00311	1.00672	0.00495	1.00667	0.00487			1.0089	0.00539	1.00104	0.00233	1.01115	0.000451529
	1.01753	0.00278	1.01549	0.00443	1.01433	0.00538			1.01796	0.00534	1.00926	0.00191	1.01975	0.00091761
	1.02685	0.00335	1.02359	0.00418	1.02221	0.00561			1.02714	0.00529	1.01791	0.00208	1.02794	0.00173
	1.03584	0.0035	1.03144	0.00399	1.03068	0.00536			1.03611	0.00522	1.02699	0.00214	1.03587	0.00153
	1.04432	0.00273	1.03923	0.00341	1.03953	0.00517			1.04455	0.00547	1.03615	0.00224	1.04383	0.00133
	1.05238	0.00229	1.04719	0.00414	1.04868	0.0054			1.05255	0.00528	1.04504	0.00195	1.05182	0.00143
	1.06032	0.00224	1.05527	0.00458	1.05788	0.00612			1.06058	0.0052	1.05344	0.00186	1.05986	0.000751741
	1.06824	0.00228	1.06326	0.00483	1.06668	0.00578			1.06858	0.00511	1.06145	0.00199	1.06766	0.000289486
	1.0763	0.00322	1.07136	0.00445	1.07501	0.00475			1.07648	0.0063	1.06932	0.00229	1.07566	0.000275564
	1.084	0.00332	1.07959	0.00438	1.08306	0.00459			1.0842	0.00712	1.0773	0.00224	1.08416	0.00101
	1.09169	0.00352	1.08833	0.00447	1.09101	0.00509			1.092	0.00725	1.08518	0.00256	1.09306	0.00177
	1.09974	0.00387	1.09763	0.00464	1.09903	0.00512			1.10021	0.00643	1.09287	0.00355	1.10243	0.00173
	1.10817	0.00367	1.10709	0.0048	1.10699	0.00516			1.10867	0.00628	1.1009	0.00364	1.11172	0.000771728
	1.11721	0.00336	1.11615	0.00522	1.11471	0.00514			1.11771	0.00674	1.10936	0.00303	1.12051	0.000635974
	1.12642	0.00318	1.12452	0.00548	1.12264	0.00513			1.12695	0.00707	1.11807	0.00258	1.1286	0.00145
	1.1353	0.00346	1.1325	0.00537	1.13106	0.00528			1.13594	0.00692	1.12708	0.00293	1.13646	0.00119
	1.14363	0.00353	1.1403	0.00543	1.13994	0.00468			1.14434	0.00609	1.1361	0.00349	1.14431	0.00094736
	1.15159	0.00402	1.14817	0.00572	1.14933	0.00459			1.15226	0.00631	1.14472	0.00292	1.15226	0.000436513
	1.15956	0.00378	1.15598	0.00634	1.15869	0.00483			1.1601	0.00616	1.15288	0.00216	1.16035	0.0003884
	1.16758	0.0038	1.16377	0.00647	1.1675	0.00522			1.16804	0.00586	1.16082	0.00173	1.16819	0.000112548
	1.17568	0.00477	1.17174	0.00607	1.17573	0.00486			1.17599	0.00591	1.1687	0.00192	1.17616	6.04515e-05
	1.18358	0.00537	1.18016	0.00564	1.1837	0.00493			1.18355	0.00673	1.17666	0.00189	1.18462	7.50193e-05
	1.1914	0.00545	1.18908	0.00503	1.19167	0.00526			1.1912	0.00737	1.18464	0.0022	1.19367	0.00090903
	1.19948	0.00499	1.19852	0.00487	1.19979	0.00624			1.19927	0.00718	1.19236	0.00244	1.20313	0.00138
	1.20785	0.00507	1.20793	0.00472	1.20787	0.00703			1.20784	0.00695	1.20046	0.00239	1.21248	0.000901998
	1.21661	0.00491	1.21681	0.00431	1.21561	0.00714			1.21694	0.00706	1.20917	0.00207	1.22124	0.00134
	1.22582	0.00511	1.22499	0.00428	1.22343	0.00666			1.22619	0.00814	1.21826	0.00169	1.22935	0.00218
	1.23481	0.0047	1.23283	0.00427	1.23159	0.00617			1.23504	0.0087	1.22764	0.0017	1.2372	0.00283
	1.24323	0.00406	1.2406	0.00399	1.24025	0.00619			1.24339	0.00835	1.23686	0.00237	1.2451	0.00279
	1.25116	0.00393	1.24842	0.00449	1.2496	0.00611			1.25141	0.00856	1.24548	0.00248	1.25308	0.00231
	1.25894	0.00377	1.25619	0.005	1.25908	0.00644			1.25928	0.00894	1.2536	0.00221	1.26106	0.00144
	1.26681	0.00321	1.26395	0.0056	1.2681	0.00609			1.26727	0.0091	1.26151	0.00247	1.26895	0.000807958
	1.27489	0.0034	1.27192	0.00568	1.27632	0.00568			1.27542	0.00968	1.26932	0.00236	1.27693	0.00057641
	1.28286	0.00386	1.28021	0.00536	1.28409	0.00555			1.28325	0.01009	1.2773	0.00294	1.28524	0.000805992
	1.29087	0.00432	1.289	0.00552	1.29187	0.00493			1.29107	0.00996	1.28526	0.00382	1.29415	0.000927279
	1.2992	0.00397	1.29827	0.006	1.29991	0.00431			1.29928	0.0098	1.29304	0.00413	1.30364	0.000674575
	1.3079	0.00363	1.30751	0.00601	1.30791	0.00506			1.30786	0.00993	1.30105	0.00339	1.31314	0.000134814
	1.31704	0.00348	1.31628	0.00587	1.31573	0.00615			1.31684	0.00975	1.30963	0.00302	1.32202	0.000233507
	1.32636	0.00375	1.32439	0.00598	1.32368	0.0063			1.326	0.0097	1.31876	0.0026	1.33023	0.000168025
	1.33534	0.0041	1.33223	0.0058	1.33185	0.00553			1.33481	0.00954	1.32831	0.00301	1.33807	0.000232208
	1.34365	0.00349	1.34004	0.00598	1.34033	0.0053			1.34299	0.00963	1.33767	0.00311	1.34569	0.000106228
	1.35149	0.00305	1.34785	0.00622	1.34939	0.00583			1.35082	0.01	1.34625	0.00235	1.35341	0.00011123
	1.35921	0.00275	1.35552	0.00647	1.3587	0.00628			1.35875	0.00915	1.35421	0.00207	1.36114	0.000276485
	1.36704	0.0033	1.36315	0.00666	1.36771	0.0055			1.36672	0.00895	1.36206	0.00203	1.36888	0.000821463
	1.37523	0.0039	1.37103	0.00644	1.37605	0.00511			1.37484	0.01001	1.37004	0.00178	1.37685	0.000576491
	1.38322	0.00433	1.37935	0.0059	1.38395	0.00558			1.38274	0.01071	1.37827	0.00169	1.38505	0.000124342
	1.39121	0.00463	1.3881	0.0057	1.39166	0.00627			1.39075	0.0105	1.38634	0.00264	1.39378	0.000974555
	1.39956	0.00433	1.3972	0.00575	1.39949	0.00622			1.39918	0.00962	1.39397	0.0032	1.40297	0.00113
	1.40843	0.0046	1.40635	0.0055	1.40743	0.00653			1.40799	0.00993	1.40193	0.0031	1.41233	0.000680206
	1.41766	0.00401	1.41517	0.00533	1.41516	0.00714			1.41725	0.0106	1.41031	0.00247	1.42127	0.000984151
	1.4271	0.00438	1.42344	0.0048	1.42309	0.0071			1.42674	0.01086	1.41929	0.00223	1.42946	0.00112
	1.43619	0.00439	1.43144	0.00467	1.4313	0.00685			1.43568	0.01082	1.4288	0.00275	1.43725	0.0014
	1.44461	0.00449	1.43938	0.00506	1.43988	0.00635			1.44389	0.01066	1.43815	0.00327	1.44492	0.00155
	1.45263	0.00405	1.44731	0.0054	1.44891	0.00624			1.45169	0.01116	1.44681	0.00333	1.45248	0.00148
	1.46045	0.00354	1.45515	0.00604	1.458	0.00686			1.45946	0.01122	1.4548	0.00312	1.46016	0.00108
	1.46833	0.00376	1.4628	0.00597	1.46679	0.007			1.46736	0.01136	1.46254	0.00311	1.46811	0.000336428
	1.47622	0.00375	1.47035	0.00568	1.47514	0.00663			1.47552	0.01171	1.47034	0.00304	1.4762	5.98148e-05
	1.48407	0.00442	1.47859	0.00547	1.4831	0.00656			1.48343	0.01243	1.47828	0.00374	1.48458	0.000179494
	1.492	0.00427	1.48752	0.00587	1.49094	0.00634			1.49135	0.01259	1.48618	0.00441	1.49329	0.000313227
	1.50026	0.0042	1.4968	0.0059	1.49877	0.00677			1.49977	0.01205	1.49395	0.00455	1.50229	0.000496704
	1.50906	0.00335	1.50608	0.00581	1.50662	0.00744			1.50857	0.01148	1.50198	0.00419	1.51146	0.000737104
	1.51833	0.00391	1.51469	0.00567	1.51439	0.00692			1.51781	0.01121	1.5103	0.00383	1.52028	0.000663547
	1.52768	0.00413	1.52281	0.00541	1.52244	0.00613			1.52716	0.01185	1.51907	0.0036	1.52846	0.000551762
	1.5366	0.00352	1.53084	0.0057	1.53083	0.00618			1.5361	0.0122	1.52837	0.00326	1.53629	0.000911131
	1.54495	0.00339	1.53881	0.00587	1.53943	0.00626			1.54433	0.01162	1.53773	0.00308	1.54409	0.00125
	1.55284	0.00366	1.5468	0.00689	1.54845	0.00612			1.55221	0.01106	1.54646	0.00323	1.55197	0.000948781
	1.56063	0.00436	1.55458	0.00749	1.55754	0.00577			1.5601	0.01118	1.55456	0.00359	1.55969	9.54618e-05
	1.56852	0.00456	1.56235	0.00775	1.56629	0.00577			1.56804	0.01173	1.56231	0.0031	1.56734	0.000127908
	1.57631	0.00482	1.57046	0.00718	1.57452	0.00642			1.57603	0.0125	1.57001	0.00257	1.57533	0.000576626
	1.58397	0.00522	1.57907	0.00712	1.58256	0.00678			1.58391	0.01314	1.57781	0.00285	1.58374	0.00124
	1.59184	0.00577	1.58803	0.00739	1.59054	0.00641			1.59194	0.01298	1.58555	0.00393	1.59244	0.00138
	1.6001	0.00554	1.59726	0.00765	1.59849	0.00694			1.60034	0.0132	1.59327	0.00443	1.60157	0.00184
	1.60873	0.00533	1.6064	0.0075	1.6064	0.00806			1.60906	0.01307	1.60119	0.00417	1.61084	0.00228
	1.61786	0.00574	1.61506	0.00668	1.61417	0.00861			1.6183	0.01259	1.60945	0.00403	1.61942	0.00241
	1.62721	0.00617	1.62318	0.00621	1.62223	0.00817			1.6277	0.01297	1.61818	0.00444	1.62762	0.00203
	1.63624	0.00622	1.63136	0.00583	1.63078	0.008			1.63663	0.01371	1.62732	0.0047	1.63578	0.00175
	1.64458	0.00558	1.63951	0.00605	1.63964	0.00882			1.64469	0.01413	1.63651	0.00467	1.64391	0.00202
	1.65247	0.00509	1.6475	0.00631	1.64848	0.00877			1.652	0.01366	1.64529	0.00456	1.65194	0.00208
	1.6602	0.00495	1.65536	0.00678	1.65731	0.00849			1.65939	0.0132	1.65353	0.00499	1.65979	0.00127
	1.66791	0.00549	1.66314	0.0069	1.66594	0.0075			1.66713	0.01346	1.66145	0.00526	1.66744	0.000492134
	1.6756	0.00596	1.67117	0.00657	1.67431	0.00697			1.67509	0.01431	1.66936	0.00506	1.67546	0.000845594
	1.68328	0.00601	1.67961	0.00632	1.68279	0.00715			1.6833	0.0148	1.67731	0.00515	1.68405	0.000779537
	1.69116	0.00592	1.68861	0.00635	1.69114	0.00724			1.69157	0.01507	1.68503	0.00577	1.69302	0.000531225
	1.6993	0.00567	1.69795	0.00722	1.69936	0.0072			1.69972	0.01468	1.6927	0.00593	1.70232	0.000497992
	1.70798	0.00539	1.70689	0.00717	1.70752	0.00745			1.70846	0.01409	1.70087	0.00578	1.71148	0.000431752
	1.71708	0.00521	1.71478	0.00653	1.71535	0.00748			1.71763	0.01343	1.70934	0.00545	1.72005	0.000880973
	1.72636	0.00526	1.72287	0.00663	1.72329	0.00667			1.7265	0.01244	1.71804	0.00503	1.72823	0.00129
	1.73532	0.00534	1.73139	0.00674	1.73174	0.0067			1.73566	0.01269	1.72715	0.00513	1.73628	0.000769915
	1.74362	0.00572	1.7398	0.00707	1.74076	0.00623			1.74469	0.01298	1.73621	0.00499	1.74426	0.000230707
	1.75156	0.00561	1.74818	0.00797	1.75008	0.00691			1.75302	0.01315	1.74464	0.00473	1.75211	0.000461549
	1.7595	0.00565	1.75621	0.00838	1.75928	0.00771			1.76094	0.01364	1.75276	0.00446	1.75945	0.0011
	1.7675	0.00597	1.76398	0.00799	1.76798	0.00766			1.76871	0.01387	1.76089	0.00445	1.76672	0.000519859
	1.77541	0.00636	1.77195	0.00793	1.77596	0.00757			1.77639	0.01413	1.76888	0.00442	1.77472	0.000216825
	1.78314	0.00695	1.78034	0.00701	1.78381	0.00756			1.784	0.0147	1.77683	0.0051	1.78361	6.84834e-05
	1.79092	0.00643	1.78931	0.00692	1.79178	0.00795			1.79171	0.01519	1.7845	0.00578	1.79263	0.000397058
	1.79909	0.00591	1.79859	0.00733	1.79976	0.00877			1.79985	0.01567	1.79215	0.00572	1.80223	0.000441689
	1.80768	0.00591	1.8077	0.00752	1.80754	0.00931			1.80851	0.01622	1.80035	0.00571	1.81163	0.000566164
	1.81665	0.00616	1.81629	0.00768	1.81532	0.00922			1.8176	0.01638	1.80913	0.00558	1.81969	0.00028605
	1.82581	0.00571	1.82429	0.00717	1.82326	0.00909			1.82686	0.01681	1.81831	0.00565	1.82771	0.000742373
	1.8345	0.00518	1.83205	0.00635	1.83159	0.00849			1.83575	0.017	1.82766	0.00562	1.83648	0.0014
	1.84282	0.00462	1.83996	0.00636	1.84056	0.00817			1.84399	0.01709	1.8367	0.00574	1.84522	0.00179
	1.85083	0.00498	1.84802	0.00719	1.8501	0.00871			1.85192	0.01742	1.84507	0.00548	1.85378	0.000631529
	1.85881	0.00548	1.85611	0.0079	1.85954	0.00902			1.85985	0.01799	1.85311	0.00566	1.86179	0.00078459
	1.86689	0.00526	1.86404	0.00871	1.86838	0.00886			1.86784	0.01855	1.86116	0.00578	1.86957	0.000880775
	1.87482	0.00562	1.87183	0.0088	1.87652	0.00874			1.87563	0.01899	1.86923	0.00545	1.87752	0.000194906
	1.8826	0.00524	1.87937	0.00838	1.88431	0.00839			1.88318	0.01882	1.87727	0.00613	1.88581	0.000151502
	1.89056	0.00535	1.88741	0.00763	1.89216	0.00828			1.89095	0.0186	1.8851	0.00636	1.89461	7.45969e-05
	1.89904	0.00484	1.8971	0.00758	1.90014	0.00859			1.89913	0.01888	1.89284	0.00672	1.90389	0.000531341
	1.90786	0.00492	1.90715	0.00782	1.90797	0.00925			1.9077	0.01866	1.90096	0.00603	1.91306	0.000513646
	1.91708	0.00494	1.91625	0.00786	1.9158	0.00953			1.91676	0.01838	1.90958	0.00578	1.92158	0.000546824
	1.92635	0.00537	1.92448	0.00846	1.92373	0.00945			1.92603	0.01844	1.91877	0.00587	1.92949	0.000629837
	1.93514	0.00497	1.9323	0.00838	1.93196	0.00857			1.93476	0.018	1.92798	0.00621	1.93724	0.000543465
	1.94331	0.00421	1.94007	0.00767	1.94063	0.00785			1.94285	0.01753	1.93718	0.00622	1.94514	0.000492807
	1.95136	0.00428	1.94807	0.0082	1.94981	0.00788			1.95072	0.01748	1.94577	0.00588	1.95328	0.000808946
	1.95937	0.00458	1.9558	0.00926	1.95918	0.0081			1.95861	0.01742	1.95388	0.00594	1.96142	0.00117
	1.96737	0.00567	1.96342	0.00964	1.96804	0.00804			1.96665	0.01786	1.96186	0.00582	1.96921	0.00139
	1.97534	0.00592	1.97147	0.00931	1.97621	0.00762			1.9746	0.01867	1.96994	0.00643	1.97715	0.000967666
	1.98326	0.00631	1.97956	0.00869	1.98395	0.00727			1.98233	0.01843	1.97787	0.00655	1.98542	0.000156891
	1.99139	0.00587	1.98818	0.00886	1.99158	0.00752			1.99033	0.0187	1.98564	0.00726	1.99414	0.000530527
	1.99982	0.00603	1.99739	0.0091	1.99934	0.00804			1.9988	0.01885	1.99345	0.00775	2.00321	0.000871265
	2.00861	0.00651	2.00658	0.00825	2.00712	0.00865			2.0076	0.01862	2.00158	0.00786	2.01233	0.000270515
	2.01787	0.00657	2.0154	0.00834	2.01504	0.00904			2.01698	0.01912	2.01008	0.0075	2.02105	2.7566e-05
	2.0271	0.00691	2.02362	0.00882	2.02307	0.00968			2.02631	0.01971	2.01919	0.0073	2.02919	0.000550878
	2.03586	0.007	2.03158	0.00846	2.03139	0.00994			2.03511	0.01993	2.02865	0.00785	2.03702	0.00105
	2.044	0.00708	2.03953	0.0076	2.04004	0.0097			2.04335	0.01984	2.03782	0.00822	2.04481	0.00122
	2.05198	0.00671	2.04732	0.00792	2.04913	0.00974			2.05137	0.02044	2.04627	0.00811	2.05288	0.000869427
	2.06005	0.00651	2.05494	0.00865	2.05828	0.01003			2.05932	0.02088	2.05419	0.00745	2.06075	0.000586918
	2.06809	0.00649	2.0629	0.0089	2.06704	0.01021			2.06734	0.02167	2.06196	0.00759	2.06854	0.00012811
	2.07599	0.00729	2.07135	0.00885	2.07521	0.0098			2.07529	0.02195	2.06994	0.00786	2.07659	0.000349243
	2.08381	0.00724	2.07997	0.00871	2.08315	0.00977			2.08315	0.02226	2.07803	0.00818	2.08486	0.000863223
	2.09181	0.00645	2.08889	0.0093	2.09102	0.00973			2.09121	0.0225	2.08594	0.00837	2.09363	0.000829879
	2.10022	0.00604	2.09803	0.00932	2.0989	0.01005			2.0997	0.02242	2.09372	0.00903	2.10265	0.000208422
	2.109	0.006	2.10689	0.0095	2.1066	0.01032			2.10856	0.02237	2.10175	0.00905	2.11161	0.000418526
	2.11822	0.00608	2.11522	0.00929	2.11437	0.00998			2.11783	0.02264	2.10992	0.00843	2.12024	0.000743698
	2.12736	0.00623	2.1231	0.00948	2.1224	0.00949			2.12707	0.0234	2.11827	0.00799	2.1284	0.00101
	2.13613	0.00578	2.13085	0.00979	2.1308	0.00927			2.13577	0.02307	2.12715	0.00805	2.13634	0.000795535
	2.14435	0.00559	2.1387	0.01022	2.13957	0.00912			2.14396	0.02274	2.13651	0.00836	2.14418	0.000668641
	2.15232	0.00586	2.14664	0.01043	2.14858	0.00923			2.15191	0.02294	2.14558	0.00797	2.15214	0.000963304
	2.16016	0.00581	2.15448	0.01021	2.15764	0.0095			2.1598	0.02324	2.154	0.00767	2.15996	0.00147
	2.16814	0.00622	2.16228	0.01038	2.16612	0.00927			2.16788	0.02388	2.16198	0.00779	2.16776	0.00166
	2.17604	0.00651	2.17056	0.01001	2.17432	0.00934			2.17587	0.02476	2.16992	0.00772	2.17601	0.00127
	2.18385	0.00743	2.17938	0.01011	2.1823	0.00982			2.18369	0.02552	2.17803	0.00769	2.18452	0.00128
	2.19185	0.00761	2.1886	0.01009	2.19028	0.00983			2.19175	0.02595	2.18583	0.00779	2.19329	0.00129
	2.20014	0.00745	2.19799	0.00988	2.19826	0.01066			2.20009	0.02585	2.19363	0.00829	2.20234	0.00075711
	2.20887	0.00698	2.20703	0.00979	2.20602	0.01168			2.20879	0.02552	2.20171	0.00854	2.21119	8.30369e-05
	2.21805	0.00748	2.21538	0.00949	2.21377	0.0117			2.21807	0.02608	2.21009	0.00831	2.21951	0.000809114
	2.22725	0.00817	2.2233	0.00892	2.22193	0.01161			2.22735	0.02638	2.21895	0.0079	2.2275	0.000650492
	2.23594	0.00783	2.23125	0.00867	2.23055	0.01141			2.23618	0.02618	2.228	0.00807	2.23552	0.000169544
	2.24406	0.0073	2.23927	0.0091	2.23965	0.01121			2.24433	0.02587	2.23689	0.00877	2.2435	6.06279e-06
	2.25194	0.00749	2.24734	0.0097	2.2491	0.01162			2.25219	0.02589	2.2454	0.00881	2.25154	6.52248e-05
	2.25977	0.0078	2.25522	0.01003	2.25828	0.01157			2.2601	0.02593	2.25344	0.00923	2.25947	0.000708212
	2.26775	0.00777	2.26309	0.0093	2.26687	0.01081			2.26814	0.02579	2.26127	0.0093	2.26724	0.00126
	2.27564	0.00804	2.2713	0.00883	2.2749	0.01038			2.27619	0.02598	2.2691	0.00983	2.27553	0.00115
	2.28332	0.00793	2.28011	0.00905	2.28288	0.01008			2.28401	0.0262	2.27704	0.0099	2.28432	0.000985876
	2.2912	0.00809	2.28937	0.00908	2.29092	0.01022			2.292	0.02646	2.28482	0.0095	2.29357	0.00109
	2.29937	0.00803	2.29875	0.00914	2.29901	0.01078			2.30036	0.02643	2.29273	0.0094	2.30302	0.00161
	2.30806	0.00745	2.30784	0.00946	2.3069	0.01138			2.30893	0.02625	2.30112	0.00973	2.31213	0.00218
	2.31722	0.00753	2.31625	0.00973	2.31468	0.01134			2.31773	0.02636	2.30971	0.00998	2.32051	0.00137
	2.32633	0.00774	2.32423	0.0098	2.3227	0.01116			2.32674	0.02669	2.31857	0.00952	2.32842	0.000749737
	2.33507	0.00746	2.33205	0.01013	2.33121	0.01076			2.33548	0.02654	2.3276	0.00925	2.33632	0.00114
	2.3433	0.00731	2.33995	0.01031	2.34029	0.01082			2.34365	0.02618	2.3363	0.00897	2.34422	0.000342367
	2.35134	0.00672	2.3479	0.01143	2.34976	0.01167			2.35147	0.02637	2.34453	0.00877	2.35227	0.000619843
	2.35923	0.00623	2.35578	0.01186	2.35896	0.01209			2.35929	0.02621	2.3526	0.0087	2.36015	0.00097936
	2.3672	0.00675	2.36363	0.01139	2.3675	0.01182			2.36743	0.02686	2.3606	0.00856	2.36795	0.000652773
	2.37513	0.0074	2.37175	0.01094	2.37552	0.01117			2.37555	0.02742	2.36855	0.009	2.37611	0.00103
	2.38298	0.00727	2.38023	0.01039	2.3834	0.01114			2.3834	0.02749	2.37658	0.00973	2.38485	0.000884623
	2.39104	0.00694	2.38933	0.01034	2.39138	0.01119			2.39145	0.02782	2.38435	0.01036	2.39415	0.00156
	2.39944	0.00698	2.39897	0.01072	2.39944	0.01181			2.39976	0.02783	2.3922	0.01027	2.40363	0.00202
	2.40803	0.00711	2.4082	0.01063	2.40741	0.01212			2.4085	0.02812	2.40065	0.00976	2.41278	0.0017
	2.41711	0.0071	2.41665	0.00967	2.41529	0.01244			2.41754	0.02826	2.40946	0.00966	2.42116	0.00288
	2.42617	0.00712	2.42451	0.0094	2.42329	0.01211			2.42648	0.02845	2.41875	0.00991	2.42903	0.00267
	2.43474	0.00737	2.43224	0.00869	2.43176	0.0113			2.43512	0.0281	2.42818	0.01025	2.43677	0.00405
	2.44273	0.00762	2.44016	0.00848	2.44086	0.01123			2.44329	0.029	2.43713	0.00998	2.44473	0.00249
	2.4506	0.00769	2.44801	0.00949	2.45025	0.01149			2.45123	0.02981	2.44534	0.00952	2.45281	0.0028
	2.4585	0.00742	2.45575	0.01063	2.45943	0.01189			2.45911	0.03012	2.45326	0.01007	2.4607	0.00182
	2.46653	0.00791	2.46355	0.01086	2.46801	0.01165			2.4671	0.03055	2.46115	0.01078	2.46853	0.00143
	2.47447	0.00868	2.47159	0.01063	2.47599	0.01147			2.47498	0.03109	2.46909	0.01107	2.47665	0.00108
	2.48229	0.0085	2.48001	0.01044	2.48377	0.01144			2.4828	0.03191	2.4772	0.01128	2.48521	0.000296246
	2.49043	0.00793	2.48901	0.01044	2.49168	0.01161			2.49094	0.03194	2.48496	0.01179	2.49434	0.000470475
	2.49911	0.00783	2.49837	0.0108	2.49975	0.01187			2.49945	0.03156	2.49273	0.01171	2.50391	0.00089755
	2.50818	0.00799	2.50754	0.01118	2.5077	0.01221			2.50826	0.03145	2.501	0.01092	2.51316	7.34878e-05
	2.51762	0.00796	2.51598	0.01194	2.51556	0.01248			2.51736	0.03237	2.5098	0.01018	2.52168	0.000467111
	2.52684	0.00794	2.52368	0.01221	2.52361	0.01172			2.52632	0.03247	2.51921	0.0103	2.52954	0.000550603
	2.5354	0.00731	2.53125	0.01215	2.53195	0.01127			2.53473	0.0315	2.52872	0.01126	2.53723	0.00156
	2.54342	0.00687	2.53905	0.01191	2.54077	0.01098			2.54269	0.03097	2.53771	0.0112	2.54502	0.00173
	2.55128	0.00693	2.54702	0.01265	2.54996	0.01141			2.55055	0.0317	2.54594	0.01036	2.55295	0.00191
	2.55913	0.0068	2.555	0.01342	2.55909	0.01153			2.55842	0.03212	2.55379	0.01013	2.56078	0.00251
	2.56713	0.00751	2.5631	0.01348	2.56769	0.01111			2.56646	0.03191	2.56166	0.01035	2.56863	0.00174
	2.57512	0.00848	2.5713	0.01301	2.57567	0.01105			2.57448	0.03209	2.56975	0.01057	2.5767	0.000809548
	2.58301	0.00865	2.57979	0.01244	2.5834	0.01114			2.58227	0.03251	2.57786	0.01113	2.58501	0.000408163
	2.59116	0.008	2.58867	0.01235	2.59116	0.01079			2.59042	0.03304	2.5857	0.01172	2.59388	0.000353608
	2.59983	0.00757	2.5978	0.01219	2.59917	0.01128			2.59908	0.03289	2.59357	0.01197	2.60335	0.00017096
	2.60897	0.00715	2.60685	0.0121	2.60708	0.01226			2.60812	0.03248	2.6018	0.0115	2.61274	0.000632428
	2.61847	0.00739	2.61532	0.01157	2.61483	0.01273			2.61767	0.03289	2.61042	0.01114	2.62129	0.00122
	2.62778	0.00786	2.62335	0.01161	2.62287	0.01281			2.62693	0.03392	2.61972	0.01099	2.62924	0.000961402
	2.63641	0.00761	2.63125	0.01178	2.63115	0.01253			2.63548	0.03338	2.62921	0.01148	2.63696	0.000499728
	2.64434	0.00742	2.63913	0.01139	2.64002	0.01235			2.64343	0.03318	2.63827	0.01114	2.64467	0.00085429
	2.65208	0.00695	2.64695	0.01137	2.6492	0.01288			2.65134	0.0335	2.6466	0.01074	2.65251	0.000791658
	2.65996	0.00713	2.6546	0.01196	2.65821	0.01316			2.65923	0.03418	2.6544	0.01089	2.6603	0.000860763
	2.66794	0.0078	2.6624	0.01244	2.66676	0.01272			2.66732	0.03504	2.6621	0.01105	2.66812	6.10027e-05
	2.67582	0.00852	2.67064	0.0125	2.67499	0.0132			2.67522	0.03568	2.66994	0.01118	2.67615	0.000301577
	2.68364	0.00866	2.67925	0.01257	2.68296	0.01309			2.68308	0.03552	2.6778	0.01152	2.68449	0.000422247
	2.69161	0.00877	2.68806	0.01268	2.69084	0.01323			2.69125	0.03527	2.68554	0.01219	2.69339	0.00115
	2.70012	0.00843	2.69708	0.01311	2.69879	0.01357			2.69987	0.03503	2.69337	0.01204	2.70262	0.00112
	2.70917	0.00775	2.70588	0.01327	2.70663	0.01389			2.70903	0.035	2.70152	0.01157	2.71178	0.000819638
	2.71864	0.0078	2.71415	0.01299	2.71451	0.01357			2.71851	0.03518	2.70998	0.01103	2.72042	0.000111318
	2.72788	0.00789	2.72225	0.01317	2.72275	0.01288			2.72776	0.03496	2.71902	0.01109	2.72846	0.000350439
	2.73657	0.00824	2.7304	0.01324	2.73122	0.01249			2.73631	0.03472	2.72848	0.01119	2.73634	0.000357831
	2.74476	0.00778	2.73847	0.01399	2.74003	0.01216			2.74428	0.0344	2.73774	0.01097	2.74423	2.213e-05
	2.75252	0.00716	2.74638	0.01498	2.74918	0.01225			2.75208	0.03446	2.74628	0.01046	2.75211	0.000279399
	2.76024	0.00711	2.75415	0.01506	2.75811	0.01208			2.75995	0.03396	2.75422	0.01044	2.75978	0.000747697
	2.7681	0.00787	2.76204	0.01459	2.76646	0.01184			2.76789	0.03456	2.76186	0.01059	2.76757	0.00111
	2.77589	0.0086	2.77037	0.01461	2.77437	0.01238			2.77579	0.03576	2.76946	0.01104	2.77581	0.00118
	2.78373	0.00903	2.77914	0.01497	2.78221	0.01257			2.78367	0.03626	2.77712	0.01163	2.78433	0.0014
	2.79182	0.00907	2.78842	0.01511	2.79011	0.01256			2.79182	0.03569	2.78487	0.01199	2.79315	0.0012
	2.80026	0.00895	2.79774	0.01509	2.79811	0.0132			2.80036	0.03584	2.79276	0.01208	2.80226	0.00105
	2.8091	0.00898	2.80656	0.01485	2.80601	0.01457			2.80938	0.03591	2.8011	0.01193	2.81113	0.000150599
	2.81843	0.00872	2.81482	0.01476	2.81396	0.0148			2.8188	0.03642	2.8098	0.0116	2.81953	0.000328249
	2.82774	0.00886	2.8229	0.01429	2.82221	0.01453			2.82798	0.03649	2.81898	0.01121	2.82766	6.51337e-05
	2.83642	0.00887	2.83104	0.01386	2.83093	0.01471			2.83657	0.03598	2.82825	0.01125	2.83567	0.000367918
	2.84446	0.00904	2.83922	0.0141	2.84005	0.01504			2.84461	0.03639	2.8372	0.01117	2.84368	0.000609379
	2.85227	0.00903	2.84724	0.01484	2.84942	0.01548			2.85231	0.03671	2.84558	0.01095	2.85159	0.000929191
	2.85998	0.00879	2.85502	0.01529	2.85851	0.0151			2.85998	0.03672	2.85352	0.01086	2.85926	0.000714384
	2.86777	0.0091	2.86284	0.01517	2.86693	0.01442			2.86785	0.03743	2.86142	0.0108	2.86703	0.000266872
	2.87542	0.00981	2.87113	0.01468	2.87498	0.0143			2.87565	0.03818	2.86938	0.0115	2.87541	0.000354386
	2.8831	0.01004	2.87995	0.01411	2.88281	0.01473			2.88352	0.03856	2.87708	0.01251	2.88422	0.000684507
	2.89112	0.00978	2.88933	0.01457	2.89066	0.01501			2.89157	0.03888	2.88465	0.01267	2.89346	0.000369556
	2.89944	0.00951	2.89868	0.01549	2.89869	0.01543			2.89996	0.03889	2.89248	0.01203	2.90272	9.29659e-05
	2.90822	0.00909	2.90752	0.01528	2.90657	0.01603			2.90892	0.03873	2.90076	0.01189	2.91153	0.000314478
	2.91749	0.00926	2.91573	0.01477	2.91452	0.01634			2.91833	0.03888	2.90936	0.01253	2.91983	0.000681588
	2.92673	0.00926	2.92366	0.01509	2.92277	0.01589			2.9277	0.03892	2.91849	0.01287	2.9279	0.00033255
	2.93542	0.00897	2.93162	0.01548	2.93156	0.01505			2.93637	0.03893	2.92785	0.01269	2.93594	0.000105456
	2.94356	0.00863	2.93974	0.01598	2.94091	0.01461			2.9445	0.03878	2.93664	0.01213	2.94412	0.000598436
	2.95147	0.00894	2.94775	0.01646	2.95043	0.01516			2.9523	0.03814	2.94478	0.01168	2.95224	0.00106
	2.95937	0.00904	2.95552	0.01682	2.95961	0.01595			2.96004	0.03865	2.95271	0.01139	2.96001	0.00137
	2.9672	0.00893	2.96335	0.01757	2.96797	0.01556			2.96784	0.0394	2.96059	0.01067	2.96782	0.00139
	2.97488	0.00922	2.97154	0.01737	2.97579	0.01493			2.97549	0.0402	2.96854	0.01035	2.97608	0.00124
	2.98256	0.00952	2.9803	0.01652	2.98363	0.01496			2.98315	0.04012	2.97661	0.01192	2.98491	0.00135
	2.99052	0.01003	2.98957	0.01662	2.99158	0.01558			2.99106	0.04003	2.98443	0.01281	2.9943	0.00159
	2.99899	0.00997	2.99891	0.01707	2.99962	0.01595			2.99943	0.0405	2.99234	0.01229	3.00365	0.00195
	3.00783	0.00982	3.00789	0.01734	3.00744	0.01619			3.0084	0.04087	3.00067	0.01166	3.01247	0.00145
	3.01703	0.00999	3.01614	0.01693	3.01528	0.01607			3.01766	0.04105	3.00935	0.0117	3.02072	0.000599414
	3.02602	0.01059	3.02399	0.0163	3.02348	0.016			3.02683	0.04108	3.01853	0.01184	3.02867	8.84605e-05
	3.0345	0.01024	3.03192	0.01608	3.03204	0.01613			3.03548	0.04171	3.02785	0.01209	3.03659	0.000107842
	3.04276	0.01012	3.03992	0.01644	3.04126	0.01578			3.04351	0.04233	3.03673	0.01193	3.0447	5.15058e-05
	3.0508	0.01069	3.04795	0.01674	3.05075	0.01568			3.05125	0.04247	3.04506	0.01152	3.05281	0.000545791
	3.05884	0.0109	3.05579	0.01669	3.05983	0.01613			3.05905	0.04261	3.05312	0.01222	3.06058	0.00097526
	3.06682	0.01139	3.06364	0.01631	3.0682	0.01636			3.06693	0.04352	3.061	0.01214	3.06842	0.00060417
	3.0746	0.01148	3.07192	0.0162	3.076	0.01583			3.07462	0.04477	3.06896	0.01243	3.0766	0.000527796
	3.08237	0.01126	3.08049	0.01643	3.08376	0.01522			3.08227	0.04517	3.07696	0.01286	3.08512	0.000292981
	3.09054	0.01088	3.08954	0.01606	3.09171	0.01563			3.0903	0.04512	3.08484	0.01278	3.09427	0.000604309
	3.0992	0.01106	3.09877	0.01615	3.09971	0.01707			3.09868	0.0449	3.09288	0.01291	3.10366	0.000925873
	3.10826	0.0108	3.10767	0.01604	3.10757	0.01779			3.10709	0.045	3.10137	0.01284	3.11264	0.000588386
	3.11768	0.01062	3.11594	0.01617	3.11546	0.01734			3.11589	0.04544	3.11024	0.01277	3.12094	0.000308099
	3.12679	0.01057	3.12379	0.01641	3.12355	0.01634			3.12511	0.04488	3.11949	0.01249	3.12874	0.000165991
	3.13521	0.00995	3.13158	0.0164	3.13195	0.01635			3.13429	0.04437	3.12856	0.01261	3.1365	9.522e-05
	3.14321	0.00987	3.13955	0.01694	3.14101	0.01613			3.14292	0.04459	3.13726	0.0123	3.14456	5.96039e-05
	3.15116	0.00952	3.14752	0.01797	3.15045	0.01549			3.15119	0.04537	3.14564	0.01189	3.15272	0.000606478
	3.15914	0.00939	3.15516	0.01869	3.15962	0.0154			3.15931	0.0458	3.1538	0.01136	3.16071	0.00109
	3.16725	0.00994	3.16297	0.01832	3.16813	0.0154			3.1672	0.04658	3.16188	0.01116	3.16869	0.00118
	3.17515	0.01029	3.17106	0.01766	3.17608	0.01546			3.1749	0.04673	3.16994	0.01183	3.17684	0.00069226
	3.18295	0.00987	3.17965	0.01753	3.18377	0.0151			3.18266	0.04702	3.17783	0.0121	3.1853	0.000159921
	3.19114	0.00959	3.18875	0.01836	3.19151	0.01514			3.19088	0.04753	3.18559	0.01194	3.19428	3.41529e-05
	3.1998	0.00969	3.19775	0.01855	3.19931	0.01588			3.19947	0.04759	3.19361	0.01155	3.2035	1.86464e-05
	3.20895	0.00952	3.20651	0.01819	3.20699	0.0172			3.20848	0.04773	3.202	0.01109	3.21246	3.01032e-05
	3.21828	0.01001	3.21487	0.01816	3.21477	0.01739			3.21778	0.04833	3.21084	0.01167	3.22085	8.27957e-05
	3.22727	0.01032	3.22288	0.01852	3.22276	0.01703			3.22673	0.0491	3.22002	0.01205	3.22878	0.000219952
	3.23567	0.01024	3.23081	0.01861	3.2312	0.01735			3.2351	0.04871	3.22915	0.012	3.23652	0.000138582
	3.24371	0.01025	3.23873	0.01816	3.24013	0.01775			3.24318	0.04841	3.23795	0.01184	3.24438	0.000432347
	3.25173	0.01072	3.24669	0.01862	3.24939	0.01778			3.25104	0.04803	3.24617	0.01189	3.25243	0.000729491
	3.2598	0.01134	3.25459	0.01895	3.25852	0.01747			3.25894	0.04877	3.25412	0.01221	3.26022	0.00114
	3.26794	0.01207	3.26259	0.01931	3.26711	0.01722			3.26695	0.05027	3.26205	0.01214	3.26811	0.000742341
	3.27588	0.01215	3.27093	0.01863	3.27514	0.01702			3.27476	0.05086	3.27006	0.01239	3.27622	0.000540627
	3.28373	0.0122	3.27953	0.01806	3.283	0.01711			3.28225	0.05055	3.27795	0.01262	3.28471	0.000598884
	3.2919	0.01193	3.28854	0.01842	3.29091	0.0169			3.29025	0.05011	3.28553	0.0133	3.29364	0.000240656
	3.30053	0.01154	3.29761	0.0191	3.29878	0.01715			3.29917	0.05035	3.29342	0.01264	3.30258	0.000394492
	3.30959	0.01135	3.30625	0.01889	3.30654	0.01765			3.30889	0.05078	3.30174	0.01189	3.31144	0.000615723
	3.31883	0.01186	3.31433	0.01877	3.31441	0.01754			3.31861	0.05085	3.31054	0.0118	3.31997	0.000627768
	3.32778	0.01205	3.32215	0.01914	3.32263	0.01731			3.32783	0.05082	3.31977	0.01219	3.32803	0.0003404
	3.33615	0.01136	3.33	0.01945	3.33096	0.01726			3.33625	0.05068	3.329	0.01248	3.33592	5.19738e-05
	3.34413	0.01102	3.33794	0.02027	3.33964	0.01692			3.34421	0.05069	3.33776	0.01148	3.34383	0.000438145
	3.35198	0.01074	3.34592	0.02075	3.34848	0.01683			3.35218	0.05033	3.34594	0.01018	3.35182	0.000239178
	3.35992	0.01096	3.35375	0.02093	3.35712	0.01655			3.36016	0.05013	3.35372	0.00995	3.35969	0.000558398
	3.36789	0.01117	3.36187	0.02095	3.36556	0.01586			3.36816	0.05074	3.36153	0.01071	3.36773	0.000595935
	3.37565	0.01218	3.37053	0.02104	3.37384	0.0159			3.37605	0.05207	3.36954	0.01128	3.3762	0.00117
	3.38345	0.01218	3.37958	0.02087	3.38199	0.01646			3.38396	0.05243	3.37734	0.01141	3.38491	0.00117
	3.39162	0.01201	3.38901	0.02108	3.39021	0.01663			3.39215	0.05196	3.38496	0.01134	3.39397	0.000982238
	3.40014	0.01148	3.39834	0.02125	3.39833	0.01713			3.40071	0.05189	3.39285	0.01162	3.40305	0.000894689
	3.40907	0.01141	3.40708	0.02112	3.40613	0.01734			3.40971	0.05234	3.40113	0.01161	3.41166	0.000470267
	3.41835	0.01163	3.41521	0.02128	3.4139	0.01754			3.41888	0.05337	3.40996	0.01095	3.41973	0.000263842
	3.42759	0.01168	3.42307	0.02137	3.42233	0.0176			3.42777	0.05411	3.41914	0.01056	3.42757	5.1632e-05
	3.43618	0.01143	3.43094	0.02102	3.43115	0.01778			3.43617	0.05364	3.42816	0.01166	3.43539	0.000249429
	3.44426	0.01186	3.43893	0.02158	3.44009	0.01805			3.4441	0.05376	3.4368	0.01237	3.44332	0.000166482
	3.45212	0.01196	3.44689	0.02258	3.4494	0.01888			3.45183	0.05467	3.44489	0.01167	3.45142	0.000894894
	3.45989	0.01166	3.45468	0.02267	3.45864	0.01894			3.45968	0.05503	3.45285	0.01102	3.45932	0.000971722
	3.46777	0.01234	3.46265	0.02203	3.46716	0.01825			3.4678	0.05555	3.46072	0.0116	3.46745	0.000954337
	3.47549	0.01269	3.47114	0.02135	3.47522	0.01828			3.47574	0.05571	3.46871	0.01284	3.47601	0.000853258
	3.48326	0.01336	3.48013	0.02132	3.48314	0.01819			3.48362	0.05588	3.47663	0.01325	3.48488	0.000943171
	3.49142	0.01289	3.48964	0.02238	3.49109	0.01838			3.49183	0.05615	3.48441	0.01271	3.49421	0.00054925
	3.49993	0.01225	3.49902	0.02222	3.49901	0.01881			3.50035	0.05597	3.49252	0.01216	3.50353	0.00105
	3.509	0.0123	3.50768	0.02157	3.50675	0.01927			3.50932	0.05511	3.50096	0.01277	3.51238	0.00135
	3.51811	0.01275	3.51575	0.02166	3.5147	0.01911			3.5186	0.05534	3.50968	0.01276	3.52051	0.00121
	3.52695	0.01254	3.5237	0.02225	3.52308	0.01901			3.52765	0.05557	3.51883	0.01224	3.52834	0.00131
	3.5353	0.01204	3.53171	0.0223	3.53194	0.01837			3.53607	0.05454	3.52789	0.01223	3.53608	0.00127
	3.54334	0.01206	3.53964	0.02274	3.54137	0.01838			3.54402	0.0536	3.5364	0.01153	3.54398	0.00183
	3.55119	0.01227	3.54756	0.02382	3.55069	0.01869			3.55177	0.05282	3.54452	0.01129	3.55202	0.00215
	3.55905	0.01247	3.55542	0.02476	3.55946	0.01862			3.55964	0.0527	3.55245	0.0107	3.55995	0.00223
	3.56705	0.01247	3.56342	0.02471	3.56765	0.01839			3.56767	0.0536	3.56039	0.00995	3.56803	0.00158
	3.57489	0.01272	3.57181	0.02345	3.57561	0.01829			3.57531	0.05369	3.56845	0.00966	3.5765	0.00125
	3.58271	0.01289	3.58076	0.02295	3.58351	0.01838			3.58311	0.05316	3.57648	0.01023	3.58534	0.00112
	3.59085	0.01264	3.59025	0.02355	3.59155	0.0186			3.59126	0.05333	3.58439	0.01033	3.59462	0.000730973
	3.59942	0.01226	3.59975	0.02433	3.59958	0.01932			3.59978	0.05358	3.59256	0.00949	3.60393	0.000808315
	3.60842	0.012	3.60865	0.02425	3.60736	0.01972			3.60879	0.05355	3.60117	0.00882	3.61279	0.000394112
	3.61757	0.01233	3.61677	0.02399	3.61529	0.0198			3.61783	0.05404	3.61011	0.00854	3.62094	0.00034535
	3.62641	0.01264	3.62453	0.02351	3.62358	0.01946			3.62647	0.05403	3.61951	0.0093	3.62875	0.000646079
	3.63469	0.0123	3.63219	0.02353	3.63223	0.01913			3.63466	0.05426	3.62878	0.00921	3.63663	0.00075609
	3.64264	0.01202	3.64001	0.02406	3.64149	0.01919			3.6428	0.05494	3.63727	0.00851	3.64456	0.000464761
	3.65057	0.01212	3.64786	0.02435	3.65087	0.01973			3.65082	0.05519	3.64514	0.00817	3.65248	0.00032585
	3.65852	0.01264	3.65568	0.0245	3.65975	0.02015			3.65887	0.05539	3.653	0.00923	3.66033	0.000677938
	3.66655	0.01343	3.66363	0.02472	3.66788	0.01956			3.66693	0.05621	3.66087	0.00993	3.66838	0.000623261
	3.67445	0.01357	3.67181	0.02446	3.67567	0.01958			3.67479	0.05722	3.66891	0.01025	3.67682	0.000707263
	3.68244	0.013	3.68042	0.02402	3.68337	0.01942			3.6827	0.05749	3.67688	0.01051	3.68582	0.000652892
	3.69082	0.01309	3.68963	0.02377	3.69132	0.01939			3.691	0.05754	3.68477	0.01101	3.69526	0.000806628
	3.6996	0.01345	3.699	0.02391	3.69942	0.02005			3.69947	0.05734	3.69291	0.01105	3.70459	0.00178
	3.70881	0.01338	3.70791	0.02423	3.70725	0.02016			3.70843	0.05778	3.70147	0.01044	3.7134	0.00202
	3.71815	0.01338	3.71604	0.02436	3.71515	0.01996			3.71764	0.05822	3.7106	0.00959	3.72158	0.00215
	3.72705	0.01358	3.72393	0.02413	3.72335	0.01965			3.7264	0.05833	3.72005	0.00979	3.72948	0.0019
	3.73531	0.01367	3.73177	0.02426	3.73187	0.0192			3.73465	0.05766	3.72932	0.01051	3.73723	0.00156
	3.74331	0.01356	3.7396	0.02547	3.74098	0.01875			3.74263	0.05758	3.73799	0.01008	3.74501	0.00193
	3.75112	0.01337	3.74735	0.02686	3.7503	0.01916			3.75057	0.05795	3.74602	0.00886	3.75267	0.00235
	3.75901	0.01358	3.75509	0.02752	3.75915	0.01905			3.75849	0.0578	3.75383	0.0082	3.76043	0.00217
	3.76713	0.01451	3.76296	0.02696	3.76743	0.01877			3.76661	0.0584	3.7617	0.00859	3.76846	0.00168
	3.77502	0.01461	3.77117	0.02692	3.77525	0.01898			3.77451	0.05924	3.76971	0.00892	3.77678	0.00156
	3.783	0.01461	3.77995	0.02739	3.78286	0.01856			3.7824	0.0593	3.77762	0.00943	3.78556	0.000913741
	3.79138	0.0139	3.78905	0.02779	3.79073	0.01895			3.79025	0.05926	3.78548	0.00955	3.79491	0.000320827
	3.80028	0.01361	3.79821	0.02762	3.79878	0.01973			3.79782	0.05858	3.79366	0.00923	3.80427	7.23561e-05
	3.80962	0.01412	3.807	0.02745	3.80666	0.02032			3.80654	0.05762	3.80205	0.00875	3.813	0.000794645
	3.81892	0.01425	3.81526	0.02777	3.8147	0.02075			3.81704	0.05771	3.81074	0.00845	3.82115	0.00124
	3.82784	0.01401	3.82323	0.02808	3.82292	0.02062			3.82702	0.05803	3.8201	0.00806	3.82909	0.0012
	3.83609	0.01363	3.83099	0.02777	3.83151	0.02045			3.83576	0.05753	3.82954	0.00821	3.83693	0.00112
	3.84396	0.0136	3.83888	0.0276	3.84058	0.02084			3.84397	0.05712	3.83839	0.0084	3.84489	0.000623448
	3.8519	0.01429	3.84651	0.02823	3.84973	0.02077			3.85172	0.05639	3.84657	0.00848	3.8526	0.000223116
	3.85989	0.01504	3.85403	0.0284	3.8586	0.02046			3.8595	0.05617	3.85441	0.0087	3.86014	0.000255037
	3.8679	0.01526	3.86216	0.02792	3.86705	0.02028			3.8674	0.05714	3.86219	0.00876	3.86784	1.31912e-05
	3.87579	0.01586	3.87082	0.02711	3.875	0.02061			3.87514	0.0573	3.86977	0.00842	3.87601	0.000445114
	3.88361	0.01582	3.87963	0.0271	3.8828	0.02077			3.88306	0.05712	3.87743	0.0093	3.88473	0.000983154
	3.89188	0.01512	3.88878	0.02736	3.89068	0.02049			3.89152	0.05741	3.88521	0.00974	3.89388	0.000550958
	3.90066	0.01466	3.89799	0.02771	3.8986	0.02033			3.90045	0.05735	3.89291	0.00924	3.90325	0.000324017
	3.91001	0.01494	3.90656	0.02694	3.90641	0.02049			3.90987	0.05717	3.90145	0.00865	3.91215	5.6982e-05
	3.91936	0.01527	3.91463	0.02695	3.91447	0.02045			3.91929	0.05758	3.91069	0.00855	3.92037	0.000324987
	3.92819	0.01529	3.92264	0.02722	3.92286	0.01977			3.92815	0.05779	3.92028	0.00864	3.92829	0.000150717
	3.93637	0.01501	3.93061	0.02759	3.93142	0.02003			3.93637	0.05795	3.92965	0.00863	3.9362	0.000376823
	3.94419	0.01441	3.93859	0.02805	3.94042	0.02			3.9441	0.05835	3.93833	0.0077	3.94415	0.000497788
	3.952	0.01399	3.94633	0.02871	3.9495	0.02065			3.95142	0.05759	3.94646	0.00638	3.95183	0.000800479
	3.95995	0.01442	3.95409	0.02931	3.95814	0.02024			3.95836	0.05713	3.95433	0.00696	3.95937	0.00131
	3.96787	0.01518	3.96226	0.02913	3.9662	0.01972			3.96561	0.05766	3.96197	0.00724	3.96726	0.00197
	3.97563	0.0155	3.97093	0.0293	3.97413	0.02011			3.97334	0.05774	3.96964	0.00709	3.97553	0.00222
	3.9835	0.01478	3.97992	0.02916	3.98209	0.02074			3.98243	0.05796	3.97718	0.00724	3.98418	0.0018
	3.99163	0.01463	3.98926	0.02973	3.99002	0.02133			3.99191	0.05744	3.98467	0.00791	3.99329	0.00192
	4.00025	0.01481	3.99837	0.02987	3.99795	0.02178			4.00133	0.05682	3.99269	0.00836	4.00244	0.00188
	4.00943	0.0152	4.00684	0.02968	4.00573	0.02223			4.011	0.05661	4.00121	0.00789	4.01109	0.00105
	4.01899	0.01512	4.01487	0.02976	4.0138	0.02191			4.02047	0.05685	4.01016	0.0073	4.01938	0.000445785
	4.02812	0.01531	4.02296	0.0298	4.02247	0.02189			4.02927	0.05567	4.01941	0.00729	4.02744	0.00027091
	4.03641	0.01579	4.03095	0.03004	4.03144	0.02157			4.03739	0.05578	4.02858	0.00808	4.03542	2.97818e-07
	4.0442	0.01568	4.03895	0.03073	4.04076	0.02184			4.04506	0.05626	4.03731	0.00774	4.0434	0.000249462
	4.05189	0.01545	4.04681	0.03129	4.04998	0.02198			4.05266	0.0566	4.04545	0.00716	4.05124	0.000556226
	4.05968	0.01563	4.05455	0.03095	4.05865	0.02169			4.06049	0.05705	4.05338	0.00739	4.05901	0.000292105
	4.06747	0.01682	4.06261	0.03036	4.06676	0.0212			4.0683	0.05717	4.06131	0.00783	4.06711	5.73139e-05
	4.07522	0.01769	4.07121	0.03023	4.0747	0.02095			4.07606	0.05779	4.06924	0.00866	4.07569	0.000253462
	4.08309	0.0178	4.08042	0.03032	4.0826	0.02103			4.08389	0.05743	4.07686	0.00897	4.08464	0.000291851
	4.09118	0.01718	4.08989	0.03106	4.09061	0.02113			4.09202	0.05674	4.08444	0.00899	4.09392	2.05055e-06
	4.09979	0.01677	4.09904	0.03116	4.09861	0.02198			4.10066	0.05683	4.09241	0.00878	4.10311	0.000228873
	4.10881	0.0172	4.10733	0.0308	4.10639	0.02206			4.10978	0.05745	4.10083	0.00882	4.11177	6.08e-05
	4.11806	0.01725	4.1151	0.02997	4.11434	0.02119			4.11917	0.0572	4.10961	0.00907	4.11994	0.000303265
	4.12706	0.01646	4.12285	0.0301	4.1229	0.02015			4.12781	0.05697	4.11875	0.00904	4.12792	0.000727947
	4.13543	0.01611	4.13122	0.03041	4.132	0.01975			4.13518	0.05622	4.12782	0.00867	4.13593	0.000672065
	4.14329	0.01627	4.13976	0.03131	4.14157	0.01959			4.14278	0.05559	4.1362	0.00826	4.14396	0.00113
	4.15117	0.01642	4.14797	0.03257	4.1509	0.01936			4.15134	0.05527	4.14413	0.00816	4.15185	0.00169
	4.15913	0.01647	4.15583	0.03329	4.15956	0.01885			4.15996	0.055	4.15208	0.0078	4.15971	0.00184
	4.16698	0.01644	4.16385	0.03339	4.16752	0.01841			4.16819	0.05572	4.16014	0.00712	4.16792	0.0021
	4.17469	0.01669	4.17215	0.03287	4.17534	0.01838			4.17605	0.05613	4.16817	0.00742	4.17648	0.00171
	4.18258	0.01701	4.18099	0.03316	4.18329	0.01842			4.18385	0.05461	4.17595	0.00826	4.18555	0.00145
	4.19083	0.01653	4.19034	0.03344	4.19133	0.01851			4.19195	0.05364	4.18365	0.00828	4.19486	0.00167
	4.19937	0.016	4.19953	0.03417	4.19923	0.01952			4.20051	0.05344	4.19182	0.00762	4.20402	0.00176
	4.20831	0.01625	4.20809	0.0336	4.20709	0.0203			4.20952	0.05375	4.20053	0.00741	4.21263	0.000853007
	4.21742	0.01697	4.21595	0.03351	4.21506	0.02025			4.21865	0.05323	4.20965	0.00778	4.22073	0.00039197
	4.22608	0.01685	4.22375	0.03368	4.22347	0.01964			4.22743	0.05273	4.21905	0.00812	4.22864	0.000436259
	4.2343	0.01645	4.23169	0.0334	4.23247	0.01938			4.23561	0.05245	4.22816	0.00795	4.23658	0.000550618
	4.24244	0.01622	4.23981	0.03354	4.24192	0.02002			4.24348	0.05267	4.23656	0.00742	4.24465	0.00126
	4.25061	0.01692	4.24778	0.03384	4.25129	0.02075			4.25127	0.05226	4.24465	0.00768	4.25261	0.00108
	4.25869	0.01785	4.25559	0.0347	4.26003	0.02073			4.25914	0.05199	4.25268	0.00839	4.26049	0.00108
	4.26664	0.01838	4.26364	0.03382	4.26805	0.02004			4.2669	0.05275	4.26079	0.00864	4.26862	0.000793534
	4.27441	0.0183	4.27151	0.03311	4.27572	0.01989			4.27458	0.05295	4.2689	0.00938	4.27705	0.000313542
	4.28242	0.01812	4.27959	0.03266	4.28353	0.01987			4.28255	0.05297	4.27684	0.00957	4.28596	0.000109054
	4.291	0.01838	4.28867	0.03292	4.29153	0.02007			4.29084	0.05167	4.28467	0.00941	4.29519	0.000167207
	4.29994	0.01811	4.29843	0.03337	4.2994	0.02023			4.29943	0.05166	4.29291	0.009	4.30423	0.0011
	4.30918	0.01818	4.3078	0.03307	4.30724	0.02026			4.30812	0.05178	4.30157	0.00898	4.31277	0.000764439
	4.31835	0.01841	4.31623	0.03339	4.3152	0.01993			4.31708	0.05151	4.3107	0.00872	4.3208	0.000763912
	4.32703	0.01841	4.32405	0.03318	4.32351	0.01928			4.32599	0.05057	4.32005	0.00861	4.32867	0.000230555
	4.33519	0.01815	4.33176	0.03318	4.33227	0.01884			4.33444	0.04975	4.32907	0.00862	4.3366	0.0001236
	4.34316	0.01775	4.33967	0.03321	4.34147	0.01837			4.34259	0.04995	4.33745	0.00818	4.34475	0.000863408
	4.35111	0.01741	4.34736	0.034	4.35077	0.01837			4.35065	0.05026	4.34543	0.00758	4.35287	0.00127
	4.35909	0.01795	4.35508	0.03488	4.35957	0.01856			4.35869	0.05043	4.35334	0.00714	4.36069	0.00168
	4.367	0.01872	4.36318	0.03535	4.36763	0.01842			4.36654	0.05031	4.36141	0.00768	4.36874	0.00132
	4.37476	0.01875	4.3715	0.0358	4.37535	0.01785			4.37425	0.05043	4.36949	0.00857	4.37702	0.000986448
	4.38268	0.01823	4.38031	0.03561	4.3831	0.01778			4.38225	0.05021	4.37734	0.0094	4.38586	0.00047496
	4.39109	0.01797	4.38943	0.03556	4.39097	0.01847			4.39073	0.05008	4.38516	0.00919	4.39506	0.000756436
	4.40003	0.01793	4.39841	0.03527	4.39877	0.01972			4.39958	0.04972	4.39331	0.0089	4.40415	0.000526414
	4.40939	0.01843	4.40701	0.03525	4.40658	0.02017			4.40883	0.0495	4.40189	0.00911	4.41271	7.88723e-05
	4.41867	0.0189	4.41523	0.03557	4.41451	0.01979			4.41803	0.04999	4.41097	0.00937	4.42076	0.000340879
	4.4274	0.01862	4.42315	0.03629	4.42277	0.01972			4.42671	0.05023	4.42032	0.00933	4.42864	0.000170157
	4.43559	0.0185	4.43091	0.03685	4.43143	0.01995			4.43498	0.04956	4.42939	0.00947	4.43658	0.000403274
	4.44361	0.01864	4.43832	0.03691	4.44059	0.02006			4.44314	0.04892	4.43783	0.00938	4.44455	4.50631e-05
	4.45165	0.01894	4.44551	0.03711	4.44989	0.01988			4.45119	0.04926	4.44574	0.00911	4.45228	0.00086349
	4.45974	0.01944	4.4531	0.03694	4.45875	0.01993			4.4592	0.05016	4.45361	0.00887	4.45999	0.00154
	4.46776	0.02005	4.46181	0.03678	4.46699	0.02044			4.467	0.05107	4.46161	0.0086	4.46801	0.00119
	4.47563	0.02054	4.47116	0.03659	4.47487	0.02078			4.47469	0.05075	4.4698	0.00941	4.47638	0.000440882
	4.48361	0.02063	4.48043	0.03697	4.48265	0.02021			4.48275	0.05027	4.47771	0.01038	4.48524	0.00032856
	4.49199	0.01981	4.48968	0.03697	4.49055	0.02011			4.49133	0.05068	4.48549	0.01028	4.49433	0.000596719
	4.50081	0.01888	4.49864	0.03658	4.49835	0.02068			4.50037	0.05146	4.4936	0.00951	4.50329	0.00059759
	4.51001	0.01923	4.50701	0.03554	4.50606	0.02092			4.50973	0.05126	4.50208	0.00895	4.51182	0.000380697
	4.51916	0.01982	4.51492	0.0354	4.51407	0.02016			4.51889	0.05135	4.51095	0.00903	4.51983	0.000452749
	4.52781	0.01981	4.52277	0.03604	4.52251	0.01918			4.52748	0.05138	4.52013	0.00927	4.52773	0.00088951
	4.53588	0.01962	4.53067	0.03641	4.53123	0.01899			4.53552	0.05131	4.5291	0.00933	4.53565	0.000736345
	4.54377	0.01948	4.53863	0.0368	4.54029	0.01925			4.54346	0.0513	4.53752	0.00877	4.54369	0.000877495
	4.55172	0.0196	4.54638	0.03743	4.54938	0.01902			4.55146	0.05059	4.54543	0.00893	4.55162	0.00116
	4.55992	0.01986	4.55421	0.03784	4.55793	0.01811			4.55971	0.05121	4.55321	0.00867	4.5593	0.0011
	4.56795	0.0199	4.56254	0.03734	4.56606	0.01785			4.56776	0.05231	4.56108	0.00817	4.56741	0.000773107
	4.57576	0.01998	4.57135	0.03765	4.57413	0.01838			4.57552	0.05302	4.56912	0.00821	4.57595	0.000516175
	4.58367	0.01971	4.58063	0.03789	4.58212	0.01857			4.5834	0.05242	4.5769	0.0082	4.58491	0.000613388
	4.59187	0.01942	4.59005	0.03842	4.5901	0.01911			4.5917	0.05207	4.58471	0.00861	4.59417	0.000774186
	4.60053	0.01914	4.59908	0.03832	4.5978	0.01919			4.60052	0.05244	4.59283	0.00813	4.60309	0.00106
	4.6097	0.01921	4.6074	0.03775	4.60548	0.01935			4.60984	0.05293	4.60126	0.00774	4.61148	0.000181958
	4.61894	0.01958	4.61523	0.03756	4.61366	0.01935			4.61908	0.05341	4.61019	0.00741	4.61942	0.000450125
	4.62772	0.01963	4.62307	0.03746	4.62236	0.01935			4.62776	0.05337	4.6192	0.0077	4.62726	5.69018e-05
	4.63586	0.01968	4.63093	0.03761	4.63144	0.01921			4.63576	0.05347	4.62814	0.00751	4.63514	4.30132e-05
	4.64362	0.01992	4.63894	0.03772	4.6408	0.0193			4.64359	0.05373	4.63663	0.00686	4.64323	0.000873175
	4.65133	0.01996	4.64675	0.038	4.64988	0.01992			4.65148	0.05445	4.64463	0.00711	4.65125	0.00142
	4.65932	0.02054	4.65462	0.0374	4.65834	0.01987			4.65968	0.0548	4.65255	0.00747	4.65918	0.00132
	4.66729	0.02145	4.66286	0.03636	4.6664	0.0196			4.66781	0.05531	4.66049	0.00803	4.66751	0.000601141
	4.67508	0.02206	4.67164	0.03515	4.67451	0.01916			4.67555	0.05572	4.66846	0.00849	4.67624	0.000421071
	4.68305	0.02226	4.68093	0.03472	4.68265	0.01953			4.68345	0.05621	4.67628	0.0087	4.6853	0.000257358
	4.6913	0.02177	4.69034	0.03449	4.6907	0.02079			4.69172	0.05654	4.68425	0.00854	4.69469	0.000676289
	4.69997	0.02175	4.69933	0.03397	4.69853	0.02138			4.70037	0.05582	4.69263	0.00845	4.7038	0.000477097
	4.70903	0.02248	4.7077	0.03328	4.70632	0.02102			4.70953	0.05554	4.70127	0.00857	4.71217	0.00011576
	4.71803	0.02303	4.7156	0.03221	4.71434	0.02049			4.71872	0.05629	4.71028	0.00843	4.72007	0.000225623
	4.72673	0.02259	4.72344	0.0317	4.72287	0.02095			4.72743	0.05643	4.71935	0.00869	4.72779	0.000501384
	4.73489	0.02259	4.73145	0.03105	4.73197	0.02077			4.73559	0.05612	4.72806	0.00881	4.73552	0.00023851
	4.74282	0.02263	4.73945	0.03133	4.74142	0.02033			4.74345	0.0555	4.73633	0.00797	4.74359	0.000847568
	4.75067	0.02269	4.74728	0.03172	4.75051	0.01971			4.75122	0.05537	4.74423	0.00804	4.75145	0.00144
	4.75864	0.02263	4.75509	0.03164	4.75898	0.01952			4.75918	0.05599	4.75209	0.00767	4.75934	0.00155
	4.76666	0.02237	4.76326	0.03157	4.767	0.01959			4.76712	0.05588	4.75999	0.00764	4.76765	0.00128
	4.77455	0.02266	4.77192	0.03151	4.77485	0.019			4.77491	0.05565	4.76807	0.00848	4.77638	0.000782822
	4.78266	0.02248	4.78126	0.03108	4.7829	0.01894			4.78296	0.05549	4.77593	0.00866	4.78564	0.000414003
	4.7911	0.02171	4.79084	0.03117	4.79104	0.01946			4.79126	0.05549	4.78386	0.00818	4.79515	0.00109
	4.79971	0.02108	4.79994	0.03102	4.79892	0.02058			4.79998	0.0554	4.79226	0.00774	4.80439	0.00112
	4.80871	0.02113	4.80835	0.03106	4.80677	0.0207			4.80903	0.05492	4.80104	0.00776	4.81291	0.000219143
	4.81768	0.02167	4.81626	0.03127	4.81487	0.01961			4.81807	0.05438	4.81036	0.00773	4.82086	5.66859e-05
	4.82623	0.02139	4.824	0.03098	4.82336	0.01851			4.82674	0.05431	4.81983	0.00828	4.82854	0.000211158
	4.83435	0.02117	4.83183	0.03103	4.83243	0.01857			4.83488	0.05429	4.8288	0.00865	4.83637	1.41189e-05
	4.84225	0.02112	4.83976	0.03146	4.8418	0.01907			4.84274	0.05437	4.83701	0.00842	4.84439	0.000736471
	4.85013	0.02164	4.84761	0.03212	4.85098	0.01943			4.85057	0.05432	4.84493	0.0085	4.85228	0.00103
	4.85809	0.02223	4.85544	0.03185	4.8595	0.01896			4.85857	0.0546	4.85278	0.00847	4.86015	0.00115
	4.86599	0.02274	4.8635	0.03147	4.8674	0.01848			4.86655	0.05504	4.86067	0.0087	4.8684	0.001
	4.8738	0.02307	4.87189	0.031	4.87521	0.0185			4.87434	0.05535	4.86879	0.00957	4.87705	0.000602351
	4.88191	0.02308	4.88085	0.03091	4.88318	0.0184			4.88252	0.05525	4.8767	0.00977	4.88627	0.000184025
	4.89062	0.0233	4.89031	0.03092	4.8914	0.01836			4.89106	0.05545	4.88464	0.0094	4.89569	0.000209733
	4.89984	0.02327	4.89958	0.03091	4.89943	0.01896			4.89984	0.05566	4.89297	0.00885	4.90482	0.000437911
	4.90934	0.02342	4.9081	0.03082	4.90726	0.01948			4.9089	0.0561	4.90186	0.00882	4.91333	0.000947304
	4.91848	0.02323	4.91597	0.03077	4.91528	0.01953			4.91782	0.05655	4.91126	0.00808	4.92129	0.00116
	4.92693	0.02328	4.92366	0.03097	4.92359	0.019			4.92623	0.05615	4.9207	0.00827	4.92898	0.000773152
	4.93489	0.02342	4.93138	0.03049	4.93239	0.01844			4.93423	0.05598	4.92967	0.00847	4.93665	0.00122
	4.94271	0.02324	4.93921	0.03085	4.94164	0.01862			4.94222	0.05612	4.93787	0.00798	4.94447	0.00205
	4.95061	0.02304	4.94698	0.03141	4.95081	0.01931			4.9501	0.0564	4.94571	0.00749	4.95224	0.00308
	4.95869	0.0235	4.95476	0.03165	4.9594	0.01911			4.9581	0.05694	4.95355	0.00693	4.96008	0.00277
	4.9667	0.02412	4.96279	0.0317	4.96734	0.01833			4.96607	0.05693	4.96149	0.00745	4.96822	0.00199
	4.97457	0.0239	4.97119	0.03137	4.97516	0.01774			4.97389	0.05661	4.96943	0.0085	4.97674	0.00205
	4.98268	0.02318	4.98007	0.03153	4.98301	0.01777			4.98217	0.05604	4.97726	0.00912	4.98573	0.00214
	4.9913	0.02261	4.98928	0.03156	4.99106	0.01873			4.99098	0.05566	4.98515	0.00844	4.99516	0.00192
	5.00056	0.02253	4.99842	0.03191	4.99889	0.01876			5.0001	0.055	4.99347	0.00822	5.00435	0.00114
	5.01014	0.02257	5.00703	0.03189	5.00676	0.01873			5.0095	0.05484	5.00223	0.0081	5.01285	0.000898051
	5.01941	0.02214	5.01508	0.03192	5.01484	0.01851			5.01862	0.05493	5.01151	0.00792	5.02079	0.000563853
	5.02794	0.02162	5.02296	0.03178	5.02318	0.01867			5.02706	0.05459	5.02092	0.00788	5.02858	3.33883e-05
	5.03584	0.02147	5.03083	0.03208	5.03207	0.01846			5.03495	0.05465	5.02984	0.0078	5.03637	0.000514471
	5.04362	0.0219	5.03872	0.03271	5.04114	0.01846			5.04279	0.05447	5.03818	0.00781	5.04418	0.000282938
	5.05153	0.02226	5.0464	0.03296	5.05008	0.01907			5.05068	0.05476	5.04605	0.00819	5.05189	0.000785312
	5.05959	0.02272	5.05422	0.03276	5.05855	0.01909			5.05879	0.05536	5.0537	0.00788	5.0596	0.000781941
	5.06751	0.02358	5.06222	0.03243	5.06659	0.0198			5.06673	0.05602	5.06145	0.00769	5.06767	8.34246e-05
	5.07532	0.02411	5.0704	0.03255	5.07445	0.01972			5.07456	0.05604	5.06926	0.00859	5.07619	0.000442289
	5.0834	0.02425	5.07915	0.03247	5.08225	0.01973			5.0827	0.05547	5.07704	0.00956	5.08519	0.000330113
	5.09189	0.02411	5.08833	0.03217	5.09015	0.02002			5.09132	0.0547	5.08499	0.00955	5.09437	0.000175762
	5.10098	0.02406	5.09722	0.03163	5.09804	0.02059			5.10054	0.05452	5.09331	0.0093	5.10347	0.000289892
	5.11051	0.0247	5.10561	0.03192	5.10601	0.0207			5.11011	0.05513	5.10195	0.00876	5.11199	3.32462e-05
	5.11978	0.02537	5.1138	0.03188	5.11437	0.02002			5.11943	0.05527	5.11108	0.00909	5.12006	0.000258157
	5.12838	0.02523	5.12207	0.03136	5.12298	0.01976			5.128	0.05465	5.12054	0.00942	5.12794	0.000360777
	5.13642	0.02501	5.13051	0.03153	5.13196	0.01934			5.1359	0.05425	5.12965	0.00885	5.13583	0.000864994
	5.14416	0.02493	5.13859	0.0326	5.14107	0.02015			5.14372	0.05449	5.13802	0.0077	5.14368	0.00154
	5.1519	0.02501	5.14628	0.03311	5.14987	0.01979			5.15159	0.05448	5.14596	0.00762	5.15139	0.00194
	5.15974	0.02577	5.15408	0.0328	5.15817	0.01875			5.15953	0.05454	5.15361	0.00773	5.15916	0.00178
	5.16754	0.02634	5.16238	0.0324	5.16609	0.01874			5.16733	0.05475	5.16135	0.00756	5.16728	0.00206
	5.17529	0.02614	5.17118	0.03293	5.17401	0.01951			5.17516	0.05544	5.16909	0.00739	5.17573	0.00149
	5.18329	0.02578	5.18037	0.03357	5.1819	0.01951			5.18331	0.0551	5.17674	0.0075	5.18459	0.000989028
	5.19169	0.0258	5.18962	0.0337	5.18987	0.01926			5.19179	0.05417	5.18451	0.0079	5.19373	0.000785571
	5.20056	0.02517	5.19842	0.0338	5.19769	0.01958			5.2009	0.05358	5.19268	0.00778	5.20262	0.000959381
	5.20996	0.02477	5.20675	0.03399	5.20559	0.01957			5.21049	0.05457	5.20135	0.00696	5.21102	0.000535202
	5.21934	0.02473	5.21491	0.03412	5.21403	0.01955			5.21981	0.05502	5.2105	0.00667	5.21915	0.000235361
	5.228	0.02508	5.223	0.03416	5.22288	0.01908			5.22847	0.05462	5.2198	0.00733	5.22715	0.000649145
	5.236	0.02511	5.23099	0.03426	5.23211	0.01852			5.23648	0.05414	5.22879	0.00739	5.23517	0.000157463
	5.24382	0.02484	5.23891	0.03483	5.24148	0.01919			5.24422	0.05428	5.23713	0.00699	5.2431	0.000896359
	5.25158	0.02503	5.24665	0.03528	5.25045	0.01999			5.25197	0.05494	5.24505	0.0067	5.25084	0.000910492
	5.25942	0.02562	5.25449	0.03478	5.25874	0.0195			5.25978	0.05542	5.25287	0.00731	5.25865	0.000383921
	5.26713	0.02638	5.26285	0.03435	5.26663	0.01942			5.26753	0.0559	5.26078	0.00788	5.26711	0.000228671
	5.27482	0.02638	5.27168	0.03411	5.27445	0.01969			5.27528	0.05667	5.26857	0.00875	5.27597	0.000371808
	5.28278	0.02609	5.28104	0.03426	5.28235	0.02025			5.28329	0.05723	5.27617	0.00885	5.28516	0.000225338
	5.29114	0.02572	5.29033	0.03441	5.29037	0.02114			5.29168	0.05649	5.28398	0.00899	5.29447	6.48817e-05
	5.30003	0.02599	5.29907	0.03444	5.29821	0.02126			5.30061	0.05612	5.29226	0.00929	5.30337	0.000186245
	5.30923	0.02626	5.30734	0.03419	5.30619	0.02098			5.30996	0.056	5.30087	0.00944	5.31165	0.000111824
	5.31841	0.02614	5.31537	0.03393	5.31453	0.0209			5.31926	0.05652	5.30988	0.00981	5.3197	0.000267476
	5.32711	0.02597	5.32339	0.03394	5.32338	0.02108			5.32791	0.05646	5.31914	0.00973	5.32771	0.000169501
	5.33525	0.02586	5.3315	0.0342	5.33268	0.02074			5.33589	0.0562	5.32785	0.00912	5.33574	0.000256486
	5.34321	0.02615	5.33957	0.03527	5.34214	0.02066			5.34367	0.05625	5.33616	0.00904	5.3438	0.00108
	5.35112	0.02641	5.34739	0.0356	5.35124	0.02038			5.35148	0.05679	5.34425	0.00905	5.35155	0.0013
	5.35904	0.02656	5.35522	0.03558	5.35962	0.02001			5.35932	0.05712	5.3523	0.00841	5.35941	0.00157
	5.36678	0.02717	5.3634	0.0355	5.36745	0.01978			5.36704	0.05739	5.36039	0.0083	5.36767	0.00123
	5.37443	0.02769	5.3721	0.03588	5.3752	0.0196			5.37478	0.05763	5.36824	0.00882	5.37646	0.00113
	5.3824	0.02761	5.38132	0.03623	5.38316	0.01927			5.38275	0.05766	5.37594	0.00914	5.38577	0.00107
	5.39079	0.0271	5.3906	0.03681	5.39115	0.01991			5.39112	0.05749	5.3839	0.00843	5.39513	0.00138
	5.39959	0.02715	5.39943	0.03782	5.3991	0.0209			5.39996	0.05757	5.39234	0.00745	5.40401	0.00128
	5.40878	0.02742	5.40761	0.03791	5.40709	0.02074			5.40918	0.05743	5.40116	0.00742	5.41226	0.000286149
	5.41775	0.0281	5.41545	0.0378	5.41534	0.02025			5.41834	0.057	5.41041	0.00803	5.42031	1.0761e-05
	5.426	0.02804	5.42337	0.03759	5.424	0.01964			5.42696	0.05645	5.41968	0.00807	5.4284	0.000117766
	5.43375	0.02756	5.43141	0.03826	5.43327	0.01983			5.43503	0.05601	5.42843	0.007	5.43649	0.000615562
	5.44147	0.02764	5.43957	0.03921	5.44281	0.02032			5.44286	0.05619	5.43656	0.00679	5.44453	0.000678589
	5.44945	0.02766	5.44751	0.03977	5.45196	0.02043			5.45071	0.05584	5.44446	0.00749	5.45236	0.00106
	5.45765	0.02824	5.45533	0.03966	5.46033	0.02006			5.45864	0.05603	5.45238	0.00804	5.46033	0.00131
	5.46583	0.02844	5.46346	0.03886	5.46809	0.02098			5.46638	0.05672	5.46047	0.00795	5.46856	0.000964352
	5.47405	0.02831	5.47199	0.03861	5.47569	0.02156			5.47413	0.05718	5.46855	0.00859	5.47726	0.000630802
	5.4824	0.02838	5.48103	0.03813	5.48347	0.02172			5.48224	0.057	5.47632	0.00918	5.48645	5.85858e-05
	5.49113	0.02856	5.49029	0.03843	5.49128	0.02256			5.49078	0.05675	5.48432	0.00907	5.49566	0.000857286
	5.50026	0.02824	5.49921	0.03859	5.49901	0.02297			5.49961	0.05708	5.49273	0.00876	5.50454	0.00134
	5.50959	0.02805	5.50751	0.03839	5.50693	0.02289			5.50876	0.05737	5.50173	0.00806	5.51277	0.000668963
	5.5185	0.02852	5.51538	0.03887	5.51511	0.02234			5.51768	0.05706	5.5113	0.00873	5.52065	0.00045875
	5.52682	0.02867	5.52322	0.03877	5.52359	0.02149			5.52611	0.05593	5.52072	0.00941	5.52854	0.000204754
	5.53482	0.02878	5.53121	0.03922	5.5326	0.0212			5.53439	0.05569	5.52943	0.00894	5.53658	0.000503597
	5.54283	0.02857	5.5392	0.0398	5.54204	0.02143			5.54245	0.05583	5.53757	0.00813	5.54469	0.00126
	5.55083	0.0289	5.54698	0.04084	5.55125	0.02126			5.55043	0.05547	5.54555	0.00814	5.5525	0.0018
	5.55876	0.02964	5.55491	0.04084	5.5597	0.0208			5.55833	0.05534	5.55356	0.00845	5.56039	0.00173
	5.56657	0.0301	5.56307	0.04071	5.56763	0.02071			5.56601	0.05492	5.5616	0.00886	5.56862	0.00169
	5.5744	0.03003	5.5717	0.0408	5.5753	0.02			5.57372	0.05441	5.56954	0.00913	5.57715	0.0016
	5.58265	0.02979	5.58076	0.04167	5.58305	0.0201			5.582	0.05388	5.57732	0.00877	5.58614	0.00149
	5.59135	0.02991	5.58976	0.04255	5.59079	0.02097			5.59078	0.05287	5.58534	0.00874	5.59525	0.00172
	5.60052	0.02991	5.59847	0.04236	5.59845	0.02183			5.59996	0.05241	5.59369	0.00829	5.60407	0.00147
	5.60989	0.03003	5.60671	0.04236	5.60627	0.02236			5.60929	0.05237	5.60247	0.00773	5.61231	0.00166
	5.61891	0.02993	5.6146	0.04277	5.61438	0.02216			5.61827	0.05186	5.61167	0.00756	5.62021	0.00191
	5.62724	0.02924	5.62248	0.04305	5.6229	0.02195			5.62666	0.05109	5.62082	0.00766	5.62798	0.00136
	5.63531	0.02884	5.6304	0.04297	5.63189	0.02201			5.63469	0.05024	5.62957	0.00774	5.63588	0.000955909
	5.64332	0.0291	5.6384	0.04305	5.64109	0.02204			5.64266	0.04921	5.63769	0.00772	5.64391	0.0012
	5.65141	0.0296	5.64624	0.04247	5.65007	0.0213			5.65073	0.04901	5.64552	0.00711	5.65165	0.00172
	5.65951	0.03047	5.65427	0.04119	5.65848	0.02119			5.65877	0.04977	5.65341	0.00716	5.65957	0.00182
	5.66736	0.03149	5.66273	0.03985	5.66637	0.02145			5.66657	0.04969	5.66147	0.00807	5.66779	0.000981613
	5.6752	0.0319	5.67139	0.03868	5.67413	0.02174			5.67435	0.04922	5.66941	0.00915	5.67643	0.000675762
	5.68333	0.03185	5.68036	0.03769	5.68202	0.02156			5.68259	0.04852	5.6772	0.0097	5.68551	0.000892825
	5.69182	0.03148	5.68928	0.03719	5.68987	0.02214			5.69125	0.04805	5.68518	0.00934	5.69455	0.00134
	5.70097	0.03158	5.69789	0.03607	5.69759	0.02215			5.7007	0.04797	5.69348	0.00903	5.70337	0.000748282
	5.71047	0.03221	5.70603	0.03496	5.70545	0.02214			5.71029	0.04761	5.70225	0.00942	5.71166	4.75851e-05
	5.71957	0.0323	5.71394	0.03459	5.71371	0.02213			5.71927	0.04715	5.71141	0.00943	5.71963	0.000585387
	5.72794	0.03191	5.7219	0.03428	5.72227	0.02141			5.72759	0.04709	5.72056	0.0093	5.72751	0.00102
	5.73588	0.03129	5.7299	0.03468	5.73121	0.02147			5.73554	0.04709	5.72923	0.00933	5.73555	0.00125
	5.74368	0.03118	5.73785	0.03528	5.74043	0.02158			5.74344	0.04621	5.73711	0.00905	5.74354	0.00121
	5.75166	0.03132	5.74559	0.0354	5.74934	0.02134			5.7515	0.04611	5.74478	0.00896	5.75137	0.00176
	5.75964	0.0323	5.75374	0.03522	5.75771	0.02062			5.75972	0.04665	5.75249	0.00814	5.75936	0.00179
	5.76744	0.0328	5.76248	0.03499	5.76581	0.0204			5.76765	0.04717	5.76069	0.00829	5.76765	0.00185
	5.77504	0.03338	5.77158	0.03483	5.77395	0.02055			5.77547	0.04669	5.76907	0.00896	5.77631	0.0012
	5.78297	0.03312	5.78101	0.0349	5.7821	0.02082			5.78353	0.04569	5.777	0.00968	5.78539	0.00104
	5.79148	0.03291	5.79025	0.03548	5.78996	0.02088			5.79204	0.04542	5.785	0.00915	5.79449	0.00178
	5.8006	0.03273	5.79889	0.0354	5.79761	0.01997			5.80107	0.04539	5.79323	0.00843	5.8031	0.00196
	5.81007	0.03288	5.80695	0.03479	5.80552	0.01981			5.81041	0.04592	5.80195	0.0082	5.81122	0.00155
	5.81933	0.03317	5.81486	0.03477	5.81397	0.01981			5.81947	0.04558	5.81095	0.00879	5.81909	0.00117
	5.82792	0.03264	5.82272	0.03522	5.82282	0.02022			5.82786	0.04572	5.81993	0.00939	5.82696	0.000854597
	5.83593	0.03227	5.83068	0.03577	5.83199	0.01986			5.83581	0.04561	5.82863	0.00881	5.83487	0.0011
	5.84369	0.0318	5.83863	0.03655	5.84124	0.02019			5.84358	0.04561	5.83681	0.00882	5.84287	0.00201
	5.85157	0.03174	5.84647	0.03684	5.85003	0.02087			5.85157	0.0458	5.84466	0.00918	5.8507	0.00195
	5.85954	0.03176	5.85448	0.03662	5.85828	0.02088			5.85959	0.04655	5.85253	0.00948	5.85878	0.00146
	5.86726	0.0325	5.86296	0.03649	5.86637	0.02119			5.86749	0.0473	5.86061	0.00961	5.8674	0.0012
	5.8751	0.0328	5.87202	0.03616	5.8744	0.02138			5.87536	0.04731	5.86855	0.00999	5.87629	0.00141
	5.88319	0.03283	5.88161	0.03635	5.88245	0.0223			5.88352	0.0474	5.87635	0.00982	5.8856	0.00127
	5.89162	0.0327	5.89101	0.03708	5.89048	0.02319			5.89197	0.0472	5.88438	0.00997	5.89492	0.000960487
	5.90054	0.03268	5.89974	0.03697	5.89825	0.02336			5.90101	0.04757	5.89279	0.01031	5.90371	0.000721694
	5.90962	0.03323	5.9078	0.03684	5.90613	0.02239			5.91025	0.0476	5.90154	0.01016	5.91178	0.000946674
	5.91845	0.03346	5.91563	0.03658	5.91446	0.02245			5.91922	0.04767	5.91049	0.01012	5.91969	0.00145
	5.92684	0.03339	5.92357	0.03657	5.92329	0.02258			5.9276	0.04755	5.91884	0.01059	5.9276	0.00116
	5.93481	0.03388	5.93154	0.03737	5.93269	0.023			5.9355	0.04736	5.92643	0.00975	5.93565	0.00112
	5.94277	0.03437	5.93919	0.03815	5.94209	0.02279			5.9433	0.04682	5.93465	0.00917	5.94383	0.00206
	5.95073	0.03441	5.94673	0.0384	5.95083	0.02209			5.95121	0.04691	5.94351	0.00926	5.95172	0.00321
	5.95871	0.03504	5.95468	0.03803	5.95898	0.02199			5.95935	0.04743	5.952	0.0097	5.95968	0.00207
	5.96652	0.0355	5.96311	0.03764	5.9669	0.02177			5.96714	0.0477	5.96019	0.01096	5.96817	0.00109
	5.97443	0.03571	5.97216	0.03755	5.97492	0.02165			5.975	0.04772	5.96832	0.01102	5.97718	0.000992674
	5.98279	0.03572	5.9817	0.0379	5.98308	0.02173			5.98314	0.0472	5.97616	0.00978	5.98658	0.00149
	5.99141	0.0356	5.99112	0.03812	5.99118	0.02272			5.99156	0.0468	5.98439	0.00947	5.99592	0.0017
	6.00035	0.03493	6.00004	0.03813	5.99895	0.0234			6.00062	0.04713	5.99305	0.00972	6.00461	0.000998836
	6.00948	0.03483	6.00826	0.03788	6.00681	0.02349			6.00968	0.04721	6.00202	0.00958	6.01271	0.000629361
	6.01817	0.03463	6.0161	0.03763	6.01503	0.02303			6.01848	0.04703	6.01125	0.00951	6.02052	0.000766939
	6.0264	0.03431	6.02382	0.03739	6.02365	0.0224			6.02676	0.04698	6.02036	0.00962	6.02822	0.000842361
	6.03435	0.03446	6.03171	0.03761	6.03291	0.02267			6.03474	0.04704	6.02887	0.00948	6.03601	0.000311127
	6.04223	0.03455	6.03951	0.03868	6.04231	0.02236			6.04255	0.04724	6.03684	0.00879	6.04386	0.00108
	6.05011	0.03477	6.04727	0.03928	6.05127	0.0222			6.05046	0.04779	6.04478	0.00793	6.05171	0.0016
	6.05808	0.03518	6.05513	0.03905	6.05945	0.02164			6.05848	0.04817	6.05258	0.00808	6.05978	0.00167
	6.0659	0.03529	6.06329	0.03857	6.06724	0.02194			6.06637	0.04868	6.06058	0.00955	6.06826	0.00109
	6.07393	0.03489	6.07207	0.03809	6.07502	0.02239			6.07433	0.04918	6.06851	0.01108	6.07731	0.000676374
	6.08245	0.03497	6.08143	0.03776	6.08293	0.02268			6.0827	0.04865	6.076	0.0108	6.08691	0.000934954
	6.09136	0.03533	6.0909	0.03763	6.09087	0.02299			6.09134	0.04828	6.08302	0.00976	6.09649	0.00123
	6.10066	0.03573	6.09975	0.03699	6.09868	0.02262			6.1003	0.04848	6.09031	0.00943	6.10539	0.00133
	6.11005	0.0362	6.10791	0.03685	6.10669	0.02282			6.10939	0.04871	6.09908	0.00927	6.11343	0.00122
	6.11886	0.03629	6.11573	0.03678	6.11494	0.02293			6.11812	0.04854	6.11009	0.00934	6.12114	0.00133
	6.12665	0.03599	6.12344	0.03664	6.12351	0.02289			6.12637	0.04822	6.121	0.00965	6.12891	0.00168
	6.13441	0.0361	6.13125	0.03699	6.13271	0.02261			6.13429	0.04806	6.13045	0.00984	6.13678	0.00248
	6.14262	0.03625	6.13892	0.0376	6.14204	0.02345			6.14213	0.04826	6.13869	0.00941	6.14454	0.00309
	6.15087	0.03665	6.14664	0.03835	6.15095	0.02378			6.15003	0.04834	6.1465	0.00857	6.15232	0.00341
	6.15898	0.03736	6.15458	0.03851	6.15932	0.02319			6.15802	0.04862	6.15433	0.00763	6.16031	0.00332
	6.16683	0.03786	6.1628	0.03857	6.16719	0.02303			6.16583	0.04842	6.16226	0.00846	6.16864	0.00257
	6.17479	0.03732	6.17149	0.03829	6.17486	0.02251			6.17387	0.04805	6.17001	0.00944	6.17747	0.00256
	6.1832	0.03673	6.18069	0.03871	6.18274	0.02348			6.1825	0.04735	6.1777	0.00938	6.18673	0.00232
	6.19214	0.03661	6.18996	0.03934	6.19078	0.02392			6.19145	0.04708	6.18569	0.00904	6.19594	0.00218
	6.20164	0.03685	6.19878	0.03938	6.19868	0.0238			6.20076	0.04686	6.19404	0.00843	6.20462	0.00176
	6.21108	0.03727	6.20688	0.03925	6.20665	0.02387			6.21013	0.04694	6.203	0.0077	6.21262	0.00131
	6.21993	0.03743	6.21475	0.0391	6.21487	0.02426			6.21897	0.04653	6.21254	0.00757	6.22039	0.000631973
	6.22813	0.03678	6.22258	0.03912	6.22354	0.02397			6.22714	0.04558	6.22185	0.00812	6.22807	2.97241e-05
	6.23604	0.03664	6.23054	0.03946	6.23266	0.02361			6.23493	0.04556	6.23043	0.00824	6.23592	6.70897e-05
	6.24376	0.03654	6.23829	0.04006	6.24172	0.02351			6.2427	0.04533	6.23833	0.00861	6.24372	0.000233401
	6.25156	0.03638	6.24592	0.04018	6.25049	0.02325			6.2506	0.0462	6.24578	0.00817	6.25142	0.000607824
	6.25944	0.03754	6.25383	0.04039	6.25881	0.02375			6.25867	0.04733	6.25262	0.00801	6.2593	0.000569436
	6.26727	0.03873	6.26211	0.04019	6.26672	0.02327			6.26651	0.04775	6.25957	0.00883	6.26759	0.000421218
	6.27518	0.03871	6.27084	0.03985	6.27447	0.02356			6.27451	0.04806	6.26714	0.00922	6.27633	0.000208714
	6.28324	0.03829	6.27989	0.03982	6.28232	0.02394			6.2829	0.0483	6.27594	0.00914	6.28543	0.000257687
	6.2912	0.03771	6.28907	0.03964	6.29025	0.02484			6.29184	0.0475	6.28514	0.0092	6.29462	0.000613707
	6.29993	0.03766	6.29779	0.03932	6.29801	0.02535			6.30127	0.04693	6.29412	0.00945	6.3035	0.000508678
	6.31007	0.03849	6.30605	0.03942	6.30605	0.02553			6.31064	0.04767	6.30322	0.00895	6.31181	0.000810225
	6.32004	0.03846	6.31411	0.03903	6.31455	0.02564			6.31951	0.04724	6.31269	0.00876	6.31977	0.000974553
	6.32886	0.03823	6.32213	0.03862	6.32317	0.02558			6.32768	0.04662	6.32204	0.00784	6.32762	0.00107
	6.33682	0.03875	6.3302	0.03898	6.33211	0.02576			6.33563	0.04637	6.33063	0.00762	6.33555	0.00196
	6.34453	0.03833	6.33805	0.03956	6.34103	0.02567			6.34347	0.04648	6.33861	0.0079	6.34334	0.00203
	6.35236	0.03787	6.34584	0.03988	6.34956	0.02546			6.35146	0.04739	6.34624	0.00749	6.35113	0.00192
	6.36017	0.03884	6.354	0.03924	6.35771	0.02532			6.35939	0.04816	6.35392	0.00741	6.35914	0.00164
	6.36783	0.04004	6.36272	0.03893	6.36571	0.02595			6.36721	0.0482	6.3617	0.00789	6.36739	0.00174
	6.37568	0.04025	6.3718	0.03929	6.37372	0.02611			6.37513	0.04894	6.36939	0.00841	6.3761	0.00131
	6.38378	0.03966	6.38111	0.03944	6.38167	0.02629			6.38343	0.04936	6.37707	0.00844	6.38523	0.00116
	6.39233	0.0396	6.39016	0.03961	6.38955	0.02645			6.39226	0.04893	6.385	0.00781	6.39439	0.000848599
	6.40143	0.03977	6.3986	0.03982	6.39734	0.02621			6.40171	0.04906	6.39332	0.00747	6.40292	0.000838357
	6.41084	0.03994	6.40659	0.04043	6.40549	0.02625			6.41124	0.04983	6.40214	0.00788	6.41109	0.000640825
	6.41983	0.03923	6.41456	0.04077	6.41418	0.02569			6.42021	0.04997	6.41132	0.0077	6.41906	0.000103529
	6.42802	0.03923	6.42256	0.04067	6.42332	0.02605			6.42836	0.04955	6.42042	0.00772	6.42705	8.08016e-05
	6.4358	0.03946	6.43061	0.04094	6.43279	0.02634			6.43609	0.04907	6.42864	0.00732	6.43506	0.000299407
	6.44344	0.03948	6.4385	0.04139	6.44205	0.0264			6.44373	0.04915	6.43606	0.00749	6.44287	0.000959941
	6.45102	0.03944	6.44635	0.04138	6.45066	0.02628			6.45162	0.04992	6.44408	0.00766	6.45056	0.000931919
	6.45819	0.03985	6.45451	0.04091	6.4586	0.02595			6.45957	0.05083	6.45241	0.00786	6.45873	0.000497365
	6.46545	0.04085	6.4631	0.04069	6.46644	0.02586			6.46742	0.05153	6.46065	0.00826	6.46741	0.000442425
	6.47343	0.04052	6.47219	0.04054	6.47435	0.02633			6.47524	0.05152	6.46854	0.00914	6.47648	0.000958179
	6.48224	0.04023	6.4815	0.04086	6.48228	0.02718			6.48335	0.05135	6.47623	0.00955	6.48573	0.00137
	6.4914	0.04044	6.49054	0.0412	6.49012	0.02781			6.49195	0.05087	6.4843	0.00931	6.49486	0.00116
	6.5007	0.04106	6.49895	0.04141	6.49789	0.02808			6.50117	0.05086	6.49279	0.00939	6.50348	0.000895799
	6.51004	0.04129	6.50688	0.04101	6.50598	0.02696			6.51065	0.05178	6.50159	0.00894	6.5116	0.00106
	6.51906	0.04109	6.51488	0.04069	6.51458	0.02628			6.5197	0.05191	6.51066	0.0099	6.51964	0.00138
	6.52746	0.0404	6.52313	0.04103	6.52368	0.02639			6.52797	0.0517	6.51965	0.01011	6.52771	0.00156
	6.53539	0.04035	6.53138	0.04146	6.53321	0.02644			6.53562	0.05152	6.5281	0.00945	6.53575	0.00198
	6.54319	0.04089	6.53928	0.04149	6.54254	0.0267			6.54293	0.05131	6.53614	0.00941	6.54363	0.00277
	6.55106	0.04087	6.54694	0.0412	6.5512	0.02628			6.55078	0.05194	6.54413	0.00932	6.55144	0.00339
	6.55876	0.04142	6.55474	0.04062	6.55911	0.02558			6.55887	0.05277	6.55218	0.00966	6.55946	0.00313
	6.56644	0.04206	6.56316	0.04009	6.5668	0.02487			6.56685	0.0534	6.56022	0.00977	6.56794	0.00256
	6.57435	0.04217	6.57229	0.03949	6.57475	0.02496			6.57486	0.05363	6.56794	0.00965	6.57703	0.00239
	6.58263	0.04243	6.58184	0.039	6.58287	0.02509			6.58306	0.05305	6.5757	0.00965	6.58632	0.00249
	6.59128	0.0422	6.59122	0.03926	6.59091	0.02614			6.59174	0.05168	6.58394	0.00986	6.59544	0.00293
	6.60027	0.04191	6.59981	0.03923	6.59873	0.02695			6.60081	0.05148	6.59262	0.0094	6.60398	0.00245
	6.60928	0.04212	6.6077	0.03878	6.60671	0.02695			6.61001	0.05126	6.60161	0.00932	6.61203	0.00164
	6.61785	0.04162	6.61547	0.03827	6.6151	0.02627			6.61887	0.05102	6.61087	0.00952	6.61998	0.00135
	6.62614	0.04164	6.6234	0.03848	6.62406	0.02642			6.62719	0.05075	6.61991	0.00959	6.62806	0.00154
	6.63421	0.0419	6.63146	0.03951	6.63355	0.0271			6.63513	0.0511	6.62838	0.00952	6.63629	0.00188
	6.64218	0.04208	6.63937	0.04028	6.64299	0.02751			6.64294	0.05166	6.63646	0.00929	6.64425	0.00163
	6.65022	0.04228	6.64718	0.04053	6.65174	0.02736			6.65085	0.05205	6.64457	0.00938	6.65198	0.00133
	6.65812	0.04304	6.65515	0.03998	6.65974	0.02629			6.65862	0.05259	6.6526	0.00969	6.66007	0.00134
	6.66592	0.04298	6.66342	0.03962	6.66737	0.02652			6.66628	0.05351	6.66064	0.01071	6.66846	0.00126
	6.6739	0.04268	6.6722	0.04003	6.67506	0.02651			6.67421	0.0541	6.66852	0.01092	6.67746	0.000516008
	6.68239	0.04295	6.68147	0.04055	6.68304	0.02701			6.68264	0.05444	6.67632	0.01068	6.68682	0.000518244
	6.69138	0.04295	6.69072	0.04139	6.69097	0.02766			6.69139	0.05452	6.68448	0.01011	6.69596	0.00122
	6.70073	0.04327	6.6993	0.04142	6.69877	0.0282			6.70041	0.05502	6.69313	0.01005	6.70447	0.00173
	6.70987	0.04259	6.70697	0.04127	6.70674	0.02752			6.70952	0.05613	6.70234	0.01005	6.71238	0.00147
	6.71849	0.04252	6.71421	0.04063	6.71496	0.02661			6.71809	0.05576	6.71166	0.01047	6.72016	0.000937971
	6.7266	0.04257	6.72181	0.04014	6.72361	0.02615			6.7262	0.05535	6.72057	0.01041	6.72812	0.00146
	6.73474	0.04253	6.73005	0.04025	6.73292	0.02613			6.73427	0.05584	6.72893	0.00953	6.7363	0.00213
	6.74293	0.04219	6.73854	0.04085	6.74239	0.0266			6.74224	0.05645	6.73699	0.00943	6.74439	0.00316
	6.75097	0.04284	6.74673	0.04171	6.75129	0.02615			6.75022	0.05733	6.74498	0.00942	6.75223	0.00303
	6.75882	0.04391	6.75499	0.04203	6.75938	0.02596			6.75803	0.05826	6.75307	0.00942	6.76025	0.00241
	6.76651	0.04411	6.76337	0.04194	6.76713	0.02545			6.76569	0.05863	6.76129	0.0099	6.76858	0.00235
	6.77443	0.04374	6.77221	0.04165	6.77484	0.02507			6.77367	0.05881	6.76918	0.01014	6.77736	0.00219
	6.78287	0.04335	6.78132	0.04234	6.78269	0.02526			6.78225	0.05883	6.77693	0.0104	6.78659	0.00175
	6.79191	0.0439	6.79029	0.04278	6.79043	0.02521			6.79122	0.05815	6.78503	0.00974	6.79578	0.00191
	6.80143	0.04463	6.79883	0.04255	6.79825	0.02555			6.80047	0.05775	6.79356	0.00895	6.80438	0.00181
	6.81071	0.04483	6.80691	0.04261	6.80618	0.02515			6.80964	0.05814	6.80265	0.00882	6.81243	0.00167
	6.81932	0.04467	6.81472	0.04262	6.81441	0.02474			6.8183	0.05772	6.81192	0.00979	6.82023	0.00164
	6.82735	0.04469	6.82257	0.04311	6.82317	0.02446			6.82659	0.05746	6.82095	0.01002	6.82807	0.00109
	6.83525	0.04475	6.83057	0.04329	6.83231	0.02486			6.8347	0.05746	6.8293	0.00898	6.83612	0.0015
	6.84335	0.04454	6.83851	0.04296	6.84147	0.02481			6.84265	0.05768	6.83717	0.00864	6.84399	0.002
	6.8515	0.04463	6.84636	0.04306	6.85032	0.02467			6.8506	0.05833	6.84503	0.00855	6.85178	0.00236
	6.85938	0.04544	6.85453	0.04372	6.85865	0.02449			6.85847	0.05911	6.85304	0.00886	6.85984	0.00218
	6.8671	0.046	6.86291	0.04425	6.86658	0.02457			6.86622	0.05953	6.86125	0.00944	6.86816	0.00169
	6.87502	0.04597	6.87157	0.04393	6.87444	0.02502			6.87431	0.0594	6.86915	0.01021	6.87703	0.00101
	6.88338	0.0451	6.88018	0.04408	6.88239	0.02534			6.88289	0.05955	6.87695	0.01037	6.88611	0.00103
	6.89227	0.04481	6.88856	0.04433	6.89009	0.02631			6.89201	0.05994	6.885	0.01043	6.89503	0.0014
	6.90164	0.04528	6.89693	0.04415	6.89778	0.02664			6.90143	0.06094	6.8934	0.01035	6.90362	0.000872454
	6.91087	0.0459	6.90565	0.04428	6.90585	0.02686			6.91059	0.06227	6.9023	0.01011	6.91182	0.000701254
	6.91952	0.04606	6.91409	0.04473	6.91426	0.02657			6.91916	0.06245	6.91159	0.01067	6.91975	0.000710734
	6.92751	0.04578	6.92229	0.04525	6.923	0.02651			6.92721	0.06295	6.92071	0.01125	6.92767	0.00154
	6.93526	0.04602	6.93035	0.04606	6.93203	0.02653			6.93518	0.06339	6.9292	0.01154	6.93569	0.00199
	6.94313	0.04638	6.9381	0.04586	6.94103	0.02616			6.94327	0.06379	6.93722	0.01185	6.94361	0.00183
	6.95121	0.04706	6.94594	0.04504	6.94955	0.02573			6.95143	0.06435	6.94498	0.01127	6.9515	0.00222
	6.95926	0.04732	6.95429	0.04499	6.95776	0.02543			6.95937	0.06514	6.95274	0.01112	6.95971	0.00245
	6.96714	0.04758	6.96306	0.04531	6.96578	0.02491			6.96712	0.06573	6.96075	0.01171	6.96824	0.00234
	6.97514	0.04799	6.97229	0.04564	6.97381	0.02437			6.97509	0.0652	6.96852	0.01216	6.97709	0.00187
	6.98343	0.04793	6.98169	0.0458	6.98176	0.02477			6.98349	0.06495	6.9764	0.01209	6.9862	0.00207
	6.99215	0.04714	6.99066	0.04603	6.9894	0.02517			6.99244	0.06489	6.98454	0.01147	6.99498	0.00217
	7.00133	0.04655	6.99897	0.0458	6.99707	0.02516			7.00184	0.06527	6.99302	0.01118	7.00328	0.00181
	7.01062	0.04722	7.00688	0.04599	7.00523	0.02419			7.01116	0.06518	7.00198	0.01115	7.01121	0.00116
	7.01945	0.0473	7.01482	0.04605	7.01391	0.02384			7.01978	0.06504	7.01105	0.01119	7.01902	0.000881621
	7.02766	0.04708	7.02274	0.04673	7.02301	0.02399			7.02763	0.06506	7.01998	0.01051	7.02682	0.0012
	7.03546	0.04661	7.03079	0.04815	7.03244	0.02382			7.03543	0.065	7.02845	0.01027	7.0348	0.00182
	7.04311	0.04649	7.03865	0.04885	7.04158	0.02359			7.04337	0.0649	7.03649	0.0106	7.04272	0.00224
	7.051	0.04706	7.04653	0.0491	7.05007	0.02339			7.05154	0.06541	7.04429	0.01073	7.05051	0.00195
	7.05896	0.04727	7.05474	0.04896	7.0582	0.02387			7.05954	0.06663	7.05213	0.01039	7.05881	0.00126
	7.06681	0.0473	7.06346	0.04917	7.06619	0.02384			7.06729	0.06714	7.0601	0.01035	7.06763	0.000964418
	7.07486	0.04751	7.07281	0.04962	7.07421	0.02352			7.07521	0.06671	7.06794	0.01131	7.07683	0.000941413
	7.08306	0.04775	7.08229	0.05007	7.08227	0.02404			7.0834	0.06653	7.07588	0.01171	7.08623	0.00139
	7.09173	0.0475	7.09131	0.05024	7.09013	0.02493			7.09214	0.06658	7.08423	0.01147	7.0953	0.00154
	7.1008	0.04718	7.09956	0.04998	7.09794	0.02525			7.10135	0.06654	7.09285	0.01111	7.10363	0.000954641
	7.10989	0.04681	7.10717	0.04954	7.10604	0.02457			7.11063	0.06652	7.10177	0.01128	7.11158	0.00113
	7.11862	0.047	7.115	0.04915	7.11461	0.02422			7.11935	0.06607	7.11082	0.01208	7.1195	0.000897852
	7.12689	0.04755	7.12305	0.04993	7.12382	0.02433			7.1274	0.06604	7.11956	0.01222	7.12743	0.000946367
	7.1348	0.04752	7.13106	0.05034	7.13328	0.025			7.13517	0.06561	7.12776	0.01149	7.13557	0.00163
	7.14259	0.04749	7.13899	0.05097	7.14235	0.02489			7.14291	0.06483	7.13567	0.01153	7.14343	0.00244
	7.15058	0.04762	7.14693	0.05148	7.15082	0.02433			7.15091	0.06457	7.14357	0.01234	7.15135	0.00315
	7.1585	0.04818	7.15509	0.05044	7.15883	0.02389			7.15881	0.06472	7.15149	0.01277	7.15962	0.00286
	7.16629	0.04833	7.16376	0.05006	7.16675	0.02347			7.16663	0.06462	7.15954	0.01314	7.16845	0.00235
	7.17439	0.04808	7.17308	0.05017	7.1748	0.02329			7.17467	0.06419	7.16738	0.01287	7.17774	0.00238
	7.18287	0.04825	7.18259	0.05075	7.18297	0.0233			7.183	0.06391	7.17537	0.01253	7.18714	0.00322
	7.1916	0.04838	7.19173	0.05086	7.19085	0.02353			7.19175	0.06332	7.18403	0.01229	7.19619	0.00335
	7.20057	0.04823	7.20007	0.05111	7.19862	0.02334			7.20084	0.06316	7.193	0.01193	7.20456	0.0029
	7.20949	0.04784	7.20792	0.05108	7.2067	0.02319			7.20988	0.06309	7.20232	0.01114	7.21244	0.00251
	7.21798	0.04763	7.21567	0.05178	7.21509	0.0225			7.21853	0.06315	7.21164	0.01099	7.22026	0.0026
	7.22609	0.04801	7.22355	0.0522	7.22405	0.02165			7.22664	0.0631	7.22047	0.01104	7.22821	0.00308
	7.23399	0.04877	7.23147	0.05286	7.23339	0.0216			7.23449	0.0634	7.22856	0.01042	7.23617	0.00311
	7.24188	0.04881	7.23927	0.05416	7.24257	0.02192			7.24228	0.06383	7.23643	0.01	7.24404	0.00346
	7.24983	0.04876	7.24715	0.05433	7.25112	0.02185			7.25018	0.06428	7.24421	0.00943	7.25187	0.00309
	7.25775	0.04919	7.25527	0.0543	7.259	0.02158			7.25807	0.06497	7.25207	0.00994	7.26011	0.00269
	7.2656	0.04937	7.26371	0.05387	7.26681	0.02094			7.26596	0.06472	7.26012	0.01128	7.26881	0.00168
	7.27378	0.04915	7.27273	0.05443	7.27472	0.02097			7.27414	0.06441	7.26801	0.0121	7.27806	0.00131
	7.28248	0.04863	7.28221	0.05486	7.28289	0.02187			7.28266	0.06464	7.27597	0.01147	7.28756	0.00144
	7.29169	0.04865	7.29141	0.05513	7.29089	0.02232			7.29144	0.0646	7.28437	0.0107	7.29669	0.0017
	7.30117	0.04909	7.29978	0.05518	7.29882	0.02243			7.30053	0.06439	7.29329	0.01088	7.30504	0.00163
	7.31034	0.04908	7.30768	0.05519	7.30691	0.02241			7.30956	0.06451	7.30274	0.01139	7.31281	0.00121
	7.31879	0.0484	7.31534	0.05495	7.31525	0.02274			7.31806	0.06464	7.31227	0.01168	7.32051	0.00101
	7.32678	0.04813	7.32301	0.05519	7.32402	0.02269			7.32608	0.06463	7.32131	0.01132	7.32834	0.000834715
	7.33469	0.04854	7.3308	0.05575	7.33321	0.02236			7.3341	0.06436	7.32957	0.01125	7.3362	0.00201
	7.34257	0.04919	7.3385	0.05623	7.34232	0.02238			7.34208	0.06399	7.33742	0.01162	7.34397	0.00271
	7.35059	0.04982	7.34629	0.05677	7.35093	0.02263			7.35007	0.06503	7.34531	0.0114	7.35181	0.00265
	7.35851	0.05049	7.35437	0.05663	7.35896	0.0229			7.35792	0.06611	7.35324	0.01135	7.35991	0.00187
	7.3663	0.051	7.36288	0.05648	7.36676	0.02261			7.36568	0.06612	7.36117	0.01187	7.36833	0.00156
	7.37437	0.05103	7.37186	0.05682	7.37458	0.02225			7.37392	0.06572	7.36892	0.013	7.37736	0.00153
	7.38296	0.05092	7.38105	0.05699	7.38258	0.02259			7.38265	0.06572	7.37682	0.01318	7.38686	0.00143
	7.39217	0.05086	7.39013	0.05746	7.39041	0.02287			7.39182	0.06591	7.38509	0.01208	7.39611	0.00114
	7.40172	0.05124	7.39868	0.05772	7.39822	0.02293			7.40125	0.06578	7.39384	0.01117	7.4046	0.000985868
	7.41097	0.05151	7.40669	0.05823	7.40625	0.02253			7.41041	0.06512	7.40326	0.01115	7.41258	0.00146
	7.41951	0.05137	7.41451	0.05861	7.41449	0.02213			7.41883	0.0645	7.41276	0.01157	7.42025	0.00105
	7.42747	0.05092	7.42234	0.05899	7.42332	0.02172			7.42674	0.06423	7.42176	0.01129	7.42796	0.000832854
	7.43531	0.05073	7.4302	0.05983	7.43239	0.0217			7.43468	0.06377	7.43004	0.0108	7.43583	0.000975653
	7.44328	0.05084	7.43796	0.06092	7.44131	0.02167			7.44262	0.06335	7.43782	0.01041	7.44358	0.00215
	7.45133	0.05181	7.44583	0.06173	7.44994	0.02119			7.45074	0.06362	7.44556	0.0109	7.45138	0.00274
	7.45929	0.05249	7.45412	0.06196	7.45816	0.02094			7.45859	0.06384	7.45342	0.01114	7.45938	0.0021
	7.4671	0.05252	7.46269	0.06272	7.46614	0.0214			7.46633	0.06345	7.46126	0.01127	7.46781	0.00139
	7.47511	0.05191	7.4716	0.06374	7.47407	0.02177			7.47448	0.06258	7.46897	0.0117	7.4767	0.0014
	7.48359	0.05135	7.48072	0.06433	7.4821	0.02203			7.4832	0.06151	7.47677	0.01201	7.48591	0.0018
	7.49273	0.05154	7.48946	0.06398	7.48991	0.02211			7.49242	0.061	7.48489	0.01248	7.49498	0.00135
	7.50227	0.05207	7.49772	0.06397	7.49776	0.02232			7.50188	0.06122	7.4935	0.01241	7.5035	0.00115
	7.51155	0.052	7.50585	0.06412	7.50607	0.02277			7.51103	0.06118	7.5027	0.01188	7.51158	0.00111
	7.52012	0.05215	7.51402	0.06456	7.51466	0.02299			7.51949	0.06083	7.51211	0.01172	7.51944	0.00176
	7.52801	0.05246	7.52209	0.06485	7.52358	0.02304			7.52742	0.06077	7.52118	0.01222	7.52729	0.00152
	7.53573	0.05246	7.53	0.06545	7.53271	0.02323			7.53522	0.06043	7.52951	0.01201	7.53509	0.00114
	7.54354	0.05249	7.53772	0.06609	7.54152	0.0237			7.54319	0.06049	7.53739	0.01153	7.54277	0.00164
	7.55144	0.05293	7.54557	0.0659	7.54983	0.02336			7.55116	0.06104	7.54515	0.01146	7.55062	0.00195
	7.55928	0.05404	7.55392	0.06488	7.55768	0.02325			7.55894	0.06111	7.55299	0.01193	7.5589	0.00228
	7.5671	0.05497	7.56272	0.06446	7.56552	0.02283			7.56673	0.06065	7.56075	0.0125	7.56738	0.00192
	7.57516	0.0548	7.57198	0.06445	7.57344	0.02316			7.57483	0.06004	7.56843	0.01203	7.57623	0.00179
	7.58348	0.05421	7.58125	0.06465	7.58158	0.02392			7.58335	0.05927	7.57624	0.01181	7.58542	0.00177
	7.59233	0.05453	7.59003	0.06489	7.5895	0.0241			7.5925	0.05866	7.58437	0.01157	7.59431	0.0015
	7.60173	0.05477	7.59825	0.06481	7.59751	0.02368			7.60206	0.05817	7.59296	0.0118	7.60266	0.00118
	7.61104	0.05484	7.60625	0.06513	7.60591	0.02295			7.61138	0.05784	7.60205	0.0117	7.61066	0.00108
	7.61968	0.05389	7.61428	0.06544	7.6146	0.02301			7.62006	0.05766	7.6113	0.01144	7.61867	0.0011
	7.62774	0.05344	7.62236	0.06621	7.62377	0.02334			7.62808	0.05718	7.62023	0.01129	7.62675	0.00102
	7.63552	0.0533	7.63027	0.06729	7.63319	0.02309			7.63579	0.0563	7.62852	0.01104	7.63469	0.00173
	7.6432	0.05297	7.63806	0.06799	7.64223	0.0229			7.64357	0.05626	7.63642	0.01097	7.64233	0.00164
	7.65103	0.05311	7.6459	0.06848	7.65053	0.02259			7.65154	0.05688	7.64429	0.01077	7.65016	0.00134
	7.65874	0.05364	7.65421	0.06877	7.65844	0.02284			7.65942	0.05788	7.65228	0.01113	7.65865	0.000820676
	7.66647	0.05398	7.66306	0.06958	7.66624	0.02296			7.66729	0.05841	7.66012	0.01129	7.66755	0.000612191
	7.67441	0.05376	7.67244	0.07033	7.6741	0.02293			7.67534	0.05812	7.66776	0.01196	7.6768	0.000965891
	7.6827	0.05356	7.68186	0.07092	7.68219	0.02311			7.69257	0.05767	7.67564	0.01193	7.68607	0.000791104
	7.69158	0.05341	7.6907	0.07094	7.6901	0.02338			7.7111	0.05765	7.68399	0.01166	7.69485	0.000374989
	7.70075	0.0538	7.69878	0.07085	7.69808	0.02319			7.72763	0.05732	7.69262	0.01144	7.70318	0.000237189
	7.70998	0.05419	7.7067	0.07096	7.70646	0.02222			7.743	0.05695	7.70158	0.01137	7.71129	0.000634985
	7.71871	0.05425	7.71477	0.07095	7.71521	0.02156			7.75858	0.05713	7.71071	0.01154	7.7193	0.000561956
	7.72689	0.05445	7.72296	0.07161	7.72439	0.02149			7.7746	0.05754	7.71928	0.01153	7.72741	0.000472542
	7.73483	0.05421	7.73109	0.07266	7.73373	0.02205			7.79188	0.05644	7.72753	0.01133	7.73541	0.000923539
	7.74276	0.0543	7.73884	0.07353	7.7427	0.0221			7.81013	0.05686	7.73568	0.01144	7.74316	0.0016
	7.75072	0.05505	7.74668	0.07338	7.75104	0.02149			7.82684	0.05576	7.74382	0.01205	7.7511	0.00177
	7.75848	0.05597	7.75484	0.07284	7.75895	0.02144			7.84256	0.0564	7.75186	0.01256	7.75945	0.0013
	7.76616	0.05588	7.76347	0.07285	7.76678	0.0218			7.85814	0.05707	7.75973	0.0127	7.76828	0.0013
	7.77427	0.05589	7.77282	0.07308	7.77468	0.02277			7.87402	0.05757	7.76737	0.01251	7.77767	0.00171
	7.78264	0.05619	7.78221	0.07369	7.7826	0.02284			7.89145	0.05739	7.77535	0.01256	7.787	0.00234
	7.7914	0.05627	7.79117	0.07351	7.79043	0.02272			7.90944	0.05786	7.7839	0.01268	7.79582	0.00191
	7.80052	0.05649	7.79941	0.07359	7.7984	0.02263			7.92599	0.05839	7.79288	0.01253	7.80393	0.00113
	7.80946	0.05651	7.80728	0.07377	7.80671	0.0224			7.94188	0.05828	7.80222	0.01195	7.81182	0.000923368
	7.81795	0.05655	7.81516	0.07378	7.81549	0.02222			7.95747	0.0596	7.81145	0.01192	7.81981	0.00078823
	7.8261	0.05662	7.82318	0.07422	7.82485	0.02149			7.97364	0.05933	7.82011	0.01169	7.828	0.000995298
	7.83405	0.05709	7.83122	0.07509	7.83429	0.02155			7.99178	0.06	7.82818	0.01078	7.83613	0.00143
	7.84196	0.0571	7.83908	0.07573	7.8433	0.02143			8.00975	0.05911	7.83621	0.0103	7.84388	0.00157
	7.84986	0.0577	7.847	0.07595	7.85167	0.02124			8.02629	0.05832	7.8442	0.01024	7.85175	0.00147
	7.85759	0.05802	7.8552	0.07638	7.8596	0.02047			8.04256	0.05885	7.85225	0.0109	7.85996	0.0011
	7.86537	0.05779	7.86379	0.07638	7.86736	0.02055			8.05832	0.06016	7.86014	0.01142	7.86858	0.000606182
	7.87376	0.05744	7.87285	0.07652	7.87523	0.02117			8.07435	0.06021	7.86786	0.01148	7.87782	0.000420518
	7.88258	0.05697	7.8821	0.07688	7.88299	0.02263			8.09255	0.05999	7.87587	0.01126	7.88715	0.000415571
	7.89178	0.05708	7.89102	0.07732	7.89068	0.02312			8.11085	0.06215	7.88425	0.01129	7.89615	0.000457308
	7.90113	0.05715	7.89931	0.07718	7.89852	0.02283			8.12706	0.06106	7.89332	0.01125	7.90443	0.000705107
	7.91009	0.05721	7.90717	0.07735	7.90672	0.02268			8.14318	0.06215	7.90292	0.01149	7.9123	0.000869338
	7.91844	0.05624	7.91496	0.07693	7.91531	0.02249			8.15906	0.06214	7.91232	0.01196	7.92019	0.000746733
	7.92644	0.05571	7.92292	0.07751	7.92451	0.02279			8.175	0.06213	7.92103	0.01169	7.92824	0.00137
	7.93447	0.05587	7.9309	0.07814	7.93401	0.02263			8.19276	0.06041	7.92914	0.01129	7.93618	0.00197
	7.9425	0.05607	7.93865	0.07819	7.94309	0.02184			8.21119	0.0607	7.93709	0.01124	7.94394	0.00238
	7.95054	0.05705	7.94656	0.0778	7.95145	0.02099			8.22748	0.0591	7.94505	0.01122	7.95186	0.00208
	7.95839	0.05808	7.95471	0.0776	7.95944	0.02073			8.24333	0.05887	7.95324	0.01152	7.96019	0.00179
	7.9662	0.05836	7.96337	0.07733	7.96737	0.02024			8.25926	0.06028	7.96135	0.01183	7.96883	0.00211
	7.97445	0.05835	7.9724	0.07684	7.97523	0.02011			8.27529	0.06001	7.96909	0.01186	7.97791	0.00225
	7.9832	0.05857	7.98137	0.07697	7.98303	0.02071			8.29277	0.06095	7.97692	0.01127	7.98711	0.00213
	7.99246	0.05865	7.9901	0.07688	7.9906	0.02114			8.31085	0.06113	7.98521	0.01032	7.99593	0.00175
	8.00183	0.05905	7.99833	0.07737	7.99819	0.02114			8.32705	0.06192	7.99399	0.00979	8.00416	0.0012
	8.01076	0.05948	8.00625	0.07747	8.00614	0.02016			8.34271	0.0614	8.00322	0.00986	8.01202	0.00102
	8.0191	0.05927	8.01411	0.0776	8.01461	0.0192			8.35854	0.06315	8.01243	0.01023	8.01988	0.000483401
	8.02708	0.05935	8.02205	0.07741	8.02361	0.01961			8.37459	0.06215	8.02117	0.00995	8.02785	0.000459948
	8.0351	0.05882	8.02999	0.07803	8.03291	0.02053			8.39194	0.06226	8.02934	0.00928	8.03578	0.000778881
	8.04319	0.05839	8.03783	0.07844	8.04203	0.02013			8.40998	0.06208	8.03724	0.00924	8.04341	0.00111
	8.05121	0.05929	8.04591	0.07891	8.05049	0.01956			8.42654	0.0621	8.04513	0.00952	8.05128	0.00112
	8.05901	0.05976	8.05432	0.0797	8.05845	0.01947			8.44231	0.06239	8.05323	0.00984	8.05945	0.000893721
	8.06681	0.05945	8.06292	0.08041	8.06633	0.01957			8.45811	0.06338	8.0612	0.01035	8.06797	0.000557791
	8.07495	0.05889	8.072	0.08089	8.07428	0.01987			8.47454	0.064	8.069	0.01055	8.07699	0.000539031
	8.08348	0.05816	8.08101	0.08119	8.08212	0.02001			8.49214	0.06384	8.07699	0.0106	8.08602	0.00104
	8.09261	0.05822	8.08957	0.08101	8.08984	0.02061			8.5099	0.0644	8.08526	0.01046	8.09478	0.001
	8.10213	0.05866	8.09769	0.08093	8.09757	0.02106			8.52584	0.06406	8.10313	0.01006	8.10309	0.00058326
	8.11137	0.0585	8.10576	0.08155	8.10559	0.02101			8.5416	0.06481	8.12103	0.01032	8.11111	0.000525981
	8.11971	0.05835	8.11374	0.08188	8.11408	0.02078			8.55742	0.0662	8.137	0.01048	8.11904	0.000660748
	8.12754	0.05891	8.12172	0.08272	8.12302	0.02081			8.57398	0.0661	8.15283	0.0107	8.12703	0.00142
	8.13539	0.05916	8.12962	0.08352	8.13228	0.02072			8.59215	0.06645	8.16851	0.01127	8.135	0.00182
	8.14342	0.0591	8.13744	0.08352	8.1412	0.02047			8.61034	0.06644	8.18473	0.01048	8.14278	0.00159
	8.15146	0.05976	8.14553	0.0831	8.14949	0.02			8.62655	0.06634	8.20263	0.01011	8.15083	0.00175
	8.15928	0.0606	8.15413	0.08264	8.15749	0.01968			8.6423	0.06655	8.22028	0.0085	8.1593	0.00158
	8.16712	0.06163	8.16314	0.08265	8.16544	0.01968			8.65806	0.06832	8.23626	0.00875	8.16796	0.00149
	8.17523	0.06122	8.17258	0.08224	8.17347	0.01987			8.67446	0.06758	8.25209	0.00813	8.17692	0.00128
	8.18365	0.06103	8.1819	0.08229	8.18138	0.02079			8.69302	0.06776	8.26781	0.00955	8.18599	0.00185
	8.19264	0.06126	8.19057	0.08223	8.18912	0.02106			8.7114	0.06857	8.2844	0.00964	8.19465	0.00198
	8.2019	0.06203	8.19856	0.08201	8.19709	0.02011			8.72734	0.06821	8.30227	0.01013	8.20275	0.00167
	8.21094	0.06219	8.20639	0.08163	8.20551	0.01965			8.74322	0.06878	8.31973	0.00992	8.21059	0.00114
	8.21938	0.06142	8.21422	0.08166	8.22353	0.02002			8.7589	0.06933	8.33564	0.01014	8.21842	0.00129
	8.22732	0.06136	8.22222	0.08278	8.24174	0.01904			8.77519	0.06891	8.35146	0.01	8.22635	0.00178
	8.23505	0.0616	8.23024	0.08366	8.25805	0.01913			8.7935	0.0681	8.36728	0.00991	8.23433	0.00207
	8.24288	0.06242	8.2381	0.08431	8.27394	0.01821			8.81172	0.06887	8.38445	0.00961	8.2421	0.00196
	8.25086	0.06283	8.24615	0.08417	8.28979	0.01985			8.82755	0.06843	8.40303	0.00906	8.25026	0.00134
	8.25865	0.06317	8.25471	0.08452	8.30634	0.01897			8.84314	0.06894	8.42073	0.00842	8.25904	0.00119
	8.26649	0.06295	8.26381	0.08448	8.32448	0.01915			8.85897	0.07115	8.4365	0.00847	8.26809	0.000732363
	8.27463	0.06308	8.27331	0.08471	8.34257	0.01809			8.8751	0.07118	8.45239	0.00873	8.27749	3.20211e-05
	8.28316	0.0627	8.28267	0.08519	8.35875	0.01732			8.89288	0.07171	8.46802	0.00969	8.28676	0.000482849
	8.29211	0.06192	8.29133	0.08531	8.37486	0.01712			8.91154	0.0722	8.48472	0.00868	8.29541	0.000421611
	8.3012	0.06205	8.29934	0.0853	8.3907	0.0164			8.92756	0.07365	8.50347	0.00951	8.30342	0.000188579
	8.31009	0.06231	8.30716	0.08467	8.407	0.01484			8.94303	0.07371	8.52125	0.00876	8.31132	0.000291256
	8.31847	0.06194	8.31507	0.08508	8.42485	0.01375			8.95843	0.07591	8.53705	0.0093	8.31915	0.00047247
	8.32651	0.06108	8.32309	0.08538	8.44285	0.01414			8.97441	0.07627	8.55314	0.00917	8.32714	0.000589074
	8.33445	0.06065	8.33101	0.08643	8.45889	0.01337			8.99209	0.07647	8.56875	0.01051	8.33517	0.000946386
	8.34235	0.06108	8.33882	0.08722	8.47483	0.01375			9.01036	0.07715	8.58512	0.00908	8.34297	0.000678915
	8.35032	0.06191	8.34674	0.0871	8.49088	0.0155			9.02667	0.07713	8.6038	0.00855	8.35098	0.000592652
	8.35815	0.06245	8.35517	0.08698	8.50707	0.01516			9.04237	0.07801	8.62187	0.00804	8.35943	0.000653778
	8.36612	0.06252	8.36415	0.0871	8.5247	0.0155			9.05778	0.07833	8.63757	0.00772	8.36854	0.000458953
	8.37447	0.06274	8.37364	0.08756	8.5428	0.01461			9.07423	0.07919	8.65311	0.00763	8.37823	0.0007366
	8.38304	0.06302	8.38299	0.08792	8.55885	0.01469			9.09191	0.07857	8.66881	0.00828	8.38772	0.000968448
	8.39198	0.06314	8.39168	0.08832	8.57459	0.0135			9.10962	0.07896	8.68512	0.00774	8.39646	0.000741823
	8.40107	0.06334	8.39976	0.08798	8.59021	0.01479			9.12596	0.07881	8.70333	0.00739	8.40451	0.00057051
	8.40982	0.06366	8.40747	0.0883	8.60633	0.01301			9.142	0.07922	8.72153	0.00737	8.41225	0.000183069
	8.4181	0.06366	8.41514	0.08858	8.62404	0.01316			9.15746	0.08011	8.73728	0.00768	8.42004	0.000213469
	8.42603	0.06431	8.42295	0.0894	8.64176	0.0127			9.17412	0.08	8.75279	0.00782	8.42801	0.000905078
	8.43387	0.06443	8.43077	0.09053	8.65783	0.01286			9.1925	0.08043	8.76829	0.00891	8.43593	0.00172
	8.44176	0.06406	8.43852	0.09137	8.67379	0.01319			9.21025	0.07993	8.78465	0.00824	8.4437	0.00174
	8.44976	0.06483	8.44646	0.09187	8.68957	0.01386			9.2264	0.08058	8.80263	0.00804	8.45167	0.000777862
	8.4576	0.06569	8.45483	0.09203	8.70622	0.0144			9.24229	0.08119	8.82065	0.00704	8.46002	7.68483e-06
	8.46562	0.06566	8.4636	0.09175	8.72393	0.01354			9.25793	0.08276	8.83666	0.00704	8.46894	0.00025161
	8.47415	0.06516	8.47285	0.09245	8.74136	0.01392			9.27463	0.08285	8.85231	0.0072	8.47846	8.44523e-05
	8.48298	0.06511	8.48229	0.09331	8.75738	0.0132			9.29322	0.08299	8.86761	0.00792	8.488	0.000236491
	8.49219	0.06535	8.49113	0.09356	8.77332	0.01424			9.311	0.08336	8.88425	0.00806	8.49689	0.000130245
	8.50154	0.06619	8.49928	0.09351	8.78932	0.01412			9.3271	0.0828	8.9023	0.00783	8.50498	0.000264379
	8.51032	0.06588	8.50707	0.09329	8.80602	0.01394			9.34316	0.08301	8.9197	0.00788	8.51274	0.000220491
	8.51842	0.06523	8.5148	0.09421	8.82418	0.01391			9.35888	0.08273	8.9358	0.00757	8.52042	0.000310565
	8.52641	0.06541	8.52266	0.09477	8.84213	0.01358			9.37527	0.08221	8.95174	0.00775	8.52828	0.000260018
	8.53435	0.06547	8.53042	0.09518	8.85794	0.01352			9.39355	0.08104	8.96717	0.00764	8.53614	0.00104
	8.54236	0.06583	8.53818	0.09594	8.87372	0.01337			9.41123	0.08076	8.98419	0.00781	8.54399	0.00178
	8.5504	0.06651	8.54611	0.09651	8.88972	0.01466			9.42694	0.08018	9.00259	0.00747	8.55195	0.00188
	8.55833	0.06691	8.55439	0.09647	8.90627	0.01356			9.44294	0.08058	9.01995	0.00726	8.56017	0.0016
	8.56643	0.06717	8.56315	0.09654	8.92485	0.01393			9.45875	0.08192	9.03608	0.00764	8.56883	0.00123
	8.57482	0.06726	8.57236	0.09692	8.94292	0.01334			9.47502	0.08123	9.05215	0.00783	8.57801	0.00144
	8.58375	0.06663	8.58161	0.09743	8.95879	0.01339			9.49274	0.08173	9.06773	0.00789	8.58737	0.00182
	8.59325	0.0666	8.59045	0.09803	8.97449	0.01426			9.51073	0.08168	9.08477	0.0077	8.59625	0.00161
	8.60269	0.06729	8.59872	0.09781	8.99035	0.01498			9.52661	0.08192	9.1035	0.00768	8.60443	0.00123
	8.61155	0.06755	8.60671	0.09832	9.007	0.01493			9.54246	0.08193	9.12067	0.00682	8.61223	0.000882644
	8.6197	0.06755	8.61455	0.09895	9.02524	0.01391			9.55832	0.08298	9.13674	0.0071	8.61994	0.00107
	8.62755	0.0667	8.62243	0.09938	9.0433	0.01468			9.5747	0.08246	9.15302	0.00811	8.62777	0.0013
	8.63527	0.0665	8.63014	0.10015	9.05917	0.01353			9.59265	0.08201	9.16861	0.00837	8.63552	0.00114
	8.64308	0.06725	8.63782	0.10051	9.07472	0.01446			9.61031	0.08124	9.1854	0.00764	8.64328	0.00115
	8.65103	0.06783	8.64585	0.10091	9.09023	0.01469			9.62649	0.08066	9.2039	0.00793	8.65117	0.000659328
	8.65893	0.06773	8.65432	0.1015	9.10665	0.01503			9.64223	0.08056	9.22125	0.00732	8.65937	6.92527e-06
	8.6669	0.06768	8.66309	0.10231	9.12478	0.0149			9.65788	0.08061	9.23692	0.00654	8.66811	0.000575507
	8.6752	0.06704	8.67214	0.10321	9.14294	0.01502			9.67451	0.07998	9.25311	0.00677	8.67731	0.000903779
	8.68397	0.06679	8.68114	0.10379	9.15886	0.01491			9.69233	0.08003	9.26867	0.00716	8.68651	0.000773839
	8.69334	0.06681	8.6896	0.1039	9.17442	0.01522			9.70974	0.07914	9.28504	0.00666	8.69532	0.000951034
	8.70272	0.06662	8.69777	0.10387	9.18982	0.01653			9.72558	0.07849	9.30336	0.00668	8.70357	0.00104
	8.71161	0.06676	8.70578	0.10406	9.20607	0.01566			9.74151	0.07744	9.32088	0.00745	8.7115	0.00108
	8.71979	0.06673	8.7138	0.10451	9.22413	0.01598			9.75718	0.07671	9.33661	0.00803	8.71938	0.000509151
	8.7276	0.0665	8.72178	0.10548	9.24202	0.01531			9.77426	0.07463	9.35254	0.00876	8.72729	0.000198825
	8.73537	0.06632	8.72956	0.10577	9.258	0.01516			9.79288	0.07372	9.36826	0.00913	8.73502	0.000415831
	8.74328	0.06669	8.73728	0.10595	9.27381	0.01535			9.81028	0.07212	9.38482	0.0089	8.74272	0.000972113
	8.75115	0.06746	8.74538	0.10573	9.28927	0.01632			9.82612	0.0719	9.40286	0.0091	8.7508	0.000882332
	8.75889	0.06845	8.75407	0.10557	9.30566	0.01675			9.84216	0.07204	9.42017	0.008	8.76793	0.000998095
	8.76676	0.06832	8.76326	0.10562	9.32345	0.01696			9.85784	0.07256	9.43598	0.00784	8.7861	0.00163
	8.77497	0.06787	8.77267	0.10565	9.34106	0.01714			9.8748	0.07142	9.45181	0.00778	8.80277	0.000867485
	8.78358	0.06813	8.78174	0.10638	9.35722	0.01717			9.89362	0.07151	9.46753	0.00848	8.8188	0.00168
	8.79277	0.06896	8.79014	0.10649	9.37329	0.01808			9.91119	0.07085	9.48435	0.00832	8.8346	0.00236
	8.80232	0.06925	8.79815	0.1066	9.3888	0.01768			9.92689	0.07095	9.50245	0.00927	8.85049	0.00203
	8.81144	0.06899	8.80624	0.10682	9.40573	0.01737			9.94285	0.0714	9.51958	0.00892	8.8681	0.00135
	8.81971	0.06852	8.81431	0.10744	9.42415	0.01714			9.95852	0.07177	9.53563	0.01008	8.88658	0.00139
	8.82748	0.06817	8.82247	0.1087	9.44177	0.01693			9.97534	0.07116	9.55154	0.01084	8.90327	0.000406292
	8.83516	0.06765	8.83037	0.10949	9.45778	0.01643			9.99406	0.07107	9.56726	0.01018	8.91927	0.000781472
	8.84298	0.06789	8.83812	0.11	9.4738	0.01689			10.0117	0.07055	9.58462	0.00927	8.93514	0.00177
	8.85075	0.06825	8.84621	0.11003	9.48951	0.01763			10.0273	0.07038	9.60337	0.00908	8.951	0.00162
	8.85848	0.06884	8.85471	0.11075	9.50622	0.01753			10.043	0.07146	9.62034	0.00809	8.96889	0.00128
	8.86643	0.06907	8.86386	0.11146	9.52473	0.01759			10.0587	0.07237	9.63626	0.00774	8.98753	0.00135
	8.87455	0.06863	8.87328	0.11265	9.54233	0.01707			10.0751	0.07249	9.65228	0.00922	9.00406	0.000683886
	8.88315	0.06809	8.88238	0.11363	9.55842	0.01749			10.0935	0.07248	9.66779	0.00916	9.01997	0.000213926
	8.89217	0.06803	8.8908	0.11358	9.57466	0.018			10.1114	0.07268	9.68513	0.00885	9.03598	0.00134
	8.90136	0.06818	8.89867	0.11422	9.59044	0.01851			10.127	0.07277	9.704	0.00934	9.05181	0.00135
	8.91034	0.06805	8.90665	0.11406	9.60702	0.01757			10.1426	0.07342	9.72102	0.00891	9.06907	0.000595167
	8.91873	0.06801	8.91473	0.11466	9.62536	0.01809			10.1581	0.07424	9.7368	0.00904	9.08762	0.000798792
	8.9267	0.06766	8.92302	0.1149	9.64292	0.0175			10.1744	0.07419	9.75276	0.01027	9.10412	0.000816212
	8.9345	0.06765	8.93101	0.1157	9.65872	0.01718			10.1926	0.07417	9.76836	0.01074	9.11981	0.00102
	8.94234	0.06744	8.93876	0.11596	9.67479	0.01752			10.2104	0.07367	9.78537	0.00951	9.13595	0.00154
	8.95014	0.06777	8.94682	0.11538	9.69048	0.01826			10.2263	0.07406	9.80432	0.00978	9.15185	0.00198
	8.95786	0.06809	8.95535	0.11476	9.70693	0.01755			10.2418	0.07377	9.82163	0.0088	9.16912	0.00125
	8.96575	0.06808	8.96442	0.11447	9.72489	0.01766			10.2573	0.07389	9.83721	0.00826	9.18748	0.00184
	8.97409	0.06807	8.97372	0.11472	9.74243	0.01844			10.2744	0.07384	9.85305	0.00944	9.2041	0.00122
	8.98263	0.06836	8.98279	0.11508	9.75821	0.01834			10.2924	0.07342	9.86863	0.01043	9.21966	0.00125
	8.99161	0.06909	8.99129	0.11524	9.77409	0.01913			10.3096	0.07229	9.88537	0.0098	9.23544	0.00163
	9.0007	0.06942	8.9992	0.11489	9.78972	0.0196			10.3258	0.07234	9.90397	0.00956	9.25134	0.00126
	9.00891	0.06925	9.00706	0.11509	9.80625	0.01948			10.3416	0.0733	9.92123	0.00973	9.26852	0.000221464
	9.01704	0.06948	9.01506	0.11557	9.82431	0.01854			10.357	0.07254	9.93666	0.00897	9.28671	3.11254e-05
	9.02519	0.06998	9.02327	0.11624	9.84186	0.01855			10.3742	0.07275	9.95231	0.00991	9.30342	4.85157e-05
	9.03338	0.07006	9.03123	0.1169	9.85784	0.0183			10.3928	0.07197	9.968	0.0093	9.31919	0.000464248
	9.0416	0.06988	9.03904	0.11738	9.87369	0.01884			10.41	0.0713	9.98488	0.00874	9.33499	0.00101
	9.0496	0.07065	9.04708	0.11761	9.88942	0.01971			10.4261	0.06945	10.0032	0.00874	9.35115	0.000724709
	9.05758	0.07114	9.05553	0.11806	9.90617	0.01936			10.4423	0.06974	10.0204	0.00859	9.36866	0.00136
	9.06559	0.07114	9.06439	0.11818	9.92429	0.02			10.4579	0.06787	10.0361	0.00795	9.38653	0.000906712
	9.07409	0.07047	9.0736	0.11846	9.94144	0.01917			10.4748	0.06671	10.0518	0.00921	9.4028	0.00129
	9.08305	0.07045	9.08268	0.11948	9.95718	0.0202			10.4935	0.06566	10.0674	0.00993	9.41864	0.00083509
	9.09223	0.07056	9.09114	0.12019	9.97308	0.01983			10.5106	0.06427	10.0844	0.00967	9.43447	0.00146
	9.10138	0.07009	9.0991	0.12018	9.9889	0.02112			10.5265	0.06302	10.1025	0.01014	9.45075	0.000260411
	9.11012	0.06974	9.1069	0.12029	10.0061	0.01955			10.5427	0.06242	10.1194	0.0097	9.46894	0.000613125
	9.11839	0.06925	9.11476	0.12058	10.0246	0.02022			10.5582	0.0619	10.1354	0.00973	9.4872	0.000393284
	9.12649	0.06917	9.12281	0.12162	10.0419	0.01915			10.5752	0.05888	10.1512	0.01075	9.5034	0.00123
	9.13464	0.06932	9.1306	0.12225	10.0578	0.01884			10.5939	0.05835	10.1668	0.01096	9.5191	0.000648027
	9.14262	0.06998	9.13835	0.12232	10.0739	0.01885			10.611	0.05583	10.1844	0.01081	9.53509	0.000160099
	9.15048	0.07029	9.14642	0.12183	10.0898	0.01925			10.6268	0.0554	10.2031	0.01122	9.55113	0.000292676
	9.15822	0.07047	9.15484	0.12212	10.1069	0.01929			10.643	0.05478	10.2201	0.01064	9.56917	0.000368947
	9.16623	0.07021	9.16379	0.12237	10.1255	0.01863			10.6587	0.05545	10.2361	0.01036	9.58767	0.00036551
	9.17465	0.07057	9.1729	0.12247	10.1429	0.01982			10.6754	0.05468	10.2521	0.01139	9.60388	9.3738e-06
	9.18369	0.07106	9.18173	0.12273	10.1586	0.01949			10.6936	0.05531	10.2677	0.01062	9.61969	0.000289436
	9.19315	0.07111	9.19013	0.12263	10.1741	0.0212			10.711	0.05553	10.2853	0.01016	9.63555	0.00178
	9.20239	0.0713	9.19815	0.12276	10.1899	0.02031			10.7266	0.05553	10.3038	0.01043	9.65158	0.00116
	9.21097	0.07168	9.20602	0.1227	10.207	0.02031			10.7425	0.05656	10.3205	0.01042	9.66966	0.000712607
	9.21897	0.07153	9.21393	0.12243	10.2261	0.01949			10.7583	0.05695	10.3365	0.00977	9.68837	0.000255335
	9.22691	0.07122	9.22191	0.12304	10.2436	0.01942			10.7751	0.05769	10.3527	0.01185	9.70441	3.96653e-05
	9.23508	0.07154	9.22981	0.12401	10.2592	0.01863			10.7932	0.05717	10.3684	0.01139	9.72003	0.000284496
	9.24329	0.07189	9.23774	0.12453	10.2748	0.01971			10.8101	0.05685	10.3855	0.01134	9.73588	0.00124
	9.25124	0.07273	9.24608	0.12409	10.2903	0.02059			10.826	0.05729	10.4042	0.01069	9.75177	0.00171
	9.25898	0.07295	9.25466	0.12401	10.3072	0.01966			10.8419	0.05789	10.4209	0.00993	9.7693	0.000891941
	9.26692	0.07229	9.26355	0.12429	10.3256	0.01968			10.8577	0.05725	10.4368	0.00899	9.78795	0.00172
	9.27521	0.07189	9.27259	0.12523	10.3429	0.01953			10.8749	0.05683	10.4529	0.0094	9.80419	0.000874071
	9.28413	0.07206	9.28133	0.12581	10.3585	0.01941			10.8929	0.0582	10.4686	0.00979	9.81965	0.00113
	9.29355	0.07197	9.2895	0.12581	10.3741	0.0193			10.9096	0.05724	10.4856	0.00942	9.83524	0.000795067
	9.30279	0.07185	9.29737	0.12625	10.3895	0.01984			10.9254	0.05845	10.504	0.01078	9.85099	0.000865822
	9.3114	0.07193	9.30521	0.12669	10.4062	0.01943			10.9414	0.05972	10.5207	0.00964	9.86821	0.000487629
	9.31937	0.07167	9.31308	0.12695	10.4245	0.01922			10.9573	0.06066	10.5363	0.01092	9.88657	0.00057519
	9.32722	0.07192	9.32105	0.12711	10.442	0.01909			10.9748	0.06011	10.5523	0.01127	9.90306	0.00092542
	9.33515	0.07185	9.3289	0.12733	10.4578	0.01869			10.9935	0.06098	10.5679	0.01192	9.91895	0.000524284
	9.34315	0.07185	9.33678	0.12745	10.4736	0.01946			11.0103	0.06037	10.5849	0.01066	9.93473	0.000928808
	9.3511	0.07305	9.34511	0.12765	10.4891	0.01937			11.0259	0.0607	10.603	0.0116	9.95086	0.000607234
	9.35886	0.07346	9.3539	0.12759	10.5059	0.01949			11.0419	0.06218	10.62	0.01074	9.96838	0.000997233
	9.36686	0.07328	9.36315	0.1276	10.524	0.01969			11.0578	0.06193	10.6358	0.01062	9.98632	0.000391659
	9.37517	0.07348	9.37262	0.12778	10.5412	0.02			11.0754	0.06172	10.6517	0.01092	10.0026	0.000574552
	9.38385	0.07347	9.38175	0.12823	10.5572	0.02012			11.0942	0.06178	10.6677	0.01044	10.0186	0.000414192
	9.39315	0.07359	9.39019	0.12847	10.573	0.02088			11.1111	0.06196	10.6851	0.01057	10.034	0.00111
	9.40245	0.0745	9.39809	0.12841	10.5888	0.02056			11.1269	0.06188	10.7032	0.01077	10.0504	0.00063251
	9.41121	0.07467	9.40601	0.12859	10.6062	0.0198			11.1427	0.06345	10.7196	0.0107	10.0685	0.000138955
	9.41932	0.07466	9.41401	0.1294	10.6246	0.01967			11.1586	0.06339	10.7353	0.011	10.0865	0.0001384
	9.42707	0.07478	9.42206	0.13085	10.6418	0.01879			11.1759	0.06295	10.7512	0.01253	10.1029	0.00148
	9.43486	0.07487	9.42993	0.13158	10.6578	0.01868			11.1948	0.06285	10.7672	0.01259	10.1191	0.00113
	9.44285	0.07552	9.43788	0.13121	10.6738	0.01952			11.2118	0.06161	10.7848	0.01173	10.1349	0.000815442
	9.45079	0.07572	9.44623	0.13111	10.6896	0.01948			11.2271	0.06088	10.8034	0.01212	10.1512	0.000462801
	9.45856	0.07605	9.45501	0.1315	10.7066	0.01923			11.2427	0.06045	10.82	0.01044	10.1695	0.000702046
	9.46654	0.07652	9.46433	0.13186	10.7252	0.0193			11.2585	0.05991	10.8358	0.01132	10.1875	6.19782e-05
	9.47482	0.07621	9.4738	0.13186	10.7422	0.01941			11.2755	0.05791	10.8518	0.01153	10.2035	0.00022195
	9.48359	0.07559	9.48283	0.13223	10.7583	0.01894			11.294	0.05781	10.8676	0.0119	10.2198	0.000282986
	9.49268	0.07554	9.4911	0.13246	10.7743	0.02038			11.3112	0.05734	10.8856	0.01016	10.2357	4.33548e-05
	9.50174	0.07583	9.4989	0.13304	10.79	0.01966			11.3267	0.05717	10.9044	0.0117	10.2517	0.00128
	9.51036	0.07558	9.50672	0.1332	10.807	0.01914			11.3423	0.05806	10.9209	0.01052	10.2697	0.00166
	9.51847	0.07544	9.51473	0.13335	10.8257	0.01922			11.3579	0.05785	10.9367	0.01084	10.2877	0.00205
	9.5263	0.07527	9.52282	0.13463	10.8428	0.01878			11.3748	0.05727	10.9528	0.01195	10.3037	0.00222
	9.53407	0.07528	9.53072	0.13579	10.8584	0.01858			11.393	0.05605	10.9686	0.01186	10.3197	0.0016
	9.54201	0.0756	9.53854	0.13591	10.8745	0.01963			11.4101	0.05552	10.9862	0.01138	10.3357	3.24056e-05
	9.54999	0.07607	9.54671	0.13566	10.8904	0.02059			11.4257	0.05452	11.0048	0.01069	10.3518	0.000461011
	9.55782	0.07603	9.55537	0.13571	10.907	0.01872			11.4414	0.05572	11.0212	0.0106	10.3695	0.000498916
	9.56589	0.07572	9.56468	0.13604	10.9255	0.01938			11.457	0.05526	11.0368	0.00967	10.3877	0.000241396
	9.57427	0.07578	9.57424	0.13682	10.9426	0.01843			11.4741	0.0557	11.0525	0.01133	10.4037	0.000171459
	9.58303	0.07573	9.58329	0.13713	10.9583	0.01873			11.4925	0.05596	11.0684	0.01101	10.4195	0.000198694
	9.59215	0.07612	9.59164	0.13672	10.9742	0.01871			11.5094	0.05544	11.0856	0.011	10.4352	0.000174122
	9.60117	0.07636	9.59952	0.13708	10.99	0.01958			11.5256	0.05595	11.1045	0.01067	10.4514	0.000394075
	9.60965	0.07732	9.60715	0.13739	11.0067	0.01869			11.5414	0.05739	11.1212	0.01009	10.4691	0.0007136
	9.61763	0.07794	9.61495	0.13782	11.0248	0.01857			11.5571	0.05733	11.1366	0.00996	10.4868	0.00151
	9.62558	0.0782	9.6229	0.13868	11.042	0.01796			11.5747	0.05659	11.1521	0.01055	10.5029	0.00146
	9.63352	0.07814	9.63075	0.1396	11.0578	0.01682			11.5932	0.05691	11.1677	0.01128	10.5188	0.00168
	9.64144	0.07877	9.63854	0.14038	11.0738	0.01754			11.6098	0.05542	11.185	0.01013	10.5345	9.8588e-05
	9.64932	0.0796	9.64658	0.14077	11.0896	0.01634			11.6259	0.05491	11.2034	0.01031	10.5509	0.00144
	9.65713	0.07953	9.6551	0.14034	11.1068	0.01587			11.6421	0.05572	11.2203	0.00939	10.5687	0.000904119
	9.66533	0.07909	9.66417	0.1399	11.1249	0.01544			11.6577	0.05521	11.236	0.00899	10.5864	0.00168
	9.67412	0.07904	9.6736	0.14035	11.1413	0.01553			11.6753	0.05479	11.2515	0.0089	10.6024	0.000846831
	9.68332	0.07941	9.68286	0.14083	11.157	0.01544			11.694	0.05436	11.2675	0.0082	10.6183	0.00105
	9.69278	0.07898	9.69136	0.14146	11.1729	0.01674			11.7105	0.05327	11.285	0.00849	10.6341	0.000143064
	9.70192	0.07904	9.6993	0.14156	11.1888	0.01749			11.7265	0.05219	11.303	0.0085	10.6508	0.000728996
	9.71037	0.07858	9.70701	0.14157	11.2066	0.01663			11.7428	0.05362	11.3194	0.00931	10.6692	0.000469153
	9.71835	0.07866	9.71468	0.14234	11.2252	0.01727			11.7584	0.0533	11.3355	0.00914	10.6872	0.000173181
	9.72625	0.07905	9.72239	0.14312	11.2417	0.0154			11.7755	0.05257	11.3512	0.01121	10.7031	0.00157
	9.73418	0.07905	9.73019	0.14363	11.2576	0.01542			11.7942	0.05352	11.3673	0.01045	10.7189	0.000934333
	9.74231	0.07978	9.73811	0.14384	11.2736	0.01478			11.8109	0.05249	11.3852	0.01133	10.7347	0.000483132
	9.75022	0.08074	9.74621	0.14436	11.2896	0.01547			11.8265	0.05205	11.4034	0.01045	10.7512	0.0011
	9.75806	0.08137	9.75467	0.1448	11.3073	0.01447			11.8428	0.05215	11.4198	0.00933	10.7699	0.00209
	9.76616	0.08096	9.7636	0.14485	11.3259	0.01516			11.8587	0.05258	11.4359	0.00896	10.788	0.00121
	9.77485	0.08052	9.77281	0.1446	11.3426	0.01461			11.8757	0.05137	11.4517	0.00943	10.804	0.00158
	9.78412	0.08032	9.78187	0.14476	11.3584	0.01462			11.894	0.05249	11.4679	0.00867	10.8198	0.0012
	9.79361	0.08072	9.79045	0.14527	11.3743	0.01539			11.9108	0.05153	11.486	0.00745	10.8354	0.000803098
	9.80279	0.08081	9.7985	0.14547	11.3901	0.01461			11.9264	0.05127	11.5043	0.00854	10.8519	0.00175
	9.8113	0.08059	9.80635	0.14564	11.4076	0.01425			11.9423	0.05226	11.5206	0.00767	10.8704	0.00156
	9.81922	0.08058	9.81426	0.14576	11.4264	0.01401			11.9582	0.05215	11.5366	0.00838	10.8884	0.00197
	9.82702	0.08083	9.82208	0.14691	11.443	0.01408			11.9753	0.05136	11.5526	0.00903	10.904	0.00164
	9.83492	0.08138	9.82973	0.14799	11.4585	0.01299			11.9933	0.0516	11.5686	0.00926	10.9191	0.000924519
	9.84287	0.08148	9.83757	0.14832	11.4742	0.01456			12.0101	0.05104	11.5863	0.0086	10.9352	0.000557569
	9.85075	0.08199	9.84585	0.14884	11.49	0.01426			12.0258	0.05024	11.6046	0.00826	10.9518	0.000428611
	9.85862	0.08256	9.85449	0.14934	11.5071	0.0135			12.0417	0.051	11.6207	0.00755	10.9699	0.000729767
	9.86668	0.08254	9.8634	0.15025	11.5259	0.01379			12.0577	0.05034	11.6364	0.00639	10.9882	0.0013
	9.87523	0.08229	9.87254	0.15117	11.5427	0.01368			12.075	0.04948	11.6523	0.00742	11.004	0.00144
	9.88433	0.08211	9.88132	0.15098	11.5582	0.01377			12.0928	0.0502	11.6683	0.00638	11.0196	0.000719752
	9.8938	0.0821	9.8896	0.15093	11.5738	0.01501			12.1092	0.04906	11.6856	0.00628	11.035	0.000715344
	9.903	0.08243	9.89769	0.15198	11.5895	0.01564			12.1252	0.04885	11.7041	0.00686	11.0511	0.00136
	9.91147	0.08191	9.9057	0.15309	11.6064	0.01476			12.1411	0.04915	11.7205	0.00669	11.069	0.00201
	9.91941	0.08148	9.91372	0.1532	11.6248	0.0147			12.1572	0.04926	11.736	0.00689	11.0869	0.00245
	9.92711	0.08139	9.92159	0.15358	11.6416	0.01383			12.1753	0.04834	11.7519	0.00781	11.1031	0.00281
	9.9349	0.08143	9.92929	0.15363	11.6574	0.01306			12.1939	0.04964	11.768	0.00851	11.1189	0.00169
	9.94293	0.08216	9.93718	0.15381	11.673	0.01399			12.2102	0.0486	11.7855	0.00694	11.1344	0.00109
	9.9508	0.08263	9.94561	0.15349	11.6889	0.01332			12.2259	0.04889	11.8035	0.00734	11.1508	0.000597516
	9.95863	0.08296	9.95442	0.15308	11.706	0.01315			12.2418	0.04955	11.8201	0.00622	11.1686	5.60246e-05
	9.96665	0.08317	9.96365	0.1535	11.7242	0.01299			12.2578	0.04909	11.8358	0.00633	11.1861	0.000464125
	9.97495	0.08289	9.97288	0.15443	11.741	0.01299			12.2758	0.04872	11.8514	0.0061	11.2023	0.000684227
	9.98389	0.08254	9.98164	0.15434	11.757	0.01287			12.2944	0.04906	11.8677	0.006	11.2184	0.000321388
	9.99337	0.08284	9.98977	0.1533	11.7726	0.01414			12.3107	0.04908	11.8852	0.00594	11.234	0.000413671
	10.0028	0.08338	9.99777	0.1532	11.7886	0.0141			12.3264	0.04961	11.9031	0.00645	11.251	0.000368572
	10.0115	0.08348	10.0059	0.15357	11.8064	0.01425			12.3423	0.05166	11.9192	0.00702	11.2694	0.000432431
	10.0195	0.08362	10.014	0.15469	11.8247	0.015			12.3583	0.05134	11.935	0.00711	11.2869	0.000940837
	10.0272	0.08319	10.0221	0.15559	11.8414	0.01457			12.3761	0.0509	11.9508	0.00794	11.3028	0.00191
	10.0349	0.08327	10.0298	0.15597	11.8574	0.01454			12.3949	0.05154	11.9673	0.00744	11.3189	0.000920442
	10.0427	0.0836	10.0376	0.15615	11.8733	0.01518			12.4113	0.05097	11.9856	0.00727	11.3346	0.000712718
	10.0503	0.0842	10.0458	0.15635	11.8895	0.01438			12.4268	0.05127	12.0037	0.00698	11.3513	0.00103
	10.0581	0.08477	10.0544	0.15628	11.9073	0.01344			12.4424	0.052	12.0197	0.00643	11.3698	0.000877336
	10.0662	0.08466	10.0638	0.15655	11.9258	0.0131			12.4584	0.05299	12.0356	0.00711	11.3873	0.000273583
	10.0745	0.0847	10.0733	0.15718	11.9421	0.01276			12.4758	0.05257	12.0514	0.00741	11.4032	0.000856259
	10.0834	0.08455	10.0824	0.15776	11.958	0.01258			12.4944	0.05338	12.0677	0.00723	11.419	0.000162024
	10.0926	0.0845	10.0908	0.15814	11.9739	0.01459			12.511	0.05296	12.0861	0.00637	11.435	0.000637582
	10.1018	0.08373	10.0989	0.15835	11.99	0.01401			12.5263	0.05332	12.1046	0.00727	11.4519	0.000426762
	10.1104	0.0831	10.1071	0.15823	12.0075	0.01396			12.5419	0.05462	12.1207	0.00648	11.4705	0.00089753
	10.1185	0.08299	10.1152	0.15916	12.0261	0.01406			12.5578	0.0546	12.1365	0.0076	11.4881	0.0016
	10.1264	0.08247	10.1232	0.16008	12.0426	0.0141			12.5751	0.05497	12.1522	0.00828	11.5038	0.00212
	10.1343	0.08175	10.1308	0.16074	12.0584	0.01334			12.5935	0.05483	12.1685	0.00771	11.5198	0.00164
	10.1422	0.08167	10.1387	0.16075	12.0742	0.01446			12.6103	0.05582	12.1868	0.00729	11.5354	0.000886675
	10.1499	0.08183	10.1469	0.16076	12.0901	0.01411			12.6259	0.05506	12.2051	0.00763	11.5519	0.0014
	10.1577	0.0815	10.1556	0.16072	12.1076	0.0127			12.6414	0.05664	12.221	0.00691	11.5699	0.000306401
	10.1658	0.08075	10.1648	0.16121	12.1258	0.01277			12.6573	0.05573	12.2367	0.00646	11.5865	0.000841457
	10.1744	0.08011	10.1741	0.16154	12.1423	0.01179			12.6747	0.05617	12.2523	0.00818	11.6026	0.000895829
	10.1832	0.08009	10.1829	0.16093	12.158	0.01226			12.6927	0.05582	12.2684	0.00738	11.6196	9.57301e-05
	10.1923	0.08038	10.1911	0.16091	12.1737	0.01274			12.7092	0.05609	12.2862	0.00752	11.6353	0.000455131
	10.2012	0.08012	10.1989	0.16085	12.1895	0.01366			12.7253	0.05689	12.3046	0.00787	11.6519	0.000917559
	10.2095	0.07955	10.2067	0.16055	12.2066	0.01314			12.7409	0.05787	12.3206	0.00833	11.6697	0.000418034
	10.2177	0.07932	10.2148	0.16055	12.2247	0.01406			12.7571	0.05823	12.3362	0.00854	11.6871	0.000870635
	10.2257	0.07983	10.2228	0.16111	12.2413	0.01311			12.7751	0.05765	12.3518	0.01	11.703	0.00147
	10.2337	0.07992	10.2306	0.16168	12.2572	0.01311			12.7933	0.05845	12.3677	0.00991	11.7189	0.00101
	10.2415	0.08047	10.2386	0.16225	12.273	0.01399			12.8098	0.05783	12.3855	0.00942	11.7345	0.000664975
	10.2492	0.08047	10.2468	0.16201	12.2892	0.01348			12.8259	0.05838	12.4036	0.00887	11.7503	0.000248532
	10.2571	0.08046	10.2554	0.162	12.3067	0.01307			12.8416	0.05902	12.4199	0.00817	11.7677	0.000177811
	10.2654	0.08052	10.2645	0.16262	12.3246	0.01295			12.8578	0.05869	12.4357	0.00759	11.7864	0.000247578
	10.2741	0.08049	10.2737	0.16328	12.3408	0.01297			12.8759	0.05892	12.451	0.00756	11.8021	0.000204822
	10.2833	0.08086	10.2827	0.16372	12.3564	0.01258			12.8941	0.05797	12.4674	0.00738	11.8181	0.000219347
	10.2926	0.08142	10.291	0.16414	12.3724	0.01378			12.9103	0.05806	12.4851	0.008	11.8335	0.00132
	10.3016	0.08135	10.2988	0.16489	12.3888	0.01332			12.9264	0.0572	12.5029	0.00838	11.8505	1.67758e-05
	10.31	0.08049	10.3065	0.16515	12.407	0.01326			12.9423	0.05932	12.5192	0.00948	11.8696	1.80636e-05
	10.318	0.08046	10.3145	0.1656	12.4253	0.01378			12.9583	0.0577	12.5353	0.00975	11.8878	0.000981078
	10.3261	0.08001	10.3224	0.16616	12.4414	0.01303			12.976	0.05832	12.5506	0.0109	11.9037	0.00153
	10.3342	0.08018	10.3301	0.16638	12.4572	0.01331			12.9943	0.05836	12.5672	0.00986	11.9194	0.00146
	10.3422	0.08121	10.3381	0.16663	12.4732	0.01374			13.0104	0.05829	12.5856	0.01009	11.935	0.000209434
	10.3501	0.08157	10.3463	0.16693	12.4894	0.01348			13.0263	0.05796	12.6034	0.00931	11.9522	0.00135
	10.3579	0.08143	10.3549	0.16705	12.5077	0.01176			13.0423	0.05875	12.6196	0.00923	11.971	0.000244354
	10.3661	0.08094	10.3639	0.16708	12.5263	0.01187			13.0585	0.05853	12.6359	0.00874	11.9882	0.000502547
	10.3749	0.0805	10.3728	0.16719	12.5424	0.01083			13.076	0.05654	12.6515	0.00963	12.0036	0.000947128
	10.3841	0.08059	10.3816	0.16692	12.5582	0.01118			13.0942	0.05718	12.6678	0.00873	12.0195	0.000630889
	10.3935	0.0809	10.3899	0.16727	12.5739	0.01266			13.1105	0.05574	12.6862	0.00877	12.0351	0.000395218
	10.4025	0.08072	10.3979	0.16772	12.59	0.01249			13.126	0.05654	12.704	0.00842	12.0522	0.000713863
	10.4108	0.08079	10.4058	0.16787	12.608	0.01289			13.1419	0.05677	12.7201	0.00912	12.0712	0.0012
	10.4183	0.08086	10.4137	0.16851	12.6268	0.01251			13.1578	0.05786	12.7363	0.00955	12.0886	0.00106
	10.4255	0.08062	10.4217	0.16931	12.6429	0.01259			13.1752	0.05695	12.7519	0.01076	12.104	0.00155
	10.4332	0.08071	10.4294	0.17	12.6585	0.0116			13.1931	0.05704	12.7682	0.00999	12.1198	0.000837158
	10.4415	0.08132	10.4374	0.17037	12.6741	0.01311			13.2098	0.0565	12.7864	0.01069	12.1355	0.000405014
	10.4502	0.08155	10.4457	0.17043	12.6901	0.01195			13.2256	0.0564	12.8044	0.01002	12.1521	0.00106
	10.4587	0.08219	10.4545	0.17126	12.7076	0.0114			13.2414	0.05692	12.8203	0.00989	12.1707	0.00141
	10.4672	0.08202	10.4637	0.17237	12.7261	0.01089			13.2578	0.05623	12.8365	0.00958	12.1881	0.00129
	10.4757	0.0816	10.4727	0.17287	12.7424	0.01109			13.2755	0.05603	12.8524	0.01003	12.2035	0.00161
	10.4849	0.08182	10.4814	0.17269	12.758	0.01132			13.2931	0.05557	12.8686	0.00894	12.219	0.00104
	10.4943	0.08205	10.4895	0.17273	12.7736	0.01224			13.3092	0.05535	12.8865	0.00907	12.2345	8.50742e-05
	10.5033	0.08206	10.4975	0.17313	12.7895	0.01273			13.3248	0.05513	12.9043	0.00929	12.2512	0.000876696
	10.5115	0.08142	10.5054	0.17391	12.807	0.0125			13.3412	0.0561	12.9202	0.00934	12.2695	0.001
	10.5194	0.0811	10.5134	0.1745	12.8253	0.01254			13.3578	0.05596	12.936	0.01028	12.2869	0.00172
	10.5272	0.08078	10.5213	0.17466	12.8417	0.01201			13.376	0.05606	12.9518	0.0115	12.3028	0.00219
	10.5353	0.08125	10.5291	0.17507	12.8575	0.012			13.3941	0.0566	12.9682	0.01175	12.3184	0.00192
	10.5434	0.08105	10.5373	0.17527	12.873	0.01259			13.41	0.05646	12.9861	0.01167	12.334	0.00203
	10.5512	0.08141	10.5459	0.175	12.8891	0.01233			13.4257	0.05712	13.0035	0.01124	12.3511	0.00175
	10.5591	0.08123	10.555	0.17524	12.9067	0.01276			13.4416	0.05807	13.0195	0.01084	12.3691	0.00178
	10.5672	0.08123	10.5644	0.17589	12.9246	0.0121			13.4583	0.05746	13.0354	0.01095	12.386	0.00134
	10.5755	0.08095	10.5736	0.17697	12.9409	0.01235			13.4764	0.05662	13.0511	0.01125	12.4023	0.00149
	10.5844	0.08041	10.5821	0.17744	12.9571	0.01225			13.4944	0.05679	13.0679	0.0106	12.4182	6.87023e-05
	10.5936	0.08071	10.5901	0.17708	12.9727	0.01353			13.5105	0.05705	13.0859	0.01077	12.4338	0.000856688
	10.6025	0.08117	10.598	0.17701	12.9891	0.01262			13.5262	0.05752	13.103	0.01065	12.4511	0.000413372
	10.6109	0.08137	10.6059	0.17761	13.0071	0.01365			13.542	0.05911	13.119	0.0109	12.4696	0.00144
	10.6188	0.08134	10.6139	0.17878	13.0251	0.01339			13.5584	0.05847	13.135	0.01102	12.4866	0.00185
	10.6266	0.08127	10.6219	0.1793	13.0413	0.01395			13.5767	0.05909	13.1507	0.01115	12.5026	0.00244
	10.6344	0.08153	10.6297	0.17923	13.0574	0.0136			13.5951	0.05853	13.1678	0.01055	12.5185	0.00125
	10.6424	0.08271	10.6378	0.17907	13.0731	0.01385			13.6112	0.05817	13.1864	0.01051	12.5342	0.0023
	10.6502	0.08267	10.6463	0.17946	13.0894	0.01253			13.6267	0.05713	13.204	0.01038	12.5515	0.00214
	10.6581	0.08229	10.6555	0.17949	13.1078	0.01279			13.6421	0.05796	13.2196	0.01015	12.5702	0.00143
	10.6663	0.08234	10.665	0.17951	13.1259	0.01201			13.6584	0.05667	13.2356	0.011	12.587	0.00192
	10.6748	0.08247	10.6743	0.18011	13.142	0.0113			13.6765	0.05629	13.2513	0.01134	12.6032	0.00212
	10.6838	0.08265	10.683	0.18117	13.1583	0.01177			13.6948	0.05585	13.2683	0.01112	12.6193	0.000746598
	10.6929	0.08252	10.6909	0.18219	13.1736	0.01276			13.7108	0.05535	13.287	0.01058	12.635	1.43397e-05
	10.7018	0.08209	10.6987	0.18213	13.1898	0.01229			13.7266	0.05638	13.3046	0.01014	12.652	0.00037891
	10.7102	0.08232	10.7064	0.18239	13.2084	0.01224			13.7419	0.05752	13.3204	0.01009	12.6706	0.000246383
	10.7182	0.08262	10.7143	0.18413	13.2266	0.01312			13.7579	0.05746	13.3364	0.01125	12.6875	0.000468809
	10.726	0.0822	10.7223	0.18571	13.2423	0.01246			13.7759	0.05749	13.3521	0.01134	12.7032	0.00096195
	10.7339	0.08202	10.7303	0.18637	13.2583	0.01277			13.7939	0.05763	13.3687	0.01085	12.7193	0.000339869
	10.7419	0.08256	10.7385	0.1862	13.2742	0.0132			13.81	0.05647	13.3875	0.01114	12.7351	0.000607401
	10.7577	0.08298	10.747	0.18634	13.2904	0.01271			13.8257	0.05616	13.4053	0.01049	12.752	0.00113
	10.7745	0.08207	10.756	0.18689	13.3079	0.01184			13.8411	0.05667	13.4209	0.01006	12.7704	0.00117
	10.7927	0.08252	10.7655	0.18715	13.3261	0.01133			13.8572	0.05559	13.4365	0.0104	12.7875	0.000779081
	10.8097	0.08194	10.775	0.18676	13.3421	0.0109			13.875	0.05554	13.452	0.01122	12.8031	0.000621358
	10.8255	0.08265	10.7837	0.18694	13.3579	0.01082			13.8928	0.05496	13.4684	0.01014	12.819	0.000478805
	10.8416	0.08299	10.7917	0.1875	13.3735	0.01158			13.9089	0.05517	13.4868	0.00994	12.8347	0.000746726
	10.8573	0.08333	10.7993	0.1875	13.3897	0.01065			13.9252	0.0549	13.5047	0.00981	12.8517	0.000379615
	10.8748	0.0832	10.807	0.18745	13.4074	0.01198			13.9407	0.05655	13.5204	0.01014	12.8698	5.3584e-06
	10.8935	0.08409	10.8149	0.18748	13.4252	0.01218			13.9573	0.05585	13.5359	0.01136	12.8866	0.0014
	10.9104	0.08469	10.8227	0.18873	13.4407	0.01309			13.9755	0.05696	13.5515	0.01162	12.9024	0.00134
	10.9261	0.08447	10.8305	0.18978	13.4563	0.01284			13.9934	0.057	13.5679	0.01185	12.9184	0.00125
	10.9422	0.08559	10.8385	0.18956	13.4726	0.01331			14.0096	0.05735	13.5859	0.01156	12.9343	0.000643099
	10.958	0.08476	10.8468	0.18905	13.4896	0.01214			14.0257	0.05738	13.6035	0.01119	12.9513	0.001
	10.9754	0.0841	10.8555	0.18955	13.5074	0.01135			14.0415	0.05844	13.6194	0.01021	12.9694	0.000194489
	10.9945	0.08339	10.8648	0.19033	13.5248	0.01038			14.058	0.05791	13.6351	0.01137	12.9861	0.00115
	11.0115	0.08327	10.8741	0.19071	13.5412	0.00973			14.0765	0.05759	13.6505	0.01149	13.002	0.000856609
	11.027	0.083	10.8829	0.19079	13.5571	0.01152			14.0944	0.05744	13.6672	0.01138	13.018	0.000450796
	11.0429	0.08471	10.891	0.1911	13.5726	0.01157			14.1104	0.05704	13.6854	0.01179	13.0338	0.000269272
	11.0586	0.08527	10.8988	0.19169	13.5896	0.01201			14.1263	0.05863	13.7028	0.01066	13.0515	0.000339891
	11.0756	0.08471	10.9065	0.19194	13.6081	0.01185			14.142	0.05907	13.719	0.01084	13.0702	0.00024735
	11.0947	0.08531	10.9143	0.19228	13.6257	0.01299			14.1586	0.05871	13.7351	0.01147	13.0869	0.000202519
	11.1118	0.08479	10.922	0.19259	13.6416	0.01217			14.1769	0.05865	13.7505	0.01181	13.1025	0.000905596
	11.1272	0.08428	10.9299	0.19334	13.6574	0.01311			14.1946	0.05915	13.7676	0.01155	13.1185	0.000415798
	11.143	0.08402	10.9379	0.19327	13.6731	0.01311			14.2103	0.05803	13.786	0.0125	13.1344	0.000195742
	11.1585	0.08469	10.9462	0.19289	13.6897	0.01185			14.2264	0.05846	13.8033	0.01177	13.1521	0.00125
	11.1753	0.0842	10.955	0.19278	13.7083	0.0115			14.2424	0.05938	13.8194	0.01167	13.171	0.000712059
	11.1941	0.08447	10.9641	0.19297	13.7262	0.01078			14.2587	0.05901	13.8356	0.01293	13.1877	0.00182
	11.2114	0.08418	10.9733	0.19324	13.742	0.01128			14.2768	0.05885	13.8512	0.01277	13.2033	0.00124
	11.2269	0.08468	10.9821	0.19332	13.7579	0.01174			14.2945	0.0592	13.8681	0.0119	13.2193	0.000930796
	11.2425	0.08549	10.9903	0.19329	13.7736	0.01346			14.3103	0.05961	13.8869	0.01193	13.2351	0.00022918
	11.2581	0.08588	10.9982	0.19291	13.7901	0.01232			14.3262	0.05957	13.904	0.01086	13.2526	0.00101
	11.275	0.08546	11.0061	0.19367	13.8088	0.01332			14.3417	0.06057	13.9199	0.01042	13.2714	3.96981e-05
	11.2934	0.08544	11.0138	0.19391	13.8267	0.01265			14.358	0.06076	13.9363	0.01061	13.2881	0.00115
	11.3106	0.08525	11.0213	0.19441	13.8424	0.01208			14.376	0.06132	13.9519	0.01147	13.3035	0.00129
	11.3263	0.08523	11.0289	0.19416	13.8582	0.01265			14.3935	0.06132	13.9685	0.01018	13.3191	0.000413611
	11.342	0.08568	11.0371	0.19405	13.8739	0.01377			14.4095	0.06122	13.987	0.01122	13.3349	5.81208e-05
	11.3575	0.08617	11.0457	0.19452	13.8902	0.01293			14.4254	0.06219	14.0044	0.0099	13.352	0.000345187
	11.3742	0.08631	11.0545	0.19454	13.9083	0.01257			14.4411	0.06185	14.0201	0.00982	13.3708	0.00116
	11.3924	0.08622	11.0636	0.19421	13.9265	0.01253			14.4579	0.06168	14.0363	0.00963	13.3876	0.000525077
	11.4093	0.0852	11.0727	0.19404	13.9422	0.01214			14.4758	0.061	14.0522	0.01044	13.4031	0.00108
	11.4255	0.08601	11.0811	0.19446	13.9577	0.0127			14.493	0.0616	14.0687	0.00904	13.4187	9.42508e-05
	11.4413	0.08668	11.0892	0.19439	13.9732	0.01397			14.5089	0.06061	14.0869	0.00861	13.4345	0.00025213
	11.457	0.08665	11.0975	0.19479	13.9894	0.01336			14.5249	0.06174	14.1044	0.00799	13.4516	8.01796e-05
	11.4749	0.08652	11.1057	0.19493	14.0073	0.01435			14.5408	0.06171	14.12	0.00756	13.47	0.000310455
	11.4934	0.08706	11.1137	0.19632	14.0254	0.01429			14.5578	0.06136	14.1359	0.00922	13.487	0.00182
	11.5099	0.08739	11.1215	0.19754	14.0414	0.01502			14.5763	0.0615	14.1517	0.00959	13.5027	0.00133
	11.5257	0.08763	11.1292	0.19764	14.0572	0.01407			14.5938	0.06146	14.1684	0.00981	13.5184	0.00142
	11.5415	0.08853	11.1373	0.19731	14.0726	0.01466			14.6094	0.06135	14.1864	0.00992	13.5342	0.000745344
	11.5572	0.08829	11.1459	0.19773	14.0892	0.01337			14.6253	0.06085	14.2035	0.01002	13.5514	0.00198
	11.5747	0.08804	11.155	0.19885	14.1071	0.01283			14.6412	0.06144	14.2194	0.00915	13.5696	0.000458117
	11.5935	0.08749	11.1643	0.19925	14.1245	0.01204			14.6582	0.05893	14.2353	0.00913	13.5861	0.00225
	11.6103	0.08663	11.1732	0.19942	14.1407	0.01207			14.6769	0.05822	14.251	0.00997	13.6021	0.00142
	11.6264	0.08622	11.1815	0.19901	14.1567	0.01306			14.6946	0.05627	14.268	0.00921	13.6178	0.000777638
	11.6427	0.08725	11.1893	0.1995	14.172	0.0134			14.7102	0.05584	14.286	0.01014	13.6337	0.000806147
	11.6585	0.08748	11.1975	0.19977	14.189	0.01412			14.7261	0.05509	14.3027	0.00909	13.6515	0.000703209
	11.6757	0.08694	11.2057	0.19983	14.2075	0.01384			14.7418	0.05565	14.3187	0.01015	13.67	0.000942265
	11.6941	0.08757	11.214	0.19967	14.225	0.01437			14.7588	0.05432	14.3347	0.00975	13.6864	0.0015
	11.7109	0.08709	11.222	0.19982	14.2412	0.0136			14.7774	0.05421	14.3505	0.01022	13.7026	0.00205
	11.7265	0.08666	11.2299	0.20074	14.2573	0.01463			14.795	0.05352	14.3681	0.00912	13.7186	0.000330882
	11.7426	0.0865	11.2381	0.20041	14.2729	0.01427			14.8106	0.0528	14.3869	0.00995	13.7345	0.00219
	11.7585	0.08661	11.2467	0.19997	14.2897	0.0136			14.8262	0.05294	14.4038	0.00931	13.7523	0.00139
	11.7754	0.08592	11.2558	0.20026	14.3084	0.01358			14.8418	0.05294	14.4195	0.00886	13.7708	0.00114
	11.7938	0.08622	11.2652	0.20108	14.3258	0.01319			14.8585	0.05137	14.4354	0.01002	13.787	0.00169
	11.8107	0.08533	11.2743	0.20151	14.3418	0.01339			14.8769	0.05073	14.4512	0.00958	13.8031	0.00119
	11.8263	0.08535	11.2827	0.20115	14.3579	0.01381			14.8946	0.05049	14.4686	0.00888	13.8192	0.000374528
	11.8421	0.08501	11.2906	0.20089	14.3736	0.01495			14.91	0.05025	14.4875	0.00812	13.8351	6.49916e-05
	11.858	0.08534	11.2986	0.2017	14.3903	0.01378			14.9257	0.05038	14.5043	0.00826	13.8528	0.00071297
	11.875	0.08464	11.3067	0.20292	14.4086	0.01502			14.9414	0.05203	14.5199	0.00739	13.8711	0.000182791
	11.893	0.08521	11.3147	0.20301	14.426	0.01468			14.958	0.05095	14.536	0.0091	13.8874	0.00103
	11.91	0.08537	11.3225	0.20362	14.4417	0.01484			14.9762	0.05122	14.5518	0.0097	13.9034	0.00125
	11.9257	0.0862	11.3303	0.20467	14.4579	0.01526			14.9937	0.05015	14.5689	0.00963	13.9195	0.000515044
	11.9415	0.08613	11.3382	0.2054	14.4737	0.01566			15.0095	0.05074	14.5878	0.0105	13.9354	0.000782439
	11.9576	0.08554	11.3463	0.20559	14.4901	0.01495			15.0253	0.05012	14.6049	0.01005	13.9528	0.0011
	11.975	0.08502	11.3551	0.20524	14.5083	0.01386			15.0408	0.05066	14.6203	0.00965	13.971	0.00049717
	11.9929	0.08462	11.3644	0.20537	14.526	0.01439			15.0574	0.04965	14.636	0.00945	13.9869	0.000777191
	12.0094	0.08336	11.374	0.20568	14.5417	0.01364			15.0755	0.04994	14.6518	0.00994	14.0022	0.00143
	12.0252	0.08309	11.3829	0.2057	14.5576	0.01484			15.0927	0.04913	14.6685	0.00796	14.019	0.000458515
	12.0411	0.08475	11.3911	0.20548	14.5733	0.01495			15.1089	0.0493	14.6872	0.00785	14.0351	0.000845073
	12.0572	0.08433	11.399	0.2054	14.5898	0.01585			15.1248	0.05046	14.7046	0.00706	14.0524	0.00115
	12.0754	0.08424	11.407	0.20528	14.6079	0.01561			15.1402	0.0505	14.7201	0.00703	14.0702	0.00122
	12.094	0.08416	11.415	0.2062	14.6252	0.01554			15.1575	0.05041	14.7356	0.00801	14.0865	0.00163
	12.1102	0.08516	11.4228	0.20654	14.641	0.01605			15.1762	0.05016	14.7512	0.00827	14.1023	0.0014
	12.126	0.0863	11.4306	0.20617	14.6568	0.0162			15.1934	0.05	14.7681	0.00882	14.1182	0.00139
	12.1419	0.0877	11.4387	0.20635	14.6727	0.01618			15.2094	0.04987	14.7864	0.00866	14.1344	0.00112
	12.1579	0.08683	11.4471	0.20731	14.6896	0.01517			15.2254	0.05057	14.8036	0.00871	14.1517	0.00178
	12.176	0.08599	11.456	0.20792	14.7076	0.01555			15.241	0.05065	14.8195	0.00814	14.1686	0.000704876
	12.1946	0.08628	11.4652	0.20798	14.7246	0.01453			15.2582	0.04949	14.8352	0.00934	14.1857	0.00141
	12.211	0.0852	11.4743	0.20774	14.7405	0.01524			15.2768	0.04994	14.8508	0.00875	14.2016	0.000126828
	12.2266	0.08552	11.4828	0.20811	14.7561	0.01562			15.294	0.04843	14.8679	0.00869	14.2174	1.11874e-05
	12.2425	0.08647	11.4909	0.20925	14.7719	0.01556			15.31	0.0484	14.886	0.00832	14.2333	9.29235e-06
	12.2583	0.08668	11.4987	0.20977	14.789	0.01534			15.3262	0.04826	14.9028	0.00786	14.2518	3.08751e-05
	12.2761	0.08577	11.5064	0.20949	14.8079	0.01519			15.3419	0.04955	14.9188	0.00839	14.2704	0.000108705
	12.2951	0.08618	11.5139	0.21041	14.8257	0.01467			15.3589	0.04808	14.9346	0.0086	14.2866	0.000299948
	12.3114	0.08622	11.5212	0.21122	14.8413	0.01437			15.3774	0.04866	14.9503	0.0086	14.3025	0.000766013
	12.3268	0.08705	11.5288	0.21121	14.8572	0.01536			15.3945	0.0482	14.968	0.00866	14.3185	0.000493336
	12.3425	0.0892	11.5375	0.2111	14.8729	0.01564			15.4102	0.04788	14.9864	0.00931	14.3346	0.000979686
	12.3584	0.0885	11.5465	0.21139	14.8902	0.01499			15.4263	0.04815	15.0031	0.00828	14.3528	0.000609572
	12.3757	0.08827	11.5559	0.21259	14.9092	0.01464			15.442	0.04753	15.0193	0.00892	14.3712	0.00108
	12.3946	0.08802	11.5652	0.2135	14.9263	0.01362			15.4587	0.04676	15.0355	0.00976	14.3872	0.00102
	12.4111	0.08732	11.5741	0.21311	14.9419	0.01379			15.477	0.04548	15.0511	0.00868	14.4031	0.00113
	12.4265	0.08635	11.5823	0.21201	14.9577	0.01439			15.4941	0.04491	15.0686	0.00866	14.4191	0.000398294
	12.442	0.08744	11.5902	0.2126	14.9735	0.01554			15.5096	0.04371	15.0873	0.00845	14.4351	0.000354041
	12.4578	0.08715	11.5981	0.21344	14.9903	0.01462			15.5255	0.04492	15.1038	0.00814	14.453	0.000990444
	12.4751	0.08661	11.6061	0.21363	15.009	0.01602			15.5412	0.04534	15.1197	0.00786	14.4717	0.00027514
	12.4934	0.0869	11.6141	0.21381	15.0264	0.01587			15.558	0.0452	15.1359	0.0094	14.4878	0.000568598
	12.5102	0.08651	11.622	0.21411	15.0422	0.01585			15.5763	0.04536	15.1517	0.00913	14.5032	0.000153201
	12.526	0.08739	11.6298	0.21422	15.058	0.01654			15.5934	0.04477	15.1689	0.00872	14.5187	0.000256936
	12.5415	0.08817	11.638	0.21361	15.0736	0.01703			15.6093	0.04509	15.1875	0.00931	14.5348	0.000702674
	12.5574	0.08819	11.6464	0.21309	15.0902	0.01606			15.6252	0.0452	15.204	0.00809	14.5525	0.000581473
	12.5747	0.08834	11.6553	0.21265	15.1089	0.01537			15.641	0.04575	15.2197	0.00819	14.5712	0.0001734
	12.5927	0.08869	11.6644	0.21363	15.1264	0.01521			15.6579	0.04516	15.236	0.00818	14.5876	0.00108
	12.6092	0.08753	11.6731	0.21442	15.1419	0.01407			15.6761	0.04559	15.2519	0.00874	14.603	0.000663032
	12.6253	0.08719	11.6807	0.2137	15.1575	0.01539			15.6929	0.04444	15.2689	0.00686	14.6184	0.000588286
	12.641	0.08867	11.6876	0.21316	15.173	0.01608			15.7088	0.0441	15.2873	0.00764	14.6343	0.000675851
	12.657	0.08792	11.6948	0.21341	15.1897	0.01602			15.7247	0.04507	15.3041	0.00727	14.6516	0.000237999
	12.675	0.08799	11.7029	0.21395	15.208	0.01666			15.7406	0.04521	15.3195	0.0074	14.6698	7.29105e-05
	12.6933	0.08794	11.7124	0.2153	15.2254	0.0167			15.7581	0.04579	15.3354	0.00806	14.6865	0.000116861
	12.7096	0.08744	11.7215	0.21602	15.2412	0.01684			15.7767	0.04621	15.3513	0.00895	14.7026	0.000558938
	12.7259	0.08738	11.73	0.21569	15.2568	0.01741			15.7935	0.04683	15.3683	0.00871	14.7181	0.000157012
	12.7417	0.08989	11.7385	0.21644	15.2722	0.01815			15.8093	0.04689	15.3863	0.0084	14.7344	0.000484019
	12.7578	0.09024	11.747	0.21633	15.289	0.01706			15.8254	0.04778	15.4034	0.00862	14.7521	0.000655551
	12.7758	0.09008	11.756	0.21602	15.3071	0.0171			15.8413	0.04754	15.4192	0.00852	14.7698	0.000543566
	12.7941	0.09061	11.7653	0.21632	15.3242	0.01619			15.8589	0.04696	15.4352	0.00908	14.7861	0.000117003
	12.8103	0.08974	11.7742	0.21719	15.3406	0.01632			15.8775	0.04728	15.4512	0.00846	14.8021	0.000458256
	12.8265	0.08982	11.7824	0.21744	15.3567	0.01649			15.8944	0.04621	15.4684	0.00857	14.8175	0.00132
	12.8425	0.09041	11.7902	0.21819	15.3724	0.01589			15.91	0.04673	15.4865	0.00851	14.834	0.00144
	12.8585	0.09025	11.7979	0.21807	15.3898	0.01605			15.9257	0.04708	15.5028	0.00747	14.8521	0.0016
	12.8762	0.08982	11.8058	0.21774	15.4084	0.01609			15.9415	0.04782	15.5185	0.00799	14.87	0.00105
	12.8946	0.09085	11.8138	0.21833	15.4251	0.01576			15.959	0.04677	15.5345	0.00917	14.8862	0.000640347
	12.9106	0.0903	11.8217	0.21921	15.4411	0.01479			15.9781	0.0478	15.5508	0.00902	14.9024	0.00115
	12.9265	0.09019	11.8298	0.21957	15.457	0.0168			15.9951	0.04807	15.5686	0.00839	14.9182	0.00164
	12.9426	0.09168	11.8381	0.21918	15.4728	0.01637			16.0106	0.04848	15.5872	0.00943	14.9345	0.000752239
	12.9586	0.09134	11.8465	0.21847	15.4901	0.0166			16.0261	0.04894	15.6036	0.00879	14.953	0.00069955
	12.9761	0.09111	11.8546	0.21864	15.5087	0.01658			16.0417	0.04848	15.6192	0.00933	14.9709	0.000481878
	12.9945	0.09137	11.8632	0.21903	15.5255	0.01653			16.0587	0.04702	15.6352	0.01	14.9869	7.90453e-05
	13.0107	0.09128	11.8725	0.21828	15.5415	0.0157			16.0776	0.04549	15.6515	0.01002	15.0031	0.00023029
	13.0262	0.09101	11.8822	0.21783	15.5576	0.01696			16.0947	0.04463	15.6692	0.00957	15.0189	0.00139
	13.042	0.09205	11.8911	0.21864	15.5731	0.01672			16.11	0.04333	15.6877	0.00953	15.0351	0.000400444
	13.0581	0.09251	11.8993	0.2195	15.5905	0.01593			16.1254	0.04406	15.7041	0.00855	15.0531	0.000130128
	13.0756	0.09218	11.9073	0.21918	15.6095	0.01684			16.141	0.04425	15.7197	0.0086	15.0712	0.000141916
	13.0933	0.09316	11.9152	0.21932	15.6262	0.01606			16.1581	0.04353	15.7355	0.00964	15.0871	0.000882494
	13.1098	0.09287	11.923	0.21985	15.6418	0.016			16.1766	0.04391	15.7515	0.00944	15.1029	0.000974426
	13.1254	0.09339	11.9309	0.22116	15.6575	0.0168			16.1936	0.0437	15.7695	0.00936	15.1189	5.106e-05
	13.1412	0.09375	11.9392	0.22149	15.6734	0.01744			16.2094	0.04423	15.7882	0.00973	15.1351	0.000650329
	13.1577	0.09364	11.9479	0.22136	15.6906	0.01661			16.2252	0.04504	15.8049	0.00978	15.1529	0.00105
	13.1752	0.09311	11.9571	0.22159	15.7089	0.01674			16.2408	0.04588	15.8205	0.00959	15.171	0.000664698
	13.1931	0.09392	11.9664	0.22207	15.7258	0.01677			16.2579	0.04508	15.8359	0.01102	15.187	0.000973822
	13.2093	0.09318	11.9754	0.22231	15.7413	0.01622			16.2762	0.04555	15.8518	0.01079	15.2027	0.000593188
	13.2251	0.0928	11.9837	0.22176	15.7572	0.01719			16.2928	0.04482	15.8693	0.01072	15.2184	5.00134e-05
	13.2409	0.09347	11.9915	0.2212	15.7731	0.01665			16.3087	0.04517	15.8878	0.01027	15.2346	0.000118802
	13.2575	0.09278	11.9993	0.22122	15.7902	0.01742			16.3244	0.04608	15.9044	0.00943	15.2523	0.000644649
	13.2758	0.09317	12.0071	0.2219	15.8081	0.01752			16.3402	0.04594	15.9203	0.00879	15.27	0.000791204
	13.2936	0.09317	12.0148	0.22262	15.8238	0.01771			16.3577	0.04642	15.9357	0.0103	15.2861	0.00159
	13.3097	0.09355	12.0223	0.22255	15.8402	0.01737			16.3765	0.04665	15.9512	0.01054	15.302	0.00129
	13.3258	0.09448	12.0296	0.22209	15.8569	0.01895			16.3934	0.04611	15.9683	0.01026	15.3178	0.000860494
	13.3417	0.09692	12.0374	0.22189	15.8731	0.01879			16.4095	0.04663	15.9862	0.01128	15.3344	0.00132
	13.3583	0.09605	12.0463	0.22217	15.89	0.01783			16.4253	0.04778	16.0034	0.01151	15.3521	0.00148
	13.3767	0.09622	12.0559	0.22188	15.9078	0.01815			16.4412	0.04751	16.0195	0.01141	15.3696	0.00146
	13.3948	0.09565	12.0657	0.22193	15.9246	0.01721			16.4589	0.04705	16.0351	0.01235	15.3858	0.00136
	13.4108	0.09458	12.0749	0.22229	15.9405	0.01745			16.4772	0.0473	16.0508	0.01188	15.4017	0.000994506
	13.4264	0.09389	12.0833	0.22262	15.9565	0.01793			16.4939	0.04598	16.0681	0.01155	15.4173	0.000362403
	13.4422	0.09447	12.0912	0.22245	15.9725	0.0183			16.5099	0.04633	16.0863	0.01135	15.4343	0.000649076
	13.4587	0.09407	12.0988	0.22161	15.9897	0.01739			16.5259	0.04716	16.1026	0.01077	15.4527	0.000282679
	13.477	0.09369	12.1066	0.22188	16.0084	0.01781			16.5417	0.04731	16.1186	0.00946	15.4705	0.00108
	13.4949	0.09382	12.1143	0.22297	16.0254	0.01743			16.559	0.047	16.1344	0.01196	15.4863	0.00113
	13.511	0.094	12.122	0.22408	16.0413	0.01725			16.5777	0.0475	16.1497	0.01126	15.5022	0.00146
	13.5268	0.09474	12.1297	0.22378	16.0573	0.0181			16.5943	0.04692	16.1664	0.01083	15.5179	0.000659666
	13.5422	0.09576	12.1378	0.22368	16.0733	0.01783			16.61	0.04607	16.1768	0.01104	15.5346	0.00101
	13.5586	0.0951	12.1464	0.22387	16.091	0.01827			16.626	0.04711	16.1954	0.01167	15.5534	0.00113
	13.5767	0.09484	12.1554	0.2249	16.1096	0.01814			16.6419	0.04578	16.2116	0.01087	15.5713	0.000554869
	13.5947	0.09378	12.1646	0.22512	16.1259	0.0176			16.6591	0.04478	16.2277	0.01115	15.587	0.00121
	13.6106	0.09331	12.1735	0.22483	16.1415	0.01713			16.6775	0.04372	16.2435	0.01105	15.6029	0.000145278
	13.6262	0.09251	12.1819	0.22495	16.1574	0.01862			16.6943	0.04318	16.2604	0.01033	15.6186	0.000122888
	13.6416	0.09358	12.1899	0.22535	16.1732	0.01806			16.7098	0.04179	16.2788	0.00984	15.6351	0.000345477
	13.6576	0.09347	12.1979	0.22569	16.1909	0.01725			16.7256	0.04241	16.2961	0.00942	15.6537	0.000659376
	13.6752	0.09309	12.2058	0.22545	16.2099	0.01799			16.7415	0.04178	16.3119	0.00912	15.6718	0.000448882
	13.6934	0.09278	12.2137	0.22551	16.2266	0.01753			16.7586	0.04113	16.3274	0.01069	15.6876	0.00106
	13.7102	0.09302	12.2215	0.2262	16.242	0.01787			16.7767	0.04143	16.3435	0.01084	15.7032	0.000769744
	13.7261	0.09447	12.2292	0.2265	16.2577	0.01857			16.7935	0.0406	16.3606	0.01066	15.7188	0.000320093
	13.7416	0.09476	12.2374	0.22622	16.2736	0.01924			16.8093	0.0406	16.3791	0.01135	15.7352	0.00115
	13.7577	0.09574	12.246	0.22545	16.2909	0.01777			16.8251	0.04157	16.3963	0.01092	15.7532	0.00084334
	13.7754	0.09575	12.2549	0.22527	16.3096	0.01781			16.8414	0.04183	16.4121	0.01019	15.7712	0.00165
	13.7932	0.09635	12.2641	0.22585	16.3261	0.01677			16.8588	0.04133	16.4282	0.01096	15.787	0.0016
	13.8093	0.0954	12.2729	0.22565	16.3414	0.0168			16.8766	0.04156	16.444	0.01118	15.8025	0.00166
	13.8252	0.09612	12.2812	0.22524	16.3569	0.01776			16.8927	0.04126	16.4607	0.0104	15.8181	0.000447044
	13.8408	0.09597	12.2892	0.22486	16.3727	0.01823			16.9085	0.04085	16.4788	0.01082	15.8345	0.000551606
	13.8568	0.09537	12.2972	0.2253	16.3899	0.01843			16.9244	0.04218	16.496	0.0104	15.8524	0.000777298
	13.8757	0.09573	12.3053	0.22612	16.4083	0.01827			16.9406	0.04118	16.5118	0.01088	15.8701	0.000843943
	13.8937	0.09568	12.3132	0.22694	16.4252	0.01853			16.9586	0.0417	16.5276	0.01141	15.8862	0.00151
	13.9099	0.09542	12.3209	0.22657	16.4408	0.01848			16.977	0.04175	16.5432	0.01217	15.9022	0.000934578
	13.9259	0.0966	12.3289	0.2265	16.4564	0.01905			16.9933	0.04221	16.5599	0.01125	15.9178	0.00184
	13.9416	0.0984	12.3373	0.22704	16.4723	0.01859			17.0092	0.04246	16.578	0.01241	15.9343	0.00159
	13.9581	0.09792	12.3461	0.22735	16.4896	0.01904			17.0252	0.04457	16.5951	0.01175	15.952	0.00202
	13.9763	0.09785	12.3554	0.22748	16.5078	0.01858			17.0414	0.04375	16.6109	0.01255	15.9693	0.00214
	13.9942	0.0984	12.3647	0.22721	16.5243	0.01755			17.0593	0.04385	16.6268	0.01286	15.9858	0.00202
	14.0103	0.09789	12.3735	0.22769	16.5405	0.01798			17.0778	0.0442	16.6427	0.01321	16.0019	0.000540864
	14.0262	0.09883	12.3816	0.228	16.5562	0.0183			17.0941	0.04315	16.6598	0.01232	16.0174	9.79185e-05
	14.0421	0.09968	12.3897	0.22755	16.5723	0.01824			17.11	0.04351	16.6778	0.01235	16.0343	0.000341336
	14.0588	0.09968	12.3977	0.22663	16.5901	0.01724			17.1258	0.04505	16.6946	0.01144	16.0527	0.000426346
	14.0769	0.09872	12.4057	0.22668	16.6083	0.01815			17.1418	0.04505	16.7104	0.01109	16.0701	0.00104
	14.0946	0.09942	12.4138	0.22742	16.6248	0.01769			17.1596	0.04451	16.7265	0.01229	16.0862	0.0015
	14.1105	0.09825	12.4217	0.22734	16.6407	0.01872			17.1783	0.04535	16.7422	0.01256	16.1022	0.00124
	14.1264	0.09908	12.4297	0.22624	16.6565	0.01954			17.1945	0.04487	16.759	0.01208	16.118	0.000625071
	14.1422	0.10031	12.4381	0.22547	16.6725	0.02016			17.2101	0.04494	16.7776	0.01285	16.1349	0.00173
	14.1587	0.09999	12.4468	0.22589	16.6904	0.02005			17.2257	0.0468	16.7953	0.01235	16.1535	0.00136
	14.1759	0.09898	12.456	0.22642	16.7089	0.02004			17.2416	0.04655	16.8111	0.01243	16.171	0.00168
	14.1941	0.09949	12.4653	0.22637	16.7252	0.01922			17.259	0.04642	16.827	0.01239	16.1869	0.00207
	14.2104	0.09951	12.4741	0.22569	16.7413	0.01852			17.2778	0.0469	16.8429	0.01314	16.2029	0.00159
	14.2263	0.09938	12.4823	0.22534	16.7574	0.01928			17.2942	0.04719	16.8603	0.0116	16.2187	0.000757598
	14.2418	0.1006	12.4902	0.22564	16.7732	0.01815			17.3097	0.04664	16.8791	0.01271	16.2354	0.00131
	14.2581	0.10018	12.4983	0.22547	16.7907	0.0177			17.3252	0.04801	16.8961	0.01163	16.2536	0.00115
	14.276	0.10041	12.5063	0.22539	16.8095	0.01762			17.341	0.04855	16.9117	0.01227	16.2711	0.00145
	14.2934	0.09939	12.5142	0.22587	16.8258	0.01774			17.3584	0.04808	16.9276	0.01263	16.287	0.00146
	14.3094	0.09951	12.5221	0.22642	16.8415	0.01761			17.3767	0.04855	16.9435	0.01274	16.303	0.00126
	14.3253	0.09963	12.53	0.22642	16.8575	0.01847			17.3932	0.04838	16.9608	0.01222	16.3187	0.000360173
	14.3411	0.10076	12.5383	0.22528	16.8735	0.01848			17.4089	0.04878	16.9795	0.01227	16.3353	0.00131
	14.3576	0.1001	12.5471	0.22457	16.8909	0.01831			17.4244	0.04844	16.9965	0.01253	16.3535	0.00122
	14.3757	0.10107	12.5563	0.22473	16.9092	0.0181			17.4406	0.04817	17.012	0.01218	16.3709	0.00205
	14.393	0.10146	12.5655	0.22542	16.9256	0.01732			17.458	0.04705	17.0277	0.01415	16.3864	0.00228
	14.4089	0.10118	12.5744	0.22535	16.9412	0.01745			17.476	0.04643	17.0434	0.01362	16.4027	0.00144
	14.425	0.10172	12.5827	0.22481	16.9571	0.01816			17.4924	0.0451	17.0603	0.01395	16.4184	0.000491754
	14.441	0.10185	12.5906	0.22451	16.9731	0.01808			17.5084	0.04433	17.079	0.01247	16.435	5.59217e-05
	14.4579	0.10119	12.5984	0.2247	16.9904	0.01775			17.5241	0.04429	17.0961	0.01251	16.4532	0.000109529
	14.4763	0.10079	12.6065	0.22521	17.0083	0.01789			17.5404	0.04299	17.1117	0.01196	16.4703	0.000298345
	14.4938	0.10097	12.6145	0.22541	17.0247	0.01828			17.5585	0.0425	17.1272	0.01288	16.4861	0.00076638
	14.5095	0.10058	12.6223	0.22609	17.0405	0.01843			17.5766	0.04176	17.1427	0.01294	16.5021	3.90687e-05
	14.5254	0.10178	12.6302	0.22697	17.0564	0.01931			17.5929	0.04178	17.1597	0.01273	16.5179	0.000431193
	14.5414	0.10267	12.6385	0.22717	17.0727	0.01903			17.6091	0.04186	17.1782	0.01311	16.5347	7.06623e-05
	14.5584	0.10183	12.6472	0.22698	17.0902	0.0195			17.6249	0.04296	17.1953	0.01207	16.5513	0.000430597
	14.5771	0.10274	12.6562	0.22682	17.1079	0.019			17.6412	0.04212	17.211	0.01279	16.5687	0.000623371
	14.5947	0.10247	12.6654	0.22712	17.1241	0.01917			17.6594	0.04185	17.2268	0.01281	16.5858	0.00028393
	14.6104	0.10196	12.6741	0.22689	17.14	0.0187			17.6775	0.04175	17.2423	0.0129	16.6019	0.000197253
	14.6261	0.10217	12.6823	0.22625	17.1559	0.02			17.6935	0.0404	17.2593	0.01149	16.6177	0.000227804
	14.642	0.10391	12.6902	0.2261	17.1723	0.01897			17.7096	0.04029	17.2774	0.01161	16.6348	0.000984819
	14.6588	0.10259	12.698	0.22611	17.1906	0.01856			17.7255	0.04078	17.2943	0.01042	16.6533	1.56292e-05
	14.6773	0.10287	12.706	0.22672	17.2089	0.01794			17.7416	0.04049	17.3103	0.01106	16.6704	0.00122
	14.6949	0.10271	12.714	0.22668	17.2249	0.01792			17.7595	0.03991	17.3263	0.01205	16.6861	0.000652848
	14.7108	0.10311	12.7217	0.22649	17.2405	0.01858			17.7779	0.04083	17.3419	0.0115	16.702	6.85952e-05
	14.7262	0.10329	12.7296	0.22642	17.2565	0.02012			17.794	0.04068	17.3596	0.01111	16.7168	0.00018116
	14.7418	0.1052	12.7378	0.22644	17.2728	0.02027			17.8099	0.04121	17.3782	0.01136	16.7343	0.00143
	14.7584	0.10543	12.7464	0.22655	17.2912	0.02027			17.8256	0.04258	17.3949	0.01058	16.7541	0.0016
	14.7768	0.10595	12.7555	0.22768	17.3097	0.02118			17.8418	0.04179	17.4109	0.01029	16.7716	0.0021
	14.7945	0.10575	12.7645	0.22901	17.3256	0.0198			17.8595	0.04129	17.427	0.01259	16.7872	0.00286
	14.8104	0.10555	12.7733	0.22971	17.3414	0.02004			17.8776	0.04029	17.4427	0.01245	16.803	0.00103
	14.826	0.10605	12.7815	0.23048	17.3573	0.02058			17.8937	0.03998	17.4602	0.01219	16.8188	0.000531642
	14.8413	0.10657	12.7896	0.23079	17.3735	0.02036			17.9094	0.03921	17.4788	0.01232	16.8359	0.000748194
	14.8578	0.10597	12.7975	0.23077	17.3916	0.01954			17.9251	0.04038	17.4955	0.01156	16.8545	0.000741736
	14.8761	0.10563	12.8055	0.23144	17.41	0.01968			17.9411	0.03976	17.5115	0.01086	16.8719	0.000704303
	14.8937	0.10523	12.8135	0.23186	17.426	0.01943			17.9587	0.04013	17.5278	0.01167	16.8874	0.00124
	14.9097	0.1048	12.8213	0.23214	17.4414	0.01966			17.9766	0.0406	17.5435	0.01115	16.903	0.00156
	14.9255	0.10542	12.8294	0.23229	17.4566	0.02134			17.9928	0.04083	17.5609	0.01091	16.9185	0.000611697
	14.9409	0.10599	12.8377	0.23215	17.4728	0.02114			18.0088	0.04141	17.5793	0.01144	16.9353	0.00213
	14.9573	0.10609	12.8463	0.23252	17.4909	0.0213			18.0246	0.04241	17.596	0.01114	16.9538	0.00218
	14.9755	0.10706	12.8554	0.23308	17.5097	0.02162			18.0411	0.04261	17.6118	0.01115	16.9712	0.00283
	14.9928	0.10686	12.8645	0.23306	17.5259	0.02116			18.0587	0.04206	17.6277	0.01243	16.9868	0.00208
	15.0089	0.10697	12.8731	0.23224	17.5413	0.02068			18.0764	0.042	17.6436	0.01252	17.0023	0.0018
	15.0251	0.10726	12.8811	0.23208	17.5569	0.02097			18.0924	0.04114	17.6605	0.01212	17.0178	0.000269111
	15.0406	0.10721	12.889	0.23224	17.5728	0.02105			18.108	0.04103	17.6788	0.0125	17.0346	0.000341724
	15.0576	0.10636	12.8969	0.233	17.5905	0.0196			18.1238	0.04109	17.6955	0.01152	17.053	0.000509713
	15.0761	0.10646	12.9049	0.23373	17.6087	0.02028			18.1406	0.0399	17.7111	0.01149	17.0703	0.000923416
	15.0934	0.10618	12.9128	0.23481	17.6251	0.01978			18.1592	0.03947	17.727	0.01187	17.0862	0.00185
	15.1094	0.10598	12.9206	0.23549	17.6409	0.02123			18.1771	0.03927	17.7428	0.01204	17.1021	0.000807586
	15.1255	0.1068	12.9288	0.23575	17.6564	0.02223			18.193	0.03911	17.7601	0.01063	17.1175	0.00146
	15.1413	0.10764	12.9374	0.23539	17.6726	0.02242			18.2089	0.03938	17.7782	0.01188	17.1342	0.00144
	15.1583	0.10757	12.9465	0.23569	17.6902	0.02242			18.2247	0.04136	17.7951	0.01151	17.1525	0.00146
	15.1769	0.10727	12.9558	0.23664	17.7081	0.02244			18.2414	0.04063	17.8108	0.01185	17.1695	0.00112
	15.1939	0.10717	12.965	0.23766	17.7242	0.02295			18.2598	0.04081	17.8267	0.01303	17.1855	0.00159
	15.2099	0.10727	12.9737	0.2387	17.7402	0.02244			18.2778	0.04116	17.8426	0.01301	17.2015	0.000751429
	15.226	0.10767	12.9816	0.23915	17.7557	0.02338			18.2937	0.04139	17.8599	0.01221	17.2171	0.000339079
	15.2418	0.10719	12.9895	0.23974	17.7723	0.02227			18.3097	0.04162	17.878	0.01163	17.2345	0.000939889
	15.2586	0.10694	12.9974	0.24023	17.7908	0.02296			18.3254	0.04317	17.8944	0.01123	17.253	0.000132782
	15.2772	0.10769	13.0054	0.24078	17.8086	0.02125			18.3418	0.04279	17.9102	0.00993	17.2699	0.00113
	15.2945	0.10693	13.0135	0.24053	17.8246	0.02128			18.3603	0.04266	17.9261	0.0118	17.286	0.000239884
	15.3102	0.10671	13.0214	0.24005	17.8407	0.02198			18.3787	0.04295	17.9422	0.0111	17.3021	0.000115844
	15.3264	0.10738	13.0295	0.23923	17.8565	0.02357			18.3944	0.04254	17.9601	0.0113	17.3179	0.000346329
	15.3421	0.10826	13.0381	0.23886	17.8729	0.02348			18.41	0.04336	17.9786	0.01142	17.3351	0.000542654
	15.3587	0.10757	13.0473	0.23908	17.8913	0.02372			18.4257	0.04443	17.9952	0.01163	17.3536	0.000291315
	15.3768	0.10822	13.0568	0.23909	17.9092	0.02432			18.4419	0.04452	18.011	0.01135	17.3706	0.00179
	15.394	0.10793	13.0661	0.23923	17.9253	0.02359			18.4598	0.04367	18.0268	0.01176	17.3865	0.00194
	15.4094	0.10821	13.0747	0.23963	17.9414	0.02411			18.478	0.04403	18.043	0.01155	17.4026	0.000776143
	15.4257	0.10901	13.0827	0.2401	17.9571	0.02405			18.494	0.04337	18.0611	0.01013	17.4183	0.00136
	15.4417	0.10889	13.0905	0.24058	17.9735	0.02373			18.5095	0.04388	18.0795	0.01175	17.4354	0.00141
	15.4584	0.10861	13.0983	0.24136	17.991	0.02312			18.5249	0.04386	18.0958	0.01032	17.4539	0.000628215
	15.4765	0.10807	13.1061	0.24303	18.0094	0.02324			18.541	0.04476	18.1113	0.01092	17.4708	0.000779733
	15.4935	0.10743	13.114	0.24471	18.0257	0.02236			18.559	0.0446	18.1272	0.0117	17.4867	0.001
	15.5095	0.10668	13.1219	0.24562	18.0419	0.02246			18.5771	0.04435	18.1433	0.01187	17.5027	0.000108178
	15.5255	0.10737	13.1299	0.24492	18.0577	0.02399			18.5933	0.04481	18.1612	0.01029	17.5186	6.40997e-05
	15.5412	0.10751	13.1384	0.24434	18.0739	0.02298			18.609	0.0457	18.1802	0.01079	17.5356	0.00123
	15.558	0.10735	13.1474	0.24452	18.0917	0.02393			18.6243	0.04603	18.1966	0.01056	17.5538	0.000878128
	15.5761	0.10828	13.1569	0.24479	18.1096	0.02308			18.6408	0.04538	18.2121	0.0098	17.5706	0.00162
	15.5928	0.10834	13.1662	0.24503	18.1256	0.02429			18.6586	0.04601	18.2276	0.01241	17.5863	0.000896215
	15.6086	0.10868	13.175	0.24504	18.1412	0.02427			18.6763	0.04463	18.2435	0.01157	17.6022	5.58626e-05
	15.6245	0.10917	13.1831	0.24596	18.1556	0.02556			18.6925	0.04417	18.2609	0.01197	17.6179	0.000966723
	15.6406	0.10978	13.191	0.24672	18.1719	0.02423			18.7085	0.04446	18.2792	0.01126	17.6348	0.000476711
	15.658	0.10929	13.1987	0.24749	18.1912	0.02573			18.724	0.04434	18.2956	0.01087	17.653	0.000933902
	15.6767	0.10939	13.2065	0.24789	18.2091	0.02473			18.7407	0.0433	18.3113	0.00962	17.67	0.000251856
	15.6936	0.1087	13.2143	0.24896	18.2249	0.02474			18.7591	0.04373	18.3269	0.01081	17.6858	0.000865835
	15.7094	0.10853	13.2221	0.24998	18.2407	0.02558			18.7768	0.04319	18.3426	0.01031	17.7017	3.63789e-05
	15.7254	0.10924	13.2301	0.24999	18.2564	0.02653			18.7929	0.04235	18.3601	0.01004	17.7176	0.000158018
	15.7414	0.10901	13.2385	0.24983	18.2729	0.02592			18.8089	0.04428	18.3786	0.01125	17.7348	0.00127
	15.7588	0.10885	13.2474	0.25002	18.2907	0.02551			18.8246	0.04405	18.3952	0.01046	17.7529	0.00181
	15.7776	0.10904	13.2567	0.25047	18.308	0.02653			18.8413	0.04324	18.4109	0.01108	17.7693	0.00241
	15.7946	0.1093	13.266	0.25087	18.3232	0.02652			18.8601	0.04374	18.4266	0.0116	17.7851	0.00292
	15.8102	0.10953	13.2748	0.25061	18.3385	0.02706			18.8778	0.04288	18.4423	0.01185	17.801	0.00213
	15.8261	0.11102	13.2829	0.25021	18.3555	0.02717			18.8937	0.0413	18.4597	0.01086	17.817	0.00143
	15.8418	0.11083	13.2906	0.25034	18.3725	0.02648			18.9098	0.04221	18.4778	0.01114	17.8348	0.00151
	15.859	0.11064	13.2983	0.25126	18.391	0.026			18.9255	0.04268	18.4944	0.01095	17.8534	0.000799795
	15.8778	0.11086	13.3062	0.25207	18.4088	0.02539			18.9419	0.04104	18.5105	0.01072	17.8699	0.00158
	15.8948	0.11057	13.3138	0.25278	18.4246	0.02584			18.9602	0.04101	18.5261	0.0122	17.8858	0.0012
	15.9104	0.11029	13.3216	0.25332	18.4406	0.02664			18.9778	0.0408	18.5423	0.01107	17.9018	0.000509996
	15.9262	0.11069	13.3295	0.25357	18.4565	0.02843			18.9935	0.04057	18.5603	0.01188	17.9178	0.00104
	15.9419	0.11191	13.3378	0.2539	18.4733	0.02732			19.0096	0.0412	18.5784	0.01087	17.9356	0.00122
	15.959	0.11128	13.3466	0.25404	18.4919	0.02808			19.0254	0.04193	18.5948	0.01156	17.9544	0.00108
	15.9777	0.1117	13.3558	0.254	18.5095	0.02752			19.0418	0.04151	18.611	0.011	17.971	0.00136
	15.9945	0.11148	13.365	0.25473	18.5253	0.0277			19.0599	0.04107	18.6266	0.0132	17.9866	0.00196
	16.01	0.11238	13.3736	0.25618	18.5412	0.02846			19.0778	0.04129	18.6428	0.01219	18.0024	0.000328424
	16.0256	0.11341	13.3817	0.25714	18.5568	0.02877			19.0935	0.04016	18.6608	0.01244	18.0182	0.000670049
	16.041	0.11426	13.3897	0.25782	18.5733	0.02801			19.1093	0.04052	18.6789	0.0122	18.0359	5.64464e-05
	16.0579	0.11455	13.3976	0.259	18.5922	0.02748			19.125	0.04055	18.6954	0.01124	18.0546	0.000531765
	16.0764	0.11341	13.4055	0.26016	18.6103	0.02803			19.1415	0.03994	18.7116	0.0111	18.0714	0.000573399
	16.0938	0.11336	13.4132	0.26092	18.6259	0.02691			19.1594	0.03973	18.7273	0.01158	18.0869	0.00165
	16.1096	0.11238	13.4208	0.26066	18.6414	0.02795			19.1769	0.03947	18.7434	0.01139	18.1026	0.000469689
	16.1253	0.11397	13.4289	0.25975	18.6571	0.029			19.1929	0.04004	18.7614	0.01078	18.1185	0.000983224
	16.141	0.1123	13.4373	0.26021	18.6734	0.02912			19.2086	0.04093	18.7795	0.01248	18.1359	0.00227
	16.158	0.11339	13.4461	0.26039	18.6916	0.02874			19.2233	0.04187	18.7958	0.0125	18.1544	0.00223
	16.1762	0.11316	13.4552	0.25998	18.7098	0.02901			19.2411	0.04073	18.8116	0.01255	18.1711	0.00272
	16.1929	0.11351	13.4643	0.25936	18.7255	0.02955			19.2597	0.04169	18.8274	0.01407	18.1867	0.00234
	16.2088	0.11342	13.4729	0.25905	18.7409	0.02931			19.2769	0.03972	18.8435	0.01388	18.2021	0.00165
	16.2247	0.11482	13.4811	0.25911	18.7565	0.03023			19.2927	0.04	18.861	0.01275	18.2177	0.00062384
	16.2405	0.11557	13.4892	0.25928	18.7729	0.02918			19.3086	0.04	18.8793	0.01164	18.235	0.000554046
	16.2581	0.11503	13.4972	0.25897	18.7908	0.02933			19.3241	0.04034	18.8956	0.01184	18.2533	0.000111724
	16.2765	0.11581	13.5051	0.25965	18.8087	0.02786			19.3414	0.0387	18.9113	0.01065	18.27	0.00020637
	16.2933	0.1143	13.5129	0.26116	18.8248	0.02818			19.3601	0.03958	18.927	0.0116	18.2858	0.000138685
	16.3094	0.11503	13.5207	0.26166	18.8406	0.02897			19.3772	0.03864	18.9431	0.01147	18.3014	0.00103
	16.3254	0.1151	13.5288	0.26149	18.856	0.02966			19.3929	0.03775	18.9606	0.01123	18.3172	0.00010862
	16.3411	0.11526	13.5375	0.26189	18.8727	0.02974			19.409	0.03872	18.9785	0.01089	18.3344	0.000933714
	16.3583	0.11554	13.5465	0.26287	18.8907	0.02994			19.4246	0.03844	18.9951	0.01109	18.3526	0.0017
	16.3767	0.11544	13.5558	0.26373	18.908	0.02966			19.4416	0.03849	19.0109	0.01137	18.3693	0.00229
	16.3935	0.11544	13.5649	0.26461	18.9241	0.02947			19.4604	0.0378	19.0266	0.01166	18.3854	0.00234
	16.4101	0.11557	13.5734	0.26432	18.9401	0.03111			19.4777	0.03815	19.0431	0.01212	18.4012	0.00124
	16.426	0.11824	13.5815	0.26469	18.9555	0.03045			19.4935	0.03691	19.0608	0.01113	18.4172	0.000516867
	16.4418	0.11676	13.5895	0.26583	18.9726	0.03033			19.5094	0.03772	19.0784	0.01125	18.4349	0.000474195
	16.4589	0.11775	13.5975	0.26627	18.991	0.03005			19.525	0.03669	19.0942	0.01064	18.4534	0.000389069
	16.4778	0.11795	13.6056	0.26678	19.0082	0.02926			19.542	0.03547	19.11	0.01104	18.4698	0.000508914
	16.4945	0.11789	13.6135	0.26757	19.0243	0.02802			19.5609	0.03481	19.1258	0.01102	18.4857	8.63107e-05
	16.5103	0.11712	13.6213	0.26787	19.0406	0.02931			19.5783	0.03333	19.1423	0.01078	18.5018	0.000417887
	16.5264	0.11817	13.6295	0.26811	19.0563	0.02944			19.5938	0.03354	19.1605	0.0104	18.5178	0.000215361
	16.5422	0.11857	13.6381	0.26849	19.0731	0.02934			19.6097	0.03343	19.1785	0.01063	18.5357	0.000751807
	16.559	0.11785	13.6472	0.26811	19.092	0.02967			19.6254	0.03488	19.195	0.01072	18.554	0.000951308
	16.5773	0.11922	13.6566	0.26911	19.1092	0.02946			19.642	0.03342	19.2109	0.01131	18.5703	0.00174
	16.5939	0.11846	13.6656	0.27025	19.125	0.02912			19.6604	0.0342	19.2267	0.01226	18.5865	0.00225
	16.6096	0.11931	13.674	0.27019	19.1412	0.03026			19.6781	0.0334	19.2432	0.01188	18.6025	0.000730756
	16.6256	0.1194	13.6821	0.27002	19.1569	0.03037			19.6936	0.03331	19.2616	0.01127	18.6185	0.0011
	16.6413	0.12053	13.69	0.27023	19.1735	0.02937			19.7091	0.03358	19.2796	0.01112	18.6362	0.000822074
	16.6583	0.12046	13.6982	0.2717	19.192	0.02972			19.7247	0.03347	19.2956	0.01012	18.6544	0.00076498
	16.6765	0.12084	13.7063	0.27369	19.2094	0.02943			19.7411	0.03335	19.3115	0.01031	18.6708	0.000596144
	16.6934	0.1205	13.7142	0.27426	19.225	0.02854			19.7593	0.03276	19.3272	0.01047	18.6866	0.00102
	16.7092	0.11992	13.722	0.27427	19.2412	0.02902			19.7771	0.03378	19.3435	0.00989	18.7023	0.000104745
	16.7249	0.12079	13.7302	0.27486	19.2571	0.02966			19.7929	0.0332	19.3618	0.00873	18.7182	0.000316385
	16.741	0.11953	13.7389	0.2754	19.2736	0.0288			19.8086	0.0348	19.3801	0.00942	18.7357	0.0016
	16.7582	0.11979	13.748	0.27569	19.2918	0.02844			19.8241	0.03446	19.3958	0.00913	18.7542	0.000887154
	16.7763	0.11986	13.7571	0.27515	19.3094	0.02802			19.841	0.03473	19.4115	0.00968	18.7708	0.00185
	16.7926	0.12092	13.766	0.27541	19.3251	0.02788			19.8591	0.03452	19.4271	0.01118	18.7866	0.00145
	16.8085	0.12119	13.7745	0.27605	19.3408	0.02815			19.8762	0.03442	19.4432	0.01019	18.8022	0.00142
	16.8246	0.1231	13.7825	0.2761	19.3565	0.02863			19.8923	0.03526	19.4612	0.00964	18.818	0.000508619
	16.8407	0.12317	13.7903	0.27548	19.3731	0.02791			19.9081	0.03539	19.4797	0.0093	18.8356	0.00173
	16.8586	0.12324	13.7983	0.27599	19.3911	0.02802			19.9236	0.03556	19.4956	0.00912	18.8536	0.000753922
	16.877	0.12378	13.8063	0.2772	19.4084	0.02702			19.941	0.03479	19.5107	0.0083	18.8698	0.00193
	16.8935	0.1235	13.814	0.27824	19.4243	0.02702			19.9595	0.03536	19.5266	0.01039	18.8856	0.00143
	16.9093	0.12397	13.8218	0.2782	19.4401	0.02712			19.9766	0.03445	19.5427	0.00991	18.9016	0.00063847
	16.9253	0.124	13.8299	0.27772	19.4559	0.02779			19.9928	0.03549	19.5604	0.0101	18.9176	0.000559016
	16.9415	0.12381	13.8384	0.27848	19.4728	0.02756			20.0088	0.03696	19.5785	0.00962	18.9351	0.00116
	16.9596	0.12355	13.8474	0.27958	19.4908	0.02868			20.0244	0.03698	19.5948	0.00963	18.953	0.00113
	16.9782	0.1235	13.8567	0.28036	19.5078	0.02801			20.0417	0.03792	19.6105	0.00924	18.9693	0.00186
	16.9943	0.12291	13.8659	0.28057	19.5238	0.0285			20.0604	0.03816	19.626	0.01025	18.9851	0.00217
	17.01	0.12348	13.8745	0.28004	19.5398	0.02865			20.0773	0.03787	19.6424	0.0101	19.0011	0.000935878
	17.0257	0.12481	13.8825	0.28013	19.5555	0.02821			20.0933	0.03701	19.6601	0.01022	19.0175	0.00198
	17.0417	0.12449	13.8904	0.28048	19.5731	0.02693			20.1095	0.03902	19.6777	0.00984	19.0354	0.00244
	17.0594	0.12504	13.8983	0.28018	19.5918	0.02673			20.1251	0.03784	19.6939	0.00946	19.0538	0.00145
	17.0781	0.12519	13.9063	0.28003	19.6086	0.02541			20.1421	0.03702	19.71	0.0095	19.0699	0.00119
	17.0946	0.12572	13.9139	0.28021	19.6244	0.02489			20.1605	0.03659	19.7255	0.00942	19.0856	0.00111
	17.1101	0.12603	13.9216	0.28107	19.6404	0.02623			20.1775	0.0369	19.7423	0.00856	19.1016	0.000168262
	17.1258	0.12729	13.9297	0.28114	19.6561	0.02576			20.1934	0.03756	19.7606	0.00805	19.1179	0.000242356
	17.1418	0.12644	13.9382	0.28053	19.6733	0.02483			20.2095	0.03793	19.7783	0.00811	19.1363	0.00149
	17.1593	0.12586	13.9472	0.2795	19.6923	0.02509			20.2252	0.03982	19.7945	0.00809	19.1543	0.00145
	17.1778	0.12628	13.9564	0.27997	19.7092	0.02459			20.2421	0.03935	19.8106	0.00898	19.1706	0.00207
	17.1943	0.12569	13.9653	0.28005	19.7247	0.02417			20.2604	0.04042	19.8263	0.00977	19.1865	0.002
	17.2097	0.12634	13.9736	0.27909	19.7408	0.02503			20.2775	0.0386	19.8429	0.00964	19.2023	0.000404412
	17.2254	0.12768	13.9815	0.27858	19.7566	0.02476			20.2932	0.03945	19.8615	0.00945	19.2186	0.000602698
	17.2411	0.12866	13.9893	0.27905	19.7736	0.02275			20.3092	0.03923	19.8791	0.0088	19.2367	0.000305556
	17.2584	0.12839	13.9972	0.28042	19.7931	0.02316			20.3249	0.04009	19.8951	0.00753	19.255	0.000409589
	17.2769	0.12955	14.0053	0.28096	19.8103	0.02151			20.3418	0.03945	19.9113	0.00786	19.2711	0.000514065
	17.2936	0.12892	14.0132	0.28031	19.8258	0.0213			20.3598	0.0395	19.927	0.00879	19.2866	0.000346175
	17.3093	0.12914	14.0211	0.27962	19.8414	0.02186			20.3768	0.03992	19.9434	0.00818	19.3023	0.00163
	17.3248	0.12945	14.0292	0.27964	19.857	0.02275			20.3925	0.03996	19.9618	0.0082	19.3182	5.20418e-05
	17.3407	0.12893	14.0377	0.27921	19.8738	0.02169			20.4084	0.04151	19.9796	0.00813	19.3359	0.00105
	17.3581	0.12826	14.0467	0.27827	19.8923	0.02189			20.4242	0.04127	19.9955	0.00832	19.3547	0.0013
	17.3761	0.12789	14.0558	0.27755	19.9095	0.02193			20.4415	0.04183	20.0114	0.00858	19.3709	0.00157
	17.3926	0.12748	14.0646	0.27733	19.9251	0.02106			20.4595	0.04186	20.027	0.00961	19.3863	0.00151
	17.4086	0.12766	14.073	0.27702	19.9406	0.02207			20.4762	0.04158	20.0435	0.0089	19.4018	0.000114903
	17.4242	0.12872	14.081	0.27588	19.9563	0.02142			20.492	0.04143	20.0617	0.00934	19.4178	0.000361991
	17.4404	0.12809	14.0889	0.27453	19.973	0.02114			20.508	0.04163	20.0794	0.00839	19.4354	0.000402737
	17.4585	0.12838	14.0969	0.2738	19.9911	0.01992			20.5239	0.04239	20.0951	0.00749	19.4536	0.000520656
	17.4766	0.128	14.1049	0.27394	20.0084	0.0198			20.5414	0.04081	20.111	0.00757	19.47	0.000905557
	17.4929	0.12734	14.1128	0.27372	20.0243	0.019			20.5601	0.04203	20.1265	0.00818	19.4858	0.000686831
	17.5089	0.12761	14.1207	0.27274	20.0402	0.02026			20.5768	0.04148	20.1427	0.00746	19.5013	0.000298774
	17.5247	0.1287	14.1291	0.27171	20.0559	0.01968			20.5926	0.04267	20.1607	0.00727	19.5175	0.000439264
	17.5407	0.128	14.1378	0.27104	20.0727	0.01925			20.6085	0.0424	20.1782	0.00755	19.535	0.000230196
	17.559	0.12769	14.1471	0.27085	20.0907	0.01944			20.6244	0.04363	20.1943	0.00712	19.5527	0.00116
	17.5772	0.12839	14.1565	0.27043	20.1077	0.01854			20.6421	0.04353	20.2104	0.00835	19.5692	0.00154
	17.5935	0.12744	14.1654	0.26906	20.124	0.01869			20.6611	0.04408	20.2261	0.0084	19.5854	0.00184
	17.6096	0.12777	14.1737	0.26752	20.1399	0.01945			20.6777	0.0439	20.2427	0.00877	19.601	0.000721942
	17.6256	0.12852	14.1816	0.26665	20.1556	0.01954			20.6934	0.04365	20.2606	0.00865	19.6175	0.00199
	17.6416	0.12918	14.1894	0.26599	20.173	0.01933			20.7093	0.04478	20.278	0.009	19.6357	0.00134
	17.6595	0.1291	14.1973	0.26498	20.1915	0.01929			20.7251	0.04429	20.2937	0.00803	19.6536	0.00133
	17.6778	0.12995	14.2055	0.26419	20.2084	0.01823			20.7426	0.04342	20.3095	0.00887	19.6697	0.00144
	17.6939	0.129	14.2134	0.26348	20.2243	0.01776			20.7614	0.0425	20.3254	0.00869	19.6857	0.00103
	17.7097	0.12951	14.2213	0.2631	20.2403	0.01897			20.7781	0.04277	20.3427	0.00804	19.7014	0.000383134
	17.7258	0.13033	14.2297	0.26182	20.2562	0.01818			20.7936	0.04239	20.3613	0.0072	19.7177	0.00036085
	17.7419	0.12938	14.2385	0.26002	20.2737	0.01813			20.8093	0.04322	20.3787	0.00729	19.7358	0.000890247
	17.7594	0.1292	14.2479	0.25953	20.2922	0.01806			20.8251	0.04405	20.3945	0.00765	19.7538	0.000950238
	17.7777	0.12957	14.2573	0.25968	20.309	0.01828			20.842	0.04321	20.4104	0.00889	19.7699	0.0016
	17.7938	0.1294	14.2663	0.25971	20.3248	0.01799			20.8609	0.04396	20.4261	0.0096	19.7865	0.00147
	17.8095	0.12938	14.2745	0.25892	20.3408	0.01931			20.8779	0.04372	20.4432	0.00974	19.8022	0.001
	17.8251	0.13062	14.2823	0.25818	20.357	0.01891			20.8933	0.04375	20.4622	0.01012	19.8186	0.00122
	17.8412	0.12966	14.2902	0.25817	20.3743	0.01758			20.9089	0.04433	20.4797	0.00977	19.8365	0.00188
	17.8588	0.12978	14.2982	0.25923	20.3925	0.01728			20.9246	0.04524	20.4953	0.00901	19.8545	0.00129
	17.8768	0.13021	14.3062	0.25957	20.4093	0.0151			20.9415	0.04468	20.511	0.01	19.8704	0.00149
	17.8932	0.13014	14.3141	0.25972	20.425	0.01481			20.9599	0.04442	20.5266	0.01034	19.8865	0.000682239
	17.9091	0.13068	14.322	0.25993	20.441	0.01528			20.9769	0.04488	20.5434	0.00985	19.9024	0.000375331
	17.925	0.13177	14.3303	0.25955	20.4569	0.01634			20.9925	0.04468	20.5624	0.00985	19.9185	0.000351356
	17.9412	0.13182	14.339	0.25938	20.474	0.01552			21.0081	0.04647	20.5803	0.01051	19.9363	0.00116
	17.9587	0.13105	14.3482	0.25901	20.492	0.01735			21.0239	0.04606	20.5959	0.00995	19.9544	0.00117
	17.9763	0.13105	14.3576	0.25866	20.5085	0.017			21.041	0.04698	20.6116	0.01094	19.9702	0.0018
	17.9924	0.12993	14.3665	0.25871	20.5249	0.01749			21.0594	0.04663	20.6271	0.01107	19.9859	0.00139
	18.0083	0.13085	14.3748	0.25875	20.541	0.01778			21.076	0.04696	20.6438	0.01047	20.0016	0.0012
	18.0243	0.131	14.3826	0.25871	20.5568	0.01828			21.0921	0.04682	20.6621	0.01044	20.018	0.00169
	18.041	0.13148	14.3904	0.2583	20.5739	0.01737			21.108	0.04814	20.6797	0.01027	20.0358	0.00147
	18.0591	0.13132	14.3983	0.25832	20.5919	0.01705			21.124	0.04762	20.6953	0.00988	20.0534	0.00135
	18.077	0.13219	14.4063	0.25918	20.6085	0.01715			21.1417	0.04754	20.7109	0.0108	20.0694	0.00135
	18.093	0.13203	14.414	0.26049	20.6243	0.01622			21.1602	0.04764	20.7262	0.01191	20.0852	0.000316603
	18.109	0.13315	14.4218	0.2603	20.6403	0.01738			21.1766	0.04687	20.7429	0.01083	20.101	0.000988021
	18.125	0.1343	14.4299	0.25982	20.6562	0.01743			21.1926	0.04715	20.7612	0.01102	20.1176	0.000686544
	18.1415	0.13297	14.4384	0.25966	20.6717	0.01709			21.2085	0.04798	20.7787	0.01099	20.1355	0.000178972
	18.1599	0.13315	14.4476	0.26017	20.6906	0.01642			21.2245	0.04774	20.7947	0.01098	20.1529	0.000554259
	18.178	0.1324	14.4571	0.2602	20.7082	0.01697			21.2422	0.04841	20.8105	0.01156	20.1689	0.00146
	18.1939	0.13189	14.4663	0.25892	20.7241	0.01597			21.2606	0.04945	20.826	0.01263	20.1846	0.000986514
	18.2096	0.13164	14.4747	0.25889	20.74	0.01678			21.2769	0.04918	20.8426	0.01254	20.2005	0.00128
	18.2253	0.13396	14.4903	0.25847	20.756	0.01724			21.293	0.0492	20.8604	0.01285	20.2175	0.000571263
	18.2416	0.1333	14.5058	0.25756	20.7736	0.01709			21.3092	0.05053	20.878	0.01228	20.236	0.00101
	18.26	0.13396	14.5213	0.25835	20.7921	0.01741			21.325	0.04916	20.8941	0.01185	20.2537	0.000432461
	18.2782	0.13477	14.538	0.25732	20.8084	0.01669			21.3424	0.04858	20.9101	0.01182	20.2695	0.00106
	18.294	0.13464	14.5562	0.25795	20.8238	0.01786			21.361	0.04851	20.9256	0.01155	20.2853	0.000498179
	18.3098	0.13495	14.5738	0.25766	20.8381	0.01731			21.3776	0.04845	20.9426	0.01048	20.3011	0.00126
	18.3255	0.13557	14.5896	0.25784	20.8545	0.01638			21.3933	0.04803	20.9612	0.01045	20.3179	0.000762312
	18.3417	0.13531	14.6054	0.25905	20.8745	0.01586			21.4093	0.05007	20.9784	0.01005	20.3367	0.000357775
	18.3597	0.13366	14.6209	0.25913	20.8936	0.01702			21.4251	0.04981	20.9944	0.01045	20.3546	0.000191904
	18.3781	0.13392	14.6377	0.25897	20.91	0.01551			21.4424	0.04886	21.0104	0.01156	20.3705	0.00105
	18.394	0.13283	14.6557	0.25841	20.9255	0.01639			21.4607	0.0493	21.0261	0.01243	20.3862	0.000977197
	18.4096	0.13375	14.6727	0.25801	20.9412	0.01877			21.4773	0.04938	21.0433	0.01211	20.4019	0.000229371
	18.425	0.13467	14.6889	0.25747	20.9572	0.01776			21.4927	0.04867	21.0622	0.01272	20.4187	0.000678328
	18.4411	0.13493	14.705	0.25897	20.9748	0.01701			21.5086	0.04933	21.0793	0.01217	20.4373	6.94776e-05
	18.4589	0.13503	14.7208	0.25847	20.9934	0.01685			21.5248	0.04997	21.0953	0.01183	20.455	0.000156152
	18.477	0.13555	14.738	0.25889	21.0089	0.01599			21.5421	0.04854	21.1113	0.01216	20.4707	0.000637587
	18.4934	0.13607	14.7566	0.25998	21.025	0.01512			21.5601	0.04856	21.1268	0.01274	20.4863	6.01539e-05
	18.5092	0.13574	14.7733	0.25947	21.0413	0.01717			21.5767	0.04806	21.1437	0.0118	20.5019	0.000628462
	18.5245	0.1368	14.7894	0.25855	21.0572	0.01698			21.5924	0.04854	21.1623	0.01182	20.5183	0.00012261
	18.541	0.13582	14.8054	0.25809	21.0744	0.01637			21.6083	0.04886	21.1794	0.0122	20.5366	0.00132
	18.5588	0.13613	14.821	0.25689	21.0928	0.01736			21.6243	0.04894	21.1951	0.01161	20.5546	0.000781498
	18.5762	0.13456	14.8383	0.25489	21.1094	0.01724			21.6416	0.04808	21.2112	0.01257	20.5705	0.00143
	18.5925	0.13434	14.8569	0.25391	21.1249	0.01746			21.6595	0.04856	21.227	0.01331	20.5861	0.001
	18.6085	0.13482	14.8739	0.25211	21.1403	0.01864			21.6759	0.04682	21.2437	0.01358	20.6014	0.00029203
	18.624	0.13533	14.8899	0.25166	21.1561	0.01876			21.6918	0.04717	21.2621	0.01307	20.6177	0.000792415
	18.6407	0.13524	14.9061	0.25213	21.1733	0.01818			21.7078	0.04689	21.2793	0.0133	20.6359	9.95664e-05
	18.6591	0.13543	14.9219	0.25195	21.1918	0.01804			21.7241	0.04625	21.2949	0.01218	20.6537	0.000831017
	18.6768	0.13595	14.9391	0.25097	21.2084	0.01675			21.7423	0.0448	21.3107	0.0131	20.6697	0.000170874
	18.693	0.13506	14.9574	0.25109	21.2244	0.01608			21.7606	0.04518	21.3266	0.01298	20.6855	0.00083644
	18.7092	0.13632	14.9742	0.25084	21.24	0.01734			21.7769	0.04389	21.3433	0.01246	20.7009	0.000721584
	18.7249	0.13623	14.99	0.25044	21.2557	0.01711			21.7927	0.04431	21.3613	0.0121	20.7174	0.000713956
	18.7414	0.13609	15.0063	0.25143	21.2728	0.01758			21.8086	0.04517	21.3785	0.01198	20.7354	0.000208848
	18.76	0.1362	15.022	0.25117	21.2911	0.01774			21.8249	0.04501	21.3943	0.01127	20.7527	0.00112
	18.7777	0.1366	15.0388	0.25045	21.3076	0.01784			21.8429	0.04518	21.4103	0.01136	20.7689	0.00122
	18.7936	0.13605	15.0571	0.24976	21.3236	0.01704			21.8613	0.04534	21.4261	0.01201	20.7851	0.00123
	18.81	0.13671	15.0741	0.2485	21.3394	0.01856			21.8771	0.04519	21.4433	0.01161	20.8005	0.000798001
	18.8255	0.13786	15.0897	0.24736	21.3555	0.01797			21.8929	0.04472	21.4614	0.01264	20.8173	0.00154
	18.8419	0.13657	15.1056	0.24802	21.3733	0.01851			21.9088	0.0456	21.4781	0.0116	20.8358	0.00147
	18.8604	0.13729	15.1213	0.24792	21.3917	0.01814			21.925	0.044	21.4939	0.01199	20.8533	0.00113
	18.8781	0.13711	15.1383	0.24762	21.4081	0.01805			21.9431	0.04336	21.5099	0.012	20.8693	0.00174
	18.8938	0.13709	15.1563	0.24868	21.4242	0.01744			21.9618	0.04243	21.5256	0.0119	20.8854	0.000253121
	18.9098	0.13701	15.1732	0.24916	21.44	0.01805			21.978	0.04144	21.5433	0.01041	20.901	3.60797e-05
	18.9255	0.13883	15.189	0.24901	21.4562	0.01737			21.9935	0.04137	21.562	0.01042	20.918	0.000463834
	18.9419	0.13779	15.205	0.25009	21.4739	0.01795			22.0092	0.04229	21.5787	0.01035	20.9367	0.000182932
	18.9599	0.13774	15.221	0.25041	21.4924	0.01825			22.0253	0.04233	21.5944	0.00944	20.954	0.00073092
	18.9778	0.13705	15.2379	0.25004	21.5086	0.01822			22.0428	0.04192	21.6103	0.01094	20.97	0.00144
	18.9937	0.13638	15.2559	0.25065	21.5247	0.01826			22.0606	0.04178	21.6261	0.01037	20.9861	0.00141
	19.0095	0.13647	15.2726	0.25086	21.5406	0.02021			22.0775	0.04113	21.6436	0.0108	21.0019	0.000816413
	19.0251	0.13695	15.2884	0.25119	21.5567	0.02013			22.0931	0.04154	21.6623	0.01008	21.0186	0.0021
	19.0415	0.13679	15.3044	0.252	21.5744	0.02058			22.1086	0.04177	21.6791	0.01045	21.0371	0.000813741
	19.0594	0.13712	15.3204	0.25194	21.5927	0.02032			22.1245	0.04131	21.6949	0.00968	21.0545	0.00143
	19.0769	0.1377	15.3383	0.25085	21.609	0.01976			22.142	0.04127	21.7109	0.01072	21.0702	0.000763933
	19.0929	0.13769	15.3568	0.25051	21.6249	0.0187			22.1603	0.04062	21.7266	0.00967	21.0864	0.000211003
	19.1086	0.13838	15.3733	0.24899	21.6407	0.01953			22.1767	0.03975	21.7441	0.00817	21.102	0.000782812
	19.1243	0.13911	15.3889	0.24863	21.6568	0.01911			22.1923	0.04015	21.763	0.00902	21.1184	0.000126175
	19.1411	0.13881	15.405	0.24761	21.6743	0.01906			22.2079	0.04128	21.7798	0.0085	21.1366	0.00106
	19.1589	0.13914	15.421	0.24612	21.6925	0.02006			22.2242	0.04104	21.7954	0.00874	21.1543	0.00151
	19.1762	0.13914	15.4388	0.24497	21.7087	0.02031			22.2417	0.04134	21.8112	0.00965	21.1703	0.00228
	19.1923	0.1387	15.4576	0.24483	21.7245	0.02058			22.2594	0.04109	21.827	0.01052	21.186	0.00134
	19.2082	0.13872	15.4742	0.24222	21.7402	0.02187			22.2759	0.04076	21.8438	0.00885	21.2016	0.00141
	19.2239	0.13916	15.4899	0.24108	21.7561	0.0218			22.2921	0.04086	21.8626	0.009	21.2182	0.00111
	19.2412	0.13844	15.5058	0.24012	21.7736	0.02134			22.3076	0.04129	21.8796	0.00822	21.2361	0.0015
	19.2597	0.13741	15.5218	0.23843	21.7917	0.02188			22.3239	0.03999	21.895	0.00783	21.2534	0.0015
	19.2768	0.13727	15.5393	0.23605	21.8081	0.02161			22.3421	0.03986	21.9106	0.00952	21.2693	0.00147
	19.2928	0.13725	15.5581	0.23512	21.8238	0.02106			22.3601	0.03881	21.9262	0.00979	21.2853	0.00109
	19.309	0.13866	15.5747	0.23324	21.8396	0.02144			22.3763	0.03801	21.943	0.00883	21.3009	0.000440482
	19.3247	0.13889	15.5902	0.23153	21.8559	0.02096			22.3923	0.03855	21.9614	0.00861	21.318	0.000264146
	19.3415	0.13868	15.6058	0.23046	21.8736	0.02037			22.408	0.03969	21.9787	0.00861	21.336	0.000315211
	19.3605	0.13898	15.6216	0.22807	21.8914	0.02093			22.4242	0.03899	21.9943	0.00767	21.3529	0.000857633
	19.378	0.13901	15.6388	0.22606	21.9074	0.02048			22.4425	0.03931	22.0099	0.00845	21.3689	0.000943512
	19.3937	0.13838	15.6577	0.2245	21.9232	0.02172			22.4607	0.03964	22.0257	0.00929	21.385	0.000992417
	19.4096	0.1388	15.6745	0.22291	21.9391	0.02286			22.4768	0.03879	22.0429	0.00902	21.4007	0.00134
	19.4254	0.13973	15.69	0.22121	21.9556	0.02264			22.493	0.03946	22.0611	0.00961	21.418	0.00205
	19.442	0.13836	15.7055	0.22194	21.9738	0.02162			22.5089	0.03992	22.0778	0.00912	21.4368	0.00222
	19.4608	0.13852	15.7211	0.22176	21.992	0.02241			22.5249	0.03916	22.0938	0.00951	21.4537	0.00191
	19.4785	0.13775	15.7382	0.22088	22.008	0.02147			22.5429	0.03811	22.1095	0.00957	21.4695	0.00195
	19.4941	0.13866	15.7567	0.22085	22.0238	0.02159			22.5612	0.03853	22.1252	0.00958	21.4855	0.000548622
	19.5098	0.13887	15.7736	0.22023	22.0399	0.02273			22.5772	0.03675	22.1429	0.00836	21.5013	0.000193685
	19.5252	0.14097	15.7894	0.22007	22.0563	0.02203			22.5931	0.03677	22.1614	0.00814	21.5185	0.000384334
	19.5417	0.14164	15.8051	0.22021	22.0746	0.02156			22.609	0.03785	22.1782	0.00723	21.5368	0.00111
	19.5602	0.14114	15.8207	0.21942	22.0931	0.02217			22.6252	0.03836	22.1945	0.00705	21.5547	0.00117
	19.5779	0.13984	15.8378	0.21819	22.109	0.02234			22.6429	0.0374	22.2103	0.00833	21.5704	0.00138
	19.5936	0.13935	15.856	0.21855	22.1247	0.02223			22.661	0.03767	22.2261	0.00849	21.5862	0.000964627
	19.6092	0.13881	15.8725	0.21676	22.1404	0.0239			22.6771	0.03809	22.2439	0.00903	21.6019	0.000206201
	19.6247	0.13835	15.8886	0.2164	22.1567	0.02373			22.6928	0.0374	22.2624	0.00902	21.6191	0.000847482
	19.6411	0.13909	15.9045	0.21675	22.1749	0.0233			22.7086	0.0381	22.2788	0.00896	21.638	7.42566e-05
	19.6593	0.1384	15.9205	0.21674	22.1932	0.02361			22.7247	0.03757	22.2949	0.00847	21.6553	0.0013
	19.677	0.13853	15.9382	0.21549	22.2093	0.02258			22.7424	0.03772	22.311	0.00995	21.6707	0.00102
	19.693	0.14017	15.9565	0.21528	22.2249	0.02222			22.7601	0.03718	22.3268	0.00974	21.6858	8.42229e-06
	19.7087	0.14097	15.9729	0.21457	22.2406	0.02325			22.7762	0.03798	22.3442	0.00885	21.7008	0.00109
	19.7243	0.14127	15.9889	0.21349	22.2569	0.0232			22.7921	0.03725	22.3626	0.00942	21.7187	0.000501091
	19.741	0.14273	16.0048	0.21395	22.2747	0.02236			22.8078	0.03845	22.3791	0.00889	21.7376	0.000220669
	19.7589	0.14266	16.0209	0.21236	22.2931	0.02315			22.8243	0.03839	22.3948	0.00897	21.7548	0.00123
	19.7762	0.14192	16.0388	0.21221	22.3091	0.02371			22.8421	0.03807	22.4109	0.00864	21.7701	0.00203
	19.7925	0.14279	16.0573	0.21099	22.3246	0.024			22.8596	0.03771	22.4268	0.00942	21.7857	0.00136
	19.8083	0.14271	16.0736	0.21097	22.3401	0.02568			22.8757	0.03759	22.4441	0.00843	21.8012	0.00048882
	19.8237	0.14195	16.0898	0.20895	22.356	0.02508			22.8916	0.03823	22.4625	0.00952	21.8179	0.000993598
	19.8409	0.14326	16.1057	0.21008	22.3737	0.02492			22.9075	0.03775	22.4791	0.00831	21.8363	0.00097728
	19.8594	0.14372	16.1216	0.20877	22.3919	0.02418			22.9242	0.03785	22.4947	0.00853	21.8539	0.00123
	19.8764	0.1419	16.1392	0.20827	22.4081	0.02426			22.9427	0.03665	22.5106	0.00974	21.8697	0.00106
	19.8925	0.14154	16.1578	0.20816	22.424	0.02354			22.9606	0.03724	22.5264	0.00933	21.8853	0.000957991
	19.9088	0.14272	16.1742	0.20784	22.4395	0.02483			22.9763	0.03576	22.5436	0.0087	21.9008	0.000576041
	19.9245	0.14278	16.1899	0.2078	22.4555	0.02477			22.9922	0.03694	22.5616	0.00832	21.9178	0.00107
	19.9416	0.14223	16.2059	0.20887	22.4733	0.02547			23.008	0.03726	22.5782	0.0085	21.9359	0.000471943
	19.9603	0.14292	16.2218	0.20893	22.4911	0.02509			23.0247	0.03741	22.5939	0.00738	21.9526	0.00212
	19.9774	0.14264	16.239	0.20799	22.5075	0.02541			23.0434	0.03748	22.6098	0.0092	21.9688	0.00216
	19.9933	0.14371	16.2575	0.20879	22.5236	0.02616			23.0608	0.03713	22.626	0.00878	21.9848	0.00185
	20.0096	0.14413	16.2741	0.2082	22.5392	0.02679			23.0768	0.03783	22.6435	0.00933	22.0004	0.00157
	20.0252	0.14344	16.2897	0.20341	22.5557	0.02684			23.0927	0.03854	22.6614	0.00955	22.0179	0.00189
	20.0419	0.14251	16.3052	0.19905	22.5739	0.02734			23.1077	0.03929	22.6778	0.00951	22.0364	0.00165
	20.0604	0.14418	16.3213	0.19407	22.5918	0.02723			23.1251	0.03769	22.6935	0.00978	22.0532	0.0019
	20.0776	0.14327	16.3389	0.1889	22.608	0.02667			23.1443	0.03725	22.7094	0.01019	22.0693	0.00166
	20.0934	0.14197	16.3567	0.18385	22.624	0.02711			23.1623	0.03596	22.7254	0.00971	22.0853	0.000573399
	20.1097	0.14198	16.3732	0.18253	22.6397	0.02728			23.1778	0.03486	22.7434	0.00882	22.1008	0.00124
	20.1256	0.14262	16.389	0.18184	22.6563	0.02568			23.1933	0.03513	22.7617	0.00917	22.1181	0.00143
	20.1422	0.14232	16.4048	0.18236	22.6747	0.02572			23.2089	0.03596	22.7779	0.00809	22.1371	0.00103
	20.1605	0.14247	16.4211	0.1817	22.6924	0.02535			23.2251	0.037	22.794	0.00859	22.154	0.00187
	20.1774	0.14139	16.4385	0.1813	22.7085	0.0254			23.2431	0.03648	22.8102	0.00993	22.17	0.00231
	20.1928	0.14187	16.4563	0.18149	22.7246	0.02551			23.2613	0.03731	22.8263	0.0092	22.1862	0.00177
	20.2089	0.14316	16.4726	0.18084	22.7403	0.02703			23.277	0.03677	22.8444	0.0094	22.2018	0.00109
	20.2248	0.14374	16.4885	0.1812	22.7571	0.02603			23.2926	0.0377	22.8631	0.00909	22.2191	0.00202
	20.2418	0.14286	16.5044	0.18105	22.7752	0.02662			23.3082	0.03846	22.8792	0.00917	22.2375	0.000585107
	20.2599	0.14274	16.5209	0.18072	22.7929	0.02652			23.3245	0.03773	22.895	0.0085	22.2541	0.00153
	20.2769	0.142	16.5391	0.18006	22.8088	0.02624			23.3425	0.03716	22.9108	0.01028	22.2699	0.0012
	20.2927	0.14182	16.5574	0.18052	22.8246	0.02642			23.3605	0.03701	22.9268	0.00886	22.2859	0.00060725
	20.3086	0.14284	16.5734	0.17941	22.8403	0.02685			23.3765	0.03649	22.9448	0.0091	22.3018	0.000163299
	20.3244	0.143	16.5892	0.17981	22.8567	0.02684			23.3924	0.03603	22.9634	0.00833	22.3188	0.000927807
	20.3414	0.14339	16.605	0.18037	22.8747	0.02662			23.4078	0.03754	22.9794	0.00831	22.3373	0.000238199
	20.3594	0.14348	16.6213	0.18044	22.8928	0.02719			23.4244	0.03722	22.995	0.00863	22.3542	0.000516485
	20.3762	0.14293	16.6396	0.18062	22.9088	0.02695			23.4422	0.03786	23.0107	0.0104	22.3698	0.00107
	20.3922	0.14273	16.657	0.18088	22.9243	0.02839			23.4597	0.03755	23.0265	0.01	22.3856	5.99331e-05
	20.4082	0.14433	16.674	0.18132	22.9399	0.02855			23.4759	0.03789	23.044	0.00985	22.4014	0.00015751
	20.4241	0.14468	16.6901	0.18131	22.9565	0.02842			23.4917	0.03784	23.0629	0.01038	22.4184	0.000918287
	20.4417	0.14423	16.7058	0.18198	22.9746	0.02829			23.5071	0.03889	23.0794	0.01017	22.4366	0.00114
	20.4602	0.14456	16.7218	0.18129	22.992	0.02815			23.5241	0.03786	23.0949	0.01079	22.4534	0.00116
	20.4769	0.14373	16.74	0.18106	23.008	0.0283			23.5427	0.03848	23.1103	0.01194	22.4689	0.00145
	20.4927	0.14324	16.7585	0.18026	23.0238	0.02835			23.5601	0.03787	23.1262	0.01202	22.4849	0.000602399
	20.5086	0.14447	16.7746	0.1795	23.0396	0.02905			23.5762	0.03815	23.1436	0.01128	22.5009	8.97515e-05
	20.5245	0.1457	16.7902	0.17943	23.0561	0.02862			23.5924	0.03847	23.162	0.01095	22.5182	0.000345083
	20.5422	0.14555	16.8058	0.18032	23.074	0.02872			23.6076	0.0389	23.1785	0.00983	22.5361	2.68355e-05
	20.5611	0.14591	16.8207	0.17988	23.0915	0.02837			23.6245	0.03888	23.1939	0.01029	22.5527	0.000672904
	20.5778	0.14521	16.8388	0.17931	23.1073	0.02878			23.6434	0.03954	23.2089	0.01088	22.5685	0.000239679
	20.5935	0.1454	16.8488	0.17981	23.1233	0.02929			23.661	0.03985	23.2254	0.01133	22.5844	0.000132862
	20.6095	0.14604	16.8665	0.17946	23.1392	0.02958			23.6768	0.0393	23.2434	0.01147	22.6004	0.000449629
	20.6252	0.14505	16.882	0.17937	23.1561	0.0298			23.693	0.04072	23.2614	0.01195	22.6184	0.000788549
	20.6425	0.1443	16.8975	0.17935	23.1745	0.02937			23.7086	0.04064	23.2777	0.01121	22.637	0.000975876
	20.6612	0.14478	16.9131	0.18057	23.1921	0.02971			23.7254	0.03999	23.2938	0.01166	22.6534	0.00181
	20.6781	0.14511	16.9297	0.18005	23.2079	0.02932			23.7437	0.03956	23.3093	0.0118	22.6691	0.00178
	20.6938	0.14469	16.9481	0.17994	23.2239	0.03059			23.7612	0.04057	23.3258	0.01128	22.6851	0.000264976
	20.7094	0.14599	16.9656	0.18023	23.2397	0.03042			23.776	0.03966	23.344	0.01073	22.701	0.000237944
	20.7252	0.14632	16.9813	0.18026	23.2566	0.02976			23.7921	0.04017	23.3619	0.01	22.7188	9.61582e-05
	20.7422	0.14697	16.9966	0.18127	23.2753	0.02931			23.8093	0.04123	23.3778	0.00938	22.7376	0.000162778
	20.761	0.14765	17.0125	0.18121	23.293	0.02898			23.8261	0.04112	23.3941	0.00955	22.7541	0.000381588
	20.778	0.14705	17.0296	0.18147	23.3087	0.02869			23.8441	0.04059	23.41	0.01041	22.7699	0.00124
	20.7935	0.14593	17.0476	0.1811	23.3246	0.02952			23.8616	0.04062	23.4262	0.00921	22.786	0.000189418
	20.8091	0.14626	17.0645	0.18089	23.3403	0.03088			23.8773	0.04104	23.4444	0.00921	22.8018	0.000534878
	20.8247	0.1464	17.0808	0.18151	23.3571	0.03006			23.8929	0.04118	23.4624	0.00916	22.8195	0.000899714
	20.8417	0.14513	17.0966	0.18189	23.3757	0.03134			23.9084	0.04083	23.4786	0.00961	22.8382	0.000667587
	20.8601	0.14549	17.1122	0.18168	23.3932	0.03136			23.9249	0.04094	23.4946	0.00907	22.8547	0.000877374
	20.8769	0.14533	17.1297	0.18044	23.408	0.03106			23.9422	0.04026	23.5105	0.01113	22.8702	0.000497095
	20.8927	0.14589	17.1482	0.18038	23.4246	0.03139			23.9588	0.03931	23.5266	0.01078	22.8859	0.000566793
	20.9084	0.14586	17.1649	0.17864	23.4406	0.03209			23.9762	0.03871	23.5439	0.01001	22.9017	0.000612998
	20.9241	0.14647	17.1811	0.17912	23.4569	0.03095			23.9924	0.03925	23.5627	0.00958	22.9189	0.00011605
	20.9413	0.14621	17.197	0.17985	23.4753	0.02978			24.0081	0.03816	23.5792	0.00878	22.9377	0.000524428
	20.9594	0.14732	17.2125	0.1801	23.4932	0.0304			24.025	0.03914	23.5952	0.00802	22.9544	0.000267909
	20.976	0.1469	17.23	0.17965	23.5089	0.02956			24.0429	0.03934	23.6109	0.00925	22.9698	0.000780452
	20.9922	0.14668	17.249	0.18	23.5244	0.03114			24.0596	0.03949	23.627	0.00981	22.9853	0.000545595
	21.0081	0.1472	17.2657	0.17933	23.5398	0.03174			24.0753	0.03967	23.6445	0.00907	23.001	0.000692416
	21.0239	0.14721	17.2817	0.17909	23.5562	0.03185			24.0912	0.04139	23.6626	0.01006	23.0183	0.000687479
	21.0416	0.14667	17.2978	0.17998	23.5743	0.0319			24.1068	0.04096	23.6787	0.00989	23.0366	0.0012
	21.06	0.14642	17.3133	0.1795	23.5921	0.03193			24.1231	0.04012	23.6943	0.01024	23.0535	0.00156
	21.0765	0.14576	17.3305	0.17792	23.6081	0.0319			24.1426	0.03991	23.7091	0.01113	23.0693	0.00155
	21.0925	0.14483	17.3491	0.17661	23.6238	0.03202			24.1605	0.03926	23.7249	0.01042	23.085	0.000238572
	21.1085	0.14591	17.3659	0.17482	23.6393	0.03353			24.1762	0.03898	23.7442	0.0098	23.101	0.000649968
	21.1245	0.14629	17.3816	0.17336	23.6559	0.03236			24.1923	0.03976	23.7625	0.00954	23.118	0.000430407
	21.1421	0.14627	17.3976	0.17272	23.6738	0.03277			24.208	0.04077	23.7787	0.00941	23.1361	4.3823e-05
	21.1606	0.14735	17.4135	0.17283	23.6911	0.03113			24.2253	0.04055	23.7943	0.00875	23.1517	7.60212e-06
	21.177	0.14651	17.4305	0.17265	23.7073	0.03136			24.2441	0.04143	23.8099	0.00993	23.1662	0.000771636
	21.1932	0.14621	17.449	0.17287	23.7234	0.03164			24.2612	0.04084	23.8263	0.00982	23.1832	0.000242012
	21.2094	0.1465	17.4658	0.17225	23.739	0.0324			24.2768	0.04129	23.8439	0.01042	23.2011	0.000590743
	21.2251	0.14577	17.4814	0.17254	23.7562	0.03216			24.2927	0.04263	23.8614	0.01021	23.2194	0.00181
	21.2425	0.14446	17.4974	0.1731	23.7747	0.03235			24.3084	0.04261	23.8769	0.01041	23.2375	0.00153
	21.2613	0.14461	17.5132	0.17261	23.7918	0.03225			24.3254	0.04218	23.8925	0.01041	23.2535	0.00164
	21.2777	0.14434	17.53	0.1719	23.8077	0.03211			24.3444	0.04235	23.9092	0.01108	23.2695	0.00117
	21.2935	0.14388	17.5482	0.17108	23.8235	0.0328			24.3617	0.04195	23.9262	0.01033	23.2853	0.000612457
	21.3094	0.14489	17.5651	0.17054	23.8392	0.03218			24.3772	0.04147	23.9447	0.00936	23.3014	0.000330213
	21.3253	0.14448	17.5807	0.16978	23.8564	0.03172			24.3929	0.04297	23.9625	0.00886	23.3193	0.000125013
	21.3424	0.14505	17.5964	0.17079	23.8751	0.03128			24.4086	0.04366	23.9785	0.00858	23.3369	0.000246957
	21.3608	0.1449	17.6127	0.17041	23.8924	0.02985			24.4251	0.04342	23.9944	0.00873	23.3531	0.00075064
	21.3773	0.14399	17.6299	0.17084	23.9083	0.02957			24.4436	0.04422	24.01	0.00957	23.3699	0.000794872
	21.3928	0.14336	17.6479	0.17081	23.9246	0.03			24.4613	0.04405	24.0266	0.00936	23.386	3.00609e-05
	21.4082	0.14427	17.6645	0.17041	23.9403	0.03071			24.4769	0.04428	24.0451	0.00959	23.4019	0.0013
	21.4241	0.14429	17.6804	0.17063	23.9572	0.0298			24.4923	0.04488	24.063	0.0094	23.4195	0.00182
	21.4411	0.14412	17.6962	0.17151	23.9755	0.03057			24.5079	0.04607	24.0789	0.00952	23.4381	0.00193
	21.4589	0.14445	17.7121	0.17101	23.9928	0.02985			24.5246	0.04512	24.0947	0.0097	23.4543	0.00209
	21.4765	0.1438	17.73	0.17112	24.0085	0.02973			24.5429	0.0457	24.1104	0.01032	23.4701	0.00205
	21.4931	0.14381	17.7486	0.17152	24.0247	0.02967			24.5605	0.0446	24.1268	0.00931	23.4859	0.000519572
	21.5088	0.14405	17.765	0.17077	24.0404	0.02947			24.5763	0.0446	24.1455	0.00868	23.5017	0.000873417
	21.5249	0.14385	17.7808	0.17076	24.0569	0.02855			24.592	0.04468	24.1636	0.00872	23.5191	0.000799905
	21.5421	0.14367	17.7968	0.17285	24.0753	0.02832			24.6076	0.04508	24.1792	0.0079	23.5376	0.000367299
	21.5598	0.14344	17.8127	0.17227	24.0926	0.02806			24.6245	0.0445	24.195	0.00816	23.554	0.000475801
	21.576	0.14293	17.8305	0.17189	24.1082	0.02718			24.6426	0.04553	24.2107	0.00889	23.5696	0.000898895
	21.5918	0.14335	17.8493	0.17231	24.124	0.02881			24.6595	0.04585	24.2269	0.00946	23.5854	0.000667028
	21.6076	0.14433	17.8659	0.17264	24.1397	0.02926			24.6756	0.04619	24.2449	0.00921	23.6013	0.00109
	21.6239	0.14328	17.8817	0.17254	24.1564	0.02876			24.6915	0.04691	24.2632	0.00994	23.6188	0.00215
	21.6421	0.14366	17.8976	0.17393	24.1745	0.02939			24.7071	0.04701	24.279	0.01001	23.6367	0.00162
	21.6604	0.14372	17.9134	0.17385	24.1916	0.02971			24.7245	0.04679	24.2944	0.01078	23.6531	0.00173
	21.6766	0.14312	17.931	0.17353	24.2073	0.02979			24.7429	0.04634	24.3098	0.01133	23.6689	0.00109
	21.6926	0.14261	17.9498	0.17394	24.2234	0.02969			24.7599	0.04566	24.326	0.01029	23.6843	0.000281798
	21.7085	0.14405	17.9664	0.17356	24.2393	0.03058			24.776	0.04519	24.344	0.00985	23.7009	8.56336e-05
	21.7245	0.14278	17.9819	0.17362	24.2562	0.02948			24.7921	0.04625	24.362	0.00948	23.7189	0.000123241
	21.7425	0.14232	17.9976	0.17519	24.2741	0.0297			24.8077	0.04593	24.3781	0.00979	23.7366	0.000670741
	21.7611	0.14281	18.0134	0.1757	24.291	0.02868			24.8251	0.04566	24.3938	0.01017	23.7527	0.000554367
	21.7774	0.14227	18.0306	0.17525	24.3068	0.02882			24.844	0.04614	24.4092	0.01121	23.7684	0.00149
	21.7932	0.14246	18.0494	0.17605	24.3228	0.03006			24.8607	0.0459	24.4258	0.0113	23.7841	0.000531545
	21.8092	0.14389	18.066	0.17572	24.3387	0.03044			24.8767	0.04563	24.4437	0.01168	23.8007	0.00225
	21.8252	0.14301	18.0815	0.17533	24.3563	0.03063			24.8928	0.04632	24.4611	0.01135	23.8189	0.00211
	21.843	0.14167	18.0971	0.17685	24.3749	0.03041			24.9085	0.04663	24.4775	0.01091	23.8371	0.00301
	21.8618	0.14227	18.1127	0.17725	24.3917	0.03131			24.9255	0.046	24.4935	0.01217	23.8531	0.00239
	21.8779	0.14194	18.1299	0.17695	24.4074	0.03001			24.9441	0.04599	24.509	0.01182	23.8691	0.00195
	21.8935	0.14196	18.1483	0.17693	24.4235	0.03215			24.961	0.04522	24.5258	0.01125	23.885	0.000549056
	21.9093	0.14357	18.1652	0.17671	24.4394	0.03117			24.9766	0.04446	24.5441	0.01086	23.9014	0.00105
	21.9253	0.14322	18.1812	0.17598	24.457	0.03143			24.9927	0.04504	24.5617	0.0109	23.9199	0.00109
	21.9427	0.1433	18.1968	0.17697	24.4759	0.03067			25.0086	0.04458	24.5778	0.00964	23.9382	0.000619371
	21.9613	0.14355	18.2126	0.17727	24.4927	0.03097			25.0254	0.04362	24.5939	0.01027	23.9541	0.00136
	21.9777	0.14408	18.2297	0.1771	24.5083	0.02978			25.0438	0.04358	24.6095	0.01112	23.9698	0.00102
	21.9931	0.14377	18.2477	0.17786	24.5242	0.0316			25.061	0.04411	24.626	0.01072	23.9855	0.000770036
	22.0085	0.14535	18.2643	0.17793	24.54	0.03248			25.0766	0.04367	24.6446	0.01092	24.0018	0.0012
	22.0243	0.14456	18.2803	0.17904	24.5574	0.03157			25.0923	0.04439	24.6623	0.01082	24.0197	0.00196
	22.0418	0.14463	18.296	0.17979	24.5763	0.03278			25.108	0.04548	24.6782	0.01079	24.0379	0.00222
	22.0602	0.14429	18.3121	0.18023	24.5933	0.03251			25.1249	0.04511	24.6946	0.01175	24.0544	0.00217
	22.0768	0.14392	18.3301	0.1804	24.6086	0.03296			25.143	0.0447	24.7102	0.0123	24.0701	0.00186
[truncated: 700 more rows]

[truncated: 3 more sheets: Figure 5d, Figure 5g, Figure 5h]
